# Supplementary material for: Metabolite Ratios as Quality Indicators for Pre-Analytical Variation in Serum and EDTA Plasma
Source: Metabolites. 2021 Sep 18;11(9):638. doi: 10.3390/metabo11090638 (PMC8465943; doi:10.3390/metabo11090638)
Supplement: Supplementary file 1 [file metabolites-11-00638-s001.zip › Supplemental Data 1 - Serum.xlsx]

## Sheet: Compound Table 
Variable	Compound	Superpathway	Subpathway	CHEMSPIDER	KEGG	HMDB	PUBCHEM	p-Value	Rank	q-Value (FDR)	fold change (2 h/0.5 h)	Coeficient of variation
Var_386	aspartate	Amino Acid	Alanine and Aspartate Metabolism	5745	C00049	HMDB00191	5960	6.55602e-10	1	4.41875e-07	1.93356	0.0775137
Var_172	leucylalanine	Peptide	Dipeptide	227625		HMDB28922	259321	6.59405e-10	2	2.22219e-07	5.10481	0.191553
Var_451	DSGEGDFXAEGGGVR*	Peptide	Fibrinogen Cleavage Peptide	21403111				1.91187e-09	3	4.29534e-07	0.415481	0.105761
Var_048	ADSGEGDFXAEGGGVR*	Peptide	Fibrinogen Cleavage Peptide	14654187			16133137	2.44551e-09	4	4.12068e-07	0.101472	0.328375
Var_089	glycylvaline	Peptide	Dipeptide	2006926		HMDB28854	97417	9.70739e-09	5	1.30856e-06	13.2496	0.427145
Var_084	adenosine	Nucleotide	Purine Metabolism, Adenine containing	54923	C00212	HMDB00050	60961	1.91396e-08	6	2.15001e-06	0.0189344	0.588038
Var_729	taurine	Amino Acid	Methionine, Cysteine, SAM and Taurine Metabolism	1091	C00245	HMDB00251	1123	4.47597e-08	7	4.30972e-06	1.3966	0.0592319
Var_514	guanosine	Nucleotide	Purine Metabolism, Guanine containing	6544	C00387	HMDB00133	6802	8.19e-08	8	6.90007e-06	0.123351	0.441413
Var_092	leucylglycine	Peptide	Dipeptide	71402		HMDB28929	97856	1.71707e-07	9	1.28589e-05	2.97342	0.216888
Var_380	arachidonoylcarnitine (C20:4)	Lipid	Fatty Acid Metabolism(Acyl Carnitine)					3.44818e-07	10	2.32407e-05	1.52196	0.0937738
Var_635	ornithine	Amino Acid	Urea cycle; Arginine and Proline Metabolism	6026	C00077	HMDB03374	6262	4.95768e-07	11	3.03771e-05	1.3093	0.0654214
Var_470	gamma-glutamylglutamine	Peptide	Gamma-glutamyl Amino Acid	133013	C05283	HMDB11738	150914	8.21854e-07	12	4.61608e-05	1.2037	0.0484753
Var_688	serotonin	Amino Acid	Tryptophan Metabolism	5013	C00780	HMDB00259	5202	1.028e-06	13	5.32977e-05	0.717973	0.0811976
Var_265	12-HETE	Lipid	Eicosanoid	21509475		HMDB06111	5312983	1.04108e-06	14	5.01207e-05	2.88065	0.302264
Var_045	14-HDoHE/17-HDoHE	Lipid	Fatty Acid, Monohydroxy					1.26595e-06	15	5.68831e-05	4.00756	0.355359
Var_205	1-arachidonoyl-GPA (20:4)	Lipid	Lysophospholipid					2.04166e-06	16	8.60048e-05	2.78706	0.261604
Var_529	inosine	Nucleotide	Purine Metabolism, (Hypo)Xanthine/Inosine containing	21241953	C00294	HMDB00195	6021	2.14785e-06	17	8.51559e-05	0.169468	0.730943
Var_633	oleoylcarnitine (C18:1)	Lipid	Fatty Acid Metabolism(Acyl Carnitine)	21403150		HMDB05065	6441392	2.22883e-06	18	8.34573e-05	1.23824	0.058686
Var_439	dihomo-linolenoylcarnitine (20:3n3 or 6)*	Lipid	Fatty Acid Metabolism(Acyl Carnitine)					2.7294e-06	19	9.6822e-05	1.36801	0.0855907
Var_522	hypotaurine	Amino Acid	Methionine, Cysteine, SAM and Taurine Metabolism	96959	C00519	HMDB00965	107812	7.2108e-06	20	0.000243004	1.47191	0.120456
Var_715	sphingosine	Lipid	Sphingolipid Metabolism	4510275	C00319	HMDB00252	5353955	8.82357e-06	21	0.000283195	1.47619	0.130719
Var_485	glutamate	Amino Acid	Glutamate Metabolism	591	C00025	HMDB00148	611	8.88548e-06	22	0.000272219	1.552	0.158129
Var_598	N-carbamoylaspartate	Nucleotide	Pyrimidine Metabolism, Orotate containing	4573859	C00438	HMDB00828	93072	9.15204e-06	23	0.000268195	1.5654	0.152711
Var_209	1-arachidonylglycerol (20:4)	Lipid	Monoacylglycerol	4445452	C13857	HMDB11549	5282281	1.18711e-05	24	0.00033338	1.59778	0.172043
Var_537	lactate	Carbohydrate	Glycolysis, Gluconeogenesis, and Pyruvate Metabolism	592	C00186	HMDB00190	612	1.4346e-05	25	0.000386767	1.38738	0.118884
Var_690	sphinganine	Lipid	Sphingolipid Metabolism	3014	C00836	HMDB00269	3126	2.50505e-05	26	0.000649387	1.26803	0.0915924
Var_266	12-HHTrE	Lipid	Eicosanoid	4446265	C20388	HMDB12535	5283141	2.5138e-05	27	0.00062752	1.75223	0.23455
Var_681	S-1-pyrroline-5-carboxylate	Amino Acid	Glutamate Metabolism	10140206	C04322	HMDB01301	1196	3.04633e-05	28	0.000733295	0.678485	0.137881
Var_022	arachidonoyl ethanolamide	Lipid	Endocannabinoid	4445241	C11695	HMDB04080	5281969	5.36965e-05	29	0.00124798	1.57227	0.185857
Var_465	fumarate	Energy	TCA Cycle	10197150	C00122	HMDB00134	444972	5.533e-05	30	0.00124308	1.23076	0.097458
Var_360	ADpSGEGDFXAEGGGVR*	Peptide	Fibrinogen Cleavage Peptide	21403112				6.66939e-05	31	0.00145005	0.592541	0.221413
Var_555	linoleoylcarnitine (C18:2)*	Lipid	Fatty Acid Metabolism(Acyl Carnitine)	4952667		HMDB06469	6450015	8.84963e-05	32	0.00186395	1.28494	0.118599
Var_078	valylglycine	Peptide	Dipeptide	120256		HMDB29127	136487	0.00010297	33	0.00210308	1.74071	0.264185
Var_131	adrenoylcarnitine (C22:4)*	Lipid	Fatty Acid Metabolism(Acyl Carnitine)					0.00013194	34	0.00261551	1.59008	0.211969
Var_523	hypoxanthine	Nucleotide	Purine Metabolism, (Hypo)Xanthine/Inosine containing	768	C00262	HMDB00157	790	0.000152575	35	0.00293815	1.41664	0.158643
Var_087	docosapentaenoylcarnitine (C22:5n3)*	Lipid	Fatty Acid Metabolism(Acyl Carnitine)					0.000165286	36	0.00309453	1.79307	0.277488
Var_670	proline	Amino Acid	Urea cycle; Arginine and Proline Metabolism	128566	C00148	HMDB00162	145742	0.000182955	37	0.00333275	1.03521	0.0174736
Var_441	dihydroorotate	Nucleotide	Pyrimidine Metabolism, Orotate containing	628	C00337	HMDB03349	648	0.000189341	38	0.00335831	1.27804	0.125742
Var_687	serine	Amino Acid	Glycine, Serine and Threonine Metabolism	5736	C00065	HMDB00187	5951	0.000222019	39	0.00383695	1.10707	0.0550826
Var_643	palmitoleoylcarnitine (C16:1)*	Lipid	Fatty Acid Metabolism(Acyl Carnitine)	28639183			71464547	0.000285132	40	0.00480448	1.09084	0.0540446
Var_689	sphingadienine	Lipid	Sphingolipid Metabolism	4952479			6449795	0.000321018	41	0.00527722	1.55916	0.233713
Var_060	isoleucylglycine	Peptide	Dipeptide	303621		HMDB28907	342532	0.000330888	42	0.00530997	2.35962	0.436987
Var_567	methionine sulfoxide	Amino Acid	Methionine, Cysteine, SAM and Taurine Metabolism	139840	C02989	HMDB02005	158980	0.000345567	43	0.00541657	1.23809	0.114461
Var_686	sebacate (decanedioate)	Lipid	Fatty Acid, Dicarboxylate	5004	C08277	HMDB00792	5192	0.000350072	44	0.00536247	1.77911	0.362792
Var_385	asparagine	Amino Acid	Alanine and Aspartate Metabolism	6031	C00152	HMDB00168	6267	0.000355526	45	0.00532499	1.07145	0.0381629
Var_440	dihomo-linoleoylcarnitine (C20:2)*	Lipid	Fatty Acid Metabolism(Acyl Carnitine)					0.000394649	46	0.00578246	1.29626	0.123639
Var_549	linolenoylcarnitine (C18:3)*	Lipid	Fatty Acid Metabolism(Acyl Carnitine)					0.000437159	47	0.00626904	1.28346	0.145099
Var_105	alpha-ketobutyrate	Amino Acid	Methionine, Cysteine, SAM and Taurine Metabolism	2829426	C00109	HMDB00005	58	0.000507491	48	0.00712602	0.670258	0.248806
Var_750	xanthine	Nucleotide	Purine Metabolism, (Hypo)Xanthine/Inosine containing	1151	C00385	HMDB00292	1188	0.0005146	49	0.00707837	1.57241	0.263738
Var_020	adenosine 3',5'-cyclic monophosphate (cAMP)	Nucleotide	Purine Metabolism, Adenine containing	268	C00575	HMDB00058	6076	0.000537884	50	0.00725068	0.650674	0.228481
Var_384	arginine	Amino Acid	Urea cycle; Arginine and Proline Metabolism	227	C00062	HMDB00517	232	0.000577013	51	0.00762562	0.888164	0.0733761
Var_720	stearoyl ethanolamide	Lipid	Endocannabinoid	25958		HMDB13078	27902	0.000968174	52	0.012549	1.26798	0.15755
Var_176	o-cresol sulfate	Xenobiotics	Benzoate Metabolism	9790277			11615528	0.00121059	53	0.015395	1.5535	0.441257
Var_107	azelate (nonanedioate)	Lipid	Fatty Acid, Dicarboxylate	2179	C08261	HMDB00784	2266	0.00137125	54	0.0171152	1.5508	0.29099
Var_247	1-palmitoyl-GPC (16:0)	Lipid	Lysophospholipid	78064		HMDB10382	86554	0.00150172	55	0.0184029	1.09192	0.0601685
Var_363	allantoin	Nucleotide	Purine Metabolism, (Hypo)Xanthine/Inosine containing	199	C02350	HMDB00462	204	0.00158351	56	0.0190587	1.50279	0.31261
Var_736	threonylphenylalanine	Peptide	Dipeptide	3313819		HMDB29068	4099799	0.00162331	57	0.0191949	1.95398	0.504162
Var_352	7-methylguanine	Nucleotide	Purine Metabolism, Guanine containing	10883	C02242	HMDB00897	11361	0.00186773	58	0.0217043	1.06463	0.042071
Var_495	glycine	Amino Acid	Glycine, Serine and Threonine Metabolism	730	C00037	HMDB00123	750	0.00196117	59	0.0224039	1.05089	0.0375733
Var_180	suberate (octanedioate)	Lipid	Fatty Acid, Dicarboxylate	10025	C08278	HMDB00893	10457	0.00207262	60	0.0232824	1.43717	0.275307
Var_717	stearamide	Lipid	Fatty Acid, Amide	29032	C13846	HMDB34146	31292	0.00208514	61	0.0230391	1.62993	0.329651
Var_120	palmitoyl-oleoyl-glycerol (16:0/18:1) [2]*	Lipid	Diacylglycerol		C13861	HMDB07102		0.00215038	62	0.0233767	1.1808	0.134489
Var_165	gamma-glutamylglutamate	Peptide	Gamma-glutamyl Amino Acid	83831	C05282	HMDB11737	92865	0.00227464	63	0.024335	1.32426	0.234603
Var_550	linoleoyl ethanolamide	Lipid	Endocannabinoid	4446566		HMDB12252	5283446	0.00235784	64	0.024831	1.378	0.247366
Var_178	sphingosine 1-phosphate	Lipid	Sphingolipid Metabolism	4446673	C06124	HMDB00277	5283560	0.00243076	65	0.0252051	1.41923	0.255463
Var_413	choline	Lipid	Phospholipid Metabolism	149278	C00114	HMDB00097	305	0.00271966	66	0.0277735	1.21898	0.157838
Var_132	beta-citrylglutamate	Amino Acid	Glutamate Metabolism	19992713	C20775		72715786	0.00368366	67	0.0370565	1.37026	0.267237
Var_232	1-palmitoleoylglycerol (16:1)*	Lipid	Monoacylglycerol			HMDB11565		0.0037551	68	0.0372197	1.24559	0.173911
Var_268	15-HETE	Lipid	Eicosanoid	4444307	C04742	HMDB02110	5280724	0.00378488	69	0.0369711	1.75403	0.416797
Var_575	myristoylcarnitine (C14)	Lipid	Fatty Acid Metabolism(Acyl Carnitine)	4932274		HMDB05066	6426854	0.00448021	70	0.043138	1.07932	0.0766145
Var_327	4-guanidinobutanoate	Amino Acid	Guanidino and Acetamido Metabolism	486	C01035	HMDB03464	500	0.00581583	71	0.0552094	1.16262	0.14696
Var_319	3-sulfo-L-alanine	Amino Acid	Methionine, Cysteine, SAM and Taurine Metabolism	65718	C00506	HMDB02757	72886	0.00588248	72	0.0550666	1.59002	0.357864
Var_656	phenylalanine	Amino Acid	Phenylalanine Metabolism	5910	C00079	HMDB00159	6140	0.00617446	73	0.0570081	1.03969	0.0328931
Var_489	glycerate	Carbohydrate	Glycolysis, Gluconeogenesis, and Pyruvate Metabolism	732	C00258	HMDB00139	752	0.00725002	74	0.066034	1.09148	0.078486
Var_669	pro-hydroxy-pro	Amino Acid	Urea cycle; Arginine and Proline Metabolism	9847785		HMDB06695	11673055	0.0080345	75	0.0722034	1.07994	0.0653279
Var_557	lysine	Amino Acid	Lysine Metabolism	5747	C00047	HMDB00182	5962	0.00865876	76	0.0767895	1.0478	0.041807
Var_278	2-arachidonoylglycerol (20:4)	Lipid	Monoacylglycerol	4445451	C13856	HMDB04666	5282280	0.00995326	77	0.0871234	1.38945	0.397714
Var_613	N1-methylinosine	Nucleotide	Purine Metabolism, (Hypo)Xanthine/Inosine containing	513976		HMDB02721	65095	0.010276	78	0.0887953	1.10754	0.0991142
Var_340	5-oxoproline	Amino Acid	Glutathione Metabolism	7127	C01879	HMDB00267	7405	0.010649	79	0.0908531	1.21683	0.177686
Var_660	phosphoethanolamine	Lipid	Phospholipid Metabolism	990	C00346	HMDB00224	1015	0.011209	80	0.0944358	1.35705	0.354325
Var_649	palmitoylcarnitine (C16)	Lipid	Fatty Acid Metabolism(Acyl Carnitine)	448	C02990	HMDB00222	461	0.0123169	81	0.102489	1.15522	0.14187
Var_542	laurylcarnitine (C12)	Lipid	Fatty Acid Metabolism(Acyl Carnitine)	8602997		HMDB02250	10427569	0.0127863	82	0.105097	1.05601	0.0403494
Var_553	linoleoyl-docosahexaenoyl-glycerol (18:2/22:6) [2]*	Lipid	Diacylglycerol			HMDB07266		0.0141413	83	0.114834	1.16568	0.283622
Var_471	gamma-glutamylglycine	Peptide	Gamma-glutamyl Amino Acid	145071		HMDB11667	165527	0.0163423	84	0.131128	1.06321	0.0593419
Var_725	succinate	Energy	TCA Cycle	1078	C00042	HMDB00254	1110	0.0167066	85	0.132473	1.07158	0.0670862
Var_733	thioproline	Xenobiotics	Chemical	84120			93176	0.016764	86	0.131383	1.08663	0.0823185
Var_250	1-palmitoylglycerol (16:0)	Lipid	Monoacylglycerol	14201		HMDB31074	14900	0.0180686	87	0.13998	1.18092	0.167337
Var_362	alanine	Amino Acid	Alanine and Aspartate Metabolism	5735	C00041	HMDB00161	5950	0.0186022	88	0.142476	1.02979	0.0355762
Var_167	glycerophosphoserine*	Lipid	Phospholipid Metabolism	2339060			3081457	0.0194371	89	0.147198	1.78778	0.757117
Var_563	margaroylcarnitine*	Lipid	Fatty Acid Metabolism(Acyl Carnitine)	35015987		HMDB06210		0.019483	90	0.145906	1.13124	0.129125
Var_139	palmitoyl-linoleoyl-glycerol (16:0/18:2) [1]*	Lipid	Diacylglycerol	7822645		HMDB07103	9543695	0.0209862	91	0.155436	1.52966	0.510019
Var_723	stearoylcarnitine (C18)	Lipid	Fatty Acid Metabolism(Acyl Carnitine)	21233653		HMDB00848	6426855	0.0214023	92	0.156795	1.08071	0.0954985
Var_226	1-myristoylglycerol (14:0)	Lipid	Monoacylglycerol	71382	C01885	HMDB11561	79050	0.0216439	93	0.15686	1.16124	0.195858
Var_570	myo-inositol	Lipid	Inositol Metabolism	10239179	C00137	HMDB00211	892	0.0235658	94	0.168972	1.15638	0.177011
Var_376	arabitol/xylitol	Carbohydrate	Pentose Metabolism		C01904		6912	0.0246341	95	0.174773	1.10123	0.116203
Var_699	sphingomyelin (d18:1/20:0, d16:1/22:0)*	Lipid	Sphingolipid Metabolism	23113477		HMDB12102		0.0248602	96	0.174539	1.03078	0.0352758
Var_159	beta-hydroxyisovalerate	Amino Acid	Leucine, Isoleucine and Valine Metabolism	62571		HMDB00754	69362	0.0252099	97	0.17517	0.824406	0.201435
Var_478	gamma-glutamyltryptophan	Peptide	Gamma-glutamyl Amino Acid	2302065		HMDB29160	3989307	0.0254626	98	0.17512	0.929546	0.0836141
Var_589	N-acetylneuraminate	Carbohydrate	Aminosugar Metabolism	10292217	C00270	HMDB00230	439197	0.0263992	99	0.179728	1.24798	0.250002
Var_260	1-stearoyl-GPC (18:0)	Lipid	Lysophospholipid	435389		HMDB10384	497299	0.0266812	100	0.179831	1.07859	0.0860456
Var_175	N-palmitoylglycine	Lipid	Fatty Acid Metabolism(Acyl Glycine)	133100		HMDB13034	151008	0.0267171	101	0.17829	0.882774	0.13119
Var_461	erythronate*	Carbohydrate	Aminosugar Metabolism	2061231		HMDB00613	2781043	0.027121	102	0.179211	1.08331	0.101062
Var_317	3-methylxanthine	Xenobiotics	Xanthine Metabolism	63805	C16357	HMDB01886	70639	0.0273512	103	0.178978	0.898808	0.094574
Var_619	nicotinamide	Cofactors and Vitamins	Nicotinate and Nicotinamide Metabolism	911	C00153	HMDB01406	936	0.0274934	104	0.178178	1.16365	0.186249
Var_199	1-(1-enyl-palmitoyl)-GPC (P-16:0)*	Lipid	Lysoplasmalogen	9093054		HMDB10407	10917802	0.0276937	105	0.177767	1.14021	0.155163
Var_434	deoxycarnitine	Lipid	Carnitine Metabolism	705	C01181	HMDB01161	134	0.0284577	106	0.180948	1.03011	0.0344947
Var_477	gamma-glutamylthreonine	Peptide	Gamma-glutamyl Amino Acid	21403107		HMDB29159	76078708	0.0285519	107	0.17985	1.0709	0.0697334
Var_566	methionine sulfone	Amino Acid	Methionine, Cysteine, SAM and Taurine Metabolism	63154			69961	0.0291238	108	0.181754	1.08536	0.0813124
Var_474	gamma-glutamylleucine	Peptide	Gamma-glutamyl Amino Acid	133115		HMDB11171	151023	0.0294052	109	0.181827	1.07434	0.0850726
Var_648	palmitoyl-linoleoyl-glycerol (16:0/18:2) [2]*	Lipid	Diacylglycerol			HMDB07103		0.0305221	110	0.187017	1.49886	0.559996
Var_156	9-hydroxystearate	Lipid	Fatty Acid, Monohydroxy	7844595		HMDB61661	9570127	0.0310106	111	0.188299	1.20433	0.336956
Var_676	pyruvate	Carbohydrate	Glycolysis, Gluconeogenesis, and Pyruvate Metabolism	96901	C00022	HMDB00243	1060	0.0312696	112	0.188176	0.873579	0.19269
Var_426	cysteine s-sulfate	Amino Acid	Methionine, Cysteine, SAM and Taurine Metabolism	102939	C05824	HMDB00731	115015	0.0313134	113	0.186772	1.28593	0.287382
Var_117	N-oleoylserine	Lipid	Endocannabinoid	21466990				0.0330899	114	0.195637	1.36291	0.319347
Var_641	palmitic amide	Lipid	Fatty Acid, Amide	62629		HMDB12273	69421	0.0335931	115	0.196885	1.34958	0.361309
Var_516	hexanoylcarnitine (C6)	Lipid	Fatty Acid Metabolism(Acyl Carnitine)	4932273		HMDB00705	6426853	0.0341966	116	0.198694	0.937837	0.0829395
Var_475	gamma-glutamylmethionine	Peptide	Gamma-glutamyl Amino Acid	5373147		HMDB29155	7009567	0.0342566	117	0.197341	1.12319	0.146798
Var_609	N-trimethyl 5-aminovalerate	Amino Acid	Lysine Metabolism	34236878				0.0349574	118	0.199672	1.02876	0.0385843
Var_299	3-hydroxybutyrate (BHBA)	Lipid	Ketone Bodies	428	C01089	HMDB00357	441	0.0364618	119	0.206515	0.913704	0.119871
Var_558	malate	Energy	TCA Cycle	510	C00149	HMDB00156	525	0.0371964	120	0.20892	1.11421	0.204089
Var_632	oleoyl-oleoyl-glycerol (18:1/18:1) [2]*	Lipid	Diacylglycerol			HMDB07218		0.0380929	121	0.212187	1.08302	0.117389
Var_627	oleoyl ethanolamide	Lipid	Endocannabinoid	4446574		HMDB02088	5283454	0.0395948	122	0.218745	1.15512	0.183124
Var_625	oleamide	Lipid	Fatty Acid, Amide	4446508	C19670	HMDB02117	5283387	0.0420353	123	0.23034	1.30039	0.336192
Var_300	3-hydroxydecanoate	Lipid	Fatty Acid, Monohydroxy	24790		HMDB02203	26612	0.0425235	124	0.231136	1.07888	0.0568024
Var_480	gamma-glutamylvaline	Peptide	Gamma-glutamyl Amino Acid			HMDB11172	7015683	0.0450679	125	0.243006	1.08801	0.0981875
Var_149	2-hydroxyoctanoate	Lipid	Fatty Acid, Monohydroxy	84994		HMDB02264	94180	0.0452255	126	0.241921	1.13225	0.200491
Var_751	xanthurenate	Amino Acid	Tryptophan Metabolism	5497	C02470	HMDB00881	5699	0.0458555	127	0.243359	1.08146	0.117391
Var_110	docosahexaenoylcarnitine (C22:6)*	Lipid	Fatty Acid Metabolism(Acyl Carnitine)					0.0468128	128	0.246498	1.21151	0.251321
Var_728	tartronate (hydroxymalonate)	Xenobiotics	Bacterial/Fungal	44	C02287	HMDB35227	45	0.0486227	129	0.254044	0.856926	0.227483
Var_179	stearoyl-arachidonoyl-glycerol (18:0/20:4) [2]*	Lipid	Diacylglycerol					0.0507635	130	0.263189	1.34121	0.50909
Var_678	retinol (Vitamin A)	Cofactors and Vitamins	Vitamin A Metabolism	393012	C00473	HMDB00305	445354	0.0517167	131	0.266084	1.04043	0.0552426
Var_297	3-hydroxy-2-ethylpropionate	Amino Acid	Leucine, Isoleucine and Valine Metabolism	164207		HMDB00396	188979	0.0517857	132	0.264421	1.05991	0.0929265
Var_410	cerotoylcarnitine (C26)*	Lipid	Fatty Acid Metabolism(Acyl Carnitine)	35015992		HMDB06347		0.0518293	133	0.262654	1.06043	0.078552
Var_210	1-dihomo-linolenylglycerol (20:3)	Lipid	Monoacylglycerol					0.0588334	134	0.295923	1.13538	0.199397
Var_722	stearoyl-arachidonoyl-glycerol (18:0/20:4) [1]*	Lipid	Diacylglycerol					0.0595056	135	0.297087	1.10932	0.128295
Var_227	1-oleoyl-2-docosahexaenoyl-GPC (18:1/22:6)*	Lipid	Phosphatidylcholine (PC)	24766785		HMDB08123		0.0630953	136	0.312693	0.945125	0.0731099
Var_228	1-oleoyl-GPC (18:1)	Lipid	Lysophospholipid	17240641		HMDB02815	16081932	0.0639503	137	0.314617	1.0474	0.0666414
Var_330	4-hydroxyphenylpyruvate	Amino Acid	Tyrosine Metabolism	954	C01179	HMDB00707	979	0.0701684	138	0.342707	0.814952	0.294891
Var_630	oleoyl-linoleoyl-glycerol (18:1/18:2) [2]	Lipid	Diacylglycerol	29788004		HMDB07219		0.0704857	139	0.34178	1.05702	0.125592
Var_256	1-stearoyl-2-linoleoyl-GPE (18:0/18:2)*	Lipid	Phosphatidylethanolamine (PE)	7825699		HMDB08994	9546749	0.0710965	140	0.342279	0.958058	0.123872
Var_615	N6,N6,N6-trimethyllysine	Amino Acid	Lysine Metabolism	140379	C03793	HMDB01325	440120	0.0712518	141	0.340594	1.04545	0.0899245
Var_298	3-hydroxy-3-methylglutarate	Lipid	Mevalonate Metabolism	4573695	C03761	HMDB00355	1662	0.0742391	142	0.352374	1.0951	0.159824
Var_460	erythritol	Xenobiotics	Food Component/Plant	13835932	C00503	HMDB02994	222285	0.0748684	143	0.352876	1.06432	0.0995216
Var_614	N2,N2-dimethylguanosine	Nucleotide	Purine Metabolism, Guanine containing	83878		HMDB04824	92919	0.077031	144	0.360548	1.06891	0.105268
Var_354	acetoacetate	Lipid	Ketone Bodies	94	C00164	HMDB00060	96	0.077929	145	0.362235	0.792231	0.275932
Var_692	sphingomyelin (d17:2/16:0, d18:2/15:0)*	Lipid	Sphingolipid Metabolism					0.0786568	146	0.363114	1.06683	0.0959028
Var_503	glycohyocholate	Lipid	Secondary Bile Acid Metabolism					0.0789037	147	0.361776	0.895963	0.164396
Var_583	N-acetylglutamate	Amino Acid	Glutamate Metabolism	1266066	C00624	HMDB01138	70914	0.0804844	148	0.36653	1.07763	0.122359
Var_402	carnitine	Lipid	Carnitine Metabolism	10455	C00318	HMDB00062	10917	0.0809025	149	0.365962	0.981331	0.0304708
Var_230	1-oleoylglycerol (18:1)	Lipid	Monoacylglycerol	4446588		HMDB11567	5283468	0.0817822	150	0.367475	1.17419	0.237623
Var_103	2-hydroxyadipate	Lipid	Fatty Acid, Dicarboxylate	167943	C02360	HMDB00321	193530	0.082269	151	0.367214	0.715837	0.527911
Var_382	arachidoylcarnitine (C20)*	Lipid	Fatty Acid Metabolism(Acyl Carnitine)	28639199		HMDB06460		0.0824342	152	0.36553	1.11613	0.127319
Var_655	phenylacetylglutamine	Peptide	Acetylated Peptides	270643	C04148	HMDB06344	92258	0.0841413	153	0.370662	1.02652	0.063641
Var_200	1-(1-enyl-palmitoyl)-GPE (P-16:0)*	Lipid	Lysoplasmalogen	10471193				0.0853903	154	0.373721	1.22412	0.351509
Var_216	1-linoleoyl-GPA (18:2)*	Lipid	Lysophospholipid	24766514		HMDB07856		0.0856898	155	0.372613	1.24939	0.398615
Var_088	eicosapentaenoylcholine	Lipid	Fatty Acid Metabolism (Acyl Choline)					0.0892458	156	0.385588	1.14074	0.294361
Var_546	linoleamide (18:2n6)	Lipid	Fatty Acid, Amide	4940587			6435901	0.090146	157	0.386996	1.25344	0.3128
Var_420	cortisol	Lipid	Corticosteroids		C00735	HMDB00063	5754	0.0913435	158	0.389655	0.927009	0.146075
Var_415	cinnamoylglycine	Xenobiotics	Food Component/Plant	618829		HMDB11621	709625	0.0914483	159	0.387649	0.898058	0.233257
Var_743	tryptophan	Amino Acid	Tryptophan Metabolism	6066	C00078	HMDB00929	6305	0.0932899	160	0.392984	1.02307	0.0379135
Var_305	3-hydroxyoctanoate	Lipid	Fatty Acid, Monohydroxy	24791		HMDB01954	26613	0.0989249	161	0.414133	1.02356	0.133414
Var_591	N-acetylproline	Amino Acid	Urea cycle; Arginine and Proline Metabolism	285677			322640	0.100389	162	0.417668	1.10768	0.175209
Var_425	cysteine	Amino Acid	Methionine, Cysteine, SAM and Taurine Metabolism	5653	C00097	HMDB00574	5862	0.101652	163	0.420326	0.929516	0.139263
Var_314	3-methylglutarate/2-methylglutarate	Lipid	Fatty Acid, Dicarboxylate	11781		HMDB00752		0.101996	164	0.419181	0.758667	0.304657
Var_663	piperine	Xenobiotics	Food Component/Plant	553590	C03882	HMDB29377	638024	0.112055	165	0.457728	1.01545	0.0527572
Var_142	ursodeoxycholate	Lipid	Secondary Bile Acid Metabolism	29131	C07880	HMDB00946	31401	0.114022	166	0.462957	0.830518	0.274551
Var_430	cystine	Amino Acid	Methionine, Cysteine, SAM and Taurine Metabolism	575	C00491	HMDB00192	67678	0.114616	167	0.462583	0.909424	0.183353
Var_222	1-methylimidazoleacetate	Amino Acid	Histidine Metabolism	68319	C05828	HMDB02820	75810	0.115148	168	0.461962	1.03317	0.0658575
Var_160	caffeic acid sulfate	Xenobiotics	Xanthine Metabolism	30777608		HMDB41708		0.115427	169	0.460342	1.04794	0.257276
Var_646	palmitoyl ethanolamide	Lipid	Endocannabinoid	4509	C16512	HMDB02100	4671	0.116737	170	0.462828	1.12054	0.231749
Var_173	N-acetyl-beta-alanine	Nucleotide	Pyrimidine Metabolism, Uracil containing	68881	C01073		76406	0.11754	171	0.463287	0.81049	0.344871
Var_487	glutarate (pentanedioate)	Lipid	Fatty Acid, Dicarboxylate	3618533	C00489	HMDB00661	743	0.118395	172	0.463942	1.07928	0.161522
Var_594	N-acetyltaurine	Amino Acid	Methionine, Cysteine, SAM and Taurine Metabolism	140553			159864	0.126154	173	0.491489	1.17613	0.312356
Var_281	2-hydroxydecanoate	Lipid	Fatty Acid, Monohydroxy	20195			21488	0.129246	174	0.500641	1.03585	0.0771815
Var_155	5-acetylamino-6-formylamino-3-methyluracil	Xenobiotics	Xanthine Metabolism	97287	C16365	HMDB11105	108214	0.133244	175	0.513181	1.11933	0.314034
Var_483	glucose	Carbohydrate	Glycolysis, Gluconeogenesis, and Pyruvate Metabolism	71358	C00031	HMDB00122	79025	0.136205	176	0.521603	0.966201	0.0647704
Var_344	5alpha-androstan-3alpha,17beta-diol monosulfate (2)	Lipid	Androgenic Steroids					0.137242	177	0.522605	0.939913	0.156508
Var_394	bilirubin (E,Z or Z,E)*	Cofactors and Vitamins	Hemoglobin and Porphyrin Metabolism	4705847		HMDB00488	5799469	0.137893	178	0.522133	1.06303	0.110049
Var_083	3b-hydroxy-5-cholenoic acid	Lipid	Secondary Bile Acid Metabolism	83950		HMDB00308	92997	0.138752	179	0.522452	0.886557	0.195519
Var_685	sarcosine	Amino Acid	Glycine, Serine and Threonine Metabolism	1057	C00213	HMDB00271	1088	0.138946	180	0.520276	0.981294	0.05089
Var_490	glycerol	Lipid	Glycerolipid Metabolism	733	C00116	HMDB00131	753	0.139051	181	0.517791	0.929304	0.164481
Var_703	sphingomyelin (d18:1/22:1, d18:2/22:0, d16:1/24:1)*	Lipid	Sphingolipid Metabolism	29368329		HMDB12104		0.14043	182	0.520056	1.01726	0.0330175
Var_662	pipecolate	Amino Acid	Lysine Metabolism	826	C00408	HMDB00070	849	0.140867	183	0.51882	1.02998	0.0497894
Var_133	hexanoylglutamine	Lipid	Fatty Acid Metabolism (Acyl Glutamine)					0.142026	184	0.520249	0.789275	0.319913
Var_456	eicosenoylcarnitine (C20:1)*	Lipid	Fatty Acid Metabolism(Acyl Carnitine)					0.143529	185	0.522913	1.07415	0.145894
Var_604	N-palmitoyl-sphingadienine (d18:2/16:0)*	Lipid	Sphingolipid Metabolism					0.148781	186	0.539132	1.04035	0.0734854
Var_629	oleoyl-linoleoyl-glycerol (18:1/18:2) [1]	Lipid	Diacylglycerol	23975985		HMDB07219		0.151481	187	0.545981	1.05862	0.113184
Var_564	mead acid (20:3n9)	Lipid	Polyunsaturated Fatty Acid (n3 and n6)	4471956		HMDB10378	5312531	0.154428	188	0.55364	1.14021	0.286911
Var_428	cysteine-glutathione disulfide	Amino Acid	Glutathione Metabolism	3455404		HMDB00656	4247235	0.158083	189	0.563747	1.11195	0.162559
Var_137	N-acetylglucosaminylasparagine	Carbohydrate	Aminosugar Metabolism	21403014	C04540	HMDB00489	123826	0.160614	190	0.569756	1.21378	0.246985
Var_552	linoleoyl-arachidonoyl-glycerol (18:2/20:4) [2]*	Lipid	Diacylglycerol			HMDB07257		0.163017	191	0.575253	0.917824	0.132082
Var_246	1-palmitoyl-GPA (16:0)	Lipid	Lysophospholipid	4925335	C04036	HMDB00327	6419701	0.165351	192	0.580452	1.27182	0.507775
Var_331	4-methyl-2-oxopentanoate	Amino Acid	Leucine, Isoleucine and Valine Metabolism	69	C00233	HMDB00695	70	0.167168	193	0.583788	0.941004	0.141274
Var_147	2,3-dihydroxyisovalerate	Xenobiotics	Food Component/Plant	657	C04039	HMDB12141	677	0.168789	194	0.586411	1.06377	0.103352
Var_679	ribitol	Carbohydrate	Pentose Metabolism	10254628	C00474	HMDB00508	6912	0.171713	195	0.593511	1.15692	0.276557
Var_532	isoleucine	Amino Acid	Leucine, Isoleucine and Valine Metabolism	769	C00407	HMDB00172	6306	0.175955	196	0.605068	1.02324	0.0441851
Var_491	glycerol 3-phosphate	Lipid	Glycerolipid Metabolism	734	C00093	HMDB00126	754	0.179448	197	0.61395	1.30043	0.623068
Var_182	taurochenodeoxycholate	Lipid	Primary Bile Acid Metabolism	343282	C05465	HMDB00951	387316	0.180487	198	0.614385	1.01327	0.142784
Var_636	orotate	Nucleotide	Pyrimidine Metabolism, Orotate containing	942	C00295	HMDB00226	967	0.182015	199	0.616474	1.08227	0.249109
Var_369	androstenediol (3alpha, 17alpha) monosulfate (2)	Lipid	Androgenic Steroids					0.18396	200	0.619947	0.882907	0.220477
Var_144	1-docosahexaenoylglycerol (22:6)	Lipid	Monoacylglycerol	10477810		HMDB11587		0.186343	201	0.624851	1.20413	0.344872
Var_535	kynurenate	Amino Acid	Tryptophan Metabolism	3712	C01717	HMDB00715	3845	0.187464	202	0.625499	0.935001	0.130511
Var_399	caffeine	Xenobiotics	Xanthine Metabolism	2424	C07481	HMDB01847	2519	0.188491	203	0.625828	0.999209	0.187769
Var_082	2-methylcitrate/homocitrate	Energy	TCA Cycle					0.190952	204	0.630889	0.863049	0.338693
Var_539	lactosyl-N-nervonoyl-sphingosine (d18:1/24:1)*	Lipid	Ceramides	24846896				0.196757	205	0.646899	1.04072	0.0685466
Var_732	theophylline	Xenobiotics	Xanthine Metabolism	2068	C07130	HMDB01889	2153	0.197537	206	0.646312	0.996532	0.171437
Var_534	isovalerylcarnitine (C5)	Amino Acid	Leucine, Isoleucine and Valine Metabolism	4932271		HMDB00688	6426851	0.198637	207	0.646769	1.0348	0.0793684
Var_231	1-palmitoleoyl-GPC (16:1)*	Lipid	Lysophospholipid	21403152		HMDB10383	24779461	0.200032	208	0.648181	1.05043	0.100443
Var_647	palmitoyl sphingomyelin (d18:1/16:0)	Lipid	Sphingolipid Metabolism	8115562			9939941	0.200673	209	0.647145	1.02448	0.0460511
Var_220	1-linoleoylglycerol (18:2)	Lipid	Monoacylglycerol	4446589			5283469	0.204467	210	0.656243	1.11083	0.191564
Var_637	orotidine	Nucleotide	Pyrimidine Metabolism, Orotate containing	83729		HMDB00788	92751	0.204577	211	0.653481	1.12583	0.225185
Var_236	1-palmitoyl-2-docosahexaenoyl-GPC (16:0/22:6)	Lipid	Phosphatidylcholine (PC)	4946007		HMDB07991	6441886	0.207391	212	0.659348	0.976875	0.052781
Var_373	androstenediol (3beta,17beta) monosulfate (1)	Lipid	Androgenic Steroids			HMDB03818	13847309	0.209037	213	0.66146	0.843526	0.234923
Var_462	ethylmalonate	Amino Acid	Leucine, Isoleucine and Valine Metabolism	11263		HMDB00622	11756	0.209124	214	0.658644	1.03526	0.103942
Var_610	N1-Methyl-2-pyridone-5-carboxamide	Cofactors and Vitamins	Nicotinate and Nicotinamide Metabolism	62899	C05842	HMDB04193	69698	0.210773	215	0.66075	0.930433	0.117642
Var_086	benzoate	Xenobiotics	Benzoate Metabolism	238	C00180	HMDB01870	243	0.212939	216	0.664449	1.21991	0.402234
Var_494	glycerophosphorylcholine (GPC)	Lipid	Phospholipid Metabolism	571409	C00670	HMDB00086	71920	0.214444	217	0.666061	1.53492	0.658778
Var_468	gamma-glutamyl-alpha-lysine	Peptide	Gamma-glutamyl Amino Acid	58747			65254	0.214787	218	0.664065	1.06668	0.130574
Var_579	N-acetylasparagine	Amino Acid	Alanine and Aspartate Metabolism	90090		HMDB06028	99715	0.221521	219	0.681758	0.885891	0.223709
Var_150	2-keto-3-deoxy-gluconate	Xenobiotics	Food Component/Plant	141630	C00204	HMDB01353	161227	0.223686	220	0.685294	1.11621	0.375482
Var_371	androstenediol (3beta,17beta) disulfate (1)	Lipid	Androgenic Steroids		C04295	HMDB03818	87120982	0.226414	221	0.690513	0.840977	0.201101
Var_492	glycerophosphoethanolamine	Lipid	Phospholipid Metabolism	110410	C01233	HMDB00114	123874	0.226808	222	0.688597	1.09819	0.196438
Var_724	stearoylcholine*	Lipid	Fatty Acid Metabolism (Acyl Choline)					0.228282	223	0.689964	1.07973	0.17875
Var_580	N-acetylaspartate (NAA)	Amino Acid	Alanine and Aspartate Metabolism	58576	C01042	HMDB00812	65065	0.232394	224	0.699258	1.06851	0.167044
Var_638	oxalate (ethanedioate)	Cofactors and Vitamins	Ascorbate and Aldarate Metabolism	946	C00209	HMDB02329	971	0.234165	225	0.701454	0.892188	0.329308
Var_666	pregnen-diol disulfate C21H34O8S2*	Lipid	Progestin Steroids					0.234764	226	0.700137	0.927033	0.159241
Var_145	1-stearoyl-GPI (18:0)	Lipid	Lysophospholipid	21403067		HMDB61696		0.236864	227	0.703288	0.865849	0.46954
Var_135	linoleoyl-linolenoyl-glycerol (18:2/18:3) [2]*	Lipid	Diacylglycerol			HMDB07250		0.237176	228	0.701126	1.13884	0.302522
Var_623	octadecanedioate	Lipid	Fatty Acid, Dicarboxylate	63283		HMDB00782	70095	0.23853	229	0.702049	0.974193	0.272405
Var_702	sphingomyelin (d18:1/21:0, d17:1/22:0, d16:1/23:0)*	Lipid	Sphingolipid Metabolism					0.239924	230	0.70308	0.967353	0.0707545
Var_401	caprylate (8:0)	Lipid	Medium Chain Fatty Acid	370	C06423	HMDB00482	379	0.240318	231	0.701186	1.01419	0.140228
Var_292	2-stearoyl-GPE (18:0)*	Lipid	Lysophospholipid	24769218		HMDB11129		0.241661	232	0.702067	1.08398	0.252665
Var_540	lactosyl-N-palmitoyl-sphingosine (d18:1/16:0)	Lipid	Ceramides					0.24181	233	0.699484	1.02579	0.0735965
Var_561	mannose	Carbohydrate	Fructose, Mannose and Galactose Metabolism	141983	C00159	HMDB00169	18950	0.241901	234	0.696759	0.940539	0.132248
Var_543	leucine	Amino Acid	Leucine, Isoleucine and Valine Metabolism	5880	C00123	HMDB00687	6106	0.245695	235	0.704675	1.02243	0.0508565
Var_208	1-arachidonoyl-GPI (20:4)*	Lipid	Lysophospholipid			HMDB61690		0.246492	236	0.703964	1.08908	0.224783
Var_263	10-nonadecenoate (19:1n9)	Lipid	Long Chain Fatty Acid	4471938		HMDB13622	5312513	0.246618	237	0.701351	1.10147	0.16925
Var_572	myristoleate (14:1n5)	Lipid	Long Chain Fatty Acid	4444564	C08322	HMDB02000	5281119	0.247424	238	0.700687	1.08046	0.277114
Var_726	succinylcarnitine (C4-DC)	Energy	TCA Cycle	28639166		HMDB61717	71464481	0.249843	239	0.704579	0.933802	0.151283
Var_329	4-hydroxyhippurate	Xenobiotics	Benzoate Metabolism	133104		HMDB13678	151012	0.252453	240	0.708971	0.883639	0.26944
Var_621	O-methylcatechol sulfate	Xenobiotics	Benzoate Metabolism	21078		HMDB60013	22473	0.254385	241	0.711433	0.945502	0.158224
Var_510	glycosyl-N-stearoyl-sphingosine (d18:1/18:0)	Lipid	Ceramides					0.25456	242	0.70898	1.04676	0.100533
Var_286	2-isopropylmalate	Xenobiotics	Food Component/Plant	76	C02504	HMDB00402	77	0.255863	243	0.709678	0.931751	0.313168
Var_531	isocitrate	Energy	TCA Cycle	1161	C00311	HMDB00193	1198	0.255956	244	0.707026	0.928097	0.14606
Var_337	5-dodecenoate (12:1n7)	Lipid	Medium Chain Fatty Acid	4471803		HMDB00529	5312378	0.256736	245	0.706285	1.04964	0.120162
Var_335	5-acetylamino-6-amino-3-methyluracil	Xenobiotics	Xanthine Metabolism	79659	C16366	HMDB04400	88299	0.256773	246	0.703517	1.16752	0.212045
Var_442	dimethyl sulfoxide (DMSO)	Xenobiotics	Chemical	659	C11143	HMDB02151	679	0.257723	247	0.70326	1.13621	0.236274
Var_186	1,2,3-benzenetriol sulfate (2)	Xenobiotics	Chemical					0.262084	248	0.712276	0.890254	0.238353
Var_296	3-carboxy-4-methyl-5-propyl-2-furanpropanoate (CMPF)	Lipid	Fatty Acid, Dicarboxylate	110498		HMDB61112	123979	0.262166	249	0.709639	0.927896	0.357285
Var_345	5alpha-androstan-3beta,17beta-diol disulfate	Lipid	Androgenic Steroids		C12525	HMDB00493	242332	0.262806	250	0.708524	0.891969	0.189767
Var_151	2-methylbutyrylglycine	Amino Acid	Leucine, Isoleucine and Valine Metabolism	168243		HMDB00339	193872	0.263682	251	0.708055	0.826959	0.354033
Var_727	sulfate*	Xenobiotics	Chemical	1086	C00059	HMDB01448	1118	0.263835	252	0.705654	0.934525	0.152534
Var_313	3-methylglutaconate	Amino Acid	Leucine, Isoleucine and Valine Metabolism	1267861		HMDB00522	1551553	0.264165	253	0.703744	1.02509	0.0422739
Var_422	creatine	Amino Acid	Creatine Metabolism	566	C00300	HMDB00064	586	0.264967	254	0.703101	1.02416	0.0654301
Var_140	paraxanthine	Xenobiotics	Xanthine Metabolism	4525	C13747	HMDB01860	4687	0.266085	255	0.7033	0.909407	0.182324
Var_599	N-formylmethionine	Amino Acid	Methionine, Cysteine, SAM and Taurine Metabolism	388809	C03145	HMDB01015	439750	0.266219	256	0.700903	0.946841	0.12453
Var_315	3-methylglutarylcarnitine (2)	Amino Acid	Leucine, Isoleucine and Valine Metabolism	113619		HMDB00552	128145	0.266272	257	0.698317	0.969389	0.178633
Var_390	beta-alanine	Nucleotide	Pyrimidine Metabolism, Uracil containing	234	C00099	HMDB00056	239	0.268687	258	0.70192	1.07418	0.205289
Var_177	spermidine	Amino Acid	Polyamine Metabolism	1071	C00315	HMDB01257	1102	0.271595	259	0.706777	1.07139	0.206705
Var_379	arachidonate (20:4n6)	Lipid	Polyunsaturated Fatty Acid (n3 and n6)	392692	C00219	HMDB01043	444899	0.276343	260	0.716365	1.15791	0.430761
Var_617	N6-carbamoylthreonyladenosine	Nucleotide	Purine Metabolism, Adenine containing	141829		HMDB41623	161466	0.276596	261	0.714275	0.938168	0.146999
Var_560	mannitol/sorbitol	Carbohydrate	Fructose, Mannose and Galactose Metabolism	440	C00794	HMDB00247	5780	0.279438	262	0.71886	1.04572	0.304478
Var_395	bilirubin (Z,Z)	Cofactors and Vitamins	Hemoglobin and Porphyrin Metabolism	4444055	C00486	HMDB00054	5280352	0.27961	263	0.716567	1.03097	0.0665585
Var_190	1-(1-enyl-oleoyl)-GPE (P-18:1)*	Lipid	Lysoplasmalogen					0.280875	264	0.717082	1.2552	0.573395
Var_640	palmitate (16:0)	Lipid	Long Chain Fatty Acid	960	C00249	HMDB00220	985	0.283829	265	0.721888	1.02615	0.134734
Var_716	stachydrine	Xenobiotics	Food Component/Plant	103115	C10172	HMDB04827	115244	0.285157	266	0.722542	1.0314	0.19944
Var_348	5alpha-pregnan-3beta,20alpha-diol monosulfate (2)	Lipid	Progestin Steroids					0.286754	267	0.723865	1.10712	0.302157
Var_738	trans-4-hydroxyproline	Amino Acid	Urea cycle; Arginine and Proline Metabolism	5605	C01157	HMDB00725	5810	0.290024	268	0.729388	1.02313	0.047017
Var_624	octanoylcarnitine (C8)	Lipid	Fatty Acid Metabolism(Acyl Carnitine)	110274	C02838	HMDB00791	123701	0.292045	269	0.731742	1.02793	0.0706508
Var_713	sphingomyelin (d18:2/24:1, d18:1/24:2)*	Lipid	Sphingolipid Metabolism					0.293981	270	0.733863	1.01239	0.0423293
Var_375	androsterone sulfate	Lipid	Androgenic Steroids	19988780		HMDB02759	159663	0.295865	271	0.73584	0.888904	0.232164
Var_125	1-methylurate	Xenobiotics	Xanthine Metabolism	62926	C16359	HMDB03099	69726	0.297045	272	0.73606	0.8712	0.18698
Var_464	fructose	Carbohydrate	Fructose, Mannose and Galactose Metabolism	5764	C00095	HMDB00660	5984	0.297923	273	0.73553	0.938374	0.150903
Var_261	1-stearoyl-GPE (18:0)	Lipid	Lysophospholipid	7826018		HMDB11130	9547068	0.298706	274	0.734774	1.07173	0.203802
Var_667	pregnenolone sulfate	Lipid	Pregnenolone Steroids	94802		HMDB00774	105074	0.300353	275	0.736137	0.973675	0.0910661
Var_310	3-methyl-2-oxobutyrate	Amino Acid	Leucine, Isoleucine and Valine Metabolism	48	C00141	HMDB00019	49	0.302405	276	0.738482	0.95148	0.158589
Var_665	pregnanediol-3-glucuronide	Lipid	Progestin Steroids	110346		HMDB10318	123796	0.305747	277	0.743947	0.953232	0.160415
Var_405	catechol sulfate	Xenobiotics	Benzoate Metabolism	2341024		HMDB59724	3083879	0.306201	278	0.742373	0.871461	0.219377
Var_447	docosahexaenoylcholine	Lipid	Fatty Acid Metabolism (Acyl Choline)					0.306616	279	0.740713	1.04619	0.246141
Var_524	imidazole lactate	Amino Acid	Histidine Metabolism	389128	C05568	HMDB02320	440129	0.307697	280	0.74067	1.01918	0.0469029
Var_488	glutarylcarnitine (C5-DC)	Amino Acid	Lysine Metabolism	21403175		HMDB13130	71464488	0.310436	281	0.744603	0.925993	0.241652
Var_214	1-linoleoyl-2-arachidonoyl-GPC (18:2/20:4n6)*	Lipid	Phosphatidylcholine (PC)	24766809		HMDB08147		0.312396	282	0.746648	1.03031	0.078927
Var_612	N1-methyladenosine	Nucleotide	Purine Metabolism, Adenine containing	4573813	C02494	HMDB03331	27476	0.313067	283	0.745607	1.03763	0.0952754
Var_339	5-methyluridine (ribothymidine)	Nucleotide	Pyrimidine Metabolism, Uracil containing	393058		HMDB00884	445408	0.314394	284	0.746132	0.875613	0.431426
Var_616	N6-acetyllysine	Amino Acid	Lysine Metabolism	83801	C02727	HMDB00206	92832	0.316818	285	0.749246	1.10249	0.245095
Var_254	1-stearoyl-2-docosahexaenoyl-GPC (18:0/22:6)	Lipid	Phosphatidylcholine (PC)			HMDB08057		0.318739	286	0.751154	1.0384	0.0834113
Var_212	1-linolenoyl-GPC (18:3)*	Lipid	Lysophospholipid			HMDB10388		0.319112	287	0.749412	1.07624	0.171
Var_307	3-indoxyl sulfate	Amino Acid	Tryptophan Metabolism	9840		HMDB00682	10258	0.321593	288	0.752616	0.909609	0.191662
Var_424	cys-gly, oxidized	Amino Acid	Glutathione Metabolism	295316			333293	0.321805	289	0.750506	1.09615	0.324135
Var_374	androstenediol (3beta,17beta) monosulfate (2)	Lipid	Androgenic Steroids					0.323668	290	0.75225	0.908856	0.161589
Var_111	gulonate*	Cofactors and Vitamins	Ascorbate and Aldarate Metabolism	7969943	C00257	HMDB03290	9794176	0.325825	291	0.75466	1.08967	0.25492
Var_582	N-acetylglucosamine/N-acetylgalactosamine	Carbohydrate	Aminosugar Metabolism			HMDB00215	24139	0.328304	292	0.757798	0.978712	0.0954297
Var_565	methionine	Amino Acid	Methionine, Cysteine, SAM and Taurine Metabolism	5907	C00073	HMDB00696	6137	0.328653	293	0.756013	1.01263	0.035605
Var_273	2-aminoadipate	Amino Acid	Lysine Metabolism	456	C00956	HMDB00510	469	0.335395	294	0.768898	1.07201	0.194527
Var_746	urate	Nucleotide	Purine Metabolism, (Hypo)Xanthine/Inosine containing		C00366	HMDB00289	1175	0.335968	295	0.767602	0.939339	0.134516
Var_191	1-(1-enyl-palmitoyl)-2-arachidonoyl-GPC (P-16:0/20:4)*	Lipid	Plasmalogen	24767495		HMDB11220		0.336958	296	0.767263	1.02008	0.0455683
Var_341	5alpha-androstan-3alpha,17alpha-diol monosulfate	Lipid	Androgenic Steroids					0.337505	297	0.76592	0.921126	0.200171
Var_355	acetylcarnitine (C2)	Lipid	Fatty Acid Metabolism(Acyl Carnitine)	5406074	C02571	HMDB00201	1	0.339295	298	0.7674	0.921251	0.256066
Var_237	1-palmitoyl-2-docosahexaenoyl-GPE (16:0/22:6)*	Lipid	Phosphatidylethanolamine (PE)	7825749		HMDB05324	9546799	0.33982	299	0.766015	1.09951	0.257032
Var_336	5-bromotryptophan	Amino Acid	Tryptophan Metabolism	87339			96735	0.339866	300	0.763565	0.899557	0.27774
Var_393	bilirubin (E,E)*	Cofactors and Vitamins	Hemoglobin and Porphyrin Metabolism	4474753			5315454	0.340055	301	0.761452	1.11884	0.264805
Var_309	3-methoxytyrosine	Amino Acid	Tyrosine Metabolism	8948		HMDB01434	1670	0.340532	302	0.759995	0.972756	0.102113
Var_211	1-lignoceroyl-GPC (24:0)	Lipid	Lysophospholipid	24766539		HMDB10405		0.34083	303	0.75815	1.06015	0.195982
Var_400	caprate (10:0)	Lipid	Medium Chain Fatty Acid	2863	C01571	HMDB00511	2969	0.342966	304	0.760391	1.02788	0.0655116
Var_607	N-stearoyl-sphingadienine (d18:2/18:0)*	Lipid	Ceramides					0.344083	305	0.760368	1.07997	0.288554
Var_174	N-delta-acetylornithine	Amino Acid	Urea cycle; Arginine and Proline Metabolism	8096135			9920500	0.344205	306	0.758151	0.936001	0.249916
Var_378	arachidate (20:0)	Lipid	Long Chain Fatty Acid	10035	C06425	HMDB02212	10467	0.344481	307	0.756288	1.0572	0.247636
Var_576	N-acetyl-aspartyl-glutamate (NAAG)	Amino Acid	Glutamate Metabolism	5065	C12270	HMDB01067	5255	0.344581	308	0.754051	0.875416	0.481408
Var_308	3-methoxycatechol sulfate (1)	Xenobiotics	Benzoate Metabolism					0.344981	309	0.752482	0.941118	0.126142
Var_351	7-alpha-hydroxy-3-oxo-4-cholestenoate (7-Hoca)	Lipid	Sterol	2338765	C17337	HMDB12458	3081085	0.34703	310	0.754511	0.945846	0.176658
Var_124	1,7-dimethylurate	Xenobiotics	Xanthine Metabolism	82720	C16356	HMDB11103	91611	0.355459	311	0.770352	0.927351	0.25441
Var_653	perfluorooctanesulfonic acid (PFOS)	Xenobiotics	Chemical	67068	C18142	HMDB59586	74483	0.356197	312	0.769477	0.992771	0.0720128
Var_130	7-methylurate	Xenobiotics	Xanthine Metabolism	62375	C16355	HMDB11107	69160	0.357358	313	0.769517	0.783711	0.291742
Var_608	N-stearoyl-sphingosine (d18:1/18:0)*	Lipid	Ceramides	4446678		HMDB04950	5283565	0.36111	314	0.775121	1.01384	0.0907257
Var_611	N1-Methyl-4-pyridone-3-carboxamide	Cofactors and Vitamins	Nicotinate and Nicotinamide Metabolism	389671	C05843	HMDB04194	440810	0.364136	315	0.779136	1.05873	0.332226
Var_458	ergothioneine	Xenobiotics	Food Component/Plant	2297320	C05570	HMDB03045	3032311	0.364462	316	0.777364	0.978906	0.103737
Var_370	androstenediol (3alpha, 17alpha) monosulfate (3)	Lipid	Androgenic Steroids					0.364475	317	0.77494	0.94285	0.154002
Var_407	ceramide (d18:1/14:0, d16:1/16:0)*	Lipid	Ceramides					0.365165	318	0.773967	1.05215	0.130951
Var_697	sphingomyelin (d18:1/18:1, d18:2/18:0)	Lipid	Sphingolipid Metabolism	4947837		HMDB12101	6443882	0.365375	319	0.771984	1.01271	0.0419057
Var_184	taurolithocholate 3-sulfate	Lipid	Secondary Bile Acid Metabolism	389078	C03642	HMDB02580	440071	0.365568	320	0.769978	1.04145	0.22999
Var_590	N-acetylphenylalanine	Amino Acid	Phenylalanine Metabolism	67404	C03519	HMDB00512	74839	0.366435	321	0.769399	0.924605	0.33594
Var_659	phosphate	Energy	Oxidative Phosphorylation	1032	C00009	HMDB01429	1061	0.368465	322	0.771259	0.963785	0.121016
Var_569	methylsuccinate	Amino Acid	Leucine, Isoleucine and Valine Metabolism	9922		HMDB01844	10349	0.369029	323	0.770049	1.06358	0.141045
Var_596	N-acetyltryptophan	Amino Acid	Tryptophan Metabolism	610602	C03137	HMDB13713	700653	0.369243	324	0.768116	0.885269	0.414558
Var_423	creatinine	Amino Acid	Creatine Metabolism	568	C00791	HMDB00562	588	0.369392	325	0.766063	1.01453	0.0429194
Var_605	N-palmitoyl-sphinganine (d18:0/16:0)	Lipid	Sphingolipid Metabolism	4446685		HMDB11760	5283572	0.372054	326	0.769216	1.02494	0.0902092
Var_323	4-acetamidobutanoate	Amino Acid	Polyamine Metabolism	17180	C02946	HMDB03681	18189	0.377589	327	0.778272	0.954704	0.13655
Var_436	dihomo-linoleate (20:2n6)	Lipid	Polyunsaturated Fatty Acid (n3 and n6)	4944228	C16525	HMDB05060	6439848	0.378176	328	0.777106	1.06014	0.147765
Var_123	thymol sulfate	Xenobiotics	Food Component/Plant	10709958	C09908	HMDB01878		0.380603	329	0.779715	0.967522	0.214713
Var_372	androstenediol (3beta,17beta) disulfate (2)	Lipid	Androgenic Steroids		C04295	HMDB03818	87120982	0.380893	330	0.777945	0.944979	0.159327
Var_114	malonate	Lipid	Fatty Acid Synthesis	844	C00383	HMDB00691	867	0.386425	331	0.786859	0.986187	0.412571
Var_463	etiocholanolone glucuronide	Lipid	Androgenic Steroids			HMDB04484	270605	0.389381	332	0.79049	0.954528	0.126534
Var_223	1-methylnicotinamide	Cofactors and Vitamins	Nicotinate and Nicotinamide Metabolism	8305504	C02918	HMDB00699	10129985	0.390607	333	0.790597	0.990813	0.118282
Var_518	histidine	Amino Acid	Histidine Metabolism	752	C00135	HMDB00177	6274	0.390911	334	0.788845	0.964858	0.131672
Var_734	threonate	Cofactors and Vitamins	Ascorbate and Aldarate Metabolism	133224	C01620	HMDB00943	151152	0.391356	335	0.787385	1.02067	0.0981659
Var_100	1-stearoyl-2-docosahexaenoyl-GPE (18:0/22:6)*	Lipid	Phosphatidylethanolamine (PE)	7825748		HMDB05334	9546798	0.392179	336	0.786692	0.932822	0.163283
Var_486	glutamine	Amino Acid	Glutamate Metabolism	5746	C00064	HMDB00641	5961	0.392692	337	0.785383	0.989713	0.0322388
Var_098	1-oleoyl-2-linoleoyl-GPE (18:1/18:2)*	Lipid	Phosphatidylethanolamine (PE)	7825703		HMDB05349	9546753	0.396246	338	0.790146	0.937828	0.501995
Var_301	3-hydroxyhexanoate	Lipid	Fatty Acid, Monohydroxy	133518			151492	0.397003	339	0.789321	0.933412	0.495775
Var_194	1-(1-enyl-palmitoyl)-2-linoleoyl-GPE (P-16:0/18:2)*	Lipid	Plasmalogen	24769229		HMDB11343		0.397007	340	0.787009	1.02924	0.111611
Var_121	pyrraline	Xenobiotics	Food Component/Plant	19980286		HMDB33143	122228	0.397847	341	0.786361	0.821241	0.405095
Var_204	1-(1-enyl-stearoyl)-GPE (P-18:0)*	Lipid	Lysoplasmalogen					0.400387	342	0.789067	1.18258	0.441058
Var_455	eicosenoate (20:1)	Lipid	Long Chain Fatty Acid	4445895	C16526	HMDB02231	5282768	0.400699	343	0.787379	1.15441	0.243945
Var_404	carotene diol (2)	Xenobiotics	Food Component/Plant					0.400844	344	0.785375	1.07102	0.176376
Var_126	1-oleoyl-GPI (18:1)*	Lipid	Lysophospholipid					0.401311	345	0.784011	0.948414	0.471195
Var_361	adrenate (22:4n6)	Lipid	Polyunsaturated Fatty Acid (n3 and n6)	4445971	C16527	HMDB02226	5497181	0.402607	346	0.78427	0.932347	0.299161
Var_517	hippurate	Xenobiotics	Benzoate Metabolism	451	C01586	HMDB00714	464	0.402661	347	0.782113	0.96623	0.118984
Var_512	glycoursodeoxycholate	Lipid	Secondary Bile Acid Metabolism	19973534		HMDB00708	12310288	0.403132	348	0.780779	0.895329	0.169583
Var_745	tyrosine	Amino Acid	Tyrosine Metabolism	5833	C00082	HMDB00158	6057	0.405406	349	0.782933	1.01151	0.0421345
Var_267	13-methylmyristate	Lipid	Fatty Acid, Branched	133106			151014	0.406214	350	0.782252	1.06768	0.320645
Var_433	dehydroisoandrosterone sulfate (DHEA-S)	Lipid	Androgenic Steroids	12074	C04555	HMDB01032	12594	0.409408	351	0.786156	0.924426	0.199863
Var_466	gamma-CEHC	Cofactors and Vitamins	Tocopherol Metabolism	117455		HMDB01931	133098	0.40953	352	0.784158	0.82505	0.338462
Var_115	N-acetylvaline	Amino Acid	Leucine, Isoleucine and Valine Metabolism	60154		HMDB11757	66789	0.409593	353	0.782056	0.924977	0.147919
Var_108	carotene diol (3)	Xenobiotics	Food Component/Plant					0.410913	354	0.78236	1.0611	0.18669
Var_741	trigonelline (N'-methylnicotinate)	Cofactors and Vitamins	Nicotinate and Nicotinamide Metabolism	5369	C01004	HMDB00875	5570	0.412289	355	0.782769	1.00901	0.0536187
Var_221	1-methylhistidine	Amino Acid	Histidine Metabolism	83153	C01152	HMDB00001	92105	0.414419	356	0.784601	0.940372	0.15001
Var_499	glycocholate	Lipid	Primary Bile Acid Metabolism	9734	C01921	HMDB00138	10140	0.415438	357	0.784329	0.965224	0.121402
Var_141	taurocholate	Lipid	Primary Bile Acid Metabolism		C05122	HMDB00036	6675	0.418942	358	0.788734	0.974594	0.102634
Var_320	3-ureidopropionate	Nucleotide	Pyrimidine Metabolism, Uracil containing	109	C02642	HMDB00026	111	0.421981	359	0.792243	1.068	0.204429
Var_116	N-formylanthranilic acid	Amino Acid	Tryptophan Metabolism	91624	C05653	HMDB04089	101399	0.422104	360	0.790273	0.944302	0.210611
Var_321	3beta,7alpha-dihydroxy-5-cholestenoate	Lipid	Sterol	2338764	C17335		3081084	0.426385	361	0.796077	0.954928	0.192521
Var_603	N-palmitoyl-heptadecasphingosine (d17:1/16:0)*	Lipid	Sphingolipid Metabolism					0.427071	362	0.795154	1.03751	0.167153
Var_639	p-cresol sulfate	Xenobiotics	Benzoate Metabolism	3806480		HMDB11635	4615423	0.430019	363	0.798437	0.970811	0.0941544
Var_101	17alpha-hydroxypregnenolone 3-sulfate	Lipid	Pregnenolone Steroids	134824		HMDB00416	152971	0.430984	364	0.79803	1.00308	0.279579
Var_571	myristate (14:0)	Lipid	Long Chain Fatty Acid	10539	C06424	HMDB00806	11005	0.431042	365	0.795952	1.04247	0.299281
Var_197	1-(1-enyl-palmitoyl)-2-palmitoleoyl-GPC (P-16:0/16:1)*	Lipid	Plasmalogen	24767482		HMDB11207		0.433605	366	0.798497	1.0642	0.164503
Var_282	2-hydroxyglutarate	Lipid	Fatty Acid, Dicarboxylate	42	C02630	HMDB00606	43	0.433801	367	0.796682	1.0232	0.0784361
Var_118	N4-acetylcytidine	Nucleotide	Pyrimidine Metabolism, Cytidine containing	96702		HMDB05923	107461	0.435117	368	0.796926	1.08913	0.277721
Var_196	1-(1-enyl-palmitoyl)-2-oleoyl-GPE (P-16:0/18:1)*	Lipid	Plasmalogen	24769228		HMDB11342		0.43847	369	0.800891	1.05267	0.184366
Var_437	dihomo-linolenate (20:3n3 or n6)	Lipid	Polyunsaturated Fatty Acid (n3 and n6)	4471954	C03242	HMDB02925	5280581	0.439815	370	0.801176	1.08572	0.358766
Var_547	linoleate (18:2n6)	Lipid	Polyunsaturated Fatty Acid (n3 and n6)	4444105	C01595	HMDB00673	5280450	0.441778	371	0.802583	1.02548	0.35589
Var_429	cysteinylglycine	Amino Acid	Glutathione Metabolism	58762	C01419	HMDB00078	439498	0.442095	372	0.800999	1.05203	0.161591
Var_556	linoleoylcholine*	Lipid	Fatty Acid Metabolism (Acyl Choline)					0.44302	373	0.800524	1.05325	0.191871
Var_682	S-methylcysteine	Amino Acid	Methionine, Cysteine, SAM and Taurine Metabolism	22826		HMDB02108	24417	0.446311	374	0.804314	0.937016	0.319154
Var_718	stearate (18:0)	Lipid	Long Chain Fatty Acid	5091	C01530	HMDB00827	5281	0.447669	375	0.804611	1.06988	0.181575
Var_264	10-undecenoate (11:1n1)	Lipid	Medium Chain Fatty Acid	10771160	C13910	HMDB33724	14891	0.447711	376	0.802545	1.01442	0.0559098
Var_502	glycodeoxycholate sulfate	Lipid	Secondary Bile Acid Metabolism					0.449889	377	0.804311	1.01921	0.181623
Var_332	4-methylcatechol sulfate	Xenobiotics	Benzoate Metabolism					0.449913	378	0.802227	0.850612	0.239752
Var_113	lanthionine	Xenobiotics	Chemical	88959			98504	0.453839	379	0.807091	1.06238	0.435129
Var_161	carboxyethyl-GABA	Amino Acid	Glutamate Metabolism	2474		HMDB02201	2572	0.4548	380	0.806671	1.04597	0.315661
Var_213	1-linolenoylglycerol (18:3)	Lipid	Monoacylglycerol	21403134		HMDB11569	53480978	0.457672	381	0.809635	1.12689	0.364245
Var_306	3-hydroxypyridine sulfate	Xenobiotics	Chemical	16232314				0.458889	382	0.809663	1.02321	0.147678
Var_438	dihomo-linolenoyl-choline	Lipid	Fatty Acid Metabolism (Acyl Choline)					0.45909	383	0.807903	1.08423	0.258151
Var_431	cytidine	Nucleotide	Pyrimidine Metabolism, Cytidine containing	5940	C00475	HMDB00089	6175	0.461995	384	0.810897	1.11058	0.192452
Var_683	S-methylcysteine sulfoxide	Amino Acid	Methionine, Cysteine, SAM and Taurine Metabolism	74136		HMDB29432	82142	0.462096	385	0.808967	1.0051	0.0276055
Var_742	trimethylamine N-oxide	Lipid	Phospholipid Metabolism	1113	C01104	HMDB00925	1145	0.462596	386	0.807746	1.01561	0.0508139
Var_508	glycosyl-N-nervonoyl-sphingosine (d18:1/24:1)*	Lipid	Ceramides					0.463055	387	0.806457	1.00834	0.0658653
Var_311	3-methyl-2-oxovalerate	Amino Acid	Leucine, Isoleucine and Valine Metabolism	46	C00671	HMDB03736	47	0.466429	388	0.810239	0.97356	0.193321
Var_484	glucuronate	Carbohydrate	Aminosugar Metabolism	58552	C00191	HMDB00127	444791	0.468605	389	0.811927	1.05987	0.187615
Var_482	gentisate	Amino Acid	Tyrosine Metabolism	3350	C00628	HMDB00152	3469	0.468797	390	0.810178	1.1066	0.190484
Var_283	2-hydroxynervonate*	Lipid	Fatty Acid, Monohydroxy	4472208			5312783	0.471094	391	0.812064	0.945026	0.255107
Var_396	biliverdin	Cofactors and Vitamins	Hemoglobin and Porphyrin Metabolism	10628548	C00500	HMDB01008	5353439	0.47187	392	0.811327	1.00579	0.0828229
Var_158	anthranilate	Amino Acid	Tryptophan Metabolism	222	C00108	HMDB01123	227	0.476988	393	0.81804	1.01258	0.146471
Var_277	2-aminophenol sulfate	Xenobiotics	Chemical	158022		HMDB61116	181670	0.478072	394	0.817818	0.918418	0.224373
Var_597	N-behenoyl-sphingadienine (d18:2/22:0)*	Lipid	Sphingolipid Metabolism					0.478191	395	0.815952	1.0139	0.062067
Var_606	N-palmitoyl-sphingosine (d18:1/16:0)	Lipid	Ceramides	4446677		HMDB04949	5283564	0.480049	396	0.817053	1.042	0.170856
Var_527	indolelactate	Amino Acid	Tryptophan Metabolism	83867	C02043	HMDB00671	92904	0.483221	397	0.820381	0.989312	0.124656
Var_634	oleoylcholine	Lipid	Fatty Acid Metabolism (Acyl Choline)					0.483725	398	0.819172	1.04517	0.207772
Var_349	5alpha-pregnan-3beta,20beta-diol monosulfate (1)	Lipid	Progestin Steroids					0.484834	399	0.818992	0.943478	0.162921
Var_708	sphingomyelin (d18:2/16:0, d18:1/16:1)*	Lipid	Sphingolipid Metabolism					0.485054	400	0.817316	1.01356	0.0479288
Var_243	1-palmitoyl-2-oleoyl-GPI (16:0/18:1)*	Lipid	Phosphatidylinositol (PI)	24767668		HMDB09783		0.486874	401	0.818336	1.02879	0.143078
Var_520	homostachydrine*	Xenobiotics	Food Component/Plant	390180	C08283	HMDB33433	441447	0.487336	402	0.817076	0.985167	0.042526
Var_701	sphingomyelin (d18:1/20:2, d18:2/20:1, d16:1/22:2)*	Lipid	Sphingolipid Metabolism					0.487493	403	0.815311	1.11154	0.308489
Var_427	cysteine sulfinic acid	Amino Acid	Methionine, Cysteine, SAM and Taurine Metabolism	107	C00606	HMDB00996	109	0.491524	404	0.820018	1.03045	0.123287
Var_203	1-(1-enyl-stearoyl)-2-oleoyl-GPE (P-18:0/18:1)	Lipid	Plasmalogen	24769260		HMDB11375		0.493524	405	0.821322	0.944151	0.626481
Var_530	isobutyrylcarnitine (C4)	Amino Acid	Leucine, Isoleucine and Valine Metabolism			HMDB00736	168379	0.493774	406	0.819713	1.01219	0.087665
Var_680	ribonate	Carbohydrate	Pentose Metabolism	4574162	C01685	HMDB00867	5460677	0.498306	407	0.825204	0.869093	0.532481
Var_366	alpha-ketoglutarate	Energy	TCA Cycle	50	C00026	HMDB00208	51	0.505065	408	0.834347	1.01465	0.12173
Var_525	imidazole propionate	Amino Acid	Histidine Metabolism	63798		HMDB02271	70630	0.507794	409	0.836805	1.07333	0.201786
Var_671	propionylcarnitine (C3)	Lipid	Fatty Acid Metabolism (also BCAA Metabolism)	96904	C03017	HMDB00824	107738	0.507821	410	0.834808	0.956511	0.1719
Var_215	1-linoleoyl-2-linolenoyl-GPC (18:2/18:3)*	Lipid	Phosphatidylcholine (PC)	24766802		HMDB08141		0.508941	411	0.834613	1.07813	0.177938
Var_328	4-hydroxychlorothalonil	Xenobiotics	Chemical	31530			34217	0.513207	412	0.839566	0.983115	0.130743
Var_207	1-arachidonoyl-GPE (20:4n6)*	Lipid	Lysophospholipid	21403171		HMDB11517	42607465	0.515607	413	0.841451	1.02812	0.133232
Var_109	dimethyl sulfone	Xenobiotics	Chemical	5978	C11142	HMDB04983	6213	0.516451	414	0.840793	1.07615	0.230677
Var_748	uridine	Nucleotide	Pyrimidine Metabolism, Uracil containing	5807	C00299	HMDB00296	6029	0.519367	415	0.843502	0.925394	0.350317
Var_169	hyocholate	Lipid	Secondary Bile Acid Metabolism	21403098	C17649	HMDB00760	92805	0.523318	416	0.847876	0.918643	0.230276
Var_457	epiandrosterone sulfate	Lipid	Androgenic Steroids	21403101			9929317	0.524222	417	0.847304	0.903889	0.252338
Var_711	sphingomyelin (d18:2/23:0, d18:1/23:1, d17:1/24:1)*	Lipid	Sphingolipid Metabolism					0.525087	418	0.846671	0.985699	0.07282
Var_449	docosapentaenoate (n6 DPA; 22:5n6)	Lipid	Polyunsaturated Fatty Acid (n3 and n6)	4945614	C16513	HMDB01976	6441454	0.525319	419	0.845023	1.0125	0.301275
Var_148	2-hydroxyhippurate (salicylurate)	Xenobiotics	Benzoate Metabolism	9835	C07588	HMDB00840	10253	0.529788	420	0.850184	1.03102	0.176997
Var_085	ascorbate (Vitamin C)	Cofactors and Vitamins	Ascorbate and Aldarate Metabolism	10189562	C00072	HMDB00044		0.529808	421	0.848196	0.724673	0.739688
Var_381	arachidonoylcholine	Lipid	Fatty Acid Metabolism (Acyl Choline)					0.530264	422	0.846914	1.02954	0.214318
Var_519	homoarginine	Amino Acid	Urea cycle; Arginine and Proline Metabolism	8732	C01924	HMDB00670	9085	0.531452	423	0.846806	0.98599	0.0616732
Var_280	2-hydroxybutyrate/2-hydroxyisobutyrate	Amino Acid	Glutathione Metabolism					0.534575	424	0.849772	0.968693	0.08564
Var_412	cholesterol	Lipid	Sterol	4937803	C00187	HMDB00067	11025495	0.536373	425	0.850624	1.01336	0.0630306
Var_469	gamma-glutamylalanine	Peptide	Gamma-glutamyl Amino Acid	389104		HMDB29142	440103	0.538556	426	0.852081	1.10698	0.658098
Var_707	sphingomyelin (d18:2/14:0, d18:1/14:1)*	Lipid	Sphingolipid Metabolism					0.538779	427	0.850438	1.02148	0.130451
Var_735	threonine	Amino Acid	Glycine, Serine and Threonine Metabolism	6051	C00188	HMDB00167	6288	0.541398	428	0.852576	1.00855	0.0361727
Var_279	2-hydroxy-3-methylvalerate	Amino Acid	Leucine, Isoleucine and Valine Metabolism	144317		HMDB00317	164623	0.542513	429	0.852339	0.928187	0.367078
Var_497	glycochenodeoxycholate glucuronide (1)	Lipid	Primary Bile Acid Metabolism					0.549456	430	0.86124	1.04932	0.13292
Var_421	cortisone	Lipid	Corticosteroids	361685	C00762	HMDB02802	222786	0.55105	431	0.861735	0.971146	0.152953
Var_138	N-stearoyl-sphinganine (d18:0/18:0)*	Lipid	Sphingolipid Metabolism	4446686			5283573	0.551097	432	0.859813	0.960238	0.255319
Var_664	pregn steroid monosulfate C21H34O5S*	Lipid	Progestin Steroids	13465233				0.55187	433	0.85903	0.966028	0.17187
Var_628	oleoyl-arachidonoyl-glycerol (18:1/20:4) [2]*	Lipid	Diacylglycerol			HMDB07228		0.553994	434	0.86035	1.01556	0.106598
Var_217	1-linoleoyl-GPC (18:2)	Lipid	Lysophospholipid	10160888	C04100	HMDB10386	11988421	0.555566	435	0.860809	1.02035	0.0913066
Var_312	3-methylcytidine	Nucleotide	Pyrimidine Metabolism, Cytidine containing	9164190			159649	0.556082	436	0.859631	0.979653	0.160097
Var_501	glycodeoxycholate	Lipid	Secondary Bile Acid Metabolism		C05464	HMDB00631	3035026	0.557718	437	0.860188	0.93375	0.193557
Var_498	glycochenodeoxycholate sulfate	Lipid	Primary Bile Acid Metabolism					0.561482	438	0.864016	0.980907	0.172101
Var_218	1-linoleoyl-GPE (18:2)*	Lipid	Lysophospholipid	21403170		HMDB11507	52925130	0.56191	439	0.862705	1.00531	0.165711
Var_592	N-acetylputrescine	Amino Acid	Polyamine Metabolism	109095	C02714	HMDB02064	122356	0.562585	440	0.861777	1.01774	0.0969636
Var_432	decanoylcarnitine (C10)	Lipid	Fatty Acid Metabolism(Acyl Carnitine)	8420677		HMDB00651	10245190	0.564192	441	0.86228	1.00011	0.0820956
Var_506	glycosyl ceramide (d18:2/24:1, d18:1/24:2)*	Lipid	Ceramides					0.565266	442	0.861967	1.0157	0.0885958
Var_473	gamma-glutamylisoleucine*	Peptide	Gamma-glutamyl Amino Acid	21403145		HMDB11170	14253342	0.56757	443	0.863527	0.872547	0.392897
Var_357	adenine	Nucleotide	Purine Metabolism, Adenine containing	185	C00147	HMDB00034	190	0.576576	444	0.875252	1.16696	0.363851
Var_106	arabinose	Carbohydrate	Pentose Metabolism	59687	C00216	HMDB00646	66308	0.581262	445	0.880383	0.671725	0.736528
Var_193	1-(1-enyl-palmitoyl)-2-linoleoyl-GPC (P-16:0/18:2)*	Lipid	Plasmalogen	24767486		HMDB11211		0.581741	446	0.879133	1.03771	0.1335
Var_587	N-acetylleucine	Amino Acid	Leucine, Isoleucine and Valine Metabolism	64075	C02710	HMDB11756	70912	0.584169	447	0.880828	0.943654	0.345743
Var_650	palmitoylcholine	Lipid	Fatty Acid Metabolism (Acyl Choline)	133731			151731	0.58513	448	0.880308	1.02193	0.180352
Var_128	3-methyl catechol sulfate (1)	Xenobiotics	Benzoate Metabolism					0.586257	449	0.880038	0.958975	0.262991
Var_251	1-stearoyl-2-arachidonoyl-GPC (18:0/20:4)	Lipid	Phosphatidylcholine (PC)	17347139		HMDB08048	16219824	0.592618	450	0.88761	1.01433	0.0643356
Var_166	gluconate	Xenobiotics	Food Component/Plant	10240	C00257	HMDB00625	10690	0.594491	451	0.888441	1.07546	0.357
Var_651	pantothenate	Cofactors and Vitamins	Pantothenate and CoA Metabolism	6361	C00864	HMDB00210	6613	0.597422	452	0.890846	0.983245	0.195714
Var_622	O-sulfo-L-tyrosine	Xenobiotics	Chemical	448617			514186	0.598134	453	0.889939	0.949392	0.211049
Var_187	1,2-dilinoleoyl-GPC (18:2/18:2)	Lipid	Phosphatidylcholine (PC)	4450312		HMDB08138	5288075	0.599052	454	0.889342	1.00881	0.106903
Var_443	dimethylarginine (SDMA + ADMA)	Amino Acid	Urea cycle; Arginine and Proline Metabolism	110375	C03626	HMDB01539	123831	0.599682	455	0.88832	0.991609	0.0658561
Var_626	oleate/vaccenate (18:1)	Lipid	Long Chain Fatty Acid					0.600297	456	0.887281	0.999073	0.114221
Var_528	indolepropionate	Amino Acid	Tryptophan Metabolism	3613		HMDB02302	3744	0.60177	457	0.887512	0.985345	0.146035
Var_714	sphingomyelin (d18:2/24:2)*	Lipid	Sphingolipid Metabolism					0.604438	458	0.8895	1.04687	0.164864
Var_677	quinolinate	Cofactors and Vitamins	Nicotinate and Nicotinamide Metabolism	1037	C03722	HMDB00232	1066	0.605391	459	0.888962	1.07186	0.304418
Var_188	1,2-dipalmitoyl-GPC (16:0/16:0)	Lipid	Phosphatidylcholine (PC)	398235	D03585	HMDB00564	452110	0.606201	460	0.888216	0.986104	0.0614956
Var_289	2-oxoarginine*	Amino Acid	Urea cycle; Arginine and Proline Metabolism	542	C03771	HMDB04225	558	0.606944	461	0.887375	0.936145	0.18093
Var_511	glycosyl-N-tricosanoyl-sphingadienine (d18:2/23:0)*	Lipid	Ceramides					0.608001	462	0.886997	1.03295	0.493828
Var_206	1-arachidonoyl-GPC (20:4n6)*	Lipid	Lysophospholipid	21403155	C05208	HMDB10395		0.611799	463	0.89061	1.02715	0.123743
Var_338	5-methylthioadenosine (MTA)	Amino Acid	Polyamine Metabolism	388321	C00170	HMDB01173	439176	0.613326	464	0.890909	0.95561	0.235186
Var_244	1-palmitoyl-2-palmitoleoyl-GPC (16:0/16:1)*	Lipid	Phosphatidylcholine (PC)			HMDB07969		0.61825	465	0.89613	0.984248	0.0624743
Var_168	glycosyl ceramide (d18:1/23:1, d17:1/24:1)*	Lipid	Ceramides					0.618938	466	0.895202	1.04916	0.30592
Var_652	pentadecanoate (15:0)	Lipid	Long Chain Fatty Acid	13249	C16537	HMDB00826	13849	0.619589	467	0.894225	1.02725	0.305584
Var_253	1-stearoyl-2-arachidonoyl-GPI (18:0/20:4)	Lipid	Phosphatidylinositol (PI)	21403055		HMDB09815		0.620098	468	0.893047	0.971722	0.168432
Var_119	palmitoleoyl-linoleoyl-glycerol (16:1/18:2) [1]*	Lipid	Diacylglycerol			HMDB07132		0.620665	469	0.891958	0.968013	0.540143
Var_414	choline phosphate	Lipid	Phospholipid Metabolism	119298	C00588	HMDB01565	1014	0.622136	470	0.89217	0.970564	0.198985
Var_409	ceramide (d18:1/20:0, d16:1/22:0, d20:1/18:0)*	Lipid	Ceramides					0.62245	471	0.890725	1.01041	0.0634084
Var_476	gamma-glutamylphenylalanine	Peptide	Gamma-glutamyl Amino Acid	99868		HMDB00594	111299	0.622455	472	0.888845	0.945899	0.243525
Var_240	1-palmitoyl-2-linoleoyl-GPI (16:0/18:2)	Lipid	Phosphatidylinositol (PI)	21403024		HMDB09784		0.623241	473	0.888086	1.02451	0.187886
Var_446	docosahexaenoate (DHA; 22:6n3)	Lipid	Polyunsaturated Fatty Acid (n3 and n6)	393183	C06429	HMDB02183	445580	0.623245	474	0.886217	1.04434	0.507512
Var_521	hydantoin-5-propionic acid	Amino Acid	Histidine Metabolism	761	C05565	HMDB01212	782	0.623276	475	0.884395	1.03054	0.267158
Var_288	2-methylbutyrylcarnitine (C5)	Amino Acid	Leucine, Isoleucine and Valine Metabolism	4932320		HMDB00378	6426901	0.625654	476	0.885905	0.987115	0.0984165
Var_392	betaine	Amino Acid	Glycine, Serine and Threonine Metabolism	24219951173	C00719	HMDB00043	247	0.626005	477	0.884544	1.00298	0.022724
Var_238	1-palmitoyl-2-linoleoyl-GPC (16:0/18:2)	Lipid	Phosphatidylcholine (PC)	4450224		HMDB07973	5287971	0.632892	478	0.892404	1.01774	0.109528
Var_698	sphingomyelin (d18:1/19:0, d19:1/18:0)*	Lipid	Sphingolipid Metabolism					0.63365	479	0.891608	1.03401	0.127664
Var_551	linoleoyl-arachidonoyl-glycerol (18:2/20:4) [1]*	Lipid	Diacylglycerol			HMDB07257		0.634285	480	0.890641	1.0127	0.164925
Var_353	7-methylxanthine	Xenobiotics	Xanthine Metabolism	61660	C16353	HMDB01991	68374	0.638896	481	0.895251	0.976896	0.100021
Var_252	1-stearoyl-2-arachidonoyl-GPE (18:0/20:4)	Lipid	Phosphatidylethanolamine (PE)	4451158		HMDB09003	5289133	0.639818	482	0.894684	1.00789	0.149407
Var_291	2-piperidinone	Xenobiotics	Food Component/Plant	12144		HMDB11749	12665	0.640498	483	0.89378	0.967357	0.0966235
Var_674	pyridoxate	Cofactors and Vitamins	Vitamin B6 Metabolism	6467	C00847	HMDB00017	6723	0.640915	484	0.892514	0.933269	0.264341
Var_304	3-hydroxylaurate	Lipid	Fatty Acid, Monohydroxy	85026		HMDB00387	94216	0.641495	485	0.89148	1.05826	0.130969
Var_403	carotene diol (1)	Xenobiotics	Food Component/Plant					0.641642	486	0.889849	0.996921	0.0829829
Var_454	eicosapentaenoate (EPA; 20:5n3)	Lipid	Polyunsaturated Fatty Acid (n3 and n6)	393682	C06428	HMDB01999	446284	0.647395	487	0.895984	1.10093	0.536965
Var_416	cis-4-decenoylcarnitine (C10:1)	Lipid	Fatty Acid Metabolism(Acyl Carnitine)	28639171				0.64771	488	0.894584	1.0192	0.0993027
Var_578	N-acetylarginine	Amino Acid	Urea cycle; Arginine and Proline Metabolism	60752	C02562	HMDB04620	67427	0.65076	489	0.896957	1.00485	0.0490589
Var_134	homocitrulline	Amino Acid	Urea cycle; Arginine and Proline Metabolism	58582	C02427	HMDB00679	65072	0.651689	490	0.896405	0.912374	0.337782
Var_122	quinate	Xenobiotics	Food Component/Plant	10246715	C00296	HMDB03072	6508	0.658133	491	0.903424	1.02939	0.371107
Var_538	lactosyl-N-behenoyl-sphingosine (d18:1/22:0)*	Lipid	Sphingolipid Metabolism	24846893				0.660456	492	0.904772	1.01195	0.0769787
Var_548	linolenate [alpha or gamma; (18:3n3 or 6)]	Lipid	Polyunsaturated Fatty Acid (n3 and n6)	4444437	C06426	HMDB03073	5280934	0.664595	493	0.908595	0.949761	0.446546
Var_272	2'-O-methylcytidine	Nucleotide	Pyrimidine Metabolism, Cytidine containing	133067			150971	0.664909	494	0.907184	1.00534	0.101436
Var_631	oleoyl-oleoyl-glycerol (18:1/18:1) [1]*	Lipid	Diacylglycerol			HMDB07218		0.666564	495	0.907604	1.04294	0.171361
Var_737	thyroxine	Amino Acid	Tyrosine Metabolism	5614	C01829	HMDB01918	5819	0.667008	496	0.906378	1.02324	0.135396
Var_588	N-acetylmethionine	Amino Acid	Methionine, Cysteine, SAM and Taurine Metabolism	395338	C02712	HMDB11745	448580	0.668059	497	0.905979	1.06703	0.302438
Var_343	5alpha-androstan-3alpha,17beta-diol monosulfate (1)	Lipid	Androgenic Steroids					0.668515	498	0.904778	0.85964	0.411274
Var_595	N-acetylthreonine	Amino Acid	Glycine, Serine and Threonine Metabolism	3841173			152204	0.668799	499	0.903348	0.941558	0.317612
Var_658	phenylpyruvate	Amino Acid	Phenylalanine Metabolism	972	C00166	HMDB00205	997	0.668996	500	0.901807	1.01763	0.193548
Var_257	1-stearoyl-2-linoleoyl-GPI (18:0/18:2)	Lipid	Phosphatidylinositol (PI)	24767694		HMDB09809		0.669585	501	0.900799	1.02374	0.124624
Var_347	5alpha-pregnan-3beta,20alpha-diol disulfate	Lipid	Progestin Steroids					0.669939	502	0.89948	1.00114	0.168736
Var_749	valine	Amino Acid	Leucine, Isoleucine and Valine Metabolism	6050	C00183	HMDB00883	6287	0.672062	503	0.900536	1.00821	0.0455574
Var_326	4-ethylphenylsulfate	Xenobiotics	Benzoate Metabolism		C13637			0.672516	504	0.899357	0.891494	0.22356
Var_398	C-glycosyltryptophan	Amino Acid	Tryptophan Metabolism	9157171			10981970	0.673878	505	0.899394	1.01921	0.191735
Var_302	3-hydroxyhippurate	Xenobiotics	Benzoate Metabolism	396603		HMDB06116	450268	0.673964	506	0.897731	0.923291	0.291589
Var_245	1-palmitoyl-2-stearoyl-GPC (16:0/18:0)	Lipid	Phosphatidylcholine (PC)	24766643		HMDB07970		0.674044	507	0.896067	1.02011	0.114267
Var_719	stearidonate (18:4n3)	Lipid	Polyunsaturated Fatty Acid (n3 and n6)	4471933	C16300	HMDB06547	5312508	0.681794	508	0.904585	1.02384	0.556807
Var_706	sphingomyelin (d18:1/25:0, d19:0/24:1, d20:1/23:0, d19:1/24:0)*	Lipid	Sphingolipid Metabolism	24846885				0.684044	509	0.905787	1.00733	0.120667
Var_705	sphingomyelin (d18:1/24:1, d18:2/24:0)*	Lipid	Sphingolipid Metabolism	24846874		HMDB12107		0.685911	510	0.906478	1.00422	0.096021
Var_730	taurocholenate sulfate	Lipid	Secondary Bile Acid Metabolism					0.690369	511	0.910584	0.977973	0.101177
Var_452	ectoine	Xenobiotics	Chemical	112069	C06231		126041	0.693317	512	0.912687	0.942403	0.174229
Var_195	1-(1-enyl-palmitoyl)-2-oleoyl-GPC (P-16:0/18:1)*	Lipid	Plasmalogen					0.695408	513	0.913655	1.02517	0.102238
Var_241	1-palmitoyl-2-oleoyl-GPC (16:0/18:1)	Lipid	Phosphatidylcholine (PC)	4940699		HMDB07972	6436017	0.695559	514	0.912075	0.991125	0.0640255
Var_577	N-acetylalanine	Amino Acid	Alanine and Aspartate Metabolism	79449	C02847	HMDB00766	88064	0.699397	515	0.915328	0.967561	0.285765
Var_294	3-(4-hydroxyphenyl)lactate	Amino Acid	Tyrosine Metabolism	9010	C03672	HMDB00755	9378	0.699757	516	0.914024	0.992353	0.215229
Var_189	1,5-anhydroglucitol (1,5-AG)	Carbohydrate	Glycolysis, Gluconeogenesis, and Pyruvate Metabolism		C07326	HMDB02712	64960	0.703539	517	0.917186	0.978537	0.190265
Var_284	2-hydroxypalmitate	Lipid	Fatty Acid, Monohydroxy	83805		HMDB31057	92836	0.704509	518	0.916678	0.983068	0.204614
Var_095	N-acetyltyrosine	Amino Acid	Tyrosine Metabolism	61606		HMDB00866	68310	0.706866	519	0.917972	1.04469	0.31174
Var_270	16a-hydroxy DHEA 3-sulfate	Lipid	Androgenic Steroids					0.70802	520	0.917703	1.00913	0.230916
Var_645	palmitoyl dihydrosphingomyelin (d18:0/16:0)*	Lipid	Sphingolipid Metabolism	8115586			9939965	0.709406	521	0.917734	0.99221	0.0745097
Var_544	lignoceroyl sphingomyelin (d18:1/24:0)	Lipid	Sphingolipid Metabolism	24846875				0.710604	522	0.917523	1.0086	0.0609433
Var_721	stearoyl sphingomyelin (d18:1/18:0)	Lipid	Sphingolipid Metabolism	4956085	C00550	HMDB01348	6453725	0.7107	523	0.915893	1.0052	0.0762369
Var_744	tryptophan betaine	Amino Acid	Tryptophan Metabolism	390633	C09213	HMDB61115	442106	0.710931	524	0.914442	0.977034	0.0807476
Var_112	isovalerylglycine	Amino Acid	Leucine, Isoleucine and Valine Metabolism	475516		HMDB00678	546304	0.712282	525	0.914434	0.935062	0.39128
Var_127	2-docosahexaenoylglycerol (22:6)*	Lipid	Monoacylglycerol	24765781		HMDB11557		0.71274	526	0.913283	1.01115	0.468778
Var_700	sphingomyelin (d18:1/20:1, d18:2/20:0)*	Lipid	Sphingolipid Metabolism					0.714651	527	0.913994	1.00343	0.0706225
Var_500	glycocholenate sulfate*	Lipid	Secondary Bile Acid Metabolism					0.718757	528	0.917504	0.976197	0.132271
Var_642	palmitoleate (16:1n7)	Lipid	Long Chain Fatty Acid	393216	C08362	HMDB03229	445638	0.722741	529	0.920846	0.993175	0.466502
Var_585	N-acetylglycine	Amino Acid	Glycine, Serine and Threonine Metabolism	10507		HMDB00532	10972	0.722957	530	0.919383	0.985834	0.138305
Var_419	citrulline	Amino Acid	Urea cycle; Arginine and Proline Metabolism	810	C00327	HMDB00904	9750	0.723014	531	0.917724	0.9882	0.0886224
Var_183	taurodeoxycholate	Lipid	Secondary Bile Acid Metabolism	2015539	C05463	HMDB00896	2733768	0.727357	532	0.921502	0.942626	0.169191
Var_574	myristoyl dihydrosphingomyelin (d18:0/14:0)*	Lipid	Sphingolipid Metabolism	24846886		HMDB12085		0.730187	533	0.923351	1.02787	0.157704
Var_657	phenyllactate (PLA)	Amino Acid	Phenylalanine Metabolism	3715	C05607	HMDB00779	3848	0.733137	534	0.925345	0.989669	0.100279
Var_747	urea	Amino Acid	Urea cycle; Arginine and Proline Metabolism	1143	C00086	HMDB00294	1176	0.734722	535	0.925612	1.00372	0.0437664
Var_276	2-aminooctanoate	Lipid	Fatty Acid, Amino	62727		HMDB00991	69522	0.734876	536	0.924079	1.01803	0.162064
Var_224	1-myristoyl-2-arachidonoyl-GPC (14:0/20:4)*	Lipid	Phosphatidylcholine (PC)	24766559		HMDB07883		0.738456	537	0.926851	0.983839	0.0926547
Var_290	2-palmitoyl-GPC (16:0)*	Lipid	Lysophospholipid	21403165		HMDB61702	15061532	0.739254	538	0.926129	1.00808	0.288652
Var_181	succinimide	Xenobiotics	Chemical	10955	C07273		11439	0.740783	539	0.926323	1.01758	0.192746
Var_545	lignoceroylcarnitine (C24)*	Lipid	Fatty Acid Metabolism(Acyl Carnitine)					0.746047	540	0.931177	1.02116	0.0711802
Var_695	sphingomyelin (d18:1/14:0, d16:1/16:0)*	Lipid	Sphingolipid Metabolism	9608732		HMDB12097	11433862	0.746179	541	0.92962	1.00351	0.0536943
Var_163	dodecanedioate	Lipid	Fatty Acid, Dicarboxylate	12213	C02678	HMDB00623	12736	0.746559	542	0.928378	0.877267	0.588322
Var_593	N-acetylserine	Amino Acid	Glycine, Serine and Threonine Metabolism	58744		HMDB02931	65249	0.748616	543	0.929222	1.01399	0.165673
Var_377	arabonate/xylonate	Carbohydrate	Pentose Metabolism					0.75026	544	0.92955	0.958712	0.191985
Var_201	1-(1-enyl-stearoyl)-2-arachidonoyl-GPE (P-18:0/20:4)*	Lipid	Plasmalogen	7826008		HMDB05779	9547058	0.751979	545	0.929971	1.02343	0.228954
Var_515	hexadecadienoate (16:2n6)	Lipid	Polyunsaturated Fatty Acid (n3 and n6)	13628094		HMDB00477		0.753399	546	0.93002	1.03665	0.45432
Var_248	1-palmitoyl-GPE (16:0)	Lipid	Lysophospholipid	7826019		HMDB11503	9547069	0.755642	547	0.931084	1.02091	0.191611
Var_472	gamma-glutamylhistidine	Peptide	Gamma-glutamyl Amino Acid	5380197			7017195	0.755971	548	0.92979	1.00803	0.0596037
Var_198	1-(1-enyl-palmitoyl)-2-palmitoyl-GPC (P-16:0/16:0)*	Lipid	Plasmalogen	9322076		HMDB11206	11146967	0.757249	549	0.929665	1.01821	0.105687
Var_249	1-palmitoyl-GPI (16:0)	Lipid	Lysophospholipid			HMDB61695		0.760104	550	0.931473	0.926809	0.427829
Var_586	N-acetylhistidine	Amino Acid	Histidine Metabolism	68142	C02997	HMDB32055	75619	0.762804	551	0.933085	1.0267	0.124699
Var_170	indole-3-carboxylic acid	Amino Acid	Tryptophan Metabolism		C19837	HMDB03320	69867	0.765568	552	0.93477	1.01285	0.126668
Var_507	glycosyl-N-(2-hydroxynervonoyl)-sphingosine (d18:1/24:1(2OH))*	Lipid	Ceramides					0.768509	553	0.936663	1.02375	0.108564
Var_255	1-stearoyl-2-linoleoyl-GPC (18:0/18:2)*	Lipid	Phosphatidylcholine (PC)			HMDB08039		0.769116	554	0.935711	1.01073	0.087837
Var_097	1-methylxanthine	Xenobiotics	Xanthine Metabolism	72464	C16358	HMDB10738	80220	0.770519	555	0.93573	1.03251	0.221943
Var_709	sphingomyelin (d18:2/18:1)*	Lipid	Sphingolipid Metabolism					0.774747	556	0.939172	1.00928	0.0597382
Var_752	ximenoylcarnitine (C26:1)*	Lipid	Fatty Acid Metabolism(Acyl Carnitine)					0.776343	557	0.939416	1.00852	0.128448
Var_096	oleoyl-linolenoyl-glycerol (18:1/18:3) [2]*	Lipid	Diacylglycerol			HMDB07220		0.776371	558	0.937767	1.08594	0.505527
Var_568	methylmalonate (MMA)	Lipid	Fatty Acid Metabolism (also BCAA Metabolism)	473	C02170	HMDB00202	487	0.776547	559	0.936302	1.00077	0.233445
Var_258	1-stearoyl-2-oleoyl-GPC (18:0/18:1)	Lipid	Phosphatidylcholine (PC)	24766704		HMDB08038		0.778783	560	0.937321	1.00639	0.0833618
Var_481	gamma-tocopherol/beta-tocopherol	Cofactors and Vitamins	Tocopherol Metabolism					0.779709	561	0.936763	1.03537	0.257465
Var_342	5alpha-androstan-3alpha,17beta-diol disulfate	Lipid	Androgenic Steroids					0.781893	562	0.937714	1.00639	0.208246
Var_435	deoxycholate	Lipid	Secondary Bile Acid Metabolism	389318	C04483	HMDB00626	222528	0.793173	563	0.949553	0.950209	0.218761
Var_269	15-methylpalmitate	Lipid	Fatty Acid, Branched				17903417	0.798683	564	0.954454	1.00193	0.172024
Var_601	N-methylproline	Amino Acid	Urea cycle; Arginine and Proline Metabolism	541			557	0.799715	565	0.953997	0.99092	0.134252
Var_397	butyrylcarnitine (C4)	Lipid	Fatty Acid Metabolism (also BCAA Metabolism)	184820	C02862	HMDB02013	439829	0.803207	566	0.956469	1.00546	0.131019
Var_445	docosadienoate (22:2n6)	Lipid	Polyunsaturated Fatty Acid (n3 and n6)	4445934	C16533	HMDB61714	5282807	0.805962	567	0.958057	0.994809	0.156086
Var_479	gamma-glutamyltyrosine	Peptide	Gamma-glutamyl Amino Acid	85142		HMDB11741	94340	0.807344	568	0.958011	1.01017	0.248781
Var_318	3-phenylpropionate (hydrocinnamate)	Xenobiotics	Benzoate Metabolism	10181339	C05629	HMDB00764	107	0.808495	569	0.95769	1.05954	0.174838
Var_367	alpha-tocopherol	Cofactors and Vitamins	Tocopherol Metabolism	14265	C02477	HMDB01893	14985	0.809355	570	0.957026	1.00842	0.0728136
Var_573	myristoleoylcarnitine (C14:1)*	Lipid	Fatty Acid Metabolism(Acyl Carnitine)	34999520			90659872	0.810415	571	0.956602	1.01014	0.103173
Var_358	adipate	Lipid	Fatty Acid, Dicarboxylate	191	C06104	HMDB00448	196	0.811841	572	0.95661	0.927435	0.359384
Var_324	4-allylphenol sulfate	Xenobiotics	Food Component/Plant					0.813419	573	0.956796	0.97987	0.179515
Var_694	sphingomyelin (d18:0/20:0, d16:0/22:0)*	Lipid	Sphingolipid Metabolism					0.814627	574	0.956548	0.97669	0.125056
Var_316	3-methylhistidine	Amino Acid	Histidine Metabolism	58494	C01152	HMDB00479	64969	0.814789	575	0.955075	0.839801	0.247922
Var_153	3-(3-hydroxyphenyl)propionate	Xenobiotics	Benzoate Metabolism	89	C11457	HMDB00375	91	0.814856	576	0.953495	0.96574	0.154355
Var_293	21-hydroxypregnenolone disulfate	Lipid	Pregnenolone Steroids	118625			134595	0.81636	577	0.953599	1.01296	0.100431
Var_526	indoleacetate	Amino Acid	Tryptophan Metabolism	780	C00954	HMDB00197	802	0.816392	578	0.951987	0.996868	0.0859386
Var_233	1-palmitoyl-2-arachidonoyl-GPC (16:0/20:4n6)	Lipid	Phosphatidylcholine (PC)	8923140		HMDB07982	10747814	0.820671	579	0.955324	0.994868	0.0702267
Var_600	N-methylpipecolate	Xenobiotics	Bacterial/Fungal	9461516			11286529	0.827601	580	0.96173	0.956034	0.287315
Var_444	dimethylglycine	Amino Acid	Glycine, Serine and Threonine Metabolism	653	C01026	HMDB00092	673	0.828134	581	0.960693	1.00435	0.0527142
Var_235	1-palmitoyl-2-arachidonoyl-GPI (16:0/20:4)*	Lipid	Phosphatidylinositol (PI)	24767674		HMDB09789		0.830421	582	0.96169	0.987771	0.126997
Var_417	citraconate/glutaconate	Energy	TCA Cycle					0.831218	583	0.960962	1.02476	0.0659335
Var_162	docosadioate	Lipid	Fatty Acid, Dicarboxylate	214170	C19625		244872	0.837166	584	0.966181	0.93665	0.207774
Var_584	N-acetylglutamine	Amino Acid	Glutamate Metabolism	158492	C02716	HMDB06029	182230	0.838919	585	0.966549	1.05222	0.250323
Var_157	acisoga	Amino Acid	Polyamine Metabolism	114601			129397	0.839846	586	0.965966	0.989836	0.36693
Var_099	1-palmitoleoyl-2-linolenoyl-GPC (16:1/18:3)*	Lipid	Phosphatidylcholine (PC)	24766677		HMDB08008		0.847149	587	0.972706	0.998756	0.294362
Var_504	glycolithocholate sulfate*	Lipid	Secondary Bile Acid Metabolism	65188	C11301	HMDB02639	72222	0.847465	588	0.971413	1.03279	0.142772
Var_136	N-acetyl-1-methylhistidine*	Amino Acid	Histidine Metabolism				193270	0.848574	589	0.971034	0.966174	0.219698
Var_350	6-hydroxyindole sulfate	Xenobiotics	Chemical					0.851356	590	0.972566	0.945745	0.285967
Var_192	1-(1-enyl-palmitoyl)-2-arachidonoyl-GPE (P-16:0/20:4)*	Lipid	Plasmalogen	24769238		HMDB11352		0.851539	591	0.971129	1.0397	0.245266
Var_710	sphingomyelin (d18:2/21:0, d16:2/23:0)*	Lipid	Sphingolipid Metabolism					0.853623	592	0.971861	1.01971	0.13284
Var_334	5,6-dihydrothymine	Nucleotide	Pyrimidine Metabolism, Thymine containing	84456	C00906	HMDB00079	93556	0.853941	593	0.970584	0.985356	0.176814
Var_295	3-aminoisobutyrate	Nucleotide	Pyrimidine Metabolism, Thymine containing	58481	C05145	HMDB03911	64956	0.856637	594	0.972009	0.989766	0.107313
Var_346	5alpha-androstan-3beta,17beta-diol monosulfate (2)	Lipid	Androgenic Steroids					0.859003	595	0.973055	0.912885	0.299775
Var_541	laurate (12:0)	Lipid	Medium Chain Fatty Acid	3756	C02679	HMDB00638	3893	0.860589	596	0.973216	1.00671	0.103951
Var_536	kynurenine	Amino Acid	Tryptophan Metabolism	141580	C00328	HMDB00684	161166	0.863605	597	0.974991	0.996822	0.0682089
Var_509	glycosyl-N-palmitoyl-sphingosine (d18:1/16:0)	Lipid	Ceramides					0.864638	598	0.974525	0.999156	0.110024
Var_285	2-hydroxystearate	Lipid	Fatty Acid, Monohydroxy	62625	C03045		69417	0.865052	599	0.973364	1.02088	0.308581
Var_322	3beta-hydroxy-5-cholestenoate	Lipid	Sterol		C17333		165511	0.86617	600	0.972997	0.934024	0.310646
Var_602	N-nervonoyl-sphingadiene (d18:2/24:1)*	Lipid	Sphingolipid Metabolism					0.868933	601	0.974477	1.00031	0.0718664
Var_654	phenol sulfate	Amino Acid	Tyrosine Metabolism	67018	C02180	HMDB60015	74426	0.870053	602	0.974113	1.00196	0.0413609
Var_271	17-methylstearate	Lipid	Fatty Acid, Branched	2340933		HMDB37397	3083779	0.87471	603	0.977702	1.01936	0.265456
Var_171	isovalerate	Amino Acid	Leucine, Isoleucine and Valine Metabolism	10001	C08262	HMDB00718	10430	0.876605	604	0.978198	0.970287	0.517937
Var_661	phytanate	Xenobiotics	Food Component/Plant	10140204	C01607	HMDB00801	26840	0.879016	605	0.979267	1.07226	0.342964
Var_333	4-vinylphenol sulfate	Xenobiotics	Benzoate Metabolism	4932200	C05627	HMDB04072	6426766	0.879019	606	0.977654	1.02596	0.136969
Var_559	maleate	Lipid	Fatty Acid, Dicarboxylate	392248	C01384	HMDB00176	444266	0.879615	607	0.976706	1.02984	0.205397
Var_383	argininate*	Amino Acid	Urea cycle; Arginine and Proline Metabolism	140984		HMDB03148	160437	0.880476	608	0.976054	0.984009	0.0813406
Var_102	2'-deoxyuridine	Nucleotide	Pyrimidine Metabolism, Uracil containing	13118	C00526	HMDB00012	13712	0.882543	609	0.976739	1.01758	0.395776
Var_459	erucate (22:1n9)	Lipid	Long Chain Fatty Acid	7924	C08316	HMDB02068	5281116	0.890117	610	0.983507	0.980441	0.216159
Var_356	aconitate [cis or trans]	Energy	TCA Cycle					0.891275	611	0.983174	0.973608	0.257596
Var_406	ceramide (d16:1/24:1, d18:1/22:1)*	Lipid	Ceramides					0.891977	612	0.982341	0.988018	0.151598
Var_287	2-linoleoylglycerol (18:2)	Lipid	Monoacylglycerol	4517636		HMDB11538	5365676	0.893123	613	0.981999	1.1463	0.484712
Var_513	guanidinoacetate	Amino Acid	Creatine Metabolism	743	C00581	HMDB00128	763	0.894194	614	0.981575	1.01187	0.136375
Var_368	andro steroid monosulfate C19H28O6S (1)*	Lipid	Androgenic Steroids		C04555	HMDB02759		0.894671	615	0.980501	1.00039	0.301796
Var_467	gamma-glutamyl-2-aminobutyrate	Peptide	Gamma-glutamyl Amino Acid	21403151				0.894778	616	0.979026	1.07074	0.290153
Var_364	alpha-hydroxyisocaproate	Amino Acid	Leucine, Isoleucine and Valine Metabolism	75520	C03264	HMDB00746	83697	0.8948	617	0.977464	1.03548	0.287479
Var_104	5-(galactosylhydroxy)-L-lysine	Amino Acid	Lysine Metabolism					0.89498	618	0.976078	0.915602	0.575944
Var_388	behenoyl dihydrosphingomyelin (d18:0/22:0)*	Lipid	Sphingolipid Metabolism	24846880		HMDB12091		0.897399	619	0.977135	0.992776	0.0896033
Var_675	pyroglutamine*	Amino Acid	Glutamate Metabolism	118562			134508	0.898308	620	0.976548	0.996963	0.0740191
Var_731	theobromine	Xenobiotics	Xanthine Metabolism	5236	C07480	HMDB02825	5429	0.90237	621	0.979384	1.00484	0.0881028
Var_202	1-(1-enyl-stearoyl)-2-linoleoyl-GPE (P-18:0/18:2)*	Lipid	Plasmalogen	24769261		HMDB11376		0.906193	622	0.981952	0.994977	0.156159
Var_581	N-acetylcarnosine	Peptide	Dipeptide Derivative	8079136		HMDB12881	9903482	0.906958	623	0.981204	0.996124	0.0939932
Var_644	palmitoloelycholine	Lipid	Fatty Acid Metabolism (Acyl Choline)					0.907261	624	0.979958	1.00271	0.200265
Var_389	behenoyl sphingomyelin (d18:1/22:0)*	Lipid	Sphingolipid Metabolism	24846873		HMDB12103		0.908864	625	0.980119	1.02254	0.220723
Var_618	nervonate (24:1n9)*	Lipid	Long Chain Fatty Acid	4444565	C08323	HMDB02368	5281120	0.909191	626	0.978906	0.95788	0.223981
Var_152	2-oleoylglycerol (18:1)	Lipid	Monoacylglycerol	4478086		HMDB11537	5319879	0.909246	627	0.977404	1.08401	0.593384
Var_143	vanillylmandelate (VMA)	Amino Acid	Tyrosine Metabolism	1207	C05584	HMDB00291	1245	0.913184	628	0.980073	1.00358	0.323676
Var_712	sphingomyelin (d18:2/23:1)*	Lipid	Sphingolipid Metabolism					0.917691	629	0.983344	1.00629	0.103367
Var_448	docosapentaenoate (n3 DPA; 22:5n3)	Lipid	Polyunsaturated Fatty Acid (n3 and n6)		C16513	HMDB06528	6441454	0.920223	630	0.984493	0.955233	0.496553
Var_242	1-palmitoyl-2-oleoyl-GPE (16:0/18:1)	Lipid	Phosphatidylethanolamine (PE)	4446615		HMDB05320	5283496	0.921666	631	0.984474	0.963719	0.29912
Var_325	4-cholesten-3-one	Lipid	Sterol	427	C00599	HMDB00921	91477	0.923272	632	0.984628	1.00856	0.166675
Var_418	citrate	Energy	TCA Cycle	305	C00158	HMDB00094	311	0.924431	633	0.984308	1.0385	0.181865
Var_262	10-heptadecenoate (17:1n7)	Lipid	Long Chain Fatty Acid	4471860		HMDB60038	5312435	0.926396	634	0.984844	0.953777	0.435501
Var_704	sphingomyelin (d18:1/22:2, d18:2/22:1, d16:1/24:2)*	Lipid	Sphingolipid Metabolism					0.928478	635	0.985502	1.0102	0.183345
Var_185	(N(1) + N(8))-acetylspermidine	Amino Acid	Polyamine Metabolism					0.92877	636	0.984263	1.00809	0.188229
Var_505	glycosyl ceramide (d18:1/20:0, d16:1/22:0)*	Lipid	Ceramides					0.92893	637	0.982887	1.00293	0.0583056
Var_740	tricosanoyl sphingomyelin (d18:1/23:0)*	Lipid	Sphingolipid Metabolism			HMDB12105		0.933759	638	0.986447	0.992367	0.102268
Var_693	sphingomyelin (d18:0/18:0, d19:0/17:0)*	Lipid	Sphingolipid Metabolism	24846878		HMDB12087		0.933787	639	0.984933	0.985489	0.0642631
Var_450	dopamine 3-O-sulfate	Amino Acid	Tyrosine Metabolism	108936	C13690	HMDB06275	122136	0.934664	640	0.984318	0.969239	0.266928
Var_554	linoleoyl-linoleoyl-glycerol (18:2/18:2) [1]*	Lipid	Diacylglycerol			HMDB07248		0.934728	641	0.98285	1.11084	0.398455
Var_533	isoursodeoxycholate	Lipid	Secondary Bile Acid Metabolism	113205	C17662	HMDB00686	127601	0.935231	642	0.981847	0.916972	0.209807
Var_275	2-aminoheptanoate	Lipid	Fatty Acid, Amino	198338			227939	0.935535	643	0.980639	0.994408	0.171668
Var_219	1-linoleoyl-GPI (18:2)*	Lipid	Lysophospholipid					0.936522	644	0.980149	1.01607	0.215584
Var_225	1-myristoyl-2-palmitoyl-GPC (14:0/16:0)	Lipid	Phosphatidylcholine (PC)	114798		HMDB07869	129657	0.937855	645	0.980022	0.984667	0.110079
Var_673	pyridoxal	Cofactors and Vitamins	Vitamin B6 Metabolism	1021	C00250	HMDB01545	1050	0.93924	646	0.97995	0.998201	0.264772
Var_259	1-stearoyl-2-oleoyl-GPE (18:0/18:1)	Lipid	Phosphatidylethanolamine (PE)			HMDB08993		0.940599	647	0.979851	0.905382	0.363404
Var_453	eicosanodioate	Lipid	Fatty Acid, Dicarboxylate	68030			75502	0.941032	648	0.978789	0.938959	0.254795
Var_359	adipoylcarnitine (C6-DC)	Lipid	Fatty Acid Metabolism(Acyl Carnitine)	28540385		HMDB61677	71296139	0.942233	649	0.978529	0.975814	0.276644
Var_684	salicylate	Xenobiotics	Drug	331	C00805	HMDB01895	338	0.947353	650	0.982332	1.02659	0.223742
Var_391	beta-cryptoxanthin	Xenobiotics	Food Component/Plant	4904571		HMDB33844	6384256	0.94899	651	0.982518	1.01855	0.117054
Var_493	glycerophosphoinositol*	Lipid	Phospholipid Metabolism				167572	0.953694	652	0.985874	1.02314	0.357475
Var_691	sphingomyelin (d17:1/16:0, d18:1/15:0, d16:1/17:0)*	Lipid	Sphingolipid Metabolism	28532779				0.955372	653	0.986096	1.00473	0.129054
Var_164	gamma-glutamyl-epsilon-lysine	Peptide	Gamma-glutamyl Amino Acid	5378717		HMDB03869	7015685	0.961184	654	0.990578	0.969341	0.364883
Var_668	pristanate	Lipid	Fatty Acid, Branched	110458		HMDB00795	123929	0.966671	655	0.994712	1.05269	0.360607
Var_146	13-HODE + 9-HODE	Lipid	Fatty Acid, Monohydroxy				43013	0.967928	656	0.994487	1.06097	1.04779
Var_696	sphingomyelin (d18:1/17:0, d17:1/18:0, d19:1/16:0)	Lipid	Sphingolipid Metabolism					0.969234	657	0.994313	1.00254	0.120856
Var_408	ceramide (d18:1/17:0, d17:1/18:0)*	Lipid	Ceramides					0.97072	658	0.994324	0.997503	0.221262
Var_411	cholate	Lipid	Primary Bile Acid Metabolism		C00695	HMDB00619	221493	0.970815	659	0.992913	0.879938	0.124254
Var_303	3-hydroxyisobutyrate	Amino Acid	Leucine, Isoleucine and Valine Metabolism	10140307	C06001	HMDB00336	87	0.971117	660	0.991716	0.898601	0.394203
Var_234	1-palmitoyl-2-arachidonoyl-GPE (16:0/20:4)*	Lipid	Phosphatidylethanolamine (PE)	7825750		HMDB05323	9546800	0.971756	661	0.990868	1.00653	0.150009
Var_672	pseudouridine	Nucleotide	Pyrimidine Metabolism, Uracil containing	21403010	C02067	HMDB00767	15047	0.974253	662	0.991913	0.99215	0.20416
Var_365	alpha-hydroxyisovalerate	Amino Acid	Leucine, Isoleucine and Valine Metabolism	90190		HMDB00407	99823	0.976528	663	0.99273	1.00444	0.229339
Var_229	1-oleoyl-GPE (18:1)	Lipid	Lysophospholipid	7826021		HMDB11506	9547071	0.977632	664	0.992356	0.991051	0.170801
Var_387	behenate (22:0)*	Lipid	Long Chain Fatty Acid	7923	C08281	HMDB00944	8215	0.978229	665	0.991468	0.985033	0.274447
Var_129	5alpha-androstan-3beta,17alpha-diol disulfate	Lipid	Androgenic Steroids					0.98006	666	0.991832	1.02861	0.168232
Var_274	2-aminobutyrate	Amino Acid	Glutathione Metabolism	388757	C02261	HMDB00650	439691	0.983956	667	0.994282	0.993919	0.0653894
Var_239	1-palmitoyl-2-linoleoyl-GPE (16:0/18:2)	Lipid	Phosphatidylethanolamine (PE)	7825697		HMDB05322	9546747	0.984156	668	0.992996	0.927468	0.341852
Var_074	N6-carboxymethyllysine	Carbohydrate	Advanced Glycation End-product	11217184			123800	0.993068	669	1.00049	0.943725	0.362501
Var_739	trans-urocanate	Amino Acid	Histidine Metabolism	643824	C00785	HMDB00301	736715	0.99362	670	0.999552	0.966599	0.36442
Var_154	3-hydroxybutyrylcarnitine (2)	Lipid	Fatty Acid Metabolism(Acyl Carnitine)			HMDB13127		0.996758	671	1.00121	0.983414	0.279178
Var_496	glycochenodeoxycholate	Lipid	Primary Bile Acid Metabolism		C05466	HMDB00637	12544	0.997493	672	1.00046	0.995001	0.112551
Var_620	nonadecanoate (19:0)	Lipid	Long Chain Fatty Acid	12071	C16535	HMDB00772	12591	0.997821	673	0.999304	1.00991	0.180044
Var_562	margarate (17:0)	Lipid	Long Chain Fatty Acid	10033		HMDB02259	10465	0.999634	674	0.999634	1.02393	0.179942

## Sheet: Pathway Analysis
KEGG Pathway	Total	Expected	Hits	Raw p	-log10(p)	Holm adjust	FDR	Impact
Alanine, aspartate and glutamate metabolism	24	0.38887	5	2.9131e-05	10.444	0.0023305	0.0023305	0.45714
Cyanoamino acid metabolism	16	0.25924	4	9.3233e-05	9.2804	0.0073654	0.0037293	0.24999
Aminoacyl-tRNA biosynthesis	75	1.2152	7	0.00014861	8.8142	0.011591	0.0039628	0.1613
Nitrogen metabolism	39	0.63191	5	0.00033027	8.0156	0.025431	0.0066054	0.17307
Purine metabolism	92	1.4907	7	0.00053596	7.5315	0.040733	0.0077774	0.07857
Sphingolipid metabolism	25	0.40507	4	0.00058331	7.4468	0.043748	0.0077774	0.25
Glycine, serine and threonine metabolism	48	0.77773	5	0.00088276	7.0325	0.065325	0.010089	0.32203
D-Arginine and D-ornithine metabolism	8	0.12962	2	0.0067366	5.0002	0.49177	0.064209	0.57143
Arginine and proline metabolism	77	1.2476	5	0.0072235	4.9304	0.52009	0.064209	0.19417
Taurine and hypotaurine metabolism	20	0.32405	2	0.040451	3.2077	1	0.32361	0.30435
Cysteine and methionine metabolism	56	0.90735	3	0.060425	2.8063	1	0.43946	0.04939
Methane metabolism	34	0.55089	2	0.10377	2.2656	1	0.67056	0.02083
Propanoate metabolism	35	0.5671	2	0.10897	2.2167	1	0.67056	0.0625
Glutathione metabolism	38	0.6157	2	0.12496	2.0797	1	0.67965	0.03226
Glycerophospholipid metabolism	39	0.63191	2	0.13042	2.037	1	0.67965	0.0548
Butanoate metabolism	40	0.64811	2	0.13593	1.9956	1	0.67965	0.02
Nicotinate and nicotinamide metabolism	44	0.71292	2	0.15848	1.8422	1	0.69384	0.01818
Histidine metabolism	44	0.71292	2	0.15848	1.8422	1	0.69384	0.02
D-Glutamine and D-glutamate metabolism	11	0.17823	1	0.16479	1.8031	1	0.69384	0.16667
Primary bile acid biosynthesis	47	0.76153	2	0.17583	1.7382	1	0.70331	0.07018
Pyrimidine metabolism	60	0.97216	2	0.25368	1.3717	1	0.92922	0.02062
Sulfur metabolism	18	0.29165	1	0.25554	1.3644	1	0.92922	0.03704
Citrate cycle (TCA cycle)	20	0.32405	1	0.27965	1.2742	1	0.97139	0
Caffeine metabolism	21	0.34026	1	0.29142	1.233	1	0.97139	0
Thiamine metabolism	24	0.38887	1	0.32561	1.122	1	1	0.03448
Pantothenate and CoA biosynthesis	27	0.43747	1	0.3582	1.0267	1	1	0.0303
Valine, leucine and isoleucine biosynthesis	27	0.43747	1	0.3582	1.0267	1	1	0.03704
beta-Alanine metabolism	28	0.45368	1	0.36872	0.99773	1	1	0.0303
Glycolysis or Gluconeogenesis	31	0.50229	1	0.39927	0.91812	1	1	0.02326
Lysine biosynthesis	32	0.51849	1	0.40913	0.89372	1	1	0.02857
Pyruvate metabolism	32	0.51849	1	0.40913	0.89372	1	1	0.05263
Porphyrin and chlorophyll metabolism	104	1.6851	2	0.50852	0.67626	1	1	0.01754
Phenylalanine metabolism	45	0.72912	1	0.52382	0.64661	1	1	0
Lysine degradation	47	0.76153	1	0.53942	0.61727	1	1	0
Arachidonic acid metabolism	62	1.0046	1	0.64155	0.44387	1	1	0.01639
Tyrosine metabolism	76	1.2314	1	0.71675	0.33303	1	1	0
Tryptophan metabolism	79	1.28	1	0.73073	0.31371	1	1	0.05952

## Sheet: Pathway distribution
KEGG Pathway	Hits	Annotated Compounds
Alanine, aspartate and glutamate metabolism	5	Asparagine	Aspartate	Fumaric acid	Glutamate	N-carbamoylaspartate
Cyanoamino acid metabolism	4	Asparagine	Aspartate	Glycine	Serine
Aminoacyl-tRNA biosynthesis	7	Arginine	Asparagine	Aspartate	Glutamate	Glycine	Proline	Serine
Nitrogen metabolism	5	Asparagine	Aspartate	Glutamate	Glycine	Taurine
Purine metabolism	7	Adenosine	cyclic AMP	Glycine	Guanosine	Hypoxanthine	Inosine	Xanthine
Sphingolipid metabolism	4	Serine	Sphinganine	Sphingosine	Sphingosine-1-phosphate
Glycine, serine and threonine metabolism	5	2-ketobutyrate	Aspartate	Choline	Glycine	Serine
D-Arginine and D-Ornithine metabolism	2	Arginine	Ornithine
Arginine and proline metabolism	5	Arginine	Aspartate	Fumaric acid	Glutamate	Proline
Taurine and hypotaurine metabolism	2	Hypotaurine	Taurine
			DOWN
			UP

## Sheet: ChemRICH Input
Compound Name	InChiKeys	Pubchem ID	SMILES	pvalue	foldchange
acetylcarnitine (C2)	RDHQFKQIGNGIED-UHFFFAOYSA-N	1	CC(=O)OC(CC(=O)[O-])C[N+](C)(C)C	0.339295	0.921251
2-hydroxyglutarate	HWXBTNAVRSUOJR-UHFFFAOYSA-N	43	C(CC(=O)O)C(C(=O)O)O	0.433801	1.0232
tartronate (hydroxymalonate)	ROBFUDYVXSDBQM-UHFFFAOYSA-N	45	C(C(=O)O)(C(=O)O)O	0.0486227	0.856926
3-methyl-2-oxovalerate	JVQYSWDUAOAHFM-UHFFFAOYSA-N	47	CCC(C)C(=O)C(=O)O	0.466429	0.97356
3-methyl-2-oxobutyrate	QHKABHOOEWYVLI-UHFFFAOYSA-N	49	CC(C)C(=O)C(=O)O	0.302405	0.95148
alpha-ketoglutarate	KPGXRSRHYNQIFN-UHFFFAOYSA-N	51	C(CC(=O)O)C(=O)C(=O)O	0.505065	1.01465
alpha-ketobutyrate	TYEYBOSBBBHJIV-UHFFFAOYSA-N	58	CCC(=O)C(=O)O	0.000507491	0.670258
4-methyl-2-oxopentanoate	BKAJNAXTPSGJCU-UHFFFAOYSA-N	70	CC(C)CC(=O)C(=O)O	0.167168	0.941004
2-isopropylmalate	BITYXLXUCSKTJS-UHFFFAOYSA-N	77	CC(C)C(CC(=O)O)(C(=O)O)O	0.255863	0.931751
3-hydroxyisobutyrate	DBXBTMSZEOQQDU-UHFFFAOYSA-N	87	CC(CO)C(=O)O	0.971117	0.898601
3-(3-hydroxyphenyl)propionate	QVWAEZJXDYOKEH-UHFFFAOYSA-N	91	C1=CC(=CC(=C1)O)CCC(=O)O	0.814856	0.96574
acetoacetate	WDJHALXBUFZDSR-UHFFFAOYSA-N	96	CC(=O)CC(=O)O	0.077929	0.792231
3-phenylpropionate (hydrocinnamate)	XMIIGOLPHOKFCH-UHFFFAOYSA-N	107	C1=CC=C(C=C1)CCC(=O)O	0.808495	1.05954
cysteine sulfinic acid	ADVPTQAUNPRNPO-UHFFFAOYSA-N	109	C(C(C(=O)O)N)S(=O)O	0.491524	1.03045
3-ureidopropionate	JSJWCHRYRHKBBW-UHFFFAOYSA-N	111	C(CNC(=O)N)C(=O)O	0.421981	1.068
deoxycarnitine	JHPNVNIEXXLNTR-UHFFFAOYSA-O	134	C[N+](C)(C)CCCC(=O)O	0.0284577	1.03011
adenine	GFFGJBXGBJISGV-UHFFFAOYSA-N	190	C1=NC2=C(N1)C(=NC=N2)N	0.576576	1.16696
adipate	WNLRTRBMVRJNCN-UHFFFAOYSA-N	196	C(CCC(=O)O)CC(=O)O	0.811841	0.927435
allantoin	POJWUDADGALRAB-UHFFFAOYSA-N	204	C1(C(=O)NC(=O)N1)NC(=O)N	0.00158351	1.50279
anthranilate	RWZYAGGXGHYGMB-UHFFFAOYSA-N	227	C1=CC=C(C(=C1)C(=O)O)N	0.476988	1.01258
arginine	ODKSFYDXXFIFQN-UHFFFAOYSA-N	232	C(CC(C(=O)O)N)CN=C(N)N	0.000577013	0.888164
beta-alanine	UCMIRNVEIXFBKS-UHFFFAOYSA-N	239	C(CN)C(=O)O	0.268687	1.07418
benzoate	WPYMKLBDIGXBTP-UHFFFAOYSA-N	243	C1=CC=C(C=C1)C(=O)O	0.212939	1.21991
betaine	KWIUHFFTVRNATP-UHFFFAOYSA-N	247	C[N+](C)(C)CC(=O)[O-]	0.626005	1.00298
choline	OEYIOHPDSNJKLS-UHFFFAOYSA-N	305	C[N+](C)(C)CCO	0.00271966	1.21898
citrate	KRKNYBCHXYNGOX-UHFFFAOYSA-N	311	C(C(=O)O)C(CC(=O)O)(C(=O)O)O	0.924431	1.0385
salicylate	YGSDEFSMJLZEOE-UHFFFAOYSA-N	338	C1=CC=C(C(=C1)C(=O)O)O	0.947353	1.02659
caprylate (8:0)	WWZKQHOCKIZLMA-UHFFFAOYSA-N	379	CCCCCCCC(=O)O	0.240318	1.01419
3-hydroxybutyrate (BHBA)	WHBMMWSBFZVSSR-UHFFFAOYSA-N	441	CC(CC(=O)O)O	0.0364618	0.913704
palmitoylcarnitine (C16)	XOMRRQXKHMYMOC-UHFFFAOYSA-N	461	CCCCCCCCCCCCCCCC(=O)OC(CC(=O)[O-])C[N+](C)(C)C	0.0123169	1.15522
hippurate	QIAFMBKCNZACKA-UHFFFAOYSA-N	464	C1=CC=C(C=C1)C(=O)NCC(=O)O	0.402661	0.96623
2-aminoadipate	OYIFNHCXNCRBQI-UHFFFAOYSA-N	469	C(CC(C(=O)O)N)CC(=O)O	0.335395	1.07201
methylmalonate (MMA)	ZIYVHBGGAOATLY-UHFFFAOYSA-N	487	CC(C(=O)O)C(=O)O	0.776547	1.00077
4-guanidinobutanoate	TUHVEAJXIMEOSA-UHFFFAOYSA-N	500	C(CC(=O)O)CN=C(N)N	0.00581583	1.16262
malate	BJEPYKJPYRNKOW-UHFFFAOYSA-N	525	C(C(C(=O)O)O)C(=O)O	0.0371964	1.11421
N-methylproline	CWLQUGTUXBXTLF-UHFFFAOYSA-N	557	CN1CCCC1C(=O)O	0.799715	0.99092
2-oxoarginine*	ARBHXJXXVVHMET-UHFFFAOYSA-N	558	C(CC(=O)C(=O)O)CN=C(N)N	0.606944	0.936145
creatine	CVSVTCORWBXHQV-UHFFFAOYSA-N	586	CN(CC(=O)O)C(=N)N	0.264967	1.02416
creatinine	DDRJAANPRJIHGJ-UHFFFAOYSA-N	588	CN1CC(=O)N=C1N	0.369392	1.01453
glutamate	WHUUTDBJXJRKMK-UHFFFAOYSA-N	611	C(CC(=O)O)C(C(=O)O)N	8.88548e-06	1.552
lactate	JVTAAEKCZFNVCJ-UHFFFAOYSA-N	612	CC(C(=O)O)O	1.4346e-05	1.38738
dihydroorotate	UFIVEPVSAGBUSI-UHFFFAOYSA-N	648	C1C(NC(=O)NC1=O)C(=O)O	0.000189341	1.27804
dimethylglycine	FFDGPVCHZBVARC-UHFFFAOYSA-N	673	CN(C)CC(=O)O	0.828134	1.00435
2,3-dihydroxyisovalerate	JTEYKUFKXGDTEU-UHFFFAOYSA-N	677	CC(C)(C(C(=O)O)O)O	0.168789	1.06377
dimethyl sulfoxide (DMSO)	IAZDPXIOMUYVGZ-UHFFFAOYSA-N	679	CS(=O)C	0.257723	1.13621
glutarate (pentanedioate)	JFCQEDHGNNZCLN-UHFFFAOYSA-N	743	C(CC(=O)O)CC(=O)O	0.118395	1.07928
glycine	DHMQDGOQFOQNFH-UHFFFAOYSA-N	750	C(C(=O)O)N	0.00196117	1.05089
glycerate	RBNPOMFGQQGHHO-UHFFFAOYSA-N	752	C(C(C(=O)O)O)O	0.00725002	1.09148
glycerol	PEDCQBHIVMGVHV-UHFFFAOYSA-N	753	C(C(CO)O)O	0.139051	0.929304
glycerol 3-phosphate	AWUCVROLDVIAJX-UHFFFAOYSA-N	754	C(C(COP(=O)(O)O)O)O	0.179448	1.30043
guanidinoacetate	BPMFZUMJYQTVII-UHFFFAOYSA-N	763	C(C(=O)O)N=C(N)N	0.894194	1.01187
hydantoin-5-propionic acid	VWFWNXQAMGDPGG-UHFFFAOYSA-N	782	C(CC(=O)O)C1C(=O)NC(=O)N1	0.623276	1.03054
hypoxanthine	FDGQSTZJBFJUBT-UHFFFAOYSA-N	135398638	C1=NC2=C(N1)C(=O)N=CN2	0.000152575	1.41664
indoleacetate	SEOVTRFCIGRIMH-UHFFFAOYSA-N	802	C1=CC=C2C(=C1)C(=CN2)CC(=O)O	0.816392	0.996868
pipecolate	HXEACLLIILLPRG-UHFFFAOYSA-N	849	C1CCNC(C1)C(=O)O	0.140867	1.02998
malonate	OFOBLEOULBTSOW-UHFFFAOYSA-N	867	C(C(=O)O)C(=O)O	0.386425	0.986187
myo-inositol	CDAISMWEOUEBRE-UHFFFAOYSA-N	892	C1(C(C(C(C(C1O)O)O)O)O)O	0.0235658	1.15638
nicotinamide	DFPAKSUCGFBDDF-UHFFFAOYSA-N	936	C1=CC(=CN=C1)C(=O)N	0.0274934	1.16365
orotate	PXQPEWDEAKTCGB-UHFFFAOYSA-N	967	C1=C(NC(=O)NC1=O)C(=O)O	0.182015	1.08227
oxalate (ethanedioate)	MUBZPKHOEPUJKR-UHFFFAOYSA-N	971	C(=O)(C(=O)O)O	0.234165	0.892188
4-hydroxyphenylpyruvate	KKADPXVIOXHVKN-UHFFFAOYSA-N	979	C1=CC(=CC=C1CC(=O)C(=O)O)O	0.0701684	0.814952
palmitate (16:0)	IPCSVZSSVZVIGE-UHFFFAOYSA-N	985	CCCCCCCCCCCCCCCC(=O)O	0.283829	1.02615
phenylpyruvate	BTNMPGBKDVTSJY-UHFFFAOYSA-N	997	C1=CC=C(C=C1)CC(=O)C(=O)O	0.668996	1.01763
choline phosphate	YHHSONZFOIEMCP-UHFFFAOYSA-O	1014	C[N+](C)(C)CCOP(=O)(O)O	0.622136	0.970564
phosphoethanolamine	SUHOOTKUPISOBE-UHFFFAOYSA-N	1015	C(COP(=O)(O)O)N	0.011209	1.35705
pyridoxal	RADKZDMFGJYCBB-UHFFFAOYSA-N	1050	CC1=NC=C(C(=C1O)C=O)CO	0.93924	0.998201
pyruvate	LCTONWCANYUPML-UHFFFAOYSA-N	1060	CC(=O)C(=O)O	0.0312696	0.873579
phosphate	NBIIXXVUZAFLBC-UHFFFAOYSA-K	1061	[O-]P(=O)([O-])[O-]	0.368465	0.963785
quinolinate	GJAWHXHKYYXBSV-UHFFFAOYSA-N	1066	C1=CC(=C(N=C1)C(=O)O)C(=O)O	0.605391	1.07186
sarcosine	FSYKKLYZXJSNPZ-UHFFFAOYSA-N	1088	CNCC(=O)O	0.138946	0.981294
spermidine	ATHGHQPFGPMSJY-UHFFFAOYSA-N	1102	C(CCNCCCN)CN	0.271595	1.07139
succinate	KDYFGRWQOYBRFD-UHFFFAOYSA-N	1110	C(CC(=O)O)C(=O)O	0.0167066	1.07158
sulfate*	QAOWNCQODCNURD-UHFFFAOYSA-N	1118	OS(=O)(=O)O	0.263835	0.934525
taurine	XOAAWQZATWQOTB-UHFFFAOYSA-N	1123	C(CS(=O)(=O)O)N	4.47597e-08	1.3966
trimethylamine N-oxide	UYPYRKYUKCHHIB-UHFFFAOYSA-N	1145	C[N+](C)(C)[O-]	0.462596	1.01561
urate	LEHOTFFKMJEONL-UHFFFAOYSA-N	1175	C12=C(NC(=O)N1)NC(=O)NC2=O	0.335968	0.939339
urea	XSQUKJJJFZCRTK-UHFFFAOYSA-N	1176	C(=O)(N)N	0.734722	1.00372
xanthine	LRFVTYWOQMYALW-UHFFFAOYSA-N	1188	C1=NC2=C(N1)C(=O)NC(=O)N2	0.0005146	1.57241
S-1-pyrroline-5-carboxylate	DWAKNKKXGALPNW-UHFFFAOYSA-N	1196	C1CC(N=C1)C(=O)O	3.04633e-05	0.678485
isocitrate	ODBLHEXUDAPZAU-UHFFFAOYSA-N	1198	C(C(C(C(=O)O)O)C(=O)O)C(=O)O	0.255956	0.928097
vanillylmandelate (VMA)	CGQCWMIAEPEHNQ-UHFFFAOYSA-N	1245	COC1=C(C=CC(=C1)C(C(=O)O)O)O	0.913184	1.00358
3-hydroxy-3-methylglutarate	NPOAOTPXWNWTSH-UHFFFAOYSA-N	1662	CC(CC(=O)O)(CC(=O)O)O	0.0742391	1.0951
3-methoxytyrosine	PFDUUKDQEHURQC-UHFFFAOYSA-N	1670	COC1=C(C=CC(=C1)CC(C(=O)O)N)O	0.340532	0.972756
theophylline	ZFXYFBGIUFBOJW-UHFFFAOYSA-N	2153	CN1C2=C(C(=O)N(C1=O)C)NC=N2	0.197537	0.996532
azelate (nonanedioate)	BDJRBEYXGGNYIS-UHFFFAOYSA-N	2266	C(CCCC(=O)O)CCCC(=O)O	0.00137125	1.5508
caffeine	RYYVLZVUVIJVGH-UHFFFAOYSA-N	2519	CN1C=NC2=C1C(=O)N(C(=O)N2C)C	0.188491	0.999209
carboxyethyl-GABA	SRGQUICKDUQCKO-UHFFFAOYSA-N	2572	C(CC(=O)O)CNCCC(=O)O	0.4548	1.04597
caprate (10:0)	GHVNFZFCNZKVNT-UHFFFAOYSA-N	2969	CCCCCCCCCC(=O)O	0.342966	1.02788
sphinganine	OTKJDMGTUTTYMP-UHFFFAOYSA-N	3126	CCCCCCCCCCCCCCCC(C(CO)N)O	2.50505e-05	1.26803
gentisate	WXTMDXOMEHJXQO-UHFFFAOYSA-N	3469	C1=CC(=C(C=C1O)C(=O)O)O	0.468797	1.1066
indolepropionate	GOLXRNDWAUTYKT-UHFFFAOYSA-N	3744	C1=CC=C2C(=C1)C(=CN2)CCC(=O)O	0.60177	0.985345
kynurenate	HCZHHEIFKROPDY-UHFFFAOYSA-N	3845	C1=CC=C2C(=C1)C(=O)C=C(N2)C(=O)O	0.187464	0.935001
phenyllactate (PLA)	VOXXWSYKYCBWHO-UHFFFAOYSA-N	3848	C1=CC=C(C=C1)CC(C(=O)O)O	0.733137	0.989669
laurate (12:0)	POULHZVOKOAJMA-UHFFFAOYSA-N	3893	CCCCCCCCCCCC(=O)O	0.860589	1.00671
palmitoyl ethanolamide	HXYVTAGFYLMHSO-UHFFFAOYSA-N	4671	CCCCCCCCCCCCCCCC(=O)NCCO	0.116737	1.12054
paraxanthine	QUNWUDVFRNGTCO-UHFFFAOYSA-N	4687	CN1C=NC2=C1C(=O)N(C(=O)N2)C	0.266085	0.909407
sebacate (decanedioate)	CXMXRPHRNRROMY-UHFFFAOYSA-N	5192	C(CCCCC(=O)O)CCCC(=O)O	0.000350072	1.77911
serotonin	QZAYGJVTTNCVMB-UHFFFAOYSA-N	5202	C1=CC2=C(C=C1O)C(=CN2)CCN	1.028e-06	0.717973
N-acetyl-aspartyl-glutamate (NAAG)	OPVPGKGADVGKTG-UHFFFAOYSA-N	5255	CC(=O)NC(CC(=O)O)C(=O)NC(CCC(=O)O)C(=O)O	0.344581	0.875416
stearate (18:0)	QIQXTHQIDYTFRH-UHFFFAOYSA-N	5281	CCCCCCCCCCCCCCCCCC(=O)O	0.447669	1.06988
theobromine	YAPQBXQYLJRXSA-UHFFFAOYSA-N	5429	CN1C=NC2=C1C(=O)NC(=O)N2C	0.90237	1.00484
trigonelline (N'-methylnicotinate)	WWNNZCOKKKDOPX-UHFFFAOYSA-N	5570	C[N+]1=CC=CC(=C1)C(=O)[O-]	0.412289	1.00901
xanthurenate	FBZONXHGGPHHIY-UHFFFAOYSA-N	5699	C1=CC2=C(C(=C1)O)NC(=CC2=O)C(=O)O	0.0458555	1.08146
cortisol	JYGXADMDTFJGBT-VWUMJDOOSA-N	5754	C[C@]12CCC(=O)C=C1CC[C@@H]3[C@@H]2[C@H](C[C@]4([C@H]3CC[C@@]4(C(=O)CO)O)C)O	0.0913435	0.927009
mannitol/sorbitol	FBPFZTCFMRRESA-JGWLITMVSA-N	5780	C([C@H]([C@H]([C@@H]([C@H](CO)O)O)O)O)O	0.279438	1.04572
trans-4-hydroxyproline	PMMYEEVYMWASQN-DMTCNVIQSA-N	5810	C1[C@H](CN[C@@H]1C(=O)O)O	0.290024	1.02313
thyroxine	XUIIKFGFIJCVMT-LBPRGKRZSA-N	5819	C1=C(C=C(C(=C1I)OC2=CC(=C(C(=C2)I)O)I)I)C[C@@H](C(=O)O)N	0.667008	1.02324
cysteine	XUJNEKJLAYXESH-REOHCLBHSA-N	5862	C([C@@H](C(=O)O)N)S	0.101652	0.929516
alanine	QNAYBMKLOCPYGJ-REOHCLBHSA-N	5950	C[C@@H](C(=O)O)N	0.0186022	1.02979
serine	MTCFGRXMJLQNBG-REOHCLBHSA-N	5951	C([C@@H](C(=O)O)N)O	0.000222019	1.10707
aspartate	CKLJMWTZIZZHCS-REOHCLBHSA-N	5960	C([C@@H](C(=O)O)N)C(=O)O	6.55602e-10	1.93356
glutamine	ZDXPYRJPNDTMRX-VKHMYHEASA-N	5961	C(CC(=O)N)[C@@H](C(=O)O)N	0.392692	0.989713
lysine	KDXKERNSBIXSRK-YFKPBYRVSA-N	5962	C(CCN)C[C@@H](C(=O)O)N	0.00865876	1.0478
fructose	BJHIKXHVCXFQLS-UYFOZJQFSA-N	5984	C([C@H]([C@H]([C@@H](C(=O)CO)O)O)O)O	0.297923	0.938374
uridine	DRTQHJPVMGBUCF-XVFCMESISA-N	6029	C1=CN(C(=O)NC1=O)[C@H]2[C@@H]([C@@H]([C@H](O2)CO)O)O	0.519367	0.925394
tyrosine	OUYCCCASQSFEME-QMMMGPOBSA-N	6057	C1=CC(=CC=C1C[C@@H](C(=O)O)N)O	0.405406	1.01151
adenosine 3',5'-cyclic monophosphate (cAMP)	IVOMOUWHDPKRLL-KQYNXXCUSA-N	6076	C1[C@@H]2[C@H]([C@H]([C@@H](O2)N3C=NC4=C3N=CN=C4N)O)OP(=O)(O1)O	0.000537884	0.650674
leucine	ROHFNLRQFUQHCH-YFKPBYRVSA-N	6106	CC(C)C[C@@H](C(=O)O)N	0.245695	1.02243
methionine	FFEARJCKVFRZRR-BYPYZUCNSA-N	6137	CSCC[C@@H](C(=O)O)N	0.328653	1.01263
phenylalanine	COLNVLDHVKWLRT-QMMMGPOBSA-N	6140	C1=CC=C(C=C1)C[C@@H](C(=O)O)N	0.00617446	1.03969
cytidine	UHDGCWIWMRVCDJ-XVFCMESISA-N	6175	C1=CN(C(=O)N=C1N)[C@H]2[C@@H]([C@@H]([C@H](O2)CO)O)O	0.461995	1.11058
dimethyl sulfone	HHVIBTZHLRERCL-UHFFFAOYSA-N	6213	CS(=O)(=O)C	0.516451	1.07615
ornithine	AHLPHDHHMVZTML-BYPYZUCNSA-N	6262	C(C[C@@H](C(=O)O)N)CN	4.95768e-07	1.3093
asparagine	DCXYFEDJOCDNAF-REOHCLBHSA-N	6267	C([C@@H](C(=O)O)N)C(=O)N	0.000355526	1.07145
histidine	HNDVDQJCIGZPNO-YFKPBYRVSA-N	6274	C1=C(NC=N1)C[C@@H](C(=O)O)N	0.390911	0.964858
valine	KZSNJWFQEVHDMF-BYPYZUCNSA-N	6287	CC(C)[C@@H](C(=O)O)N	0.672062	1.00821
threonine	AYFVYJQAPQTCCC-GBXIJSLDSA-N	6288	C[C@H]([C@@H](C(=O)O)N)O	0.541398	1.00855
tryptophan	QIVBCDIJIAJPQS-VIFPVBQESA-N	6305	C1=CC=C2C(=C1)C(=CN2)C[C@@H](C(=O)O)N	0.0932899	1.02307
isoleucine	AGPKZVBTJJNPAG-WHFBIAKZSA-N	6306	CC[C@H](C)[C@@H](C(=O)O)N	0.175955	1.02324
quinate	AAWZDTNXLSGCEK-LNVDRNJUSA-N	6508	C1[C@H](C([C@@H](CC1(C(=O)O)O)O)O)O	0.658133	1.02939
pantothenate	GHOKWGTUZJEAQD-ZETCQYMHSA-N	6613	CC(C)(CO)[C@H](C(=O)NCCC(=O)O)O	0.597422	0.983245
taurocholate	WBWWGRHZICKQGZ-HZAMXZRMSA-N	6675	C[C@H](CCC(=O)NCCS(=O)(=O)O)[C@H]1CC[C@@H]2[C@@]1([C@H](C[C@H]3[C@H]2[C@@H](C[C@H]4[C@@]3(CC[C@H](C4)O)C)O)O)C	0.418942	0.974594
pyridoxate	HXACOUQIXZGNBF-UHFFFAOYSA-N	6723	CC1=NC=C(C(=C1O)C(=O)O)CO	0.640915	0.933269
arabitol/xylitol	HEBKCHPVOIAQTA-NGQZWQHPSA-N	6912	C([C@H](C([C@H](CO)O)O)O)O	0.0246341	1.10123
5-oxoproline	ODHCTXKNWHHXJC-VKHMYHEASA-N	7405	C1CC(=O)N[C@@H]1C(=O)O	0.010649	1.21683
behenate (22:0)*	UKMSUNONTOPOIO-UHFFFAOYSA-N	8215	CCCCCCCCCCCCCCCCCCCCCC(=O)O	0.978229	0.985033
homoarginine	QUOGESRFPZDMMT-YFKPBYRVSA-N	9085	C(CCN=C(N)N)C[C@@H](C(=O)O)N	0.531452	0.98599
3-(4-hydroxyphenyl)lactate	JVGVDSSUAVXRDY-UHFFFAOYSA-N	9378	C1=CC(=CC=C1CC(C(=O)O)O)O	0.699757	0.992353
citrulline	RHGKLRLOHDJJDR-BYPYZUCNSA-N	9750	C(C[C@@H](C(=O)O)N)CNC(=O)N	0.723014	0.9882
glycocholate	RFDAIACWWDREDC-FRVQLJSFSA-N	10140	C[C@H](CCC(=O)NCC(=O)O)[C@H]1CC[C@@H]2[C@@]1([C@H](C[C@H]3[C@H]2[C@@H](C[C@H]4[C@@]3(CC[C@H](C4)O)C)O)O)C	0.415438	0.965224
2-hydroxyhippurate (salicylurate)	ONJSZLXSECQROL-UHFFFAOYSA-N	10253	C1=CC=C(C(=C1)C(=O)NCC(=O)O)O	0.529788	1.03102
3-indoxyl sulfate	BXFFHSIDQOFMLE-UHFFFAOYSA-N	10258	C1=CC=C2C(=C1)C(=CN2)OS(=O)(=O)O	0.321593	0.909609
methylsuccinate	WXUAQHNMJWJLTG-UHFFFAOYSA-N	10349	CC(CC(=O)O)C(=O)O	0.369029	1.06358
isovalerate	GWYFCOCPABKNJV-UHFFFAOYSA-N	10430	CC(C)CC(=O)O	0.876605	0.970287
suberate (octanedioate)	TYFQFVWCELRYAO-UHFFFAOYSA-N	10457	C(CCCC(=O)O)CCC(=O)O	0.00207262	1.43717
margarate (17:0)	KEMQGTRYUADPNZ-UHFFFAOYSA-N	10465	CCCCCCCCCCCCCCCCC(=O)O	0.999634	1.02393
arachidate (20:0)	VKOBVWXKNCXXDE-UHFFFAOYSA-N	10467	CCCCCCCCCCCCCCCCCCCC(=O)O	0.344481	1.0572
gluconate	RGHNJXZEOKUKBD-SQOUGZDYSA-N	10690	C([C@H]([C@H]([C@@H]([C@H](C(=O)O)O)O)O)O)O	0.594491	1.07546
carnitine	PHIQHXFUZVPYII-ZCFIWIBFSA-N	10917	C[N+](C)(C)C[C@@H](CC(=O)[O-])O	0.0809025	0.981331
N-acetylglycine	OKJIRPAQVSHGFK-UHFFFAOYSA-N	10972	CC(=O)NCC(=O)O	0.722957	0.985834
myristate (14:0)	TUNFSRHWOTWDNC-UHFFFAOYSA-N	11005	CCCCCCCCCCCCCC(=O)O	0.431042	1.04247
succinimide	KZNICNPSHKQLFF-UHFFFAOYSA-N	11439	C1CC(=O)NC1=O	0.740783	1.01758
ethylmalonate	UKFXDFUAPNAMPJ-UHFFFAOYSA-N	11756	CCC(C(=O)O)C(=O)O	0.209124	1.03526
glycochenodeoxycholate	GHCZAUBVMUEKKP-GYPHWSFCSA-N	12544	C[C@H](CCC(=O)NCC(=O)O)[C@H]1CC[C@@H]2[C@@]1(CC[C@H]3[C@H]2[C@@H](C[C@H]4[C@@]3(CC[C@H](C4)O)C)O)C	0.997493	0.995001
nonadecanoate (19:0)	ISYWECDDZWTKFF-UHFFFAOYSA-N	12591	CCCCCCCCCCCCCCCCCCC(=O)O	0.997821	1.00991
dehydroisoandrosterone sulfate (DHEA-S)	CZWCKYRVOZZJNM-USOAJAOKSA-N	12594	C[C@]12CC[C@H]3[C@H]([C@@H]1CCC2=O)CC=C4[C@@]3(CC[C@@H](C4)OS(=O)(=O)O)C	0.409408	0.924426
2-piperidinone	XUWHAWMETYGRKB-UHFFFAOYSA-N	12665	C1CCNC(=O)C1	0.640498	0.967357
dodecanedioate	TVIDDXQYHWJXFK-UHFFFAOYSA-N	12736	C(CCCCCC(=O)O)CCCCC(=O)O	0.746559	0.877267
2'-deoxyuridine	MXHRCPNRJAMMIM-SHYZEUOFSA-N	13712	C1[C@@H]([C@H](O[C@H]1N2C=CC(=O)NC2=O)CO)O	0.882543	1.01758
pentadecanoate (15:0)	WQEPLUUGTLDZJY-UHFFFAOYSA-N	13849	CCCCCCCCCCCCCCC(=O)O	0.619589	1.02725
10-undecenoate (11:1n1)	FRPZMMHWLSIFAZ-UHFFFAOYSA-M	14891	C=CCCCCCCCCC(=O)[O-]	0.447711	1.01442
1-palmitoylglycerol (16:0)	QHZLMUACJMDIAE-UHFFFAOYSA-N	14900	CCCCCCCCCCCCCCCC(=O)OCC(CO)O	0.0180686	1.18092
alpha-tocopherol	GVJHHUAWPYXKBD-IEOSBIPESA-N	14985	CC1=C(C(=C2CC[C@@](OC2=C1C)(C)CCC[C@H](C)CCC[C@H](C)CCCC(C)C)C)O	0.809355	1.00842
pseudouridine	PTJWIQPHWPFNBW-GBNDHIKLSA-N	15047	C1=C(C(=O)NC(=O)N1)[C@H]2[C@@H]([C@@H]([C@H](O2)CO)O)O	0.974253	0.99215
4-acetamidobutanoate	UZTFMUBKZQVKLK-UHFFFAOYSA-N	18189	CC(=O)NCCCC(=O)O	0.377589	0.954704
mannose	WQZGKKKJIJFFOK-QTVWNMPRSA-N	18950	C([C@@H]1[C@H]([C@@H]([C@@H](C(O1)O)O)O)O)O	0.241901	0.940539
2-hydroxydecanoate	GHPVDCPCKSNJDR-UHFFFAOYSA-N	21488	CCCCCCCCC(C(=O)O)O	0.129246	1.03585
O-methylcatechol sulfate	AQTYXAPIHMXAAV-UHFFFAOYSA-N	22473	COC1=CC=CC=C1OS(=O)(=O)O	0.254385	0.945502
N-acetylglucosamine/N-acetylgalactosamine	OVRNDRQMDRJTHS-FMDGEEDCSA-N	24139	CC(=O)N[C@@H]1[C@H]([C@@H]([C@H](O[C@H]1O)CO)O)O	0.328304	0.978712
S-methylcysteine	IDIDJDIHTAOVLG-VKHMYHEASA-N	24417	CSC[C@@H](C(=O)O)N	0.446311	0.937016
3-hydroxydecanoate	FYSSBMZUBSBFJL-UHFFFAOYSA-N	26612	CCCCCCCC(CC(=O)O)O	0.0425235	1.07888
3-hydroxyoctanoate	NDPLAKGOSZHTPH-UHFFFAOYSA-N	26613	CCCCCC(CC(=O)O)O	0.0989249	1.02356
phytanate	RLCKHJSFHOZMDR-UHFFFAOYSA-N	26840	CC(C)CCCC(C)CCCC(C)CCCC(C)CC(=O)O	0.879016	1.07226
N1-methyladenosine	GFYLSDSUCHVORB-IOSLPCCCSA-N	27476	CN1C=NC2=C(C1=N)N=CN2[C@H]3[C@@H]([C@@H]([C@H](O3)CO)O)O	0.313067	1.03763
stearoyl ethanolamide	OTGQIQQTPXJQRG-UHFFFAOYSA-N	27902	CCCCCCCCCCCCCCCCCC(=O)NCCO	0.000968174	1.26798
stearamide	LYRFLYHAGKPMFH-UHFFFAOYSA-N	31292	CCCCCCCCCCCCCCCCCC(=O)N	0.00208514	1.62993
ursodeoxycholate	RUDATBOHQWOJDD-UZVSRGJWSA-N	31401	C[C@H](CCC(=O)O)[C@H]1CC[C@@H]2[C@@]1(CC[C@H]3[C@H]2[C@H](C[C@H]4[C@@]3(CC[C@H](C4)O)C)O)C	0.114022	0.830518
4-hydroxychlorothalonil	MDQKYGOECVSPIW-UHFFFAOYSA-N	34217	C(#N)C1=C(C(=C(C(=C1Cl)C#N)Cl)Cl)O	0.513207	0.983115
13-HODE + 9-HODE	XBGUTAISSLTGIB-UHFFFAOYSA-N	43013	CC1C(=NOC(=O)NC)SCS1	0.967928	1.06097
adenosine	OIRDTQYFTABQOQ-KQYNXXCUSA-N	60961	C1=NC2=C(C(=N1)N)N=CN2[C@H]3[C@@H]([C@@H]([C@H](O3)CO)O)O	1.91396e-08	0.0189344
3-aminoisobutyrate	QCHPKSFMDHPSNR-UHFFFAOYSA-N	64956	CC(CN)C(=O)O	0.856637	0.989766
1,5-anhydroglucitol (1,5-AG)	MPCAJMNYNOGXPB-SLPGGIOYSA-N	64960	C1[C@@H]([C@H]([C@@H]([C@H](O1)CO)O)O)O	0.703539	0.978537
3-methylhistidine	JDHILDINMRGULE-LURJTMIESA-N	64969	CN1C=NC=C1C[C@@H](C(=O)O)N	0.814789	0.839801
N-acetylaspartate (NAA)	OTCCIMWXFLJLIA-BYPYZUCNSA-N	65065	CC(=O)N[C@@H](CC(=O)O)C(=O)O	0.232394	1.06851
homocitrulline	XIGSAGMEBXLVJJ-YFKPBYRVSA-N	65072	C(CCNC(=O)N)C[C@@H](C(=O)O)N	0.651689	0.912374
N1-methylinosine	WJNGQIYEQLPJMN-IOSLPCCCSA-N	65095	CN1C=NC2=C(C1=O)N=CN2[C@H]3[C@@H]([C@@H]([C@H](O3)CO)O)O	0.010276	1.10754
N-acetylserine	JJIHLJJYMXLCOY-BYPYZUCNSA-N	65249	CC(=O)N[C@@H](CO)C(=O)O	0.748616	1.01399
gamma-glutamyl-alpha-lysine	LNLLNTMHVMIMOG-YUMQZZPRSA-N	65254	C(CCN)C[C@@H](C(=O)O)NC(=O)CC[C@@H](C(=O)O)N	0.214787	1.06668
arabinose	PYMYPHUHKUWMLA-WDCZJNDASA-N	66308	C([C@H]([C@H]([C@@H](C=O)O)O)O)O	0.581262	0.671725
N-acetylvaline	IHYJTAOFMMMOPX-LURJTMIESA-N	66789	CC(C)[C@@H](C(=O)O)NC(=O)C	0.409593	0.924977
N-acetylarginine	SNEIUMQYRCDYCH-LURJTMIESA-N	67427	CC(=O)N[C@@H](CCCN=C(N)N)C(=O)O	0.65076	1.00485
cystine	LEVWYRKDKASIDU-IMJSIDKUSA-N	67678	C([C@@H](C(=O)O)N)SSC[C@@H](C(=O)O)N	0.114616	0.909424
N-acetyltyrosine	CAHKINHBCWCHCF-JTQLQIEISA-N	68310	CC(=O)N[C@@H](CC1=CC=C(C=C1)O)C(=O)O	0.706866	1.04469
7-methylxanthine	PFWLFWPASULGAN-UHFFFAOYSA-N	68374	CN1C=NC2=C1C(=O)NC(=O)N2	0.638896	0.976896
7-methylurate	YHNNPKUFPWLTOP-UHFFFAOYSA-N	69160	CN1C2=C(NC(=O)NC2=O)NC1=O	0.357358	0.783711
beta-hydroxyisovalerate	AXFYFNCPONWUHW-UHFFFAOYSA-N	69362	CC(C)(CC(=O)O)O	0.0252099	0.824406
2-hydroxystearate	KIHBGTRZFAVZRV-UHFFFAOYSA-N	69417	CCCCCCCCCCCCCCCCC(C(=O)O)O	0.865052	1.02088
palmitic amide	HSEMFIZWXHQJAE-UHFFFAOYSA-N	69421	CCCCCCCCCCCCCCCC(=O)N	0.0335931	1.34958
2-aminooctanoate	AKVBCGQVQXPRLD-UHFFFAOYSA-N	69522	CCCCCCC(C(=O)O)N	0.734876	1.01803
N1-Methyl-2-pyridone-5-carboxamide	JLQSXXWTCJPCBC-UHFFFAOYSA-N	69698	CN1C=C(C=CC1=O)C(=O)N	0.210773	0.930433
1-methylurate	QFDRTQONISXGJA-UHFFFAOYSA-N	69726	CN1C(=O)C2=C(NC(=O)N2)NC1=O	0.297045	0.8712
indole-3-carboxylic acid	KMAKOBLIOCQGJP-UHFFFAOYSA-N	69867	C1=CC=C2C(=C1)C(=CN2)C(=O)O	0.765568	1.01285
methionine sulfone	UCUNFLYVYCGDHP-UHFFFAOYSA-N	69961	CS(=O)(=O)CCC(C(=O)O)N	0.0291238	1.08536
octadecanedioate	BNJOQKFENDDGSC-UHFFFAOYSA-N	70095	C(CCCCCCCCC(=O)O)CCCCCCCC(=O)O	0.23853	0.974193
imidazole propionate	ZCKYOWGFRHAZIQ-UHFFFAOYSA-N	70630	C1=C(NC=N1)CCC(=O)O	0.507794	1.07333
3-methylxanthine	GMSNIKWWOQHZGF-UHFFFAOYSA-N	70639	CN1C2=C(C(=O)NC1=O)NC=N2	0.0273512	0.898808
N-acetylleucine	WXNXCEHXYPACJF-ZETCQYMHSA-N	70912	CC(C)C[C@@H](C(=O)O)NC(=O)C	0.584169	0.943654
N-acetylglutamate	RFMMMVDNIPUKGG-YFKPBYRVSA-N	70914	CC(=O)N[C@@H](CCC(=O)O)C(=O)O	0.0804844	1.07763
glycerophosphorylcholine (GPC)	SUHOQUVVVLNYQR-QMMMGPOBSA-N	71920	C[N+](C)(C)CCOP(=O)([O-])OC[C@H](CO)O	0.214444	1.53492
glycolithocholate sulfate*	FHXBAFXQVZOILS-OETIFKLTSA-N	72222	C[C@H](CCC(=O)NCC(=O)O)[C@H]1CC[C@@H]2[C@@]1(CC[C@H]3[C@H]2CC[C@H]4[C@@]3(CC[C@H](C4)OS(=O)(=O)O)C)C	0.847465	1.03279
3-sulfo-L-alanine	XVOYSCVBGLVSOL-REOHCLBHSA-N	72886	C([C@@H](C(=O)O)N)S(=O)(=O)O	0.00588248	1.59002
phenol sulfate	CTYRPMDGLDAWRQ-UHFFFAOYSA-N	74426	C1=CC=C(C=C1)OS(=O)(=O)O	0.870053	1.00196
perfluorooctanesulfonic acid (PFOS)	YFSUTJLHUFNCNZ-UHFFFAOYSA-N	74483	C(C(C(C(C(F)(F)S(=O)(=O)O)(F)F)(F)F)(F)F)(C(C(C(F)(F)F)(F)F)(F)F)(F)F	0.356197	0.992771
N-acetylphenylalanine	CBQJSKKFNMDLON-JTQLQIEISA-N	74839	CC(=O)N[C@@H](CC1=CC=CC=C1)C(=O)O	0.366435	0.924605
eicosanodioate	JJOJFIHJIRWASH-UHFFFAOYSA-N	75502	C(CCCCCCCCCC(=O)O)CCCCCCCCC(=O)O	0.941032	0.938959
N-acetylhistidine	KBOJOGQFRVVWBH-ZETCQYMHSA-N	75619	CC(=O)N[C@@H](CC1=CN=CN1)C(=O)O	0.762804	1.0267
1-methylimidazoleacetate	ZHCKPJGJQOPTLB-UHFFFAOYSA-N	75810	CN1C=C(N=C1)CC(=O)O	0.115148	1.03317
N-acetyl-beta-alanine	LJLLAWRMBZNPMO-UHFFFAOYSA-N	76406	CC(=O)NCCC(=O)O	0.11754	0.81049
glucose	WQZGKKKJIJFFOK-DVKNGEFBSA-N	79025	C([C@@H]1[C@H]([C@@H]([C@H]([C@H](O1)O)O)O)O)O	0.136205	0.966201
1-myristoylglycerol (14:0)	DCBSHORRWZKAKO-UHFFFAOYSA-N	79050	CCCCCCCCCCCCCC(=O)OCC(CO)O	0.0216439	1.16124
1-methylxanthine	MVOYJPOZRLFTCP-UHFFFAOYSA-N	80220	CN1C(=O)C2=C(NC1=O)N=CN2	0.770519	1.03251
S-methylcysteine sulfoxide	ZZLHPCSGGOGHFW-UHFFFAOYSA-N	82142	CS(=O)CC(C(=O)O)N	0.462096	1.0051
alpha-hydroxyisocaproate	LVRFTAZAXQPQHI-YFKPBYRVSA-N	83697	CC(C)C[C@@H](C(=O)O)O	0.8948	1.03548
1-palmitoyl-GPC (16:0)	ASWBNKHCZGQVJV-UHFFFAOYSA-N	86554	CCCCCCCCCCCCCCCC(=O)OCC(COP(=O)([O-])OCC[N+](C)(C)C)O	0.00150172	1.09192
N-acetylalanine	KTHDTJVBEPMMGL-VKHMYHEASA-N	88064	C[C@@H](C(=O)O)NC(=O)C	0.699397	0.967561
5-acetylamino-6-amino-3-methyluracil	POQOTWQIYYNXAT-UHFFFAOYSA-N	88299	CC(=O)NC1=C(NC(=O)N(C1=O)C)N	0.256773	1.16752
4-cholesten-3-one	NYOXRYYXRWJDKP-GYKMGIIDSA-N	91477	C[C@H](CCCC(C)C)[C@H]1CC[C@@H]2[C@@]1(CC[C@H]3[C@H]2CCC4=CC(=O)CC[C@]34C)C	0.923272	1.00856
1,7-dimethylurate	NOFNCLGCUJJPKU-UHFFFAOYSA-N	91611	CN1C2=C(NC1=O)NC(=O)N(C2=O)C	0.355459	0.927351
1-methylhistidine	BRMWTNUJHUMWMS-LURJTMIESA-N	92105	CN1C=C(N=C1)C[C@@H](C(=O)O)N	0.414419	0.940372
phenylacetylglutamine	JFLIEFSWGNOPJJ-JTQLQIEISA-N	92258	C1=CC=C(C=C1)CC(=O)N[C@@H](CCC(=O)N)C(=O)O	0.0841413	1.02652
orotidine	FKCRAVPPBFWEJD-XVFCMESISA-N	92751	C1=C(N(C(=O)NC1=O)[C@H]2[C@@H]([C@@H]([C@H](O2)CO)O)O)C(=O)O	0.204577	1.12583
hyocholate	DKPMWHFRUGMUKF-KWXDGCAGSA-N	92805	C[C@H](CCC(=O)O)[C@H]1CC[C@@H]2[C@@]1(CC[C@H]3[C@H]2[C@@H]([C@@H]([C@H]4[C@@]3(CC[C@H](C4)O)C)O)O)C	0.523318	0.918643
N6-acetyllysine	DTERQYGMUDWYAZ-ZETCQYMHSA-N	92832	CC(=O)NCCCC[C@@H](C(=O)O)N	0.316818	1.10249
2-hydroxypalmitate	JGHSBPIZNUXPLA-UHFFFAOYSA-N	92836	CCCCCCCCCCCCCCC(C(=O)O)O	0.704509	0.983068
gamma-glutamylglutamate	OWQDWQKWSLFFFR-WDSKDSINSA-N	92865	C(CC(=O)N[C@@H](CCC(=O)O)C(=O)O)[C@@H](C(=O)O)N	0.00227464	1.32426
indolelactate	XGILAAMKEQUXLS-UHFFFAOYSA-N	92904	C1=CC=C2C(=C1)C(=CN2)CC(C(=O)O)O	0.483221	0.989312
3b-hydroxy-5-cholenoic acid	HIAJCGFYHIANNA-QIZZZRFXSA-N	92997	C[C@H](CCC(=O)O)[C@H]1CC[C@@H]2[C@@]1(CC[C@H]3[C@H]2CC=C4[C@@]3(CC[C@@H](C4)O)C)C	0.138752	0.886557
N-carbamoylaspartate	HLKXYZVTANABHZ-REOHCLBHSA-N	93072	C([C@@H](C(=O)O)NC(=O)N)C(=O)O	9.15204e-06	1.5654
thioproline	DZLNHFMRPBPULJ-VKHMYHEASA-N	93176	C1[C@H](NCS1)C(=O)O	0.016764	1.08663
5,6-dihydrothymine	NBAKTGXDIBVZOO-UHFFFAOYSA-N	93556	CC1CNC(=O)NC1=O	0.853941	0.985356
2-hydroxyoctanoate	JKRDADVRIYVCCY-UHFFFAOYSA-N	94180	CCCCCCC(C(=O)O)O	0.0452255	1.13225
3-hydroxylaurate	MUCMKTPAZLSKTL-UHFFFAOYSA-N	94216	CCCCCCCCCC(CC(=O)O)O	0.641495	1.05826
gamma-glutamyltyrosine	VVLXCWVSSLFQDS-QWRGUYRKSA-N	94340	C1=CC(=CC=C1C[C@@H](C(=O)O)NC(=O)CC[C@@H](C(=O)O)N)O	0.807344	1.01017
5-bromotryptophan	KZDNJQUJBMDHJW-UHFFFAOYSA-N	96735	C1=CC2=C(C=C1Br)C(=CN2)CC(C(=O)O)N	0.339866	0.899557
glycylvaline	STKYPAFSDFAEPH-UHFFFAOYSA-N	97417	CC(C)C(C(=O)O)NC(=O)CN	9.70739e-09	13.2496
leucylglycine	VVHOUVWJCQOYGG-UHFFFAOYSA-N	97856	C(C(C(=O)O)N=C(N)N)C(=O)O	1.71707e-07	2.97342
lanthionine	DWPCPZJAHOETAG-IMJSIDKUSA-N	98504	C([C@@H](C(=O)O)N)SC[C@@H](C(=O)O)N	0.453839	1.06238
N-acetylasparagine	HXFOXFJUNFFYMO-BYPYZUCNSA-N	99715	CC(=O)N[C@@H](CC(=O)N)C(=O)O	0.221521	0.885891
alpha-hydroxyisovalerate	NGEWQZIDQIYUNV-UHFFFAOYSA-N	99823	CC(C)C(C(=O)O)O	0.976528	1.00444
N-formylanthranilic acid	LLLPDUXGHXIXIW-UHFFFAOYSA-N	101399	C1=CC=C(C(=C1)C(=O)O)NC=O	0.422104	0.944302
pregnenolone sulfate	DIJBBUIOWGGQOP-QGVNFLHTSA-N	105074	CC(=O)[C@H]1CC[C@@H]2[C@@]1(CC[C@H]3[C@H]2CC=C4[C@@]3(CC[C@@H](C4)OS(=O)(=O)O)C)C	0.300353	0.973675
N4-acetylcytidine	NIDVTARKFBZMOT-PEBGCTIMSA-N	107461	CC(=O)NC1=NC(=O)N(C=C1)[C@H]2[C@@H]([C@@H]([C@H](O2)CO)O)O	0.435117	1.08913
propionylcarnitine (C3)	UFAHZIUFPNSHSL-UHFFFAOYSA-N	107738	CCC(=O)OC(CC(=O)[O-])C[N+](C)(C)C	0.507821	0.956511
hypotaurine	VVIUBCNYACGLLV-UHFFFAOYSA-N	107812	C(CS(=O)O)N	7.2108e-06	1.47191
5-acetylamino-6-formylamino-3-methyluracil	RDZNZFGKEVDNPK-UHFFFAOYSA-N	108214	CC(=O)NC1=C(NC(=O)N(C1=O)C)NC=O	0.133244	1.11933
gamma-glutamylphenylalanine	XHHOHZPNYFQJKL-QWRGUYRKSA-N	111299	C1=CC=C(C=C1)C[C@@H](C(=O)O)NC(=O)CC[C@@H](C(=O)O)N	0.622455	0.945899
cysteine s-sulfate	NOKPBJYHPHHWAN-REOHCLBHSA-N	115015	C([C@@H](C(=O)O)N)SS(=O)(=O)O	0.0313134	1.28593
stachydrine	CMUNUTVVOOHQPW-LURJTMIESA-N	115244	C[N+]1(CCC[C@H]1C(=O)[O-])C	0.285157	1.0314
dopamine 3-O-sulfate	NZKRYJGNYPYXJZ-UHFFFAOYSA-N	122136	C1=CC(=C(C=C1CCN)OS(=O)(=O)O)O	0.934664	0.969239
pyrraline	VTYFITADLSVOAS-NSHDSACASA-N	122228	C1=C(N(C(=C1)C=O)CCCC[C@@H](C(=O)O)N)CO	0.397847	0.821241
N-acetylputrescine	KLZGKIDSEJWEDW-UHFFFAOYSA-N	122356	CC(=O)NCCCCN	0.562585	1.01774
octanoylcarnitine (C8)	CXTATJFJDMJMIY-UHFFFAOYSA-N	123701	CCCCCCCC(=O)OC(CC(=O)[O-])C[N+](C)(C)C	0.292045	1.02793
pregnanediol-3-glucuronide	ZFFFJLDTCLJDHL-JQYCEVDMSA-N	123796	C[C@@H]([C@H]1CC[C@@H]2[C@@]1(CC[C@H]3[C@H]2CC[C@H]4[C@@]3(CC[C@H](C4)O[C@H]5[C@@H]([C@H]([C@@H]([C@H](O5)C(=O)O)O)O)O)C)C)O	0.305747	0.953232
N6-carboxymethyllysine	NUXSIDPKKIEIMI-LURJTMIESA-N	123800	C(CCNCC(=O)O)C[C@@H](C(=O)O)N	0.993068	0.943725
N-acetylglucosaminylasparagine	YTTRPBWEMMPYSW-HRRFRDKFSA-N	123826	CC(=O)N[C@@H]1[C@H]([C@@H]([C@H](O[C@H]1NC(=O)C[C@@H](C(=O)O)N)CO)O)O	0.160614	1.21378
dimethylarginine (SDMA + ADMA)	YDGMGEXADBMOMJ-LURJTMIESA-N	123831	CN(C)C(=NCCC[C@@H](C(=O)O)N)N	0.599682	0.991609
glycerophosphoethanolamine	JZNWSCPGTDBMEW-UHFFFAOYSA-N	123874	C(COP(=O)(O)OCC(CO)O)N	0.226808	1.09819
pristanate	PAHGJZDQXIOYTH-UHFFFAOYSA-N	123929	CC(C)CCCC(C)CCCC(C)CCCC(C)C(=O)O	0.966671	1.05269
3-carboxy-4-methyl-5-propyl-2-furanpropanoate (CMPF)	WMCQWXZMVIETAO-UHFFFAOYSA-N	123979	CCCC1=C(C(=C(O1)CCC(=O)O)C(=O)O)C	0.262166	0.927896
ectoine	WQXNXVUDBPYKBA-YFKPBYRVSA-N	126041	CC1=NCC[C@H](N1)C(=O)O	0.693317	0.942403
isoursodeoxycholate	RUDATBOHQWOJDD-DNMBCGTGSA-N	127601	C[C@H](CCC(=O)O)[C@H]1CC[C@@H]2[C@@]1(CC[C@H]3[C@H]2[C@H](C[C@H]4[C@@]3(CC[C@@H](C4)O)C)O)C	0.935231	0.916972
3-methylglutarylcarnitine (2)	HFCPFJNSBPQJDP-UHFFFAOYSA-N	128145	CC(CC(=O)[O-])CC(=O)OC(CC(=O)O)C[N+](C)(C)C	0.266272	0.969389
acisoga	OAUYENAPBFTAQT-UHFFFAOYSA-N	129397	CC(=O)NCCCN1CCCC1=O	0.839846	0.989836
1-myristoyl-2-palmitoyl-GPC (14:0/16:0)	RFVFQQWKPSOBED-PSXMRANNSA-N	129657	CCCCCCCCCCCCCCCC(=O)O[C@H](COC(=O)CCCCCCCCCCCCC)COP(=O)([O-])OCC[N+](C)(C)C	0.937855	0.984667
gamma-CEHC	VMJQLPNCUPGMNQ-UHFFFAOYSA-N	133098	CC1=C(C=C2CCC(OC2=C1C)(C)CCC(=O)O)O	0.40953	0.82505
pyroglutamine*	NPWMTBZSRRLQNJ-UHFFFAOYSA-N	134508	C1CC(=O)NC(=O)C1N	0.898308	0.996963
21-hydroxypregnenolone disulfate	CBOVWLYQUCVTFA-WPWXJNKXSA-N	134595	C[C@]12CC[C@H]3[C@H]([C@@H]1CC[C@@H]2C(=O)COS(=O)(=O)O)CC=C4[C@@]3(CC[C@@H](C4)OS(=O)(=O)O)C	0.81636	1.01296
valylglycine	IOUPEELXVYPCPG-UHFFFAOYSA-N	136487	CC(C)C(C(=O)NCC(=O)O)N	0.00010297	1.74071
proline	ONIBWKKTOPOVIA-BYPYZUCNSA-N	145742	C1C[C@H](NC1)C(=O)O	0.000182955	1.03521
gamma-glutamylglutamine	JBFYFLXEJFQWMU-WDSKDSINSA-N	150914	C(CC(=O)N[C@@H](CCC(=O)N)C(=O)O)[C@@H](C(=O)O)N	8.21854e-07	1.2037
2'-O-methylcytidine	RFCQJGFZUQFYRF-ZOQUXTDFSA-N	150971	CO[C@@H]1[C@@H]([C@H](O[C@H]1N2C=CC(=NC2=O)N)CO)O	0.664909	1.00534
N-palmitoylglycine	KVTFEOAKFFQCCX-UHFFFAOYSA-N	151008	CCCCCCCCCCCCCCCC(=O)NCC(=O)O	0.0267171	0.882774
4-hydroxyhippurate	ZMHLUFWWWPBTIU-UHFFFAOYSA-N	151012	C1=CC(=CC=C1C(=O)NCC(=O)O)O	0.252453	0.883639
13-methylmyristate	ZOCYQVNGROEVLU-UHFFFAOYSA-N	151014	CC(C)CCCCCCCCCCCC(=O)O	0.406214	1.06768
gamma-glutamylleucine	MYFMARDICOWMQP-YUMQZZPRSA-N	151023	CC(C)C[C@@H](C(=O)O)NC(=O)CC[C@@H](C(=O)O)N	0.0294052	1.07434
threonate	JPIJQSOTBSSVTP-GBXIJSLDSA-N	151152	C([C@H]([C@@H](C(=O)O)O)O)O	0.391356	1.02067
3-hydroxyhexanoate	HPMGFDVTYHWBAG-UHFFFAOYSA-N	151492	CCCC(CC(=O)O)O	0.397003	0.933412
palmitoylcholine	ODYPFMHOOQOHEF-UHFFFAOYSA-N	151731	CCCCCCCCCCCCCCCC(=O)OCC[N+](C)(C)C	0.58513	1.02193
N-acetylthreonine	PEDXUVCGOLSNLQ-WUJLRWPWSA-N	152204	C[C@H]([C@@H](C(=O)O)NC(=O)C)O	0.668799	0.941558
17alpha-hydroxypregnenolone 3-sulfate	OMOKWYAQVYBHMG-QUPIPBJSSA-N	152971	CC(=O)[C@]1(CC[C@@H]2[C@@]1(CC[C@H]3[C@H]2CC=C4[C@@]3(CCC(C4)OS(=O)(=O)O)C)C)O	0.430984	1.00308
methionine sulfoxide	QEFRNWWLZKMPFJ-YGVKFDHGSA-N	158980	CS(=O)CC[C@@H](C(=O)O)N	0.000345567	1.23809
3-methylcytidine	RDPUKVRQKWBSPK-YYNOVJQHSA-N	159649	CN1C(=N)C=CN(C1=O)[C@@H]2[C@@H]([C@@H]([C@H](O2)CO)O)O	0.556082	0.979653
androsterone sulfate	ZMITXKRGXGRMKS-HLUDHZFRSA-N	159663	C[C@]12CC[C@H](C[C@@H]1CC[C@@H]3[C@@H]2CC[C@]4([C@H]3CCC4=O)C)OS(=O)(=O)O	0.295865	0.888904
N-acetyltaurine	CXJAAWRLVGAKDV-UHFFFAOYSA-N	159864	CC(=O)NCCS(=O)(=O)O	0.126154	1.17613
argininate*	BMFMQGXDDJALKQ-BYPYZUCNSA-N	160437	C(C[C@@H](C(=O)O)O)CN=C(N)N	0.880476	0.984009
kynurenine	YGPSJZOEDVAXAB-QMMMGPOBSA-N	161166	C1=CC=C(C(=C1)C(=O)C[C@@H](C(=O)O)N)N	0.863605	0.996822
2-keto-3-deoxy-gluconate	WPAMZTWLKIDIOP-WVZVXSGGSA-N	161227	C([C@@H]([C@@H](CO)O)O)C(=O)C(=O)O	0.223686	1.11621
N6-carbamoylthreonyladenosine	UNUYMBPXEFMLNW-DWVDDHQFSA-N	161466	C[C@H]([C@@H](C(=O)O)NC(=O)NC1=NC=NC2=C1N=CN2[C@H]3[C@@H]([C@@H]([C@H](O3)CO)O)O)O	0.276596	0.938168
2-hydroxy-3-methylvalerate	RILPIWOPNGRASR-UHFFFAOYSA-N	164623	CCC(C)C(C(=O)O)O	0.542513	0.928187
3beta-hydroxy-5-cholestenoate	WVXOMPRLWLXFAP-AMQKJUDNSA-N	165511	C[C@H](CCCC(C)C(=O)O)[C@H]1CC[C@@H]2[C@@]1(CC[C@H]3[C@H]2CC=C4[C@@]3(CC[C@@H](C4)O)C)C	0.86617	0.934024
gamma-glutamylglycine	ACIJGUBIMXQCMF-BYPYZUCNSA-N	165527	C(CC(=O)NCC(=O)O)[C@@H](C(=O)O)N	0.0163423	1.06321
glycerophosphoinositol*	BMVUIWJCUQSHLZ-LIPDPKNMSA-N	167572	C(C(COP(=O)(O)OC1[C@H]([C@H](C([C@H]([C@@H]1O)O)O)O)O)O)O	0.953694	1.02314
isobutyrylcarnitine (C4)	LRCNOZRCYBNMEP-SECBINFHSA-N	168379	CC(C)C(=O)O[C@H](CC(=O)[O-])C[N+](C)(C)C	0.493774	1.01219
2-aminophenol sulfate	VSTZVCJQGSLNLL-UHFFFAOYSA-N	181670	C1=CC=C(C(=C1)N)OS(=O)(=O)O	0.478072	0.918418
N-acetylglutamine	KSMRODHGGIIXDV-YFKPBYRVSA-N	182230	CC(=O)N[C@@H](CCC(=O)N)C(=O)O	0.838919	1.05222
3-hydroxy-2-ethylpropionate	ZMZQVAUJTDKQGE-UHFFFAOYSA-N	188979	CCC(CO)C(=O)O	0.0517857	1.05991
N-acetyl-1-methylhistidine*	FKTXRTPBUWLETL-QMMMGPOBSA-N	193270	CC(=O)N[C@@H](CC1=CN=CN1C)C(=O)O	0.848574	0.966174
2-hydroxyadipate	OTTXIFWBPRRYOG-UHFFFAOYSA-N	193530	C(CC(C(=O)O)O)CC(=O)O	0.082269	0.715837
2-methylbutyrylglycine	HOACIBQKYRHBOW-UHFFFAOYSA-N	193872	CCC(C)C(=O)NCC(=O)O	0.263682	0.826959
cholate	BHQCQFFYRZLCQQ-OELDTZBJSA-N	221493	C[C@H](CCC(=O)O)[C@H]1CC[C@@H]2[C@@]1([C@H](C[C@H]3[C@H]2[C@@H](C[C@H]4[C@@]3(CC[C@H](C4)O)C)O)O)C	0.970815	0.879938
erythritol	UNXHWFMMPAWVPI-ZXZARUISSA-N	222285	C([C@H]([C@H](CO)O)O)O	0.0748684	1.06432
deoxycholate	KXGVEGMKQFWNSR-LLQZFEROSA-N	222528	C[C@H](CCC(=O)O)[C@H]1CC[C@@H]2[C@@]1([C@H](C[C@H]3[C@H]2CC[C@H]4[C@@]3(CC[C@H](C4)O)C)O)C	0.793173	0.950209
cortisone	MFYSYFVPBJMHGN-ZPOLXVRWSA-N	222786	C[C@]12CCC(=O)C=C1CC[C@@H]3[C@@H]2C(=O)C[C@]4([C@H]3CC[C@@]4(C(=O)CO)O)C	0.55105	0.971146
2-aminoheptanoate	RDFMDVXONNIGBC-UHFFFAOYSA-N	227939	CCCCCC(C(=O)O)N	0.935535	0.994408
5alpha-androstan-3beta,17beta-diol disulfate	CBMYJHIOYJEBSB-YSZCXEEOSA-N	242332	C[C@]12CC[C@@H](C[C@@H]1CC[C@@H]3[C@@H]2CC[C@]4([C@H]3CC[C@@H]4O)C)O	0.262806	0.891969
docosadioate	DGXRZJSPDXZJFG-UHFFFAOYSA-N	244872	C(CCCCCCCCCCC(=O)O)CCCCCCCCCC(=O)O	0.837166	0.93665
leucylalanine	HSQGMTRYSIHDAC-UHFFFAOYSA-N	259321	CC(C)CC(C(=O)NC(C)C(=O)O)N	6.59405e-10	5.10481
etiocholanolone glucuronide	VFUIRAVTUVCQTF-UHFFFAOYSA-N	270605	CC12CCC(CC1CCC3C2CCC4(C3CCC4=O)C)OC5C(C(C(C(O5)C(=O)O)O)O)O	0.389381	0.954528
N-acetylproline	GNMSLDIYJOSUSW-UHFFFAOYSA-N	322640	CC(=O)N1CCCC1C(=O)O	0.100389	1.10768
cys-gly, oxidized	KDJVKDYFFTWHBO-UHFFFAOYSA-N	333293	C(C(C(=O)NCC(=O)O)N)SSCC(C(=O)NCC(=O)O)N	0.321805	1.09615
isoleucylglycine	UCGDDTHMMVWVMV-UHFFFAOYSA-N	342532	CCC(C)C(C(=O)NCC(=O)O)N	0.000330888	2.35962
taurochenodeoxycholate	BHTRKEVKTKCXOH-BJLOMENOSA-N	387316	C[C@H](CCC(=O)NCCS(=O)(=O)O)[C@H]1CC[C@@H]2[C@@]1(CC[C@H]3[C@H]2[C@@H](C[C@H]4[C@@]3(CC[C@H](C4)O)C)O)C	0.180487	1.01327
5-methylthioadenosine (MTA)	WUUGFSXJNOTRMR-IOSLPCCCSA-N	439176	CSC[C@@H]1[C@H]([C@H]([C@@H](O1)N2C=NC3=C2N=CN=C3N)O)O	0.613326	0.95561
N-acetylneuraminate	SQVRNKJHWKZAKO-LUWBGTNYSA-N	439197	CC(=O)N[C@@H]1[C@H](CC(O[C@H]1[C@@H]([C@@H](CO)O)O)(C(=O)O)O)O	0.0263992	1.24798
cysteinylglycine	ZUKPVRWZDMRIEO-VKHMYHEASA-N	439498	C([C@@H](C(=O)NCC(=O)O)N)S	0.442095	1.05203
2-aminobutyrate	QWCKQJZIFLGMSD-GSVOUGTGSA-N	439691	CC[C@H](C(=O)O)N	0.983956	0.993919
N-formylmethionine	PYUSHNKNPOHWEZ-YFKPBYRVSA-N	439750	CSCC[C@@H](C(=O)O)NC=O	0.266219	0.946841
butyrylcarnitine (C4)	QWYFHHGCZUCMBN-UHFFFAOYSA-N	439829	CCCC(=O)OC(CC(=O)[O-])C[N+](C)(C)C	0.803207	1.00546
taurolithocholate 3-sulfate	HSNPMXROZIQAQD-GBURMNQMSA-N	440071	C[C@H](CCC(=O)NCCS(=O)(=O)O)[C@H]1CC[C@@H]2[C@@]1(CC[C@H]3[C@H]2CC[C@H]4[C@@]3(CC[C@H](C4)OS(=O)(=O)O)C)C	0.365568	1.04145
gamma-glutamylalanine	WQXXXVRAFAKQJM-WHFBIAKZSA-N	440103	C[C@@H](C(=O)O)NC(=O)CC[C@@H](C(=O)O)N	0.538556	1.10698
N6,N6,N6-trimethyllysine	MXNRLFUSFKVQSK-QMMMGPOBSA-N	440120	C[N+](C)(C)CCCC[C@@H](C(=O)[O-])N	0.0712518	1.04545
imidazole lactate	ACZFBYCNAVEFLC-YFKPBYRVSA-N	440129	C1=C(NC=N1)C[C@@H](C(=O)O)O	0.307697	1.01918
N1-Methyl-4-pyridone-3-carboxamide	KTLRWTOPTKGYQY-UHFFFAOYSA-N	440810	CN1C=CC(=O)C(=C1)C(=O)N	0.364136	1.05873
homostachydrine*	XULZWQRXYTVUTE-ZETCQYMHSA-N	441447	C[N+]1(CCCC[C@H]1C(=O)[O-])C	0.487336	0.985167
tryptophan betaine	AOHCBEAZXHZMOR-ZDUSSCGKSA-N	442106	C[N+](C)(C)[C@@H](CC1=CNC2=CC=CC=C21)C(=O)[O-]	0.710931	0.977034
maleate	VZCYOOQTPOCHFL-UPHRSURJSA-N	444266	C(=C\C(=O)O)\C(=O)O	0.879615	1.02984
glucuronate	AEMOLEFTQBMNLQ-WAXACMCWSA-N	444791	[C@@H]1([C@@H]([C@H](O[C@@H]([C@@H]1O)O)C(=O)O)O)O	0.468605	1.05987
arachidonate (20:4n6)	YZXBAPSDXZZRGB-DOFZRALJSA-N	444899	CCCCC/C=C\C/C=C\C/C=C\C/C=C\CCCC(=O)O	0.276343	1.15791
fumarate	VZCYOOQTPOCHFL-OWOJBTEDSA-N	444972	C(=C/C(=O)O)\C(=O)O	5.533e-05	1.23076
retinol (Vitamin A)	FPIPGXGPPPQFEQ-OVSJKPMPSA-N	445354	CC1=C(C(CCC1)(C)C)/C=C/C(=C/C=C/C(=C/CO)/C)/C	0.0517167	1.04043
5-methyluridine (ribothymidine)	DWRXFEITVBNRMK-JXOAFFINSA-N	445408	CC1=CN(C(=O)NC1=O)[C@H]2[C@@H]([C@@H]([C@H](O2)CO)O)O	0.314394	0.875613
docosahexaenoate (DHA; 22:6n3)	MBMBGCFOFBJSGT-KUBAVDMBSA-N	445580	CC/C=C\C/C=C\C/C=C\C/C=C\C/C=C\C/C=C\CCC(=O)O	0.623245	1.04434
palmitoleate (16:1n7)	SECPZKHBENQXJG-FPLPWBNLSA-N	445638	CCCCCC/C=C\CCCCCCCC(=O)O	0.722741	0.993175
eicosapentaenoate (EPA; 20:5n3)	JAZBEHYOTPTENJ-JLNKQSITSA-N	446284	CC/C=C\C/C=C\C/C=C\C/C=C\C/C=C\CCCC(=O)O	0.647395	1.10093
N-acetylmethionine	XUYPXLNMDZIRQH-LURJTMIESA-N	448580	CC(=O)N[C@@H](CCSC)C(=O)O	0.668059	1.06703
3-hydroxyhippurate	XDOFWFNMYJRHEW-UHFFFAOYSA-N	450268	C1=CC(=CC(=C1)O)C(=O)NCC(=O)O	0.673964	0.923291
1,2-dipalmitoyl-GPC (16:0/16:0)	KILNVBDSWZSGLL-KXQOOQHDSA-N	452110	CCCCCCCCCCCCCCCC(=O)OC[C@H](COP(=O)([O-])OCC[N+](C)(C)C)OC(=O)CCCCCCCCCCCCCCC	0.606201	0.986104
1-stearoyl-GPC (18:0)	IHNKQIMGVNPMTC-RUZDIDTESA-N	497299	CCCCCCCCCCCCCCCCCC(=O)OC[C@H](COP(=O)([O-])OCC[N+](C)(C)C)O	0.0266812	1.07859
O-sulfo-L-tyrosine	CIQHWLTYGMYQQR-QMMMGPOBSA-N	514186	C1=CC(=CC=C1C[C@@H](C(=O)O)N)OS(=O)(=O)O	0.598134	0.949392
isovalerylglycine	ZRQXMKMBBMNNQC-UHFFFAOYSA-N	546304	CC(C)CC(=O)NCC(=O)O	0.712282	0.935062
piperine	MXXWOMGUGJBKIW-YPCIICBESA-N	638024	C1CCN(CC1)C(=O)/C=C/C=C/C2=CC3=C(C=C2)OCO3	0.112055	1.01545
N-acetyltryptophan	DZTHIGRZJZPRDV-LBPRGKRZSA-N	700653	CC(=O)N[C@@H](CC1=CNC2=CC=CC=C21)C(=O)O	0.369243	0.885269
cinnamoylglycine	YAADMLWHGMUGQL-VOTSOKGWSA-N	709625	C1=CC=C(C=C1)/C=C/C(=O)NCC(=O)O	0.0914483	0.898058
trans-urocanate	LOIYMIARKYCTBW-OWOJBTEDSA-N	736715	C1=C(NC=N1)/C=C/C(=O)O	0.99362	0.966599
3-methylglutaconate	WKRBKYFIJPGYQC-DUXPYHPUSA-N	1551553	C/C(=C\C(=O)O)/CC(=O)O	0.264165	1.02509
taurodeoxycholate	AWDRATDZQPNJFN-VAYUFCLWSA-N	2733768	C[C@H](CCC(=O)NCCS(=O)(=O)O)[C@H]1CC[C@@H]2[C@@]1([C@H](C[C@H]3[C@H]2CC[C@H]4[C@@]3(CC[C@H](C4)O)C)O)C	0.727357	0.942626
erythronate*	JPIJQSOTBSSVTP-PWNYCUMCSA-N	2781043	C([C@H]([C@H](C(=O)O)O)O)O	0.027121	1.08331
ergothioneine	SSISHJJTAXXQAX-UHFFFAOYSA-N	3032311	C[N+](C)(C)C(CC1=CNC(=S)N1)C(=O)[O-]	0.364462	0.978906
glycodeoxycholate	WVULKSPCQVQLCU-BUXLTGKBSA-N	3035026	C[C@H](CCC(=O)NCC(=O)O)[C@H]1CC[C@@H]2[C@@]1([C@H](C[C@H]3[C@H]2CC[C@H]4[C@@]3(CC[C@H](C4)O)C)O)C	0.557718	0.93375
3beta,7alpha-dihydroxy-5-cholestenoate	GYJSAWZGYQXRBS-GRJZKGIBSA-N	3081084	C[C@H](CCCC(C)C(=O)O)[C@H]1CC[C@@H]2[C@@]1(CC[C@H]3[C@H]2[C@@H](C=C4[C@@]3(CC[C@@H](C4)O)C)O)C	0.426385	0.954928
7-alpha-hydroxy-3-oxo-4-cholestenoate (7-Hoca)	SATGKQGFUDXGAX-MYWFJNCASA-N	3081085	C[C@H](CCCC(C)C(=O)O)[C@H]1CC[C@@H]2[C@@]1(CC[C@H]3[C@H]2[C@@H](CC4=CC(=O)CC[C@]34C)O)C	0.34703	0.945846
glycerophosphoserine*	ZWZWYGMENQVNFU-AKGZTFGVSA-N	3081457	C([C@@H](C(=O)O)N)OP(=O)(O)OCC(CO)O	0.0194371	1.78778
17-methylstearate	YETXGSGCWODRAA-UHFFFAOYSA-N	3083779	CC(C)CCCCCCCCCCCCCCCC(=O)O	0.87471	1.01936
catechol sulfate	MZPWKJZDOCIALD-UHFFFAOYSA-N	3083879	C1=CC=C(C(=C1)O)OS(=O)(=O)O	0.306201	0.871461
gamma-glutamyltryptophan	CATMPQFFVNKDEY-UHFFFAOYSA-N	3989307	C1=CC=C2C(=C1)C(=CN2)CC(C(=O)O)NC(=O)CCC(C(=O)O)N	0.0254626	0.929546
threonylphenylalanine	IQHUITKNHOKGFC-UHFFFAOYSA-N	4099799	CC(C(C(=O)NC(CC1=CC=CC=C1)C(=O)O)N)O	0.00162331	1.95398
cysteine-glutathione disulfide	BNRXZEPOHPEEAS-UHFFFAOYSA-N	4247235	C(CC(=O)NC(CSSCC(C(=O)O)N)C(=O)NCC(=O)O)C(C(=O)O)N	0.158083	1.11195
p-cresol sulfate	WGNAKZGUSRVWRH-UHFFFAOYSA-N	4615423	CC1=CC=C(C=C1)OS(=O)(=O)O	0.430019	0.970811
bilirubin (Z,Z)	BPYKTIZUTYGOLE-IFADSCNNSA-N	5280352	CC1=C(NC(=C1CCC(=O)O)CC2=C(C(=C(N2)/C=C\3/C(=C(C(=O)N3)C)C=C)C)CCC(=O)O)/C=C\4/C(=C(C(=O)N4)C=C)C	0.27961	1.03097
linoleate (18:2n6)	OYHQOLUKZRVURQ-HZJYTTRNSA-N	5280450	CCCCC/C=C\C/C=C\CCCCCCCC(=O)O	0.441778	1.02548
dihomo-linolenate (20:3n3 or n6)	HOBAELRKJCKHQD-QNEBEIHSSA-N	5280581	CCCCC/C=C\C/C=C\C/C=C\CCCCCCC(=O)O	0.439815	1.08572
15-HETE	JSFATNQSLKRBCI-VAEKSGALSA-N	5280724	CCCCC[C@@H](/C=C/C=C\C/C=C\C/C=C\CCCC(=O)O)O	0.00378488	1.75403
linolenate [alpha or gamma; (18:3n3 or 6)]	DTOSIQBPPRVQHS-PDBXOOCHSA-N	5280934	CC/C=C\C/C=C\C/C=C\CCCCCCCC(=O)O	0.664595	0.949761
erucate (22:1n9)	DPUOLQHDNGRHBS-KTKRTIGZSA-N	5281116	CCCCCCCC/C=C\CCCCCCCCCCCC(=O)O	0.890117	0.980441
myristoleate (14:1n5)	YWWVWXASSLXJHU-WAYWQWQTSA-N	5281119	CCCC/C=C\CCCCCCCC(=O)O	0.247424	1.08046
nervonate (24:1n9)*	GWHCXVQVJPWHRF-KTKRTIGZSA-N	5281120	CCCCCCCC/C=C\CCCCCCCCCCCCCC(=O)O	0.909191	0.95788
arachidonoyl ethanolamide	LGEQQWMQCRIYKG-DOFZRALJSA-N	5281969	CCCCC/C=C\C/C=C\C/C=C\C/C=C\CCCC(=O)NCCO	5.36965e-05	1.57227
2-arachidonoylglycerol (20:4)	RCRCTBLIHCHWDZ-DOFZRALJSA-N	5282280	CCCCC/C=C\C/C=C\C/C=C\C/C=C\CCCC(=O)OC(CO)CO	0.00995326	1.38945
1-arachidonylglycerol (20:4)	DCPCOKIYJYGMDN-DOFZRALJSA-N	5282281	CCCCC/C=C\C/C=C\C/C=C\C/C=C\CCCC(=O)OCC(CO)O	1.18711e-05	1.59778
eicosenoate (20:1)	BITHHVVYSMSWAG-KTKRTIGZSA-N	5282768	CCCCCCCC/C=C\CCCCCCCCCC(=O)O	0.400699	1.15441
docosadienoate (22:2n6)	HVGRZDASOHMCSK-AVQMFFATSA-N	5282807	CCCCC/C=C/C/C=C/CCCCCCCCCCCC(=O)O	0.805962	0.994809
12-HHTrE	KUKJHGXXZWHSBG-WBGSEQOASA-N	5283141	CCCCC[C@@H](/C=C/C=C/C/C=C\CCCC(=O)O)O	2.5138e-05	1.75223
oleamide	FATBGEAMYMYZAF-KTKRTIGZSA-N	5283387	CCCCCCCC/C=C\CCCCCCCC(=O)N	0.0420353	1.30039
linoleoyl ethanolamide	KQXDGUVSAAQARU-HZJYTTRNSA-N	5283446	CCCCC/C=C\C/C=C\CCCCCCCC(=O)NCCO	0.00235784	1.378
oleoyl ethanolamide	BOWVQLFMWHZBEF-KTKRTIGZSA-N	5283454	CCCCCCCC/C=C\CCCCCCCC(=O)NCCO	0.0395948	1.15512
1-oleoylglycerol (18:1)	RZRNAYUHWVFMIP-KTKRTIGZSA-N	5283468	CCCCCCCC/C=C\CCCCCCCC(=O)OCC(CO)O	0.0817822	1.17419
1-linoleoylglycerol (18:2)	WECGLUPZRHILCT-HZJYTTRNSA-N	5283469	CCCCC/C=C\C/C=C\CCCCCCCC(=O)OCC(CO)O	0.204467	1.11083
1-palmitoyl-2-oleoyl-GPE (16:0/18:1)	FHQVHHIBKUMWTI-OTMQOFQLSA-N	5283496	CCCCCCCCCCCCCCCC(=O)OC[C@H](COP(=O)(O)OCCN)OC(=O)CCCCCCC/C=C\CCCCCCCC	0.921666	0.963719
sphingosine 1-phosphate	DUYSYHSSBDVJSM-KRWOKUGFSA-N	5283560	CCCCCCCCCCCCC/C=C/[C@H]([C@H](COP(=O)(O)O)N)O	0.00243076	1.41923
N-palmitoyl-sphingosine (d18:1/16:0)	YDNKGFDKKRUKPY-TURZORIXSA-N	5283564	CCCCCCCCCCCCCCCC(=O)N[C@@H](CO)[C@@H](/C=C/CCCCCCCCCCCCC)O	0.480049	1.042
N-stearoyl-sphingosine (d18:1/18:0)*	VODZWWMEJITOND-NXCSZAMKSA-N	5283565	CCCCCCCCCCCCCCCCCC(=O)N[C@@H](CO)[C@@H](/C=C/CCCCCCCCCCCCC)O	0.36111	1.01384
N-palmitoyl-sphinganine (d18:0/16:0)	GCGTXOVNNFGTPQ-JHOUSYSJSA-N	5283572	CCCCCCCCCCCCCCC[C@H]([C@H](CO)NC(=O)CCCCCCCCCCCCCCC)O	0.372054	1.02494
N-stearoyl-sphinganine (d18:0/18:0)*	KZTJQXAANJHSCE-OIDHKYIRSA-N	5283573	CCCCCCCCCCCCCCCCCC(=O)N[C@@H](CO)[C@@H](CCCCCCCCCCCCCCC)O	0.551097	0.960238
1-palmitoyl-2-linoleoyl-GPC (16:0/18:2)	JLPULHDHAOZNQI-ZTIMHPMXSA-N	5287971	CCCCCCCCCCCCCCCC(=O)OC[C@H](COP(=O)([O-])OCC[N+](C)(C)C)OC(=O)CCCCCCC/C=C\C/C=C\CCCCC	0.632892	1.01774
1,2-dilinoleoyl-GPC (18:2/18:2)	FVXDQWZBHIXIEJ-LNDKUQBDSA-N	5288075	CCCCC/C=C\C/C=C\CCCCCCCC(=O)OC[C@H](COP(=O)([O-])OCC[N+](C)(C)C)OC(=O)CCCCCCC/C=C\C/C=C\CCCCC	0.599052	1.00881
1-stearoyl-2-arachidonoyl-GPE (18:0/20:4)	ANRKEHNWXKCXDB-BHFWLYLHSA-N	5289133	CCCCCCCCCCCCCCCCCC(=O)OC[C@H](COP(=O)(O)OCCN)OC(=O)CCC/C=C\C/C=C\C/C=C\C/C=C\CCCCC	0.639818	1.00789
5-dodecenoate (12:1n7)	IJBFSOLHRKELLR-FPLPWBNLSA-N	5312378	CCCCCC/C=C\CCCC(=O)O	0.256736	1.04964
10-heptadecenoate (17:1n7)	GDTXICBNEOEPAZ-FPLPWBNLSA-N	5312435	CCCCCC/C=C\CCCCCCCCC(=O)O	0.926396	0.953777
stearidonate (18:4n3)	JIWBIWFOSCKQMA-LTKCOYKYSA-N	5312508	CC/C=C\C/C=C\C/C=C\C/C=C\CCCCC(=O)O	0.681794	1.02384
10-nonadecenoate (19:1n9)	BBOWBNGUEWHNQZ-KTKRTIGZSA-N	5312513	CCCCCCCC/C=C\CCCCCCCCC(=O)O	0.246618	1.10147
mead acid (20:3n9)	UNSRRHDPHVZAHH-YOILPLPUSA-N	5312531	CCCCCCCC/C=C\C/C=C\C/C=C\CCCC(=O)O	0.154428	1.14021
2-hydroxynervonate*	UFOOFOUFKSIFCD-KTKRTIGZSA-N	5312783	CCCCCCCC/C=C\CCCCCCCCCCCCC(C(=O)O)O	0.471094	0.945026
12-HETE	ZNHVWPKMFKADKW-FYMOKONMSA-N	5312983	CCCCC/C=C\CC(/C=C\C=C/C/C=C/CCCC(=O)O)O	1.04108e-06	2.88065
bilirubin (E,E)*	BPYKTIZUTYGOLE-BMNRKXRESA-N	5315454	CC1=C(NC(=C1CCC(=O)O)CC2=C(C(=C(N2)/C=C/3\C(=C(C(=O)N3)C)C=C)C)CCC(=O)O)/C=C/4\C(=C(C(=O)N4)C=C)C	0.340055	1.11884
2-oleoylglycerol (18:1)	UPWGQKDVAURUGE-KTKRTIGZSA-N	5319879	CCCCCCCC/C=C\CCCCCCCC(=O)OC(CO)CO	0.909246	1.08401
biliverdin	RCNSAJSGRJSBKK-YKSNQIBWSA-N	5353439	CC\1=C(/C(=C/C2=C(C(=C(N2)/C=C\3/C(=C(C(=O)N3)C)C=C)C)CCC(=O)O)/N/C1=C/C4=NC(=O)C(=C4C)C=C)CCC(=O)O	0.47187	1.00579
sphingosine	WWUZIQQURGPMPG-CCEZHUSRSA-N	5353955	CCCCCCCCCCCCC/C=C/C(C(CO)N)O	8.82357e-06	1.47619
2-linoleoylglycerol (18:2)	IEPGNWMPIFDNSD-HZJYTTRNSA-N	5365676	CCCCC/C=C\C/C=C\CCCCCCCC(=O)OC(CO)CO	0.893123	1.1463
ribonate	QXKAIJAYHKCRRA-BXXZVTAOSA-N	5460677	C([C@H]([C@H]([C@H](C(=O)O)O)O)O)O	0.498306	0.869093
adrenate (22:4n6)	TWSWSIQAPQLDBP-DOFZRALJSA-N	5497181	CCCCC/C=C\C/C=C\C/C=C\C/C=C\CCCCCC(=O)O	0.402607	0.932347
bilirubin (E,Z or Z,E)*	BPYKTIZUTYGOLE-VVCLLGATSA-N	5799469	CC1=C(NC(=C1CCC(=O)O)CC2=C(C(=C(N2)/C=C/3\C(=C(C(=O)N3)C)C=C)C)CCC(=O)O)/C=C\4/C(=C(C(=O)N4)C=C)C	0.137893	1.06303
beta-cryptoxanthin	DMASLKHVQRHNES-QQGJMDNJSA-N	6384256	CC1=C(C(CCC1)(C)C)/C=C/C(=C/C=C/C(=C/C=C/C=C(\C)/C=C/C=C(\C)/C=C/C2=C(CC(CC2(C)C)O)C)/C)/C	0.94899	1.01855
1-palmitoyl-GPA (16:0)	YNDYKPRNFWPPFU-GOSISDBHSA-N	6419701	CCCCCCCCCCCCCCCC(=O)OC[C@H](COP(=O)(O)O)O	0.165351	1.27182
4-vinylphenol sulfate	IETVQHUKTKKBFF-UHFFFAOYSA-N	6426766	C=CC1=CC=C(C=C1)OS(=O)(=O)O	0.879019	1.02596
isovalerylcarnitine (C5)	IGQBPDJNUXPEMT-UHFFFAOYSA-N	6426851	CC(C)CC(=O)OC(CC(=O)[O-])C[N+](C)(C)C	0.198637	1.0348
hexanoylcarnitine (C6)	VVPRQWTYSNDTEA-UHFFFAOYSA-N	6426853	CCCCCC(=O)OC(CC(=O)[O-])C[N+](C)(C)C	0.0341966	0.937837
myristoylcarnitine (C14)	PSHXNVGSVNEJBD-UHFFFAOYSA-N	6426854	CCCCCCCCCCCCCC(=O)OC(CC(=O)[O-])C[N+](C)(C)C	0.00448021	1.07932
stearoylcarnitine (C18)	FNPHNLNTJNMAEE-UHFFFAOYSA-N	6426855	CCCCCCCCCCCCCCCCCC(=O)OC(CC(=O)[O-])C[N+](C)(C)C	0.0214023	1.08071
2-methylbutyrylcarnitine (C5)	IHCPDBBYTYJYIL-UHFFFAOYSA-N	6426901	CCC(C)C(=O)OC(CC(=O)[O-])C[N+](C)(C)C	0.625654	0.987115
linoleamide (18:2n6)	SFIHQZFZMWZOJV-HZJYTTRNSA-N	6435901	CCCCC/C=C\C/C=C\CCCCCCCC(=O)N	0.090146	1.25344
1-palmitoyl-2-oleoyl-GPC (16:0/18:1)	WTJKGGKOPKCXLL-MRCUWXFGSA-N	6436017	CCCCCCCCCCCCCCCC(=O)OCC(COP(=O)([O-])OCC[N+](C)(C)C)OC(=O)CCCCCCC/C=C\CCCCCCCC	0.695559	0.991125
dihomo-linoleate (20:2n6)	XSXIVVZCUAHUJO-HZJYTTRNSA-N	6439848	CCCCC/C=C\C/C=C\CCCCCCCCCC(=O)O	0.378176	1.06014
oleoylcarnitine (C18:1)	IPOLTUVFXFHAHI-SEYXRHQNSA-N	6441392	CCCCCCCC/C=C\CCCCCCCC(=O)OC(CC(=O)[O-])C[N+](C)(C)C	2.22883e-06	1.23824
docosapentaenoate (n6 DPA; 22:5n6)	AVKOENOBFIYBSA-WMPRHZDHSA-N	6441454	CCCCC/C=C\C/C=C\C/C=C\C/C=C\C/C=C\CCC(=O)O	0.525319	1.0125
1-palmitoyl-2-docosahexaenoyl-GPC (16:0/22:6)	IESVDEZGAHUQJU-ZLBXKVHBSA-N	6441886	CCCCCCCCCCCCCCCC(=O)OC[C@H](COP(=O)([O-])OCC[N+](C)(C)C)OC(=O)CC/C=C\C/C=C\C/C=C\C/C=C\C/C=C\C/C=C\CC	0.207391	0.976875
sphingomyelin (d18:1/18:1, d18:2/18:0)	NBEADXWAAWCCDG-QDDWGVBQSA-N	6443882	CCCCCCCCCCCCC/C=C/[C@H]([C@H](COP(=O)([O-])OCC[N+](C)(C)C)NC(=O)CCCCCCC/C=C\CCCCCCCC)O	0.365375	1.01271
sphingadienine	KWDXKYNWAKMLKK-YQMRQDNGSA-N	6449795	CCC/C=C\CCCCCCCC/C=C/C(C(CO)N)O	0.000321018	1.55916
linoleoylcarnitine (C18:2)*	MJLXQSQYKZWZCB-DQFWFXSYSA-N	6450015	CCCCC/C=C\C/C=C\CCCCCCCC(=O)O[C@H](CC(=O)[O-])C[N+](C)(C)C	8.84963e-05	1.28494
stearoyl sphingomyelin (d18:1/18:0)	LKQLRGMMMAHREN-YJFXYUILSA-N	6453725	CCCCCCCCCCCCCCCCCC(=O)N[C@@H](COP(=O)([O-])OCC[N+](C)(C)C)[C@@H](/C=C/CCCCCCCCCCCCC)O	0.7107	1.0052
gamma-glutamylmethionine	RQNSKRXMANOPQY-BQBZGAKWSA-N	7009567	CSCC[C@@H](C(=O)O)NC(=O)CC[C@@H](C(=O)O)N	0.0342566	1.12319
gamma-glutamylvaline	AQAKHZVPOOGUCK-XPUUQOCRSA-N	7015683	CC(C)[C@@H](C(=O)O)NC(=O)CC[C@@H](C(=O)O)N	0.0450679	1.08801
gamma-glutamyl-epsilon-lysine	JPKNLFVGUZRHOB-YUMQZZPRSA-N	7015685	C(CCNC(=O)CC[C@@H](C(=O)O)N)C[C@@H](C(=O)O)N	0.961184	0.969341
gamma-glutamylhistidine	PXVCMZCJAUJLJP-YUMQZZPRSA-N	7017195	C1=C(NC=N1)C[C@@H](C(=O)O)NC(=O)CC[C@@H](C(=O)O)N	0.755971	1.00803
palmitoyl-linoleoyl-glycerol (16:0/18:2) [1]*	SVXWJFFKLMLOHO-YAIZGCQRSA-N	9543695	CCCCCCCCCCCCCCCC(=O)OC[C@H](CO)OC(=O)CCCCCCC/C=C\C/C=C\CCCCC	0.0209862	1.52966
1-palmitoyl-2-linoleoyl-GPE (16:0/18:2)	HBZNVZIRJWODIB-NHCUFCNUSA-N	9546747	CCCCCCCCCCCCCCCC(=O)OC[C@H](COP(=O)(O)OCCN)OC(=O)CCCCCCC/C=C\C/C=C\CCCCC	0.984156	0.927468
1-stearoyl-2-linoleoyl-GPE (18:0/18:2)*	YDTWOEYVDRKKCR-KNERPIHHSA-N	9546749	CCCCCCCCCCCCCCCCCC(=O)OC[C@H](COP(=O)(O)OCCN)OC(=O)CCCCCCC/C=C\C/C=C\CCCCC	0.0710965	0.958058
1-oleoyl-2-linoleoyl-GPE (18:1/18:2)*	GKAFCSRKMWFPSJ-RJXNKANHSA-N	9546753	CCCCCCCC/C=C\CCCCCCCC(=O)OC[C@H](COP(=O)(O)OCCN)OC(=O)CCCCCCC/C=C\C/C=C\CCCCC	0.396246	0.937828
1-stearoyl-2-docosahexaenoyl-GPE (18:0/22:6)*	XYYHNDVKALDFHQ-OXHZBIAZSA-N	9546798	CCCCCCCCCCCCCCCCCC(=O)OC[C@H](COP(=O)(O)OCCN)OC(=O)CC/C=C\C/C=C\C/C=C\C/C=C\C/C=C\C/C=C\CC	0.392179	0.932822
1-palmitoyl-2-docosahexaenoyl-GPE (16:0/22:6)*	MPWUZHVZZKSTPV-MADBQMNMSA-N	9546799	CCCCCCCCCCCCCCCC(=O)OC[C@H](COP(=O)(O)OCCN)OC(=O)CC/C=C\C/C=C\C/C=C\C/C=C\C/C=C\C/C=C\CC	0.33982	1.09951
1-palmitoyl-2-arachidonoyl-GPE (16:0/20:4)*	DRIVXEVMDWCWLI-CAQMIEAISA-N	9546800	CCCCCCCCCCCCCCCC(=O)OC[C@H](COP(=O)(O)OCCN)OC(=O)CCC/C=C\C/C=C\C/C=C\C/C=C\CCCCC	0.971756	1.00653
1-(1-enyl-stearoyl)-2-arachidonoyl-GPE (P-18:0/20:4)*	URPXXNCTXCOATD-FXMFQVEGSA-N	9547058	CCCCCCCCCCCCCCCC/C=C\OC[C@H](COP(=O)(O)OCCN)OC(=O)CCC/C=C\C/C=C\C/C=C\C/C=C\CCCCC	0.751979	1.02343
1-stearoyl-GPE (18:0)	BBYWOYAFBUOUFP-JOCHJYFZSA-N	9547068	CCCCCCCCCCCCCCCCCC(=O)OC[C@H](COP(=O)(O)OCCN)O	0.298706	1.07173
1-palmitoyl-GPE (16:0)	YVYMBNSKXOXSKW-HXUWFJFHSA-N	9547069	CCCCCCCCCCCCCCCC(=O)OC[C@H](COP(=O)(O)OCCN)O	0.755642	1.02091
1-oleoyl-GPE (18:1)	PYVRVRFVLRNJLY-MZMPXXGTSA-N	9547071	CCCCCCCC/C=C\CCCCCCCC(=O)OC[C@H](COP(=O)(O)OCCN)O	0.977632	0.991051
9-hydroxystearate	RKHXDCVAPIMDMG-UHFFFAOYSA-N	9570127	CCCCCCCCCC(CCCCCCCC(=O)O)O	0.0310106	1.20433
gulonate*	RGHNJXZEOKUKBD-NRXMZTRTSA-N	9794176	C([C@@H]([C@H]([C@H]([C@H](C(=O)O)O)O)O)O)O	0.325825	1.08967
N-acetylcarnosine	BKAYIFDRRZZKNF-VIFPVBQESA-N	9903482	CC(=O)NCCC(=O)N[C@@H](CC1=CN=CN1)C(=O)O	0.906958	0.996124
N-delta-acetylornithine	SRXKAYJJGAAOBP-UHFFFAOYSA-N	9920500	CC(=O)NCCCC(C(=O)O)N	0.344205	0.936001
epiandrosterone sulfate	ZMITXKRGXGRMKS-LUJOEAJASA-N	9929317	C[C@]12CC[C@@H](C[C@@H]1CC[C@@H]3[C@@H]2CC[C@]4([C@H]3CCC4=O)C)OS(=O)(=O)O	0.524222	0.903889
palmitoyl sphingomyelin (d18:1/16:0)	RWKUXQNLWDTSLO-GWQJGLRPSA-N	9939941	CCCCCCCCCCCCCCCC(=O)N[C@@H](COP(=O)([O-])OCC[N+](C)(C)C)[C@@H](/C=C/CCCCCCCCCCCCC)O	0.200673	1.02448
palmitoyl dihydrosphingomyelin (d18:0/16:0)*	QHZIGNLCLJPLCU-QPPIDDCLSA-N	9939965	CCCCCCCCCCCCCCC[C@H]([C@H](COP(=O)([O-])OCC[N+](C)(C)C)NC(=O)CCCCCCCCCCCCCCC)O	0.709406	0.99221
1-methylnicotinamide	LDHMAVIPBRSVRG-UHFFFAOYSA-N	10129985	C[N+]1=CC=CC(=C1)C(=N)[O-]	0.390607	0.990813
decanoylcarnitine (C10)	LZOSYCMHQXPBFU-UHFFFAOYSA-N	10245190	CCCCCCCCCC(=O)OC(CC(=O)[O-])C[N+](C)(C)C	0.564192	1.00011
laurylcarnitine (C12)	FUJLYHJROOYKRA-UHFFFAOYSA-N	10427569	CCCCCCCCCCCC(=O)OC(CC(=O)[O-])C[N+](C)(C)C	0.0127863	1.05601
1-palmitoyl-2-arachidonoyl-GPC (16:0/20:4n6)	IIZPXYDJLKNOIY-JXPKJXOSSA-N	10747814	CCCCCCCCCCCCCCCC(=O)OC[C@H](COP(=O)([O-])OCC[N+](C)(C)C)OC(=O)CCC/C=C\C/C=C\C/C=C\C/C=C\CCCCC	0.820671	0.994868
1-(1-enyl-palmitoyl)-GPC (P-16:0)*	HTZINLFNXLXRBC-CQLBIITFSA-N	10917802	CCCCCCCCCCCCCC/C=C\OC[C@H](COP(=O)([O-])OCC[N+](C)(C)C)O	0.0276937	1.14021
C-glycosyltryptophan	CPXSBHKDEPPWIX-RAYCSJGISA-N	10981970	C1=CC=C2C(=C1)C(=C(N2)[C@@H]3[C@H]([C@H]([C@@H]([C@H](O3)CO)O)O)O)C[C@@H](C(=O)O)N	0.673878	1.01921
cholesterol	HVYWMOMLDIMFJA-FNOPAARDSA-N	11025495	C[C@H](CCCC(C)C)[C@H]1CC[C@@H]2[C@@]1(CC[C@H]3[C@H]2CC=C4[C@@]3(CCC(C4)O)C)C	0.536373	1.01336
1-(1-enyl-palmitoyl)-2-palmitoyl-GPC (P-16:0/16:0)*	PEWXKAOBUSBJLD-MCBGMKGZSA-N	11146967	CCCCCCCCCCCCCCCC(=O)O[C@H](CO/C=C\CCCCCCCCCCCCCC)COP(=O)([O-])OCC[N+](C)(C)C	0.757249	1.01821
N-methylpipecolate	BPSLZWSRHTULGU-ZCFIWIBFSA-N	11286529	CN1CCCC[C@@H]1C(=O)O	0.827601	0.956034
sphingomyelin (d18:1/14:0, d16:1/16:0)*	KYICBZWZQPCUMO-PSALXKTOSA-N	11433862	CCCCCCCCCCCCC/C=C/[C@H]([C@H](COP(=O)([O-])OCC[N+](C)(C)C)NC(=O)CCCCCCCCCCCCC)O	0.746179	1.00351
14-HDoHE/17-HDoHE	ZNEBXONKCYFJAF-BGKMTWLOSA-N	11566378	CC/C=C\C/C=C\CC(/C=C/C=C\C/C=C\C/C=C\CCC(=O)O)O	1.26595e-06	4.00756
o-cresol sulfate	CYGSXDXRHXMAOV-UHFFFAOYSA-N	11615528	CC1=CC=CC=C1OS(=O)(=O)O	0.00121059	1.5535
pro-hydroxy-pro	ONPXCLZMBSJLSP-ALKRTJFJSA-N	11673055	C1C[C@H](NC1)C(=O)N2CC(C[C@H]2C(=O)O)O	0.0080345	1.07994
1-linoleoyl-GPC (18:2)	SPJFYYJXNPEZDW-UTJQPWESSA-N	11988421	CCCCC/C=C\C/C=C\CCCCCCCC(=O)OCC(COP(=O)([O-])OCC[N+](C)(C)C)O	0.555566	1.02035
glycoursodeoxycholate	GHCZAUBVMUEKKP-XROMFQGDSA-N	12310288	C[C@H](CCC(=O)NCC(=O)O)[C@H]1CC[C@@H]2[C@@]1(CC[C@H]3[C@H]2[C@H](C[C@H]4[C@@]3(CC[C@H](C4)O)C)O)C	0.403132	0.895329
androstenediol (3beta,17beta) monosulfate (1)	HXJFCUUBVWOORF-LOVVWNRFSA-N	13847309	C[C@]12CC[C@H]3[C@H]([C@@H]1CC[C@@H]2O)CC=C4[C@@]3(CC[C@@H](C4)OS(=O)(=O)O)C	0.209037	0.843526
gamma-glutamylisoleucine*	SNCKGJWJABDZHI-UHFFFAOYSA-N	14253342	CCC(C)C(C(=O)O)NC(=O)CCC(C(=O)O)N	0.56757	0.872547
2-palmitoyl-GPC (16:0)*	NEGQHKSYEYVFTD-HSZRJFAPSA-N	15061532	CCCCCCCCCCCCCCCC(=O)O[C@H](CO)COP(=O)([O-])OCC[N+](C)(C)C	0.739254	1.00808
1-oleoyl-GPC (18:1)	YAMUFBLWGFFICM-PTGWMXDISA-N	16081932	CCCCCCCC/C=C\CCCCCCCC(=O)OC[C@H](COP(=O)([O-])OCC[N+](C)(C)C)O	0.0639503	1.0474
1-stearoyl-2-arachidonoyl-GPC (18:0/20:4)	PSVRFUPOQYJOOZ-QNPWAGBNSA-N	16219824	CCCCCCCCCCCCCCCCCC(=O)OC[C@H](COP(=O)([O-])OCC[N+](C)(C)C)OC(=O)CCC/C=C\C/C=C\C/C=C\C/C=C\CCCCC	0.592618	1.01433
15-methylpalmitate	IIUXHTGBZYEGHI-UHFFFAOYSA-M	17903417	CC(C)CCCCCCCCCCCCCC(=O)[O-]	0.798683	1.00193
1-palmitoleoyl-GPC (16:1)*	LFUDDCMNKWEORN-ZXEGGCGDSA-N	24779461	CCCCCC/C=C\CCCCCCCC(=O)OC[C@H](COP(=O)([O-])OCC[N+](C)(C)C)O	0.200032	1.05043
ADSGEGDFXAEGGGVR*	JWICNZAGYSIBAR-UHFFFAOYSA-N	25081464	CC(C)CC(C(=O)NC(C)C(=O)NC(CCC(=O)O)C(=O)NCC(=O)NCC(=O)NCC(=O)NC(C(C)C)C(=O)NC(CCCN=C(N)N)C(=O)O)NC(=O)C(CC1=CC=CC=C1)NC(=O)C(CC(=O)O)NC(=O)CNC(=O)C(CCC(=O)O)NC(=O)CNC(=O)C(CO)NC(=O)C(CC(=O)O)NC(=O)C(C)N	2.44551e-09	0.101472
1-arachidonoyl-GPE (20:4n6)*	ROPRRXYVXLDXQO-XSQXPFHXSA-N	42607465	CCCCC/C=C\C/C=C\C/C=C\C/C=C\CCCC(=O)OC[C@H](COP(=O)(O)OCCN)O	0.515607	1.02812
N-oleoylserine	MBDKGXAMSZIDKF-VJIACCKLSA-N	44190514	CCCCCCCC/C=C\CCCCCCCC(=O)N[C@@H](CO)C(=O)O	0.0330899	1.36291
1-linoleoyl-GPE (18:2)*	DBHKHNGBVGWQJE-USWSLJGRSA-N	52925130	CCCCC/C=C\C/C=C\CCCCCCCC(=O)OC[C@H](COP(=O)(O)OCCN)O	0.56191	1.00531
1-linolenoylglycerol (18:3)	XQBHBEXBUZDCRY-FFXVNFNPSA-N	53480978	CCCCC/C=C\C/C=C\C/C=C\CCCCC(=O)OC[C@H](CO)O	0.457672	1.12689
adipoylcarnitine (C6-DC)	BSVHAXJKBCWVDA-UHFFFAOYSA-N	71296139	C[N+](C)(C)CC(CC(=O)[O-])OC(=O)CCCCC(=O)O	0.942233	0.975814
succinylcarnitine (C4-DC)	HAEVNYBCYZZDFL-UHFFFAOYSA-N	71464481	C[N+](C)(C)CC(CC(=O)[O-])OC(=O)CCC(=O)O	0.249843	0.933802
arachidonoylcarnitine (C20:4)	RBFQHRALHSUPIA-SNPVRQPZSA-N	71464486	CCCCC/C=C\C/C=C\C/C=C\C/C=C\CCCC(=O)OC(CC(=O)[O-])C[N+](C)(C)C	3.44818e-07	1.52196
glutarylcarnitine (C5-DC)	NXJAXUYOQLTISD-UHFFFAOYSA-N	71464488	C[N+](C)(C)CC(CC(=O)[O-])OC(=O)CCCC(=O)O	0.310436	0.925993
palmitoleoylcarnitine (C16:1)*	JFAGPSOZZSTLRF-KHPPLWFESA-N	71464547	CCCCCC/C=C\CCCCCCCC(=O)OC(CC(=O)[O-])C[N+](C)(C)C	0.000285132	1.09084
1-arachidonoyl-GPA (20:4)	XBFQFMCUPHZKTI-NZRYSPDRSA-L	71728371	CCCCC/C=C\C/C=C\C/C=C\C/C=C\CCCC(=O)OC[C@H](COP(=O)([O-])[O-])O	2.04166e-06	2.78706
beta-citrylglutamate	GAQNUGISBQJMKO-YFKPBYRVSA-J	72715786	C(CC(=O)[O-])[C@@H](C(=O)[O-])NC(=O)C(CC(=O)[O-])(CC(=O)[O-])O	0.00368366	1.37026
gamma-glutamylthreonine	GWNXFCYUJXASDX-UHFFFAOYSA-N	76078708	CC(C(C(=O)O)NC(=O)CCC(C(=O)O)N)O	0.0285519	1.0709
androstenediol (3beta,17beta) disulfate (1)	UWPTUYJASNIIJM-LOVVWNRFSA-N	87120982	C[C@]12CC[C@H]3[C@H]([C@@H]1CC[C@@H]2OS(=O)(=O)O)CCC4=C[C@H](CC[C@]34C)OS(=O)(=O)O	0.226414	0.840977
myristoleoylcarnitine (C14:1)*	ABVVZYXTZLEOHP-OLHLWXQYSA-N	90659872	CCCC/C=C\CCCCCCCC(=O)O[C@H](CC(=O)[O-])C[N+](C)(C)C	0.810415	1.01014
DSGEGDFXAEGGGVR*	JAMFMQAPZKXSKC-UHFFFAOYSA-N	132993922	CC(C)CC(C(=O)NC(C)C(=O)NC(CCC(=O)O)C(=O)NCC(=O)NCC(=O)NCC(=O)NC(C(C)C)C(=O)NC(CCCN=C(N)N)C(=O)O)NC(=O)C(CC1=CC=CC=C1)NC(=O)C(CC(=O)O)NC(=O)CNC(=O)C(CCC(=O)O)NC(=O)CNC(=O)C(CO)NC(=O)C(CC(=O)O)N	1.91187e-09	0.415481
ADpSGEGDFXAEGGGVR*	DROFZMGQYLJNLQ-UHFFFAOYSA-N	132993923	CC(C)CC(C(=O)NC(C)C(=O)NC(CCC(=O)O)C(=O)NCC(=O)NCC(=O)NCC(=O)NC(C(C)C)C(=O)NC(CCCN=C(N)N)C(=O)O)NC(=O)C(CC1=CC=CC=C1)NC(=O)C(CC(=O)O)NC(=O)CNC(=O)C(CCC(=O)O)NC(=O)CNC(=O)C(COP(=O)(O)O)NC(=O)C(CC(=O)O)NC(=O)C(C)N	6.66939e-05	0.592541
guanosine	NYHBQMYGNKIUIF-UUOKFMHZSA-N	135398635	C1=NC2=C(N1[C@H]3[C@@H]([C@@H]([C@H](O3)CO)O)O)N=C(NC2=O)N	8.19e-08	0.123351
inosine	UGQMRVRMYYASKQ-KQYNXXCUSA-N	135398641	C1=NC2=C(C(=O)N1)N=CN2[C@H]3[C@@H]([C@@H]([C@H](O3)CO)O)O	2.14785e-06	0.169468
7-methylguanine	FZWGECJQACGGTI-UHFFFAOYSA-N	135398679	CN1C=NC2=C1C(=O)NC(=N2)N	0.00186773	1.06463
N2,N2-dimethylguanosine	RSPURTUNRHNVGF-IOSLPCCCSA-N	135501639	CN(C)C1=NC2=C(C(=O)N1)N=CN2[C@H]3[C@@H]([C@@H]([C@H](O3)CO)O)O	0.077031	1.06891

## Sheet: Compound ChemRICH
Compound.Name	InChiKeys	Pubchem.ID	SMILES	pvalue	foldchange	CID	ClusterNumber	xlogp	ClusterLabel	TreeLabels	FDR
taurine	XOAAWQZATWQOTB-UHFFFAOYSA-N	1123	C(CS(=O)(=O)O)N	0	1.4	1123	24	-1.678	Alkanesulfonic Acids	e	0
hypotaurine	VVIUBCNYACGLLV-UHFFFAOYSA-N	107812	C(CS(=O)O)N	0	1.5	107812	24	-2.554	Alkanesulfonic Acids	e	0
serine	MTCFGRXMJLQNBG-REOHCLBHSA-N	5951	C([C@@H](C(=O)O)N)O	0	1.1	5951	88	-3.956	Amino Acids		0
aspartate	CKLJMWTZIZZHCS-REOHCLBHSA-N	5960	C([C@@H](C(=O)O)N)C(=O)O	0	1.9	5960	91	-3.707	Amino Acids, Acidic	j	0
ornithine	AHLPHDHHMVZTML-BYPYZUCNSA-N	6262	C(C[C@@H](C(=O)O)N)CN	0	1.3	6262	82	-3.307	Amino Acids, Basic		0
asparagine	DCXYFEDJOCDNAF-REOHCLBHSA-N	6267	C([C@@H](C(=O)O)N)C(=O)N	0	1.1	6267	91	-4.435	Amino Acids, Basic	j	0
sphingosine	WWUZIQQURGPMPG-CCEZHUSRSA-N	5353955	CCCCCCCCCCCCC/C=C/C(C(CO)N)O	0	1.5	5353955	37	6.018	Amino Alcohols		0
ADSGEGDFXAEGGGVR*	JWICNZAGYSIBAR-UHFFFAOYSA-N	25081464	CC(C)CC(C(=O)NC(C)C(=O)NC(CCC(=O)O)C(=O)NCC(=O)NCC(=O)NCC(=O)NC(C(C)C)C(=O)NC(CCCN=C(N)N)C(=O)O)NC(=O)C(CC1=CC=CC=C1)NC(=O)C(CC(=O)O)NC(=O)CNC(=O)C(CCC(=O)O)NC(=O)CNC(=O)C(CO)NC(=O)C(CC(=O)O)NC(=O)C(C)N	0	0.1	25081464	63	-11.354	Blood Coagulation Factors		0
DSGEGDFXAEGGGVR*	JAMFMQAPZKXSKC-UHFFFAOYSA-N	132993922	CC(C)CC(C(=O)NC(C)C(=O)NC(CCC(=O)O)C(=O)NCC(=O)NCC(=O)NCC(=O)NC(C(C)C)C(=O)NC(CCCN=C(N)N)C(=O)O)NC(=O)C(CC1=CC=CC=C1)NC(=O)C(CC(=O)O)NC(=O)CNC(=O)C(CCC(=O)O)NC(=O)CNC(=O)C(CO)NC(=O)C(CC(=O)O)N	0	0.42	132993922	63	-11.052	Blood Coagulation Factors		0
ADpSGEGDFXAEGGGVR*	DROFZMGQYLJNLQ-UHFFFAOYSA-N	132993923	CC(C)CC(C(=O)NC(C)C(=O)NC(CCC(=O)O)C(=O)NCC(=O)NCC(=O)NCC(=O)NC(C(C)C)C(=O)NC(CCCN=C(N)N)C(=O)O)NC(=O)C(CC1=CC=CC=C1)NC(=O)C(CC(=O)O)NC(=O)CNC(=O)C(CCC(=O)O)NC(=O)CNC(=O)C(COP(=O)(O)O)NC(=O)C(CC(=O)O)NC(=O)C(C)N	0	0.59	132993923	63	-12.583	Blood Coagulation Factors		0
fumarate	VZCYOOQTPOCHFL-OWOJBTEDSA-N	444972	C(=C/C(=O)O)\C(=O)O	0	1.2	444972	59	-0.416	Dicarboxylic Acids		0
dihydroorotate	UFIVEPVSAGBUSI-UHFFFAOYSA-N	648	C1C(NC(=O)NC1=O)C(=O)O	0	1.3	648	27	-1.675	Dipeptides		0
N-carbamoylaspartate	HLKXYZVTANABHZ-REOHCLBHSA-N	93072	C([C@@H](C(=O)O)NC(=O)N)C(=O)O	0	1.6	93072	27	-2.143	Dipeptides		0
glycylvaline	STKYPAFSDFAEPH-UHFFFAOYSA-N	97417	CC(C)C(C(=O)O)NC(=O)CN	0	13	97417	70	-2.997	Dipeptides		0
valylglycine	IOUPEELXVYPCPG-UHFFFAOYSA-N	136487	CC(C)C(C(=O)NCC(=O)O)N	0	1.7	136487	70	-2.997	Dipeptides		0
gamma-glutamylglutamine	JBFYFLXEJFQWMU-WDSKDSINSA-N	150914	C(CC(=O)N[C@@H](CCC(=O)N)C(=O)O)[C@@H](C(=O)O)N	0	1.2	150914	9	-4.904	Dipeptides		0
leucylalanine	HSQGMTRYSIHDAC-UHFFFAOYSA-N	259321	CC(C)CC(C(=O)NC(C)C(=O)O)N	0	5.1	259321	69	-1.691	Dipeptides		0
isoleucylglycine	UCGDDTHMMVWVMV-UHFFFAOYSA-N	342532	CCC(C)C(C(=O)NCC(=O)O)N	0	2.4	342532	69	-2.428	Dipeptides		0
sphingadienine	KWDXKYNWAKMLKK-YQMRQDNGSA-N	6449795	CCC/C=C\CCCCCCCC/C=C/C(C(CO)N)O	0	1.6	6449795	37	5.502	Ethanolamines		0
glutamate	WHUUTDBJXJRKMK-UHFFFAOYSA-N	611	C(CC(=O)O)C(C(=O)O)N	0	1.6	611	82	-3.349	Glutamates		0
1-arachidonylglycerol (20:4)	DCPCOKIYJYGMDN-DOFZRALJSA-N	5282281	CCCCC/C=C\C/C=C\C/C=C\C/C=C\CCCC(=O)OCC(CO)O	0	1.6	5282281	35	7.289	Glycerides		0
1-arachidonoyl-GPA (20:4)	XBFQFMCUPHZKTI-NZRYSPDRSA-L	71728371	CCCCC/C=C\C/C=C\C/C=C\C/C=C\CCCC(=O)OC[C@H](COP(=O)([O-])[O-])O	0	2.8	71728371	35	6.06	Glycerides		0
hypoxanthine	FDGQSTZJBFJUBT-UHFFFAOYSA-N	790	C1=NC2=C(N1)C(=O)N=CN2	0	1.4	790	1	0.556	Hypoxanthines		0
proline	ONIBWKKTOPOVIA-BYPYZUCNSA-N	145742	C1C[C@H](NC1)C(=O)O	0	1	145742	50	-0.185	Imino Acids	i	0
lactate	JVTAAEKCZFNVCJ-UHFFFAOYSA-N	612	CC(C(=O)O)O	0	1.4	612	45	-0.591	Lactates		0
arachidonoyl ethanolamide	LGEQQWMQCRIYKG-DOFZRALJSA-N	5281969	CCCCC/C=C\C/C=C\C/C=C\C/C=C\CCCC(=O)NCCO	0	1.6	5281969	36	7.43	Linoleic Acids		0
methionine sulfoxide	QEFRNWWLZKMPFJ-YGVKFDHGSA-N	158980	CS(=O)CC[C@@H](C(=O)O)N	0	1.2	158980	67	-3.882	Methionine		0
oleoylcarnitine (C18:1)	IPOLTUVFXFHAHI-SEYXRHQNSA-N	6441392	CCCCCCCC/C=C\CCCCCCCC(=O)OC(CC(=O)[O-])C[N+](C)(C)C	0	1.2	6441392	19	7.271	NewCluster_19		0
linoleoylcarnitine (C18:2)*	MJLXQSQYKZWZCB-DQFWFXSYSA-N	6450015	CCCCC/C=C\C/C=C\CCCCCCCC(=O)O[C@H](CC(=O)[O-])C[N+](C)(C)C	0	1.3	6450015	19	6.944	NewCluster_19		0
arachidonoylcarnitine (C20:4)	RBFQHRALHSUPIA-SNPVRQPZSA-N	71464486	CCCCC/C=C\C/C=C\C/C=C\C/C=C\CCCC(=O)OC(CC(=O)[O-])C[N+](C)(C)C	0	1.5	71464486	19	7.428	NewCluster_19		0
palmitoleoylcarnitine (C16:1)*	JFAGPSOZZSTLRF-KHPPLWFESA-N	71464547	CCCCCC/C=C\CCCCCCCC(=O)OC(CC(=O)[O-])C[N+](C)(C)C	0	1.1	71464547	19	6.133	NewCluster_19		0
sebacate (decanedioate)	CXMXRPHRNRROMY-UHFFFAOYSA-N	5192	C(CCCCC(=O)O)CCCC(=O)O	0	1.8	5192	6	2.282	O=FA_10_1		0
12-HHTrE	KUKJHGXXZWHSBG-WBGSEQOASA-N	5283141	CCCCC[C@@H](/C=C/C=C/C/C=C\CCCC(=O)O)O	0	1.8	5283141	34	5.033	OH-FA_17_3_1		0
12-HETE	ZNHVWPKMFKADKW-FYMOKONMSA-N	5312983	CCCCC/C=C\CC(/C=C\C=C/C/C=C/CCCC(=O)O)O	0	2.9	5312983	34	6.224	OH-FA_17_3_1		0
14-HDoHE/17-HDoHE	ZNEBXONKCYFJAF-BGKMTWLOSA-N	11566378	CC/C=C\C/C=C\CC(/C=C/C=C\C/C=C\C/C=C\CCC(=O)O)O	0	4	11566378	34	6.708	OH-FA_17_3_1		0
adenosine	OIRDTQYFTABQOQ-KQYNXXCUSA-N	60961	C1=NC2=C(C(=N1)N)N=CN2[C@H]3[C@@H]([C@@H]([C@H](O3)CO)O)O	0	0.02	60961	41	-2.367	Purine Nucleosides		0
guanosine	NYHBQMYGNKIUIF-UUOKFMHZSA-N	135398635	C1=NC2=C(N1[C@H]3[C@@H]([C@@H]([C@H](O3)CO)O)O)N=C(NC2=O)N	0	0.12	135398635	20	-2.272	Purine Nucleosides		0
inosine	UGQMRVRMYYASKQ-KQYNXXCUSA-N	135398641	C1=NC2=C(C(=O)N1)N=CN2[C@H]3[C@@H]([C@@H]([C@H](O3)CO)O)O	0	0.17	135398641	20	-1.947	Purine Nucleosides		0
S-1-pyrroline-5-carboxylate	DWAKNKKXGALPNW-UHFFFAOYSA-N	1196	C1CC(N=C1)C(=O)O	0	0.68	1196	54	-0.233	Pyrroles	d	0
sphinganine	OTKJDMGTUTTYMP-UHFFFAOYSA-N	3126	CCCCCCCCCCCCCCCC(C(CO)N)O	0	1.3	3126	37	6.268	Saturated_Ceramides		0
leucylglycine	VVHOUVWJCQOYGG-UHFFFAOYSA-N	97856	C(C(C(=O)O)N=C(N)N)C(=O)O	0	3	97856	91	-4.223	Succinates	j	0
serotonin	QZAYGJVTTNCVMB-UHFFFAOYSA-N	5202	C1=CC2=C(C=C1O)C(=CN2)CCN	0	0.72	5202	126	0.366	Tryptamines		0
arginine	ODKSFYDXXFIFQN-UHFFFAOYSA-N	232	C(CC(C(=O)O)N)CN=C(N)N	0.001	0.89	232	78	-3.585	Amino Acids, Basic		0.45
alpha-ketobutyrate	TYEYBOSBBBHJIV-UHFFFAOYSA-N	58	CCC(=O)C(=O)O	0.001	0.67	58	81	-0.173	Butyrates		0.45
o-cresol sulfate	CYGSXDXRHXMAOV-UHFFFAOYSA-N	11615528	CC1=CC=CC=C1OS(=O)(=O)O	0.001	1.6	11615528	23	-0.719	Cresols		0.45
stearoyl ethanolamide	OTGQIQQTPXJQRG-UHFFFAOYSA-N	27902	CCCCCCCCCCCCCCCCCC(=O)NCCO	0.001	1.3	27902	55	7.789	Ethanolamines		0.45
azelate (nonanedioate)	BDJRBEYXGGNYIS-UHFFFAOYSA-N	2266	C(CCCC(=O)O)CCCC(=O)O	0.001	1.6	2266	6	1.713	O=FA_10_1		0.45
adenosine 3',5'-cyclic monophosphate (cAMP)	IVOMOUWHDPKRLL-KQYNXXCUSA-N	6076	C1[C@@H]2[C@H]([C@H]([C@@H](O2)N3C=NC4=C3N=CN=C4N)O)OP(=O)(O1)O	0.001	0.65	6076	41	-3.436	Purine Nucleosides		0.45
xanthine	LRFVTYWOQMYALW-UHFFFAOYSA-N	1188	C1=NC2=C(N1)C(=O)NC(=O)N2	0.001	1.6	1188	1	-0.654	Xanthines		0.45
glycine	DHMQDGOQFOQNFH-UHFFFAOYSA-N	750	C(C(=O)O)N	0.002	1	750	92	-3.35	Amino Acids		0.89
gamma-glutamylglutamate	OWQDWQKWSLFFFR-WDSKDSINSA-N	92865	C(CC(=O)N[C@@H](CCC(=O)O)C(=O)O)[C@@H](C(=O)O)N	0.002	1.3	92865	9	-4.176	Dipeptides		0.89
threonylphenylalanine	IQHUITKNHOKGFC-UHFFFAOYSA-N	4099799	CC(C(C(=O)NC(CC1=CC=CC=C1)C(=O)O)N)O	0.002	2	4099799	25	-2.549	Dipeptides		0.89
allantoin	POJWUDADGALRAB-UHFFFAOYSA-N	204	C1(C(=O)NC(=O)N1)NC(=O)N	0.002	1.5	204	135	-1.169	Hydantoins	b	0.89
7-methylguanine	FZWGECJQACGGTI-UHFFFAOYSA-N	135398679	CN1C=NC2=C1C(=O)NC(=N2)N	0.002	1.1	135398679	1	-0.888	Hypoxanthines		0.89
linoleoyl ethanolamide	KQXDGUVSAAQARU-HZJYTTRNSA-N	5283446	CCCCC/C=C\C/C=C\CCCCCCCC(=O)NCCO	0.002	1.4	5283446	36	6.946	Linoleic Acids		0.89
suberate (octanedioate)	TYFQFVWCELRYAO-UHFFFAOYSA-N	10457	C(CCCC(=O)O)CCC(=O)O	0.002	1.4	10457	6	1.144	O=FA_10_1		0.89
stearamide	LYRFLYHAGKPMFH-UHFFFAOYSA-N	31292	CCCCCCCCCCCCCCCCCC(=O)N	0.002	1.6	31292	97	7.98	Saturated_Fatty Acids		0.89
1-palmitoyl-GPC (16:0)	ASWBNKHCZGQVJV-UHFFFAOYSA-N	86554	CCCCCCCCCCCCCCCC(=O)OCC(COP(=O)([O-])OCC[N+](C)(C)C)O	0.002	1.1	86554	29	5.462	Saturated_Lysophosphatidylcholines	a	0.89
sphingosine 1-phosphate	DUYSYHSSBDVJSM-KRWOKUGFSA-N	5283560	CCCCCCCCCCCCC/C=C/[C@H]([C@H](COP(=O)(O)O)N)O	0.002	1.4	5283560	37	4.789	Unsaturated_Lysophospholipids		0.89
choline	OEYIOHPDSNJKLS-UHFFFAOYSA-N	305	C[N+](C)(C)CCO	0.003	1.2	305	46	-0.837	Ethanolamines		1
beta-citrylglutamate	GAQNUGISBQJMKO-YFKPBYRVSA-J	72715786	C(CC(=O)[O-])[C@@H](C(=O)[O-])NC(=O)C(CC(=O)[O-])(CC(=O)[O-])O	0.004	1.4	72715786	134	-4.998	Glutamates		1
15-HETE	JSFATNQSLKRBCI-VAEKSGALSA-N	5280724	CCCCC[C@@H](/C=C/C=C\C/C=C\C/C=C\CCCC(=O)O)O	0.004	1.8	5280724	34	6.413	OH-FA_17_3_1		1
myristoylcarnitine (C14)	PSHXNVGSVNEJBD-UHFFFAOYSA-N	6426854	CCCCCCCCCCCCCC(=O)OC(CC(=O)[O-])C[N+](C)(C)C	0.004	1.1	6426854	5	5.511	Saturated_Fatty Acids		1
phenylalanine	COLNVLDHVKWLRT-QMMMGPOBSA-N	6140	C1=CC=C(C=C1)C[C@@H](C(=O)O)N	0.006	1	6140	25	-1.575	Amino Acids, Aromatic		1
3-sulfo-L-alanine	XVOYSCVBGLVSOL-REOHCLBHSA-N	72886	C([C@@H](C(=O)O)N)S(=O)(=O)O	0.006	1.6	72886	65	-4.359	Amino Acids, Sulfur		1
4-guanidinobutanoate	TUHVEAJXIMEOSA-UHFFFAOYSA-N	500	C(CC(=O)O)CN=C(N)N	0.006	1.2	500	54	-0.946	Guanidines	d	1
glycerate	RBNPOMFGQQGHHO-UHFFFAOYSA-N	752	C(C(C(=O)O)O)O	0.007	1.1	752	66	-1.723	Sugar Acids		1
pro-hydroxy-pro	ONPXCLZMBSJLSP-ALKRTJFJSA-N	11673055	C1C[C@H](NC1)C(=O)N2CC(C[C@H]2C(=O)O)O	0.008	1.1	11673055	50	-1.292	Dipeptides	i	1
lysine	KDXKERNSBIXSRK-YFKPBYRVSA-N	5962	C(CCN)C[C@@H](C(=O)O)N	0.009	1	5962	44	-2.949	Amino Acids, Basic	c	1
2-arachidonoylglycerol (20:4)	RCRCTBLIHCHWDZ-DOFZRALJSA-N	5282280	CCCCC/C=C\C/C=C\C/C=C\C/C=C\CCCC(=O)OC(CO)CO	0.01	1.4	5282280	35	7.289	Glycerides		1
N1-methylinosine	WJNGQIYEQLPJMN-IOSLPCCCSA-N	65095	CN1C=NC2=C(C1=O)N=CN2[C@H]3[C@@H]([C@@H]([C@H](O3)CO)O)O	0.01	1.1	65095	20	-1.805	Purine Nucleosides		1
phosphoethanolamine	SUHOOTKUPISOBE-UHFFFAOYSA-N	1015	C(COP(=O)(O)O)N	0.011	1.4	1015	133	-2.504	Ethanolamines	g	1
5-oxoproline	ODHCTXKNWHHXJC-VKHMYHEASA-N	7405	C1CC(=O)N[C@@H]1C(=O)O	0.011	1.2	7405	50	-0.827	Pyrrolidinones	i	1
palmitoylcarnitine (C16)	XOMRRQXKHMYMOC-UHFFFAOYSA-N	461	CCCCCCCCCCCCCCCC(=O)OC(CC(=O)[O-])C[N+](C)(C)C	0.012	1.2	461	5	6.649	Carnitine		1
laurylcarnitine (C12)	FUJLYHJROOYKRA-UHFFFAOYSA-N	10427569	CCCCCCCCCCCC(=O)OC(CC(=O)[O-])C[N+](C)(C)C	0.013	1.1	10427569	5	4.373	Carnitine		1
gamma-glutamylglycine	ACIJGUBIMXQCMF-BYPYZUCNSA-N	165527	C(CC(=O)NCC(=O)O)[C@@H](C(=O)O)N	0.016	1.1	165527	9	-4.177	Dipeptides		1
succinate	KDYFGRWQOYBRFD-UHFFFAOYSA-N	1110	C(CC(=O)O)C(=O)O	0.017	1.1	1110	87	-0.71	Succinates		1
thioproline	DZLNHFMRPBPULJ-VKHMYHEASA-N	93176	C1[C@H](NCS1)C(=O)O	0.017	1.1	93176	73	-0.288	Thiazoles		1
1-palmitoylglycerol (16:0)	QHZLMUACJMDIAE-UHFFFAOYSA-N	14900	CCCCCCCCCCCCCCCC(=O)OCC(CO)O	0.018	1.2	14900	56	6.51	Glycerides	m	1
alanine	QNAYBMKLOCPYGJ-REOHCLBHSA-N	5950	C[C@@H](C(=O)O)N	0.019	1	5950	75	-2.824	Amino Acids		1
glycerophosphoserine*	ZWZWYGMENQVNFU-AKGZTFGVSA-N	3081457	C([C@@H](C(=O)O)N)OP(=O)(O)OCC(CO)O	0.019	1.8	3081457	88	-6.047	Phosphatidylethanolamines		1
stearoylcarnitine (C18)	FNPHNLNTJNMAEE-UHFFFAOYSA-N	6426855	CCCCCCCCCCCCCCCCCC(=O)OC(CC(=O)[O-])C[N+](C)(C)C	0.021	1.1	6426855	5	7.787	Carnitine		1
palmitoyl-linoleoyl-glycerol (16:0/18:2) [1]*	SVXWJFFKLMLOHO-YAIZGCQRSA-N	9543695	CCCCCCCCCCCCCCCC(=O)OC[C@H](CO)OC(=O)CCCCCCC/C=C\C/C=C\CCCCC	0.021	1.5	9543695	11	15.195	Glycerides		1
1-myristoylglycerol (14:0)	DCBSHORRWZKAKO-UHFFFAOYSA-N	79050	CCCCCCCCCCCCCC(=O)OCC(CO)O	0.022	1.2	79050	56	5.372	Saturated_Fatty Acids	m	1
myo-inositol	CDAISMWEOUEBRE-UHFFFAOYSA-N	892	C1(C(C(C(C(C1O)O)O)O)O)O	0.024	1.2	892	128	-1.458	Sugar Alcohols		1
gamma-glutamyltryptophan	CATMPQFFVNKDEY-UHFFFAOYSA-N	3989307	C1=CC=C2C(=C1)C(=CN2)CC(C(=O)O)NC(=O)CCC(C(=O)O)N	0.025	0.93	3989307	12	-2.85	Dipeptides		1
arabitol/xylitol	HEBKCHPVOIAQTA-NGQZWQHPSA-N	6912	C([C@H](C([C@H](CO)O)O)O)O	0.025	1.1	6912	49	-3.224	Sugar Alcohols		1
beta-hydroxyisovalerate	AXFYFNCPONWUHW-UHFFFAOYSA-N	69362	CC(C)(CC(=O)O)O	0.025	0.82	69362	130	-0.082	Valerates		1
N-acetylneuraminate	SQVRNKJHWKZAKO-LUWBGTNYSA-N	439197	CC(=O)N[C@@H]1[C@H](CC(O[C@H]1[C@@H]([C@@H](CO)O)O)(C(=O)O)O)O	0.026	1.2	439197	94	-3.525	Sialic Acids		1
erythronate*	JPIJQSOTBSSVTP-PWNYCUMCSA-N	2781043	C([C@H]([C@H](C(=O)O)O)O)O	0.027	1.1	2781043	32	-2.395	Butyrates		1
nicotinamide	DFPAKSUCGFBDDF-UHFFFAOYSA-N	936	C1=CC(=CN=C1)C(=O)N	0.027	1.2	936	13	-1.236	Pyridines		1
N-palmitoylglycine	KVTFEOAKFFQCCX-UHFFFAOYSA-N	151008	CCCCCCCCCCCCCCCC(=O)NCC(=O)O	0.027	0.88	151008	55	6.742	Saturated_Fatty Acids		1
1-stearoyl-GPC (18:0)	IHNKQIMGVNPMTC-RUZDIDTESA-N	497299	CCCCCCCCCCCCCCCCCC(=O)OC[C@H](COP(=O)([O-])OCC[N+](C)(C)C)O	0.027	1.1	497299	29	6.6	Saturated_Lysophosphatidylcholines	a	1
3-methylxanthine	GMSNIKWWOQHZGF-UHFFFAOYSA-N	70639	CN1C2=C(C(=O)NC1=O)NC=N2	0.027	0.9	70639	1	-0.512	Xanthines		1
deoxycarnitine	JHPNVNIEXXLNTR-UHFFFAOYSA-O	134	C[N+](C)(C)CCCC(=O)O	0.028	1	134	53	-0.23	Carnitine		1
1-(1-enyl-palmitoyl)-GPC (P-16:0)*	HTZINLFNXLXRBC-CQLBIITFSA-N	10917802	CCCCCCCCCCCCCC/C=C\OC[C@H](COP(=O)([O-])OCC[N+](C)(C)C)O	0.028	1.1	10917802	39	6	Unsaturated_Lysophospholipids		1
gamma-glutamylleucine	MYFMARDICOWMQP-YUMQZZPRSA-N	151023	CC(C)C[C@@H](C(=O)O)NC(=O)CC[C@@H](C(=O)O)N	0.029	1.1	151023	64	-2.216	Dipeptides		1
gamma-glutamylthreonine	GWNXFCYUJXASDX-UHFFFAOYSA-N	76078708	CC(C(C(=O)O)NC(=O)CCC(C(=O)O)N)O	0.029	1.1	76078708	9	-4.323	Dipeptides		1
methionine sulfone	UCUNFLYVYCGDHP-UHFFFAOYSA-N	69961	CS(=O)(=O)CCC(C(=O)O)N	0.029	1.1	69961	67	-3.074	Methionine		1
cysteine s-sulfate	NOKPBJYHPHHWAN-REOHCLBHSA-N	115015	C([C@@H](C(=O)O)N)SS(=O)(=O)O	0.031	1.3	115015	65	-4.104	Amino Acids, Sulfur		1
9-hydroxystearate	RKHXDCVAPIMDMG-UHFFFAOYSA-N	9570127	CCCCCCCCCC(CCCCCCCC(=O)O)O	0.031	1.2	9570127	16	6.623	OH-FA_16_0_1		1
pyruvate	LCTONWCANYUPML-UHFFFAOYSA-N	1060	CC(=O)C(=O)O	0.031	0.87	1060	81	-0.426	Pyruvates		1
N-oleoylserine	MBDKGXAMSZIDKF-VJIACCKLSA-N	44190514	CCCCCCCC/C=C\CCCCCCCC(=O)N[C@@H](CO)C(=O)O	0.033	1.4	44190514	36	6.758	Linoleic Acids		1
hexanoylcarnitine (C6)	VVPRQWTYSNDTEA-UHFFFAOYSA-N	6426853	CCCCCC(=O)OC(CC(=O)[O-])C[N+](C)(C)C	0.034	0.94	6426853	109	0.959	Carnitine	s	1
gamma-glutamylmethionine	RQNSKRXMANOPQY-BQBZGAKWSA-N	7009567	CSCC[C@@H](C(=O)O)NC(=O)CC[C@@H](C(=O)O)N	0.034	1.1	7009567	123	-2.68	Dipeptides	p	1
palmitic amide	HSEMFIZWXHQJAE-UHFFFAOYSA-N	69421	CCCCCCCCCCCCCCCC(=O)N	0.034	1.4	69421	97	6.842	Saturated_Fatty Acids		1
3-hydroxybutyrate (BHBA)	WHBMMWSBFZVSSR-UHFFFAOYSA-N	441	CC(CC(=O)O)O	0.036	0.91	441	79	-0.499	Butyrates		1
malate	BJEPYKJPYRNKOW-UHFFFAOYSA-N	525	C(C(C(=O)O)O)C(=O)O	0.037	1.1	525	32	-1.474	Dicarboxylic Acids		1
oleoyl ethanolamide	BOWVQLFMWHZBEF-KTKRTIGZSA-N	5283454	CCCCCCCC/C=C\CCCCCCCC(=O)NCCO	0.04	1.2	5283454	36	7.273	Oleic Acids		1
oleamide	FATBGEAMYMYZAF-KTKRTIGZSA-N	5283387	CCCCCCCC/C=C\CCCCCCCC(=O)N	0.042	1.3	5283387	101	7.464	Oleic Acids		1
3-hydroxydecanoate	FYSSBMZUBSBFJL-UHFFFAOYSA-N	26612	CCCCCCCC(CC(=O)O)O	0.043	1.1	26612	16	2.704	OH-FA_8_0_1		1
gamma-glutamylvaline	AQAKHZVPOOGUCK-XPUUQOCRSA-N	7015683	CC(C)[C@@H](C(=O)O)NC(=O)CC[C@@H](C(=O)O)N	0.045	1.1	7015683	64	-2.996	Dipeptides		1
2-hydroxyoctanoate	JKRDADVRIYVCCY-UHFFFAOYSA-N	94180	CCCCCCC(C(=O)O)O	0.045	1.1	94180	31	2.043	OH-FA_8_0_1		1
xanthurenate	FBZONXHGGPHHIY-UHFFFAOYSA-N	5699	C1=CC2=C(C(=C1)O)NC(=CC2=O)C(=O)O	0.046	1.1	5699	115	0.802	Xanthurenates		1
tartronate (hydroxymalonate)	ROBFUDYVXSDBQM-UHFFFAOYSA-N	45	C(C(=O)O)(C(=O)O)O	0.049	0.86	45	66	-1.29	Dicarboxylic Acids		1
retinol (Vitamin A)	FPIPGXGPPPQFEQ-OVSJKPMPSA-N	445354	CC1=C(C(CCC1)(C)C)/C=C/C(=C/C=C/C(=C/CO)/C)/C	0.052	1	445354	131	6.158	Retinoids		1
3-hydroxy-2-ethylpropionate	ZMZQVAUJTDKQGE-UHFFFAOYSA-N	188979	CCC(CO)C(=O)O	0.052	1.1	188979	79	-0.097	Valerates		1
1-oleoyl-GPC (18:1)	YAMUFBLWGFFICM-PTGWMXDISA-N	16081932	CCCCCCCC/C=C\CCCCCCCC(=O)OC[C@H](COP(=O)([O-])OCC[N+](C)(C)C)O	0.064	1	16081932	39	6.084	Unsaturated_Lysophosphatidylcholines		1
4-hydroxyphenylpyruvate	KKADPXVIOXHVKN-UHFFFAOYSA-N	979	C1=CC(=CC=C1CC(=O)C(=O)O)O	0.07	0.81	979	48	-0.229	Pyruvates		1
N6,N6,N6-trimethyllysine	MXNRLFUSFKVQSK-QMMMGPOBSA-N	440120	C[N+](C)(C)CCCC[C@@H](C(=O)[O-])N	0.071	1	440120	83	-2.992	Amino Acids, Diamino	f	1
1-stearoyl-2-linoleoyl-GPE (18:0/18:2)*	YDTWOEYVDRKKCR-KNERPIHHSA-N	9546749	CCCCCCCCCCCCCCCCCC(=O)OC[C@H](COP(=O)(O)OCCN)OC(=O)CCCCCCC/C=C\C/C=C\CCCCC	0.071	0.96	9546749	4	14.847	Phosphatidylethanolamines		1
3-hydroxy-3-methylglutarate	NPOAOTPXWNWTSH-UHFFFAOYSA-N	1662	CC(CC(=O)O)(CC(=O)O)O	0.074	1.1	1662	51	-0.965	Glutarates		1
erythritol	UNXHWFMMPAWVPI-ZXZARUISSA-N	222285	C([C@H]([C@H](CO)O)O)O	0.075	1.1	222285	49	-2.552	Sugar Alcohols		1
N2,N2-dimethylguanosine	RSPURTUNRHNVGF-IOSLPCCCSA-N	135501639	CN(C)C1=NC2=C(C(=O)N1)N=CN2[C@H]3[C@@H]([C@@H]([C@H](O3)CO)O)O	0.077	1.1	135501639	20	-1.246	Purine Nucleosides		1
acetoacetate	WDJHALXBUFZDSR-UHFFFAOYSA-N	96	CC(=O)CC(=O)O	0.078	0.79	96	130	-0.034	Keto Acids		1
N-acetylglutamate	RFMMMVDNIPUKGG-YFKPBYRVSA-N	70914	CC(=O)N[C@@H](CCC(=O)O)C(=O)O	0.08	1.1	70914	124	-0.907	Glutamates		1
carnitine	PHIQHXFUZVPYII-ZCFIWIBFSA-N	10917	C[N+](C)(C)C[C@@H](CC(=O)[O-])O	0.081	0.98	10917	14	-1.741	Trimethyl Ammonium Compounds		1
2-hydroxyadipate	OTTXIFWBPRRYOG-UHFFFAOYSA-N	193530	C(CC(C(=O)O)O)CC(=O)O	0.082	0.72	193530	7	-0.758	Adipates		1
1-oleoylglycerol (18:1)	RZRNAYUHWVFMIP-KTKRTIGZSA-N	5283468	CCCCCCCC/C=C\CCCCCCCC(=O)OCC(CO)O	0.082	1.2	5283468	11	7.132	Oleic Acids		1
phenylacetylglutamine	JFLIEFSWGNOPJJ-JTQLQIEISA-N	92258	C1=CC=C(C=C1)CC(=O)N[C@@H](CCC(=O)N)C(=O)O	0.084	1	92258	25	-0.302	Dipeptides		1
linoleamide (18:2n6)	SFIHQZFZMWZOJV-HZJYTTRNSA-N	6435901	CCCCC/C=C\C/C=C\CCCCCCCC(=O)N	0.09	1.2	6435901	101	7.137	Linoleic Acids		1
cinnamoylglycine	YAADMLWHGMUGQL-VOTSOKGWSA-N	709625	C1=CC=C(C=C1)/C=C/C(=O)NCC(=O)O	0.091	0.9	709625	125	1.059	Ethanolamines		1
cortisol	JYGXADMDTFJGBT-VWUMJDOOSA-N	5754	C[C@]12CCC(=O)C=C1CC[C@@H]3[C@@H]2[C@H](C[C@]4([C@H]3CC[C@@]4(C(=O)CO)O)C)O	0.091	0.93	5754	119	0.553	Pregnenes		1
tryptophan	QIVBCDIJIAJPQS-VIFPVBQESA-N	6305	C1=CC=C2C(=C1)C(=CN2)C[C@@H](C(=O)O)N	0.093	1	6305	12	-2.023	Amino Acids, Aromatic		1
3-hydroxyoctanoate	NDPLAKGOSZHTPH-UHFFFAOYSA-N	26613	CCCCCC(CC(=O)O)O	0.099	1	26613	16	1.566	OH-FA_8_0_1		1
cysteine	XUJNEKJLAYXESH-REOHCLBHSA-N	5862	C([C@@H](C(=O)O)N)S	0.1	0.93	5862	84	-2.575	Amino Acids, Sulfur		1
N-acetylproline	GNMSLDIYJOSUSW-UHFFFAOYSA-N	322640	CC(=O)N1CCCC1C(=O)O	0.1	1.1	322640	71	-0.157	Imino Acids		1
ursodeoxycholate	RUDATBOHQWOJDD-UZVSRGJWSA-N	31401	C[C@H](CCC(=O)O)[C@H]1CC[C@@H]2[C@@]1(CC[C@H]3[C@H]2[C@H](C[C@H]4[C@@]3(CC[C@H](C4)O)C)O)C	0.11	0.83	31401	10	6.178	Deoxycholic Acid		1
piperine	MXXWOMGUGJBKIW-YPCIICBESA-N	638024	C1CCN(CC1)C(=O)/C=C/C=C/C2=CC3=C(C=C2)OCO3	0.11	1	638024	93	2.518	Polyunsaturated Alkamides	h	1
cystine	LEVWYRKDKASIDU-IMJSIDKUSA-N	67678	C([C@@H](C(=O)O)N)SSC[C@@H](C(=O)O)N	0.12	0.91	67678	84	-3.312	Amino Acids, Sulfur		1
N-acetyl-beta-alanine	LJLLAWRMBZNPMO-UHFFFAOYSA-N	76406	CC(=O)NCCC(=O)O	0.12	0.81	76406	53	-0.75	Dipeptides		1
palmitoyl ethanolamide	HXYVTAGFYLMHSO-UHFFFAOYSA-N	4671	CCCCCCCCCCCCCCCC(=O)NCCO	0.12	1.1	4671	55	6.651	Ethanolamines		1
glutarate (pentanedioate)	JFCQEDHGNNZCLN-UHFFFAOYSA-N	743	C(CC(=O)O)CC(=O)O	0.12	1.1	743	127	-0.352	Glutarates		1
1-methylimidazoleacetate	ZHCKPJGJQOPTLB-UHFFFAOYSA-N	75810	CN1C=C(N=C1)CC(=O)O	0.12	1	75810	58	0.017	Imidazoles		1
N-acetyltaurine	CXJAAWRLVGAKDV-UHFFFAOYSA-N	159864	CC(=O)NCCS(=O)(=O)O	0.13	1.2	159864	24	-1.402		e	1
2-hydroxydecanoate	GHPVDCPCKSNJDR-UHFFFAOYSA-N	21488	CCCCCCCCC(C(=O)O)O	0.13	1	21488	31	3.181	OH-FA_8_0_1		1
5-acetylamino-6-formylamino-3-methyluracil	RDZNZFGKEVDNPK-UHFFFAOYSA-N	108214	CC(=O)NC1=C(NC(=O)N(C1=O)C)NC=O	0.13	1.1	108214	1	-0.786	Xanthenes		1
bilirubin (E,Z or Z,E)*	BPYKTIZUTYGOLE-VVCLLGATSA-N	5799469	CC1=C(NC(=C1CCC(=O)O)CC2=C(C(=C(N2)/C=C/3\C(=C(C(=O)N3)C)C=C)C)CCC(=O)O)/C=C\4/C(=C(C(=O)N4)C=C)C	0.14	1.1	5799469	33	2.167	Bile Pigments	q	1
3b-hydroxy-5-cholenoic acid	HIAJCGFYHIANNA-QIZZZRFXSA-N	92997	C[C@H](CCC(=O)O)[C@H]1CC[C@@H]2[C@@]1(CC[C@H]3[C@H]2CC=C4[C@@]3(CC[C@@H](C4)O)C)C	0.14	0.89	92997	18	6.998	Cholic Acids		1
glucose	WQZGKKKJIJFFOK-DVKNGEFBSA-N	79025	C([C@@H]1[C@H]([C@@H]([C@H]([C@H](O1)O)O)O)O)O	0.14	0.97	79025	57	-1.697	Hexoses		1
sarcosine	FSYKKLYZXJSNPZ-UHFFFAOYSA-N	1088	CNCC(=O)O	0.14	0.98	1088	92	-0.794	N-substituted Glycines		1
pipecolate	HXEACLLIILLPRG-UHFFFAOYSA-N	849	C1CCNC(C1)C(=O)O	0.14	1	849	83	0.173	Pipecolic Acids	f	1
glycerol	PEDCQBHIVMGVHV-UHFFFAOYSA-N	753	C(C(CO)O)O	0.14	0.93	753	49	-1.88	Sugar Alcohols		1
mead acid (20:3n9)	UNSRRHDPHVZAHH-YOILPLPUSA-N	5312531	CCCCCCCC/C=C\C/C=C\C/C=C\CCCC(=O)O	0.15	1.1	5312531	22	8.676	UnSaturated FA		1
N-acetylglucosaminylasparagine	YTTRPBWEMMPYSW-HRRFRDKFSA-N	123826	CC(=O)N[C@@H]1[C@H]([C@@H]([C@H](O[C@H]1NC(=O)C[C@@H](C(=O)O)N)CO)O)O	0.16	1.2	123826	94	-5.335			1
cysteine-glutathione disulfide	BNRXZEPOHPEEAS-UHFFFAOYSA-N	4247235	C(CC(=O)NC(CSSCC(C(=O)O)N)C(=O)NCC(=O)O)C(C(=O)O)N	0.16	1.1	4247235	123	-4.967	Dipeptides	p	1
1-palmitoyl-GPA (16:0)	YNDYKPRNFWPPFU-GOSISDBHSA-N	6419701	CCCCCCCCCCCCCCCC(=O)OC[C@H](COP(=O)(O)O)O	0.16	1.3	6419701	56	5.281	Saturated_Lysophospholipids	m	1
2,3-dihydroxyisovalerate	JTEYKUFKXGDTEU-UHFFFAOYSA-N	677	CC(C)(C(C(=O)O)O)O	0.17	1.1	677	32	-0.846	Butyrates		1
4-methyl-2-oxopentanoate	BKAJNAXTPSGJCU-UHFFFAOYSA-N	70	CC(C)CC(=O)C(=O)O	0.17	0.94	70	110	0.904	Keto Acids		1
isoleucine	AGPKZVBTJJNPAG-WHFBIAKZSA-N	6306	CC[C@H](C)[C@@H](C(=O)O)N	0.18	1	6306	106	-1.6	Amino Acids, Branched-Chain		1
glycerol 3-phosphate	AWUCVROLDVIAJX-UHFFFAOYSA-N	754	C(C(COP(=O)(O)O)O)O	0.18	1.3	754	95	-3.109	Glycerophosphates		1
taurochenodeoxycholate	BHTRKEVKTKCXOH-BJLOMENOSA-N	387316	C[C@H](CCC(=O)NCCS(=O)(=O)O)[C@H]1CC[C@@H]2[C@@]1(CC[C@H]3[C@H]2[C@@H](C[C@H]4[C@@]3(CC[C@H](C4)O)C)O)C	0.18	1	387316	30	4.856	Taurocholic Acid		1
orotate	PXQPEWDEAKTCGB-UHFFFAOYSA-N	967	C1=C(NC(=O)NC1=O)C(=O)O	0.18	1.1	967	129	-1.247	Uracil		1
kynurenate	HCZHHEIFKROPDY-UHFFFAOYSA-N	3845	C1=CC=C2C(=C1)C(=O)C=C(N2)C(=O)O	0.19	0.94	3845	115	0.665	Hydroxyquinolines		1
caffeine	RYYVLZVUVIJVGH-UHFFFAOYSA-N	2519	CN1C=NC2=C1C(=O)N(C(=O)N2C)C	0.19	1	2519	1	-0.495	Xanthines		1
orotidine	FKCRAVPPBFWEJD-XVFCMESISA-N	92751	C1=C(N(C(=O)NC1=O)[C@H]2[C@@H]([C@@H]([C@H](O2)CO)O)O)C(=O)O	0.2	1.1	92751	129	-2.489	Arabinonucleosides		1
isovalerylcarnitine (C5)	IGQBPDJNUXPEMT-UHFFFAOYSA-N	6426851	CC(C)CC(=O)OC(CC(=O)[O-])C[N+](C)(C)C	0.2	1	6426851	61	0.329	Carnitine		1
1-linoleoylglycerol (18:2)	WECGLUPZRHILCT-HZJYTTRNSA-N	5283469	CCCCC/C=C\C/C=C\CCCCCCCC(=O)OCC(CO)O	0.2	1.1	5283469	11	6.805	Glycerides		1
palmitoyl sphingomyelin (d18:1/16:0)	RWKUXQNLWDTSLO-GWQJGLRPSA-N	9939941	CCCCCCCCCCCCCCCC(=O)N[C@@H](COP(=O)([O-])OCC[N+](C)(C)C)[C@@H](/C=C/CCCCCCCCCCCCC)O	0.2	1	9939941	38	12.896	Sphingomyelins		1
1-palmitoleoyl-GPC (16:1)*	LFUDDCMNKWEORN-ZXEGGCGDSA-N	24779461	CCCCCC/C=C\CCCCCCCC(=O)OC[C@H](COP(=O)([O-])OCC[N+](C)(C)C)O	0.2	1	24779461	39	4.946	Unsaturated_Lysophosphatidylcholines		1
theophylline	ZFXYFBGIUFBOJW-UHFFFAOYSA-N	2153	CN1C2=C(C(=O)N(C1=O)C)NC=N2	0.2	1	2153	1	-0.37	Xanthines		1
androstenediol (3beta,17beta) monosulfate (1)	HXJFCUUBVWOORF-LOVVWNRFSA-N	13847309	C[C@]12CC[C@H]3[C@H]([C@@H]1CC[C@@H]2O)CC=C4[C@@]3(CC[C@@H](C4)OS(=O)(=O)O)C	0.21	0.84	13847309	121	2.345	Androstenols		1
benzoate	WPYMKLBDIGXBTP-UHFFFAOYSA-N	243	C1=CC=C(C=C1)C(=O)O	0.21	1.2	243	74	0.982	Benzoates		1
ethylmalonate	UKFXDFUAPNAMPJ-UHFFFAOYSA-N	11756	CCC(C(=O)O)C(=O)O	0.21	1	11756	80	0.484	Malonates		1
N1-Methyl-2-pyridone-5-carboxamide	JLQSXXWTCJPCBC-UHFFFAOYSA-N	69698	CN1C=C(C=CC1=O)C(=O)N	0.21	0.93	69698	13	-1.166	Pyridines		1
glycerophosphorylcholine (GPC)	SUHOQUVVVLNYQR-QMMMGPOBSA-N	71920	C[N+](C)(C)CCOP(=O)([O-])OC[C@H](CO)O	0.21	1.5	71920	95	-2.928	Saturated_Phosphatidylcholines		1
1-palmitoyl-2-docosahexaenoyl-GPC (16:0/22:6)	IESVDEZGAHUQJU-ZLBXKVHBSA-N	6441886	CCCCCCCCCCCCCCCC(=O)OC[C@H](COP(=O)([O-])OCC[N+](C)(C)C)OC(=O)CC/C=C\C/C=C\C/C=C\C/C=C\C/C=C\C/C=C\CC	0.21	0.98	6441886	8	15.115	Unsaturated_Phosphatidylcholines		1
gamma-glutamyl-alpha-lysine	LNLLNTMHVMIMOG-YUMQZZPRSA-N	65254	C(CCN)C[C@@H](C(=O)O)NC(=O)CC[C@@H](C(=O)O)N	0.22	1.1	65254	104	-3.776	Dipeptides		1
N-acetylasparagine	HXFOXFJUNFFYMO-BYPYZUCNSA-N	99715	CC(=O)N[C@@H](CC(=O)N)C(=O)O	0.22	0.89	99715	27	-1.993	Dipeptides		1
2-keto-3-deoxy-gluconate	WPAMZTWLKIDIOP-WVZVXSGGSA-N	161227	C([C@@H]([C@@H](CO)O)O)C(=O)C(=O)O	0.22	1.1	161227	7	-2.649	Sugar Acids		1
androstenediol (3beta,17beta) disulfate (1)	UWPTUYJASNIIJM-LOVVWNRFSA-N	87120982	C[C@]12CC[C@H]3[C@H]([C@@H]1CC[C@@H]2OS(=O)(=O)O)CCC4=C[C@H](CC[C@]34C)OS(=O)(=O)O	0.23	0.84	87120982	121	1.314	Androstenols		1
oxalate (ethanedioate)	MUBZPKHOEPUJKR-UHFFFAOYSA-N	971	C(=O)(C(=O)O)O	0.23	0.89	971	66	-0.688	Dicarboxylic Acids		1
N-acetylaspartate (NAA)	OTCCIMWXFLJLIA-BYPYZUCNSA-N	65065	CC(=O)N[C@@H](CC(=O)O)C(=O)O	0.23	1.1	65065	27	-1.265	Dipeptides		1
glycerophosphoethanolamine	JZNWSCPGTDBMEW-UHFFFAOYSA-N	123874	C(COP(=O)(O)OCC(CO)O)N	0.23	1.1	123874	95	-3.366	Phosphatidylethanolamines		1
mannose	WQZGKKKJIJFFOK-QTVWNMPRSA-N	18950	C([C@@H]1[C@H]([C@@H]([C@@H](C(O1)O)O)O)O)O	0.24	0.94	18950	57	-1.697	Hexoses		1
octadecanedioate	BNJOQKFENDDGSC-UHFFFAOYSA-N	70095	C(CCCCCCCCC(=O)O)CCCCCCCC(=O)O	0.24	0.97	70095	6	6.834	O=FA_20_1		1
caprylate (8:0)	WWZKQHOCKIZLMA-UHFFFAOYSA-N	379	CCCCCCCC(=O)O	0.24	1	379	3	3.018	Saturated FA		1
leucine	ROHFNLRQFUQHCH-YFKPBYRVSA-N	6106	CC(C)C[C@@H](C(=O)O)N	0.25	1	6106	106	-1.389	Amino Acids, Branched-Chain		1
succinylcarnitine (C4-DC)	HAEVNYBCYZZDFL-UHFFFAOYSA-N	71464481	C[N+](C)(C)CC(CC(=O)[O-])OC(=O)CCC(=O)O	0.25	0.93	71464481	14	-1.631	Carnitine		1
4-hydroxyhippurate	ZMHLUFWWWPBTIU-UHFFFAOYSA-N	151012	C1=CC(=CC=C1C(=O)NCC(=O)O)O	0.25	0.88	151012	76	-0.56	Hippurates		1
O-methylcatechol sulfate	AQTYXAPIHMXAAV-UHFFFAOYSA-N	22473	COC1=CC=CC=C1OS(=O)(=O)O	0.25	0.95	22473	52	-0.871	Sulfuric Acids		1
myristoleate (14:1n5)	YWWVWXASSLXJHU-WAYWQWQTSA-N	5281119	CCCC/C=C\CCCCCCCC(=O)O	0.25	1.1	5281119	2	5.916	UnSaturated FA		1
10-nonadecenoate (19:1n9)	BBOWBNGUEWHNQZ-KTKRTIGZSA-N	5312513	CCCCCCCC/C=C\CCCCCCCCC(=O)O	0.25	1.1	5312513	2	8.761	UnSaturated FA		1
5alpha-androstan-3beta,17beta-diol disulfate	CBMYJHIOYJEBSB-YSZCXEEOSA-N	242332	C[C@]12CC[C@@H](C[C@@H]1CC[C@@H]3[C@@H]2CC[C@]4([C@H]3CC[C@@H]4O)C)O	0.26	0.89	242332	10	4.907	Androstanols		1
5-acetylamino-6-amino-3-methyluracil	POQOTWQIYYNXAT-UHFFFAOYSA-N	88299	CC(=O)NC1=C(NC(=O)N(C1=O)C)N	0.26	1.2	88299	5	-1.05	Carnitine		1
2-isopropylmalate	BITYXLXUCSKTJS-UHFFFAOYSA-N	77	CC(C)C(CC(=O)O)(C(=O)O)O	0.26	0.93	77	51	-0.709	Dicarboxylic Acids		1
2-methylbutyrylglycine	HOACIBQKYRHBOW-UHFFFAOYSA-N	193872	CCC(C)C(=O)NCC(=O)O	0.26	0.83	193872	100	0.207	Dipeptides		1
3-carboxy-4-methyl-5-propyl-2-furanpropanoate (CMPF)	WMCQWXZMVIETAO-UHFFFAOYSA-N	123979	CCCC1=C(C(=C(O1)CCC(=O)O)C(=O)O)C	0.26	0.93	123979	89	1.087	Epoxy FA_12	n	1
3-methylglutaconate	WKRBKYFIJPGYQC-DUXPYHPUSA-N	1551553	C/C(=C\C(=O)O)/CC(=O)O	0.26	1	1551553	59	-0.212	Glutarates		1
creatine	CVSVTCORWBXHQV-UHFFFAOYSA-N	586	CN(CC(=O)O)C(=N)N	0.26	1	586	46	-2.404	Guanidines		1
isocitrate	ODBLHEXUDAPZAU-UHFFFAOYSA-N	1198	C(C(C(C(=O)O)O)C(=O)O)C(=O)O	0.26	0.93	1198	51	-2.064	Isocitrates		1
dimethyl sulfoxide (DMSO)	IAZDPXIOMUYVGZ-UHFFFAOYSA-N	679	CS(=O)C	0.26	1.1	679	90	-0.718	Sulfoxides		1
sulfate*	QAOWNCQODCNURD-UHFFFAOYSA-N	1118	OS(=O)(=O)O	0.26	0.93	1118	96	-1.764	Sulfuric Acids		1
5-dodecenoate (12:1n7)	IJBFSOLHRKELLR-FPLPWBNLSA-N	5312378	CCCCCC/C=C\CCCC(=O)O	0.26	1	5312378	22	4.778	UnSaturated FA		1
beta-alanine	UCMIRNVEIXFBKS-UHFFFAOYSA-N	239	C(CN)C(=O)O	0.27	1.1	239	122	-1.026	Amino Acids		1
3-methylglutarylcarnitine (2)	HFCPFJNSBPQJDP-UHFFFAOYSA-N	128145	CC(CC(=O)[O-])CC(=O)OC(CC(=O)O)C[N+](C)(C)C	0.27	0.97	128145	113	-0.765	Glutarates		1
N-formylmethionine	PYUSHNKNPOHWEZ-YFKPBYRVSA-N	439750	CSCC[C@@H](C(=O)O)NC=O	0.27	0.95	439750	73	0.353	Methionine		1
spermidine	ATHGHQPFGPMSJY-UHFFFAOYSA-N	1102	C(CCNCCCN)CN	0.27	1.1	1102	28	-0.654	Putrescine		1
paraxanthine	QUNWUDVFRNGTCO-UHFFFAOYSA-N	4687	CN1C=NC2=C1C(=O)N(C(=O)N2)C	0.27	0.91	4687	1	-0.637	Xanthines		1
bilirubin (Z,Z)	BPYKTIZUTYGOLE-IFADSCNNSA-N	5280352	CC1=C(NC(=C1CCC(=O)O)CC2=C(C(=C(N2)/C=C\3/C(=C(C(=O)N3)C)C=C)C)CCC(=O)O)/C=C\4/C(=C(C(=O)N4)C=C)C	0.28	1	5280352	33	2.167	Bile Pigments	q	1
stachydrine	CMUNUTVVOOHQPW-LURJTMIESA-N	115244	C[N+]1(CCC[C@H]1C(=O)[O-])C	0.28	1	115244	71	-0.618	Imino Acids		1
N6-carbamoylthreonyladenosine	UNUYMBPXEFMLNW-DWVDDHQFSA-N	161466	C[C@H]([C@@H](C(=O)O)NC(=O)NC1=NC=NC2=C1N=CN2[C@H]3[C@@H]([C@@H]([C@H](O3)CO)O)O)O	0.28	0.94	161466	20	-3.42	Purine Nucleosides		1
palmitate (16:0)	IPCSVZSSVZVIGE-UHFFFAOYSA-N	985	CCCCCCCCCCCCCCCC(=O)O	0.28	1	985	3	7.57	Saturated FA		1
mannitol/sorbitol	FBPFZTCFMRRESA-JGWLITMVSA-N	5780	C([C@H]([C@H]([C@@H]([C@H](CO)O)O)O)O)O	0.28	1	5780	49	-3.896	Sugar Alcohols		1
arachidonate (20:4n6)	YZXBAPSDXZZRGB-DOFZRALJSA-N	444899	CCCCC/C=C\C/C=C\C/C=C\C/C=C\CCCC(=O)O	0.28	1.2	444899	22	8.349	UnSaturated FA		1
octanoylcarnitine (C8)	CXTATJFJDMJMIY-UHFFFAOYSA-N	123701	CCCCCCCC(=O)OC(CC(=O)[O-])C[N+](C)(C)C	0.29	1	123701	5	2.097	Carnitine		1
trans-4-hydroxyproline	PMMYEEVYMWASQN-DMTCNVIQSA-N	5810	C1[C@H](CN[C@@H]1C(=O)O)O	0.29	1	5810	50	-0.786	Imino Acids	i	1
androsterone sulfate	ZMITXKRGXGRMKS-HLUDHZFRSA-N	159663	C[C@]12CC[C@H](C[C@@H]1CC[C@@H]3[C@@H]2CC[C@]4([C@H]3CCC4=O)C)OS(=O)(=O)O	0.3	0.89	159663	99	3.003	Cholic Acids		1
fructose	BJHIKXHVCXFQLS-UYFOZJQFSA-N	5984	C([C@H]([C@H]([C@@H](C(=O)CO)O)O)O)O	0.3	0.94	5984	7	-3.839	Hexoses		1
3-methyl-2-oxobutyrate	QHKABHOOEWYVLI-UHFFFAOYSA-N	49	CC(C)C(=O)C(=O)O	0.3	0.95	49	81	0.12	Keto Acids		1
pregnenolone sulfate	DIJBBUIOWGGQOP-QGVNFLHTSA-N	105074	CC(=O)[C@H]1CC[C@@H]2[C@@]1(CC[C@H]3[C@H]2CC=C4[C@@]3(CC[C@@H](C4)OS(=O)(=O)O)C)C	0.3	0.97	105074	21	3.536	Pregnenes		1
1-stearoyl-GPE (18:0)	BBYWOYAFBUOUFP-JOCHJYFZSA-N	9547068	CCCCCCCCCCCCCCCCCC(=O)OC[C@H](COP(=O)(O)OCCN)O	0.3	1.1	9547068	103	6.162	Saturated_Lysophospholipids		1
1-methylurate	QFDRTQONISXGJA-UHFFFAOYSA-N	69726	CN1C(=O)C2=C(NC(=O)N2)NC1=O	0.3	0.87	69726	1	-1.049	Xanthines		1
catechol sulfate	MZPWKJZDOCIALD-UHFFFAOYSA-N	3083879	C1=CC=C(C(=C1)O)OS(=O)(=O)O	0.31	0.87	3083879	52	-0.763	Catechols		1
glutarylcarnitine (C5-DC)	NXJAXUYOQLTISD-UHFFFAOYSA-N	71464488	C[N+](C)(C)CC(CC(=O)[O-])OC(=O)CCCC(=O)O	0.31	0.93	71464488	113	-1.273	Glutarates		1
imidazole lactate	ACZFBYCNAVEFLC-YFKPBYRVSA-N	440129	C1=C(NC=N1)C[C@@H](C(=O)O)O	0.31	1	440129	26	-0.767	Imidazoles		1
pregnanediol-3-glucuronide	ZFFFJLDTCLJDHL-JQYCEVDMSA-N	123796	C[C@@H]([C@H]1CC[C@@H]2[C@@]1(CC[C@H]3[C@H]2CC[C@H]4[C@@]3(CC[C@H](C4)O[C@H]5[C@@H]([C@H]([C@@H]([C@H](O5)C(=O)O)O)O)O)C)C)O	0.31	0.95	123796	105	5.455	Pregnanes		1
N1-methyladenosine	GFYLSDSUCHVORB-IOSLPCCCSA-N	27476	CN1C=NC2=C(C1=N)N=CN2[C@H]3[C@@H]([C@@H]([C@H](O3)CO)O)O	0.31	1	27476	41	-0.596	Purine Nucleosides		1
5-methyluridine (ribothymidine)	DWRXFEITVBNRMK-JXOAFFINSA-N	445408	CC1=CN(C(=O)NC1=O)[C@H]2[C@@H]([C@@H]([C@H](O2)CO)O)O	0.31	0.88	445408	42	-1.936	Pyrimidine Nucleosides		1
N6-acetyllysine	DTERQYGMUDWYAZ-ZETCQYMHSA-N	92832	CC(=O)NCCCC[C@@H](C(=O)O)N	0.32	1.1	92832	86	-2.673	Amino Acids, Diamino		1
cys-gly, oxidized	KDJVKDYFFTWHBO-UHFFFAOYSA-N	333293	C(C(C(=O)NCC(=O)O)N)SSCC(C(=O)NCC(=O)O)N	0.32	1.1	333293	117	-4.968	Dipeptides		1
3-indoxyl sulfate	BXFFHSIDQOFMLE-UHFFFAOYSA-N	10258	C1=CC=C2C(=C1)C(=CN2)OS(=O)(=O)O	0.32	0.91	10258	126	-0.075	Indoles		1
methionine	FFEARJCKVFRZRR-BYPYZUCNSA-N	6137	CSCC[C@@H](C(=O)O)N	0.33	1	6137	107	-1.853	Amino Acids, Sulfur		1
N-acetylglucosamine/N-acetylgalactosamine	OVRNDRQMDRJTHS-FMDGEEDCSA-N	24139	CC(=O)N[C@@H]1[C@H]([C@@H]([C@H](O[C@H]1O)CO)O)O	0.33	0.98	24139	94	-1.488	Glucosamine		1
gulonate*	RGHNJXZEOKUKBD-NRXMZTRTSA-N	9794176	C([C@@H]([C@H]([C@H]([C@H](C(=O)O)O)O)O)O)O	0.33	1.1	9794176	7	-3.739	Sugar Acids		1
2-aminoadipate	OYIFNHCXNCRBQI-UHFFFAOYSA-N	469	C(CC(C(=O)O)N)CC(=O)O	0.34	1.1	469	44	-2.991	Adipates	c	1
3-methoxytyrosine	PFDUUKDQEHURQC-UHFFFAOYSA-N	1670	COC1=C(C=CC(=C1)CC(C(=O)O)N)O	0.34	0.97	1670	93	-2.471	Amino Acids, Aromatic	h	1
N-delta-acetylornithine	SRXKAYJJGAAOBP-UHFFFAOYSA-N	9920500	CC(=O)NCCCC(C(=O)O)N	0.34	0.94	9920500	86	-3.031	Amino Acids, Diamino		1
bilirubin (E,E)*	BPYKTIZUTYGOLE-BMNRKXRESA-N	5315454	CC1=C(NC(=C1CCC(=O)O)CC2=C(C(=C(N2)/C=C/3\C(=C(C(=O)N3)C)C=C)C)CCC(=O)O)/C=C/4\C(=C(C(=O)N4)C=C)C	0.34	1.1	5315454	33	2.167	Bile Pigments	q	1
acetylcarnitine (C2)	RDHQFKQIGNGIED-UHFFFAOYSA-N	1	CC(=O)OC(CC(=O)[O-])C[N+](C)(C)C	0.34	0.92	1	14	-1.001	Carnitine		1
N-acetyl-aspartyl-glutamate (NAAG)	OPVPGKGADVGKTG-UHFFFAOYSA-N	5255	CC(=O)NC(CC(=O)O)C(=O)NC(CCC(=O)O)C(=O)O	0.34	0.88	5255	124	-2.092	Dipeptides		1
5-bromotryptophan	KZDNJQUJBMDHJW-UHFFFAOYSA-N	96735	C1=CC2=C(C=C1Br)C(=CN2)CC(C(=O)O)N	0.34	0.9	96735	12	-1.481	Indoles		1
1-palmitoyl-2-docosahexaenoyl-GPE (16:0/22:6)*	MPWUZHVZZKSTPV-MADBQMNMSA-N	9546799	CCCCCCCCCCCCCCCC(=O)OC[C@H](COP(=O)(O)OCCN)OC(=O)CC/C=C\C/C=C\C/C=C\C/C=C\C/C=C\C/C=C\CC	0.34	1.1	9546799	4	14.677	Phosphatidylethanolamines		1
caprate (10:0)	GHVNFZFCNZKVNT-UHFFFAOYSA-N	2969	CCCCCCCCCC(=O)O	0.34	1	2969	3	4.156	Saturated FA		1
arachidate (20:0)	VKOBVWXKNCXXDE-UHFFFAOYSA-N	10467	CCCCCCCCCCCCCCCCCCCC(=O)O	0.34	1.1	10467	3	9.846	Saturated FA		1
urate	LEHOTFFKMJEONL-UHFFFAOYSA-N	1175	C12=C(NC(=O)N1)NC(=O)NC2=O	0.34	0.94	1175	1	-1.191	Xanthines		1
7-alpha-hydroxy-3-oxo-4-cholestenoate (7-Hoca)	SATGKQGFUDXGAX-MYWFJNCASA-N	3081085	C[C@H](CCCC(C)C(=O)O)[C@H]1CC[C@@H]2[C@@]1(CC[C@H]3[C@H]2[C@@H](CC4=CC(=O)CC[C@]34C)O)C	0.35	0.95	3081085	18	6.337	Cholestenes		1
perfluorooctanesulfonic acid (PFOS)	YFSUTJLHUFNCNZ-UHFFFAOYSA-N	74483	C(C(C(C(C(F)(F)S(=O)(=O)O)(F)F)(F)F)(F)F)(C(C(C(F)(F)F)(F)F)(F)F)(F)F	0.36	0.99	74483	96	6.332	Fluorocarbons		1
ergothioneine	SSISHJJTAXXQAX-UHFFFAOYSA-N	3032311	C[N+](C)(C)C(CC1=CNC(=S)N1)C(=O)[O-]	0.36	0.98	3032311	26	-0.319	Histidine		1
N1-Methyl-4-pyridone-3-carboxamide	KTLRWTOPTKGYQY-UHFFFAOYSA-N	440810	CN1C=CC(=O)C(=C1)C(=O)N	0.36	1.1	440810	13	-0.029	Pyridines		1
sphingomyelin (d18:1/18:1, d18:2/18:0)	NBEADXWAAWCCDG-QDDWGVBQSA-N	6443882	CCCCCCCCCCCCC/C=C/[C@H]([C@H](COP(=O)([O-])OCC[N+](C)(C)C)NC(=O)CCCCCCC/C=C\CCCCCCCC)O	0.36	1	6443882	38	13.518	Sphingomyelins		1
N-stearoyl-sphingosine (d18:1/18:0)*	VODZWWMEJITOND-NXCSZAMKSA-N	5283565	CCCCCCCCCCCCCCCCCC(=O)N[C@@H](CO)[C@@H](/C=C/CCCCCCCCCCCCC)O	0.36	1	5283565	102	15.082	Unsaturated_Ceramides	r	1
7-methylurate	YHNNPKUFPWLTOP-UHFFFAOYSA-N	69160	CN1C2=C(NC(=O)NC2=O)NC1=O	0.36	0.78	69160	1	-1.478	Xanthines		1
1,7-dimethylurate	NOFNCLGCUJJPKU-UHFFFAOYSA-N	91611	CN1C2=C(NC1=O)NC(=O)N(C2=O)C	0.36	0.93	91611	1	-1.336	Xanthines		1
phosphate	NBIIXXVUZAFLBC-UHFFFAOYSA-K	1061	[O-]P(=O)([O-])[O-]	0.37	0.96	1061	96	-2.247			1
N-acetylphenylalanine	CBQJSKKFNMDLON-JTQLQIEISA-N	74839	CC(=O)N[C@@H](CC1=CC=CC=C1)C(=O)O	0.37	0.92	74839	25	0.867	Dipeptides		1
creatinine	DDRJAANPRJIHGJ-UHFFFAOYSA-N	588	CN1CC(=O)N=C1N	0.37	1	588	24	-0.126	Imidazoles	e	1
N-acetyltryptophan	DZTHIGRZJZPRDV-LBPRGKRZSA-N	700653	CC(=O)N[C@@H](CC1=CNC2=CC=CC=C21)C(=O)O	0.37	0.89	700653	12	0.419	Indoles		1
N-palmitoyl-sphinganine (d18:0/16:0)	GCGTXOVNNFGTPQ-JHOUSYSJSA-N	5283572	CCCCCCCCCCCCCCC[C@H]([C@H](CO)NC(=O)CCCCCCCCCCCCCCC)O	0.37	1	5283572	60	14.194	Saturated_Ceramides		1
methylsuccinate	WXUAQHNMJWJLTG-UHFFFAOYSA-N	10349	CC(CC(=O)O)C(=O)O	0.37	1.1	10349	87	-0.417	Succinates		1
taurolithocholate 3-sulfate	HSNPMXROZIQAQD-GBURMNQMSA-N	440071	C[C@H](CCC(=O)NCCS(=O)(=O)O)[C@H]1CC[C@@H]2[C@@]1(CC[C@H]3[C@H]2CC[C@H]4[C@@]3(CC[C@H](C4)OS(=O)(=O)O)C)C	0.37	1	440071	30	5.644	Taurocholic Acid		1
4-acetamidobutanoate	UZTFMUBKZQVKLK-UHFFFAOYSA-N	18189	CC(=O)NCCCC(=O)O	0.38	0.95	18189	53	-0.392	Dipeptides		1
dihomo-linoleate (20:2n6)	XSXIVVZCUAHUJO-HZJYTTRNSA-N	6439848	CCCCC/C=C\C/C=C\CCCCCCCCCC(=O)O	0.38	1.1	6439848	2	9.003	UnSaturated FA		1
1-methylnicotinamide	LDHMAVIPBRSVRG-UHFFFAOYSA-N	10129985	C[N+]1=CC=CC(=C1)C(=N)[O-]	0.39	0.99	10129985	13	1.022			1
glutamine	ZDXPYRJPNDTMRX-VKHMYHEASA-N	5961	C(CC(=O)N)[C@@H](C(=O)O)N	0.39	0.99	5961	82	-4.077	Amino Acids, Basic		1
histidine	HNDVDQJCIGZPNO-YFKPBYRVSA-N	6274	C1=C(NC=N1)C[C@@H](C(=O)O)N	0.39	0.96	6274	26	-3.429	Amino Acids, Cyclic		1
threonate	JPIJQSOTBSSVTP-GBXIJSLDSA-N	151152	C([C@H]([C@@H](C(=O)O)O)O)O	0.39	1	151152	32	-2.395	Butyrates		1
etiocholanolone glucuronide	VFUIRAVTUVCQTF-UHFFFAOYSA-N	270605	CC12CCC(CC1CCC3C2CCC4(C3CCC4=O)C)OC5C(C(C(C(O5)C(=O)O)O)O)O	0.39	0.95	270605	105	3.349	Cholestanols		1
malonate	OFOBLEOULBTSOW-UHFFFAOYSA-N	867	C(C(=O)O)C(=O)O	0.39	0.99	867	80	-0.299	Malonates		1
1-stearoyl-2-docosahexaenoyl-GPE (18:0/22:6)*	XYYHNDVKALDFHQ-OXHZBIAZSA-N	9546798	CCCCCCCCCCCCCCCCCC(=O)OC[C@H](COP(=O)(O)OCCN)OC(=O)CC/C=C\C/C=C\C/C=C\C/C=C\C/C=C\C/C=C\CC	0.39	0.93	9546798	4	15.815	Phosphatidylethanolamines		1
tyrosine	OUYCCCASQSFEME-QMMMGPOBSA-N	6057	C1=CC(=CC=C1C[C@@H](C(=O)O)N)O	0.4	1	6057	111	-2.711	Amino Acids, Aromatic		1			ClusterLabel
glycoursodeoxycholate	GHCZAUBVMUEKKP-XROMFQGDSA-N	12310288	C[C@H](CCC(=O)NCC(=O)O)[C@H]1CC[C@@H]2[C@@]1(CC[C@H]3[C@H]2[C@H](C[C@H]4[C@@]3(CC[C@H](C4)O)C)O)C	0.4	0.9	12310288	15	5.35	Deoxycholic Acid		1
hippurate	QIAFMBKCNZACKA-UHFFFAOYSA-N	464	C1=CC=C(C=C1)C(=O)NCC(=O)O	0.4	0.97	464	125	0.154	Hippurates		1
3-hydroxyhexanoate	HPMGFDVTYHWBAG-UHFFFAOYSA-N	151492	CCCC(CC(=O)O)O	0.4	0.93	151492	16	0.428	OH-FA_8_0_1		1
1-oleoyl-2-linoleoyl-GPE (18:1/18:2)*	GKAFCSRKMWFPSJ-RJXNKANHSA-N	9546753	CCCCCCCC/C=C\CCCCCCCC(=O)OC[C@H](COP(=O)(O)OCCN)OC(=O)CCCCCCC/C=C\C/C=C\CCCCC	0.4	0.94	9546753	4	14.331	Phosphatidylethanolamines		1
pyrraline	VTYFITADLSVOAS-NSHDSACASA-N	122228	C1=C(N(C(=C1)C=O)CCCC[C@@H](C(=O)O)N)CO	0.4	0.82	122228	68	-2.352	Pyrroles		1
eicosenoate (20:1)	BITHHVVYSMSWAG-KTKRTIGZSA-N	5282768	CCCCCCCC/C=C\CCCCCCCCCC(=O)O	0.4	1.2	5282768	2	9.33	UnSaturated FA		1
adrenate (22:4n6)	TWSWSIQAPQLDBP-DOFZRALJSA-N	5497181	CCCCC/C=C\C/C=C\C/C=C\C/C=C\CCCCCC(=O)O	0.4	0.93	5497181	2	9.487	UnSaturated FA		1
trigonelline (N'-methylnicotinate)	WWNNZCOKKKDOPX-UHFFFAOYSA-N	5570	C[N+]1=CC=CC(=C1)C(=O)[O-]	0.41	1	5570	13	0.135	Alkaloids		1
dehydroisoandrosterone sulfate (DHEA-S)	CZWCKYRVOZZJNM-USOAJAOKSA-N	12594	C[C@]12CC[C@H]3[C@H]([C@@H]1CCC2=O)CC=C4[C@@]3(CC[C@@H](C4)OS(=O)(=O)O)C	0.41	0.92	12594	21	1.738	Androstenols		1
gamma-CEHC	VMJQLPNCUPGMNQ-UHFFFAOYSA-N	133098	CC1=C(C=C2CCC(OC2=C1C)(C)CCC(=O)O)O	0.41	0.83	133098	89	1.848	Chromans	n	1
N-acetylvaline	IHYJTAOFMMMOPX-LURJTMIESA-N	66789	CC(C)[C@@H](C(=O)O)NC(=O)C	0.41	0.92	66789	70	0.273	Dipeptides		1
1-methylhistidine	BRMWTNUJHUMWMS-LURJTMIESA-N	92105	CN1C=C(N=C1)C[C@@H](C(=O)O)N	0.41	0.94	92105	58	-2.811	Methylhistidines		1
13-methylmyristate	ZOCYQVNGROEVLU-UHFFFAOYSA-N	151014	CC(C)CCCCCCCCCCCC(=O)O	0.41	1.1	151014	17	6.94	Saturated FA		1			NewCluster_19
glycocholate	RFDAIACWWDREDC-FRVQLJSFSA-N	10140	C[C@H](CCC(=O)NCC(=O)O)[C@H]1CC[C@@H]2[C@@]1([C@H](C[C@H]3[C@H]2[C@@H](C[C@H]4[C@@]3(CC[C@H](C4)O)C)O)O)C	0.42	0.97	10140	15	3.265	Cholic Acids		1			OH-FA_17_3_1
N-formylanthranilic acid	LLLPDUXGHXIXIW-UHFFFAOYSA-N	101399	C1=CC=C(C(=C1)C(=O)O)NC=O	0.42	0.94	101399	85	0.332	ortho-Aminobenzoates		1
3-ureidopropionate	JSJWCHRYRHKBBW-UHFFFAOYSA-N	111	C(CNC(=O)N)C(=O)O	0.42	1.1	111	29	-1.628	Saturated_Lysophosphatidylcholines	a	1
taurocholate	WBWWGRHZICKQGZ-HZAMXZRMSA-N	6675	C[C@H](CCC(=O)NCCS(=O)(=O)O)[C@H]1CC[C@@H]2[C@@]1([C@H](C[C@H]3[C@H]2[C@@H](C[C@H]4[C@@]3(CC[C@H](C4)O)C)O)O)C	0.42	0.97	6675	30	2.771	Taurine		1
3beta,7alpha-dihydroxy-5-cholestenoate	GYJSAWZGYQXRBS-GRJZKGIBSA-N	3081084	C[C@H](CCCC(C)C(=O)O)[C@H]1CC[C@@H]2[C@@]1(CC[C@H]3[C@H]2[C@@H](C=C4[C@@]3(CC[C@@H](C4)O)C)O)C	0.43	0.95	3081084	18	6.61	Cholestenes		1
p-cresol sulfate	WGNAKZGUSRVWRH-UHFFFAOYSA-N	4615423	CC1=CC=C(C=C1)OS(=O)(=O)O	0.43	0.97	4615423	23	-0.508	Cresols		1
2-hydroxyglutarate	HWXBTNAVRSUOJR-UHFFFAOYSA-N	43	C(CC(=O)O)C(C(=O)O)O	0.43	1	43	77	-1.116	Glutarates		1
17alpha-hydroxypregnenolone 3-sulfate	OMOKWYAQVYBHMG-QUPIPBJSSA-N	152971	CC(=O)[C@]1(CC[C@@H]2[C@@]1(CC[C@H]3[C@H]2CC=C4[C@@]3(CCC(C4)OS(=O)(=O)O)C)C)O	0.43	1	152971	21	1.745	Pregnenes		1
myristate (14:0)	TUNFSRHWOTWDNC-UHFFFAOYSA-N	11005	CCCCCCCCCCCCCC(=O)O	0.43	1	11005	3	6.432	Saturated FA		1
cysteinylglycine	ZUKPVRWZDMRIEO-VKHMYHEASA-N	439498	C([C@@H](C(=O)NCC(=O)O)N)S	0.44	1	439498	117	-3.403	Dipeptides		1
N4-acetylcytidine	NIDVTARKFBZMOT-PEBGCTIMSA-N	107461	CC(=O)NC1=NC(=O)N(C=C1)[C@H]2[C@@H]([C@@H]([C@H](O2)CO)O)O	0.44	1.1	107461	40	-2.122	Pyrimidine Nucleosides		1
linoleate (18:2n6)	OYHQOLUKZRVURQ-HZJYTTRNSA-N	5280450	CCCCC/C=C\C/C=C\CCCCCCCC(=O)O	0.44	1	5280450	2	7.865	UnSaturated FA		1
dihomo-linolenate (20:3n3 or n6)	HOBAELRKJCKHQD-QNEBEIHSSA-N	5280581	CCCCC/C=C\C/C=C\C/C=C\CCCCCCC(=O)O	0.44	1.1	5280581	2	8.676	UnSaturated FA		1
S-methylcysteine	IDIDJDIHTAOVLG-VKHMYHEASA-N	24417	CSC[C@@H](C(=O)O)N	0.45	0.94	24417	107	-2.211	Methionine		1
stearate (18:0)	QIQXTHQIDYTFRH-UHFFFAOYSA-N	5281	CCCCCCCCCCCCCCCCCC(=O)O	0.45	1.1	5281	3	8.708	Saturated FA		1
lanthionine	DWPCPZJAHOETAG-IMJSIDKUSA-N	98504	C([C@@H](C(=O)O)N)SC[C@@H](C(=O)O)N	0.45	1.1	98504	84	-3.567	Sulfides		1
10-undecenoate (11:1n1)	FRPZMMHWLSIFAZ-UHFFFAOYSA-M	14891	C=CCCCCCCCCC(=O)[O-]	0.45	1	14891	2	3.878	UnSaturated FA		1
carboxyethyl-GABA	SRGQUICKDUQCKO-UHFFFAOYSA-N	2572	C(CC(=O)O)CNCCC(=O)O	0.46	1	2572	53	-0.738			1
1-linolenoylglycerol (18:3)	XQBHBEXBUZDCRY-FFXVNFNPSA-N	53480978	CCCCC/C=C\C/C=C\C/C=C\CCCCC(=O)OC[C@H](CO)O	0.46	1.1	53480978	35	6.478	Glycerides		1
S-methylcysteine sulfoxide	ZZLHPCSGGOGHFW-UHFFFAOYSA-N	82142	CS(=O)CC(C(=O)O)N	0.46	1	82142	67	-4.24	Methionine		1
trimethylamine N-oxide	UYPYRKYUKCHHIB-UHFFFAOYSA-N	1145	C[N+](C)(C)[O-]	0.46	1	1145	90	-0.618	Methylamines		1
cytidine	UHDGCWIWMRVCDJ-XVFCMESISA-N	6175	C1=CN(C(=O)N=C1N)[C@H]2[C@@H]([C@@H]([C@H](O2)CO)O)O	0.46	1.1	6175	40	-2.193	Pyrimidine Nucleosides		1
biliverdin	RCNSAJSGRJSBKK-YKSNQIBWSA-N	5353439	CC\1=C(/C(=C/C2=C(C(=C(N2)/C=C\3/C(=C(C(=O)N3)C)C=C)C)CCC(=O)O)/N/C1=C/C4=NC(=O)C(=C4C)C=C)CCC(=O)O	0.47	1	5353439	33	2.708	Bile Pigments	q	1
gentisate	WXTMDXOMEHJXQO-UHFFFAOYSA-N	3469	C1=CC(=C(C=C1O)C(=O)O)O	0.47	1.1	3469	74	0.616	Gentisates		1
glucuronate	AEMOLEFTQBMNLQ-WAXACMCWSA-N	444791	[C@@H]1([C@@H]([C@H](O[C@@H]([C@@H]1O)O)C(=O)O)O)O	0.47	1.1	444791	7	-1.54	Hexuronic Acids		1
3-methyl-2-oxovalerate	JVQYSWDUAOAHFM-UHFFFAOYSA-N	47	CCC(C)C(=O)C(=O)O	0.47	0.97	47	110	0.689	Keto Acids		1
2-hydroxynervonate*	UFOOFOUFKSIFCD-KTKRTIGZSA-N	5312783	CCCCCCCC/C=C\CCCCCCCCCCCCC(C(=O)O)O	0.47	0.95	5312783	11	10.631	Oleic Acids		1
2-aminophenol sulfate	VSTZVCJQGSLNLL-UHFFFAOYSA-N	181670	C1=CC=C(C(=C1)N)OS(=O)(=O)O	0.48	0.92	181670	52	-1.174			1
indolelactate	XGILAAMKEQUXLS-UHFFFAOYSA-N	92904	C1=CC=C2C(=C1)C(=CN2)CC(C(=O)O)O	0.48	0.99	92904	47	0.21	Indoles		1
anthranilate	RWZYAGGXGHYGMB-UHFFFAOYSA-N	227	C1=CC=C(C(=C1)C(=O)O)N	0.48	1	227	85	0.497	ortho-Aminobenzoates		1
N-palmitoyl-sphingosine (d18:1/16:0)	YDNKGFDKKRUKPY-TURZORIXSA-N	5283564	CCCCCCCCCCCCCCCC(=O)N[C@@H](CO)[C@@H](/C=C/CCCCCCCCCCCCC)O	0.48	1	5283564	102	13.944	Unsaturated_Ceramides	r	1
cysteine sulfinic acid	ADVPTQAUNPRNPO-UHFFFAOYSA-N	109	C(C(C(=O)O)N)S(=O)O	0.49	1	109	65	-5.235	Butyrates		1
isobutyrylcarnitine (C4)	LRCNOZRCYBNMEP-SECBINFHSA-N	168379	CC(C)C(=O)O[C@H](CC(=O)[O-])C[N+](C)(C)C	0.49	1	168379	61	-0.455	Carnitine		1
homostachydrine*	XULZWQRXYTVUTE-ZETCQYMHSA-N	441447	C[N+]1(CCCC[C@H]1C(=O)[O-])C	0.49	0.99	441447	114	-0.26	Pipecolic Acids		1
alpha-ketoglutarate	KPGXRSRHYNQIFN-UHFFFAOYSA-N	51	C(CC(=O)O)C(=O)C(=O)O	0.5	1	51	127	-1.056	Glutarates		1
ribonate	QXKAIJAYHKCRRA-BXXZVTAOSA-N	5460677	C([C@H]([C@H]([C@H](C(=O)O)O)O)O)O	0.5	0.87	5460677	77	-3.067	Glutarates		1
propionylcarnitine (C3)	UFAHZIUFPNSHSL-UHFFFAOYSA-N	107738	CCC(=O)OC(CC(=O)[O-])C[N+](C)(C)C	0.51	0.96	107738	14	-0.748	Carnitine		1
imidazole propionate	ZCKYOWGFRHAZIQ-UHFFFAOYSA-N	70630	C1=C(NC=N1)CCC(=O)O	0.51	1.1	70630	26	-0.432	Imidazoles		1
4-hydroxychlorothalonil	MDQKYGOECVSPIW-UHFFFAOYSA-N	34217	C(#N)C1=C(C(=C(C(=C1Cl)C#N)Cl)Cl)O	0.51	0.98	34217	23	1.748	Nitriles		1
hyocholate	DKPMWHFRUGMUKF-KWXDGCAGSA-N	92805	C[C@H](CCC(=O)O)[C@H]1CC[C@@H]2[C@@]1(CC[C@H]3[C@H]2[C@@H]([C@@H]([C@H]4[C@@]3(CC[C@H](C4)O)C)O)O)C	0.52	0.92	92805	10	5.366	Cholic Acids		1
epiandrosterone sulfate	ZMITXKRGXGRMKS-LUJOEAJASA-N	9929317	C[C@]12CC[C@@H](C[C@@H]1CC[C@@H]3[C@@H]2CC[C@]4([C@H]3CCC4=O)C)OS(=O)(=O)O	0.52	0.9	9929317	99	3.003	Cholic Acids		1
dimethyl sulfone	HHVIBTZHLRERCL-UHFFFAOYSA-N	6213	CS(=O)(=O)C	0.52	1.1	6213	90	0.09	Dimethyl Sulfoxide		1
1-arachidonoyl-GPE (20:4n6)*	ROPRRXYVXLDXQO-XSQXPFHXSA-N	42607465	CCCCC/C=C\C/C=C\C/C=C\C/C=C\CCCC(=O)OC[C@H](COP(=O)(O)OCCN)O	0.52	1	42607465	62	5.803	Phosphatidylethanolamines		1
uridine	DRTQHJPVMGBUCF-XVFCMESISA-N	6029	C1=CN(C(=O)NC1=O)[C@H]2[C@@H]([C@@H]([C@H](O2)CO)O)O	0.52	0.93	6029	42	-2.117	Pyrimidine Nucleosides		1
docosapentaenoate (n6 DPA; 22:5n6)	AVKOENOBFIYBSA-WMPRHZDHSA-N	6441454	CCCCC/C=C\C/C=C\C/C=C\C/C=C\C/C=C\CCC(=O)O	0.52	1	6441454	108	9.16	UnSaturated FA	o	1
homoarginine	QUOGESRFPZDMMT-YFKPBYRVSA-N	9085	C(CCN=C(N)N)C[C@@H](C(=O)O)N	0.53	0.99	9085	78	-3.227	Amino Acids, Basic		1
2-hydroxyhippurate (salicylurate)	ONJSZLXSECQROL-UHFFFAOYSA-N	10253	C1=CC=C(C(=C1)C(=O)NCC(=O)O)O	0.53	1	10253	76	0.509	Hippurates		1
threonine	AYFVYJQAPQTCCC-GBXIJSLDSA-N	6288	C[C@H]([C@@H](C(=O)O)N)O	0.54	1	6288	88	-3.496	Amino Acids		1
cholesterol	HVYWMOMLDIMFJA-FNOPAARDSA-N	11025495	C[C@H](CCCC(C)C)[C@H]1CC[C@@H]2[C@@]1(CC[C@H]3[C@H]2CC=C4[C@@]3(CCC(C4)O)C)C	0.54	1	11025495	18	10.518	Cholestenes		1
gamma-glutamylalanine	WQXXXVRAFAKQJM-WHFBIAKZSA-N	440103	C[C@@H](C(=O)O)NC(=O)CC[C@@H](C(=O)O)N	0.54	1.1	440103	9	-3.651	Dipeptides		1
2-hydroxy-3-methylvalerate	RILPIWOPNGRASR-UHFFFAOYSA-N	164623	CCC(C)C(C(=O)O)O	0.54	0.93	164623	45	0.633	Pentanoic Acids		1
cortisone	MFYSYFVPBJMHGN-ZPOLXVRWSA-N	222786	C[C@]12CCC(=O)C=C1CC[C@@H]3[C@@H]2C(=O)C[C@]4([C@H]3CC[C@@]4(C(=O)CO)O)C	0.55	0.97	222786	119	0.14	Pregnenes		1
N-stearoyl-sphinganine (d18:0/18:0)*	KZTJQXAANJHSCE-OIDHKYIRSA-N	5283573	CCCCCCCCCCCCCCCCCC(=O)N[C@@H](CO)[C@@H](CCCCCCCCCCCCCCC)O	0.55	0.96	5283573	60	15.332	Saturated_Ceramides		1
decanoylcarnitine (C10)	LZOSYCMHQXPBFU-UHFFFAOYSA-N	10245190	CCCCCCCCCC(=O)OC(CC(=O)[O-])C[N+](C)(C)C	0.56	1	10245190	5	3.235	Carnitine		1
glycodeoxycholate	WVULKSPCQVQLCU-BUXLTGKBSA-N	3035026	C[C@H](CCC(=O)NCC(=O)O)[C@H]1CC[C@@H]2[C@@]1([C@H](C[C@H]3[C@H]2CC[C@H]4[C@@]3(CC[C@H](C4)O)C)O)C	0.56	0.93	3035026	15	4.928	Deoxycholic Acid		1
1-linoleoyl-GPE (18:2)*	DBHKHNGBVGWQJE-USWSLJGRSA-N	52925130	CCCCC/C=C\C/C=C\CCCCCCCC(=O)OC[C@H](COP(=O)(O)OCCN)O	0.56	1	52925130	62	5.319	Phosphatidylethanolamines		1
3-methylcytidine	RDPUKVRQKWBSPK-YYNOVJQHSA-N	159649	CN1C(=N)C=CN(C1=O)[C@@H]2[C@@H]([C@@H]([C@H](O2)CO)O)O	0.56	0.98	159649	40	-1.569	Pyrimidine Nucleosides		1
N-acetylputrescine	KLZGKIDSEJWEDW-UHFFFAOYSA-N	122356	CC(=O)NCCCCN	0.56	1	122356	28	-0.35	Pyrrolidinones		1
1-linoleoyl-GPC (18:2)	SPJFYYJXNPEZDW-UTJQPWESSA-N	11988421	CCCCC/C=C\C/C=C\CCCCCCCC(=O)OCC(COP(=O)([O-])OCC[N+](C)(C)C)O	0.56	1	11988421	39	5.757	Unsaturated_Lysophosphatidylcholines		1
gamma-glutamylisoleucine*	SNCKGJWJABDZHI-UHFFFAOYSA-N	14253342	CCC(C)C(C(=O)O)NC(=O)CCC(C(=O)O)N	0.57	0.87	14253342	64	-2.427	Dipeptides		1
palmitoylcholine	ODYPFMHOOQOHEF-UHFFFAOYSA-N	151731	CCCCCCCCCCCCCCCC(=O)OCC[N+](C)(C)C	0.58	1	151731	5	7.553	Carnitine		1
N-acetylleucine	WXNXCEHXYPACJF-ZETCQYMHSA-N	70912	CC(C)C[C@@H](C(=O)O)NC(=O)C	0.58	0.94	70912	69	1.053	Oligopeptides		1
arabinose	PYMYPHUHKUWMLA-WDCZJNDASA-N	66308	C([C@H]([C@H]([C@@H](C=O)O)O)O)O	0.58	0.67	66308	77	-2.653	Pentoses		1
adenine	GFFGJBXGBJISGV-UHFFFAOYSA-N	190	C1=NC2=C(N1)C(=NC=N2)N	0.58	1.2	190	1	-1.287	Purines		1
gluconate	RGHNJXZEOKUKBD-SQOUGZDYSA-N	10690	C([C@H]([C@H]([C@@H]([C@H](C(=O)O)O)O)O)O)O	0.59	1.1	10690	7	-3.739	Sugar Acids		1
1-stearoyl-2-arachidonoyl-GPC (18:0/20:4)	PSVRFUPOQYJOOZ-QNPWAGBNSA-N	16219824	CCCCCCCCCCCCCCCCCC(=O)OC[C@H](COP(=O)([O-])OCC[N+](C)(C)C)OC(=O)CCC/C=C\C/C=C\C/C=C\C/C=C\CCCCC	0.59	1	16219824	8	15.769	Unsaturated_Phosphatidylcholines		1
O-sulfo-L-tyrosine	CIQHWLTYGMYQQR-QMMMGPOBSA-N	514186	C1=CC(=CC=C1C[C@@H](C(=O)O)N)OS(=O)(=O)O	0.6	0.95	514186	111	-4.557	Amino Acids, Aromatic		1
dimethylarginine (SDMA + ADMA)	YDGMGEXADBMOMJ-LURJTMIESA-N	123831	CN(C)C(=NCCC[C@@H](C(=O)O)N)N	0.6	0.99	123831	78	-2.559	Amino Acids, Basic		1
pantothenate	GHOKWGTUZJEAQD-ZETCQYMHSA-N	6613	CC(C)(CO)[C@H](C(=O)NCCC(=O)O)O	0.6	0.98	6613	134	-1.343	beta-Alanine		1
indolepropionate	GOLXRNDWAUTYKT-UHFFFAOYSA-N	3744	C1=CC=C2C(=C1)C(=CN2)CCC(=O)O	0.6	0.99	3744	12	0.974	Indoles		1
quinolinate	GJAWHXHKYYXBSV-UHFFFAOYSA-N	1066	C1=CC(=C(N=C1)C(=O)O)C(=O)O	0.6	1.1	1066	13	-0.569	Pyridines		1
1,2-dilinoleoyl-GPC (18:2/18:2)	FVXDQWZBHIXIEJ-LNDKUQBDSA-N	5288075	CCCCC/C=C\C/C=C\CCCCCCCC(=O)OC[C@H](COP(=O)([O-])OCC[N+](C)(C)C)OC(=O)CCCCCCC/C=C\C/C=C\CCCCC	0.6	1	5288075	8	14.442	Unsaturated_Phosphatidylcholines		1
2-oxoarginine*	ARBHXJXXVVHMET-UHFFFAOYSA-N	558	C(CC(=O)C(=O)O)CN=C(N)N	0.61	0.94	558	54	-1.292	Guanidines	d	1
5-methylthioadenosine (MTA)	WUUGFSXJNOTRMR-IOSLPCCCSA-N	439176	CSC[C@@H]1[C@H]([C@H]([C@@H](O1)N2C=NC3=C2N=CN=C3N)O)O	0.61	0.96	439176	41	-1.051	Purine Nucleosides		1
1,2-dipalmitoyl-GPC (16:0/16:0)	KILNVBDSWZSGLL-KXQOOQHDSA-N	452110	CCCCCCCCCCCCCCCC(=O)OC[C@H](COP(=O)([O-])OCC[N+](C)(C)C)OC(=O)CCCCCCCCCCCCCCC	0.61	0.99	452110	98	13.852	Saturated_Phosphatidylcholines		1
gamma-glutamylphenylalanine	XHHOHZPNYFQJKL-QWRGUYRKSA-N	111299	C1=CC=C(C=C1)C[C@@H](C(=O)O)NC(=O)CC[C@@H](C(=O)O)N	0.62	0.95	111299	25	-2.402	Dipeptides		1
hydantoin-5-propionic acid	VWFWNXQAMGDPGG-UHFFFAOYSA-N	782	C(CC(=O)O)C1C(=O)NC(=O)N1	0.62	1	782	9	-0.888	Hydantoins		1
pentadecanoate (15:0)	WQEPLUUGTLDZJY-UHFFFAOYSA-N	13849	CCCCCCCCCCCCCCC(=O)O	0.62	1	13849	3	7.001	Saturated FA		1
choline phosphate	YHHSONZFOIEMCP-UHFFFAOYSA-O	1014	C[N+](C)(C)CCOP(=O)(O)O	0.62	0.97	1014	133	-2.066	Trimethyl Ammonium Compounds	g	1
docosahexaenoate (DHA; 22:6n3)	MBMBGCFOFBJSGT-KUBAVDMBSA-N	445580	CC/C=C\C/C=C\C/C=C\C/C=C\C/C=C\C/C=C\CCC(=O)O	0.62	1	445580	108	8.833	UnSaturated FA	o	1
2-methylbutyrylcarnitine (C5)	IHCPDBBYTYJYIL-UHFFFAOYSA-N	6426901	CCC(C)C(=O)OC(CC(=O)[O-])C[N+](C)(C)C	0.63	0.99	6426901	61	0.114	Carnitine		1
betaine	KWIUHFFTVRNATP-UHFFFAOYSA-N	247	C[N+](C)(C)CC(=O)[O-]	0.63	1	247	46	-1.227	Trimethyl Ammonium Compounds		1
1-palmitoyl-2-linoleoyl-GPC (16:0/18:2)	JLPULHDHAOZNQI-ZTIMHPMXSA-N	5287971	CCCCCCCCCCCCCCCC(=O)OC[C@H](COP(=O)([O-])OCC[N+](C)(C)C)OC(=O)CCCCCCC/C=C\C/C=C\CCCCC	0.63	1	5287971	8	14.147	Unsaturated_Phosphatidylcholines		1
3-hydroxylaurate	MUCMKTPAZLSKTL-UHFFFAOYSA-N	94216	CCCCCCCCCC(CC(=O)O)O	0.64	1.1	94216	16	3.842	OH-FA_8_0_1		1
1-stearoyl-2-arachidonoyl-GPE (18:0/20:4)	ANRKEHNWXKCXDB-BHFWLYLHSA-N	5289133	CCCCCCCCCCCCCCCCCC(=O)OC[C@H](COP(=O)(O)OCCN)OC(=O)CCC/C=C\C/C=C\C/C=C\C/C=C\CCCCC	0.64	1	5289133	4	15.331	Phosphatidylethanolamines		1
2-piperidinone	XUWHAWMETYGRKB-UHFFFAOYSA-N	12665	C1CCNC(=O)C1	0.64	0.97	12665	132	0.046	Piperidones	l	1
pyridoxate	HXACOUQIXZGNBF-UHFFFAOYSA-N	6723	CC1=NC=C(C(=C1O)C(=O)O)CO	0.64	0.93	6723	68	-0.835	Pyridines		1
7-methylxanthine	PFWLFWPASULGAN-UHFFFAOYSA-N	68374	CN1C=NC2=C1C(=O)NC(=O)N2	0.64	0.98	68374	1	-0.779	Xanthines		1
homocitrulline	XIGSAGMEBXLVJJ-YFKPBYRVSA-N	65072	C(CCNC(=O)N)C[C@@H](C(=O)O)N	0.65	0.91	65072	118	-3.551	Amino Acids, Diamino		1
N-acetylarginine	SNEIUMQYRCDYCH-LURJTMIESA-N	67427	CC(=O)N[C@@H](CCCN=C(N)N)C(=O)O	0.65	1	67427	86	-3.309	Dipeptides		1
eicosapentaenoate (EPA; 20:5n3)	JAZBEHYOTPTENJ-JLNKQSITSA-N	446284	CC/C=C\C/C=C\C/C=C\C/C=C\C/C=C\CCCC(=O)O	0.65	1.1	446284	22	8.022	UnSaturated FA		1
quinate	AAWZDTNXLSGCEK-LNVDRNJUSA-N	6508	C1[C@H](C([C@@H](CC1(C(=O)O)O)O)O)O	0.66	1	6508	7	-1.979	Acids, Carbocyclic		1
2'-O-methylcytidine	RFCQJGFZUQFYRF-ZOQUXTDFSA-N	150971	CO[C@@H]1[C@@H]([C@H](O[C@H]1N2C=CC(=NC2=O)N)CO)O	0.66	1	150971	40	-2.103	Pyrimidine Nucleosides		1
linolenate [alpha or gamma; (18:3n3 or 6)]	DTOSIQBPPRVQHS-PDBXOOCHSA-N	5280934	CC/C=C\C/C=C\C/C=C\CCCCCCCC(=O)O	0.66	0.95	5280934	2	7.538	UnSaturated FA		1
thyroxine	XUIIKFGFIJCVMT-LBPRGKRZSA-N	5819	C1=C(C=C(C(=C1I)OC2=CC(=C(C(=C2)I)O)I)I)C[C@@H](C(=O)O)N	0.67	1	5819	93	2.306	Amino Acids, Aromatic	h	1
valine	KZSNJWFQEVHDMF-BYPYZUCNSA-N	6287	CC(C)[C@@H](C(=O)O)N	0.67	1	6287	75	-2.169	Amino Acids, Branched-Chain		1
N-acetylthreonine	PEDXUVCGOLSNLQ-WUJLRWPWSA-N	152204	C[C@H]([C@@H](C(=O)O)NC(=O)C)O	0.67	0.94	152204	116	-1.054	Dipeptides		1
3-hydroxyhippurate	XDOFWFNMYJRHEW-UHFFFAOYSA-N	450268	C1=CC(=CC(=C1)O)C(=O)NCC(=O)O	0.67	0.92	450268	76	-0.56	Hippurates		1
C-glycosyltryptophan	CPXSBHKDEPPWIX-RAYCSJGISA-N	10981970	C1=CC=C2C(=C1)C(=C(N2)[C@@H]3[C@H]([C@H]([C@@H]([C@H](O3)CO)O)O)O)C[C@@H](C(=O)O)N	0.67	1	10981970	47	-3.813	Indoles		1
N-acetylmethionine	XUYPXLNMDZIRQH-LURJTMIESA-N	448580	CC(=O)N[C@@H](CCSC)C(=O)O	0.67	1.1	448580	73	0.589	Peptides		1
phenylpyruvate	BTNMPGBKDVTSJY-UHFFFAOYSA-N	997	C1=CC=C(C=C1)CC(=O)C(=O)O	0.67	1	997	72	0.907	Pyruvates		1
stearidonate (18:4n3)	JIWBIWFOSCKQMA-LTKCOYKYSA-N	5312508	CC/C=C\C/C=C\C/C=C\C/C=C\CCCCC(=O)O	0.68	1	5312508	22	7.211	UnSaturated FA		1
ectoine	WQXNXVUDBPYKBA-YFKPBYRVSA-N	126041	CC1=NCC[C@H](N1)C(=O)O	0.69	0.94	126041	27	-0.187	Amino Acids, Diamino		1
N-acetylalanine	KTHDTJVBEPMMGL-VKHMYHEASA-N	88064	C[C@@H](C(=O)O)NC(=O)C	0.7	0.97	88064	120	-0.382	Dipeptides	k	1
1,5-anhydroglucitol (1,5-AG)	MPCAJMNYNOGXPB-SLPGGIOYSA-N	64960	C1[C@@H]([C@H]([C@@H]([C@H](O1)CO)O)O)O	0.7	0.98	64960	57	-1.591	Hexoses		1
2-hydroxypalmitate	JGHSBPIZNUXPLA-UHFFFAOYSA-N	92836	CCCCCCCCCCCCCCC(C(=O)O)O	0.7	0.98	92836	31	6.595	OH-FA_16_0_1		1
3-(4-hydroxyphenyl)lactate	JVGVDSSUAVXRDY-UHFFFAOYSA-N	9378	C1=CC(=CC=C1CC(C(=O)O)O)O	0.7	0.99	9378	48	-0.478	Phenols		1
1-palmitoyl-2-oleoyl-GPC (16:0/18:1)	WTJKGGKOPKCXLL-MRCUWXFGSA-N	6436017	CCCCCCCCCCCCCCCC(=O)OCC(COP(=O)([O-])OCC[N+](C)(C)C)OC(=O)CCCCCCC/C=C\CCCCCCCC	0.7	0.99	6436017	8	14.474	Unsaturated_Phosphatidylcholines		1
isovalerylglycine	ZRQXMKMBBMNNQC-UHFFFAOYSA-N	546304	CC(C)CC(=O)NCC(=O)O	0.71	0.94	546304	100	0.422	Dipeptides		1
tryptophan betaine	AOHCBEAZXHZMOR-ZDUSSCGKSA-N	442106	C[N+](C)(C)[C@@H](CC1=CNC2=CC=CC=C21)C(=O)[O-]	0.71	0.98	442106	12	0.1	Indoles		1
N-acetyltyrosine	CAHKINHBCWCHCF-JTQLQIEISA-N	68310	CC(=O)N[C@@H](CC1=CC=C(C=C1)O)C(=O)O	0.71	1	68310	112	-0.269	Oligopeptides		1
palmitoyl dihydrosphingomyelin (d18:0/16:0)*	QHZIGNLCLJPLCU-QPPIDDCLSA-N	9939965	CCCCCCCCCCCCCCC[C@H]([C@H](COP(=O)([O-])OCC[N+](C)(C)C)NC(=O)CCCCCCCCCCCCCCC)O	0.71	0.99	9939965	60	13.146	Saturated_Ceramides		1
stearoyl sphingomyelin (d18:1/18:0)	LKQLRGMMMAHREN-YJFXYUILSA-N	6453725	CCCCCCCCCCCCCCCCCC(=O)N[C@@H](COP(=O)([O-])OCC[N+](C)(C)C)[C@@H](/C=C/CCCCCCCCCCCCC)O	0.71	1	6453725	38	14.034	Unsaturated_Phosphatidylcholines		1
citrulline	RHGKLRLOHDJJDR-BYPYZUCNSA-N	9750	C(C[C@@H](C(=O)O)N)CNC(=O)N	0.72	0.99	9750	118	-3.909	Amino Acids, Diamino		1
N-acetylglycine	OKJIRPAQVSHGFK-UHFFFAOYSA-N	10972	CC(=O)NCC(=O)O	0.72	0.99	10972	120	-0.908	Dipeptides	k	1
palmitoleate (16:1n7)	SECPZKHBENQXJG-FPLPWBNLSA-N	445638	CCCCCC/C=C\CCCCCCCC(=O)O	0.72	0.99	445638	2	7.054	UnSaturated FA		1
phenyllactate (PLA)	VOXXWSYKYCBWHO-UHFFFAOYSA-N	3848	C1=CC=C(C=C1)CC(C(=O)O)O	0.73	0.99	3848	72	0.658	Pyruvates		1
taurodeoxycholate	AWDRATDZQPNJFN-VAYUFCLWSA-N	2733768	C[C@H](CCC(=O)NCCS(=O)(=O)O)[C@H]1CC[C@@H]2[C@@]1([C@H](C[C@H]3[C@H]2CC[C@H]4[C@@]3(CC[C@H](C4)O)C)O)C	0.73	0.94	2733768	30	4.434	Taurocholic Acid		1
2-aminooctanoate	AKVBCGQVQXPRLD-UHFFFAOYSA-N	69522	CCCCCCC(C(=O)O)N	0.74	1	69522	44	-0.19	Dicarboxylic Acids	c	1
urea	XSQUKJJJFZCRTK-UHFFFAOYSA-N	1176	C(=O)(N)N	0.74	1	1176	28	-1.686	Organic Chemicals		1
succinimide	KZNICNPSHKQLFF-UHFFFAOYSA-N	11439	C1CC(=O)NC1=O	0.74	1	11439	28	-0.97	Pyrrolidinones		1
2-palmitoyl-GPC (16:0)*	NEGQHKSYEYVFTD-HSZRJFAPSA-N	15061532	CCCCCCCCCCCCCCCC(=O)O[C@H](CO)COP(=O)([O-])OCC[N+](C)(C)C	0.74	1	15061532	29	5.462	Saturated_Lysophosphatidylcholines	a	1
N-acetylserine	JJIHLJJYMXLCOY-BYPYZUCNSA-N	65249	CC(=O)N[C@@H](CO)C(=O)O	0.75	1	65249	116	-1.514	Dipeptides		1
dodecanedioate	TVIDDXQYHWJXFK-UHFFFAOYSA-N	12736	C(CCCCCC(=O)O)CCCCC(=O)O	0.75	0.88	12736	6	3.42	O=FA_10_1		1
1-(1-enyl-stearoyl)-2-arachidonoyl-GPE (P-18:0/20:4)*	URPXXNCTXCOATD-FXMFQVEGSA-N	9547058	CCCCCCCCCCCCCCCC/C=C\OC[C@H](COP(=O)(O)OCCN)OC(=O)CCC/C=C\C/C=C\C/C=C\C/C=C\CCCCC	0.75	1	9547058	4	15.869	Phosphatidylethanolamines		1
sphingomyelin (d18:1/14:0, d16:1/16:0)*	KYICBZWZQPCUMO-PSALXKTOSA-N	11433862	CCCCCCCCCCCCC/C=C/[C@H]([C@H](COP(=O)([O-])OCC[N+](C)(C)C)NC(=O)CCCCCCCCCCCCC)O	0.75	1	11433862	38	11.758	Sphingomyelins		1
N-acetylhistidine	KBOJOGQFRVVWBH-ZETCQYMHSA-N	75619	CC(=O)N[C@@H](CC1=CN=CN1)C(=O)O	0.76	1	75619	43	-0.987	Dipeptides		1
gamma-glutamylhistidine	PXVCMZCJAUJLJP-YUMQZZPRSA-N	7017195	C1=C(NC=N1)C[C@@H](C(=O)O)NC(=O)CC[C@@H](C(=O)O)N	0.76	1	7017195	43	-4.256	Dipeptides		1
1-palmitoyl-GPE (16:0)	YVYMBNSKXOXSKW-HXUWFJFHSA-N	9547069	CCCCCCCCCCCCCCCC(=O)OC[C@H](COP(=O)(O)OCCN)O	0.76	1	9547069	103	5.024	Saturated_Lysophospholipids		1
1-(1-enyl-palmitoyl)-2-palmitoyl-GPC (P-16:0/16:0)*	PEWXKAOBUSBJLD-MCBGMKGZSA-N	11146967	CCCCCCCCCCCCCCCC(=O)O[C@H](CO/C=C\CCCCCCCCCCCCCC)COP(=O)([O-])OCC[N+](C)(C)C	0.76	1	11146967	8	14.39	Unsaturated_Phosphatidylcholines		1
indole-3-carboxylic acid	KMAKOBLIOCQGJP-UHFFFAOYSA-N	69867	C1=CC=C2C(=C1)C(=CN2)C(=O)O	0.77	1	69867	47	1.385	Indoles		1
1-methylxanthine	MVOYJPOZRLFTCP-UHFFFAOYSA-N	80220	CN1C(=O)C2=C(NC1=O)N=CN2	0.77	1	80220	1	-0.512	Xanthines		1
methylmalonate (MMA)	ZIYVHBGGAOATLY-UHFFFAOYSA-N	487	CC(C(=O)O)C(=O)O	0.78	1	487	80	-0.085	Malonates		1
deoxycholate	KXGVEGMKQFWNSR-LLQZFEROSA-N	222528	C[C@H](CCC(=O)O)[C@H]1CC[C@@H]2[C@@]1([C@H](C[C@H]3[C@H]2CC[C@H]4[C@@]3(CC[C@H](C4)O)C)O)C	0.79	0.95	222528	10	5.756	Cholic Acids		1
butyrylcarnitine (C4)	QWYFHHGCZUCMBN-UHFFFAOYSA-N	439829	CCCC(=O)OC(CC(=O)[O-])C[N+](C)(C)C	0.8	1	439829	14	-0.179	Carnitine		1
N-methylproline	CWLQUGTUXBXTLF-UHFFFAOYSA-N	557	CN1CCCC1C(=O)O	0.8	0.99	557	71	0.054	Imino Acids		1
15-methylpalmitate	IIUXHTGBZYEGHI-UHFFFAOYSA-M	17903417	CC(C)CCCCCCCCCCCCCC(=O)[O-]	0.8	1	17903417	17	7.597	Saturated FA		1
3-phenylpropionate (hydrocinnamate)	XMIIGOLPHOKFCH-UHFFFAOYSA-N	107	C1=CC=C(C=C1)CCC(=O)O	0.81	1.1	107	72	1.633	Acids, Carbocyclic		1
adipate	WNLRTRBMVRJNCN-UHFFFAOYSA-N	196	C(CCC(=O)O)CC(=O)O	0.81	0.93	196	6	0.006	Adipates		1
gamma-glutamyltyrosine	VVLXCWVSSLFQDS-QWRGUYRKSA-N	94340	C1=CC(=CC=C1C[C@@H](C(=O)O)NC(=O)CC[C@@H](C(=O)O)N)O	0.81	1	94340	112	-3.538	Dipeptides		1
myristoleoylcarnitine (C14:1)*	ABVVZYXTZLEOHP-OLHLWXQYSA-N	90659872	CCCC/C=C\CCCCCCCC(=O)O[C@H](CC(=O)[O-])C[N+](C)(C)C	0.81	1	90659872	19	4.995	NewCluster_19		1
alpha-tocopherol	GVJHHUAWPYXKBD-IEOSBIPESA-N	14985	CC1=C(C(=C2CC[C@@](OC2=C1C)(C)CCC[C@H](C)CCC[C@H](C)CCCC(C)C)C)O	0.81	1	14985	89	10.695	Tocopherols	n	1
docosadienoate (22:2n6)	HVGRZDASOHMCSK-AVQMFFATSA-N	5282807	CCCCC/C=C/C/C=C/CCCCCCCCCCCC(=O)O	0.81	0.99	5282807	2	10.141	UnSaturated FA		1
indoleacetate	SEOVTRFCIGRIMH-UHFFFAOYSA-N	802	C1=CC=C2C(=C1)C(=CN2)CC(=O)O	0.82	1	802	47	0.805	Indoles		1
3-methylhistidine	JDHILDINMRGULE-LURJTMIESA-N	64969	CN1C=NC=C1C[C@@H](C(=O)O)N	0.82	0.84	64969	58	-3.125	Methylhistidines		1
21-hydroxypregnenolone disulfate	CBOVWLYQUCVTFA-WPWXJNKXSA-N	134595	C[C@]12CC[C@H]3[C@H]([C@@H]1CC[C@@H]2C(=O)COS(=O)(=O)O)CC=C4[C@@]3(CC[C@@H](C4)OS(=O)(=O)O)C	0.82	1	134595	21	1.202	Pregnenes		1
3-(3-hydroxyphenyl)propionate	QVWAEZJXDYOKEH-UHFFFAOYSA-N	91	C1=CC(=CC(=C1)O)CCC(=O)O	0.82	0.97	91	48	0.497	Pyruvates		1
1-palmitoyl-2-arachidonoyl-GPC (16:0/20:4n6)	IIZPXYDJLKNOIY-JXPKJXOSSA-N	10747814	CCCCCCCCCCCCCCCC(=O)OC[C@H](COP(=O)([O-])OCC[N+](C)(C)C)OC(=O)CCC/C=C\C/C=C\C/C=C\C/C=C\CCCCC	0.82	0.99	10747814	8	14.631	Unsaturated_Phosphatidylcholines		1
N-methylpipecolate	BPSLZWSRHTULGU-ZCFIWIBFSA-N	11286529	CN1CCCC[C@@H]1C(=O)O	0.83	0.96	11286529	114	0.412	Pipecolic Acids		1
dimethylglycine	FFDGPVCHZBVARC-UHFFFAOYSA-N	673	CN(C)CC(=O)O	0.83	1	673	46	-0.555	Trimethyl Ammonium Compounds		1
N-acetylglutamine	KSMRODHGGIIXDV-YFKPBYRVSA-N	182230	CC(=O)N[C@@H](CCC(=O)N)C(=O)O	0.84	1	182230	9	-1.635	Dipeptides		1
docosadioate	DGXRZJSPDXZJFG-UHFFFAOYSA-N	244872	C(CCCCCCCCCCC(=O)O)CCCCCCCCCC(=O)O	0.84	0.94	244872	6	9.11	O=FA_20_1		1
acisoga	OAUYENAPBFTAQT-UHFFFAOYSA-N	129397	CC(=O)NCCCN1CCCC1=O	0.84	0.99	129397	28	-0.312	Pyrrolidinones		1
5,6-dihydrothymine	NBAKTGXDIBVZOO-UHFFFAOYSA-N	93556	CC1CNC(=O)NC1=O	0.85	0.99	93556	135	-0.867	Barbiturates	b	1
glycolithocholate sulfate*	FHXBAFXQVZOILS-OETIFKLTSA-N	72222	C[C@H](CCC(=O)NCC(=O)O)[C@H]1CC[C@@H]2[C@@]1(CC[C@H]3[C@H]2CC[C@H]4[C@@]3(CC[C@H](C4)OS(=O)(=O)O)C)C	0.85	1	72222	15	6.138	Deoxycholic Acid		1
N-acetyl-1-methylhistidine*	FKTXRTPBUWLETL-QMMMGPOBSA-N	193270	CC(=O)N[C@@H](CC1=CN=CN1C)C(=O)O	0.85	0.97	193270	43	-0.683	Methylhistidines		1
3-aminoisobutyrate	QCHPKSFMDHPSNR-UHFFFAOYSA-N	64956	CC(CN)C(=O)O	0.86	0.99	64956	122	-0.733	Amino Acids		1
kynurenine	YGPSJZOEDVAXAB-QMMMGPOBSA-N	161166	C1=CC=C(C(=C1)C(=O)C[C@@H](C(=O)O)N)N	0.86	1	161166	85	-2.868	Amino Acids		1
2-hydroxystearate	KIHBGTRZFAVZRV-UHFFFAOYSA-N	69417	CCCCCCCCCCCCCCCCC(C(=O)O)O	0.86	1	69417	31	7.733	OH-FA_16_0_1		1
laurate (12:0)	POULHZVOKOAJMA-UHFFFAOYSA-N	3893	CCCCCCCCCCCC(=O)O	0.86	1	3893	3	5.294	Saturated FA		1
3beta-hydroxy-5-cholestenoate	WVXOMPRLWLXFAP-AMQKJUDNSA-N	165511	C[C@H](CCCC(C)C(=O)O)[C@H]1CC[C@@H]2[C@@]1(CC[C@H]3[C@H]2CC=C4[C@@]3(CC[C@@H](C4)O)C)C	0.87	0.93	165511	18	8.429	Androstenols		1
phenol sulfate	CTYRPMDGLDAWRQ-UHFFFAOYSA-N	74426	C1=CC=C(C=C1)OS(=O)(=O)O	0.87	1	74426	52	-0.9	Sulfuric Acids		1
4-vinylphenol sulfate	IETVQHUKTKKBFF-UHFFFAOYSA-N	6426766	C=CC1=CC=C(C=C1)OS(=O)(=O)O	0.88	1	6426766	23	-0.045	Cresols		1
maleate	VZCYOOQTPOCHFL-UPHRSURJSA-N	444266	C(=C\C(=O)O)\C(=O)O	0.88	1	444266	59	-0.416	Dicarboxylic Acids		1
argininate*	BMFMQGXDDJALKQ-BYPYZUCNSA-N	160437	C(C[C@@H](C(=O)O)O)CN=C(N)N	0.88	0.98	160437	54	-1.352	Guanidines	d	1
isovalerate	GWYFCOCPABKNJV-UHFFFAOYSA-N	10430	CC(C)CC(=O)O	0.88	0.97	10430	87	1.25	Pentanoic Acids		1
2'-deoxyuridine	MXHRCPNRJAMMIM-SHYZEUOFSA-N	13712	C1[C@@H]([C@H](O[C@H]1N2C=CC(=O)NC2=O)CO)O	0.88	1	13712	42	-1.516	Pyrimidine Nucleosides		1
phytanate	RLCKHJSFHOZMDR-UHFFFAOYSA-N	26840	CC(C)CCCC(C)CCCC(C)CCCC(C)CC(=O)O	0.88	1.1	26840	17	9.602	Saturated FA		1
17-methylstearate	YETXGSGCWODRAA-UHFFFAOYSA-N	3083779	CC(C)CCCCCCCCCCCCCCCC(=O)O	0.88	1	3083779	17	9.216	Saturated FA		1
guanidinoacetate	BPMFZUMJYQTVII-UHFFFAOYSA-N	763	C(C(=O)O)N=C(N)N	0.89	1	763	92	-3.974			1
2-linoleoylglycerol (18:2)	IEPGNWMPIFDNSD-HZJYTTRNSA-N	5365676	CCCCC/C=C\C/C=C\CCCCCCCC(=O)OC(CO)CO	0.89	1.2	5365676	11	6.805	Glycerides		1
erucate (22:1n9)	DPUOLQHDNGRHBS-KTKRTIGZSA-N	5281116	CCCCCCCC/C=C\CCCCCCCCCCCC(=O)O	0.89	0.98	5281116	2	10.468	UnSaturated FA		1
pyroglutamine*	NPWMTBZSRRLQNJ-UHFFFAOYSA-N	134508	C1CC(=O)NC(=O)C1N	0.9	1	134508	132	-1.014	Dipeptides	l	1
alpha-hydroxyisocaproate	LVRFTAZAXQPQHI-YFKPBYRVSA-N	83697	CC(C)C[C@@H](C(=O)O)O	0.9	1	83697	45	0.844	Pentanoic Acids		1
theobromine	YAPQBXQYLJRXSA-UHFFFAOYSA-N	5429	CN1C=NC2=C1C(=O)NC(=O)N2C	0.9	1	5429	1	-0.637	Xanthines		1
vanillylmandelate (VMA)	CGQCWMIAEPEHNQ-UHFFFAOYSA-N	1245	COC1=C(C=CC(=C1)C(C(=O)O)O)O	0.91	1	1245	48	-0.634	Acids, Carbocyclic		1
N-acetylcarnosine	BKAYIFDRRZZKNF-VIFPVBQESA-N	9903482	CC(=O)NCCC(=O)N[C@@H](CC1=CN=CN1)C(=O)O	0.91	1	9903482	43	-1.657	Dipeptides		1
2-oleoylglycerol (18:1)	UPWGQKDVAURUGE-KTKRTIGZSA-N	5319879	CCCCCCCC/C=C\CCCCCCCC(=O)OC(CO)CO	0.91	1.1	5319879	11	7.132	Glycerides		1
nervonate (24:1n9)*	GWHCXVQVJPWHRF-KTKRTIGZSA-N	5281120	CCCCCCCC/C=C\CCCCCCCCCCCCCC(=O)O	0.91	0.96	5281120	2	11.606	UnSaturated FA		1
4-cholesten-3-one	NYOXRYYXRWJDKP-GYKMGIIDSA-N	91477	C[C@H](CCCC(C)C)[C@H]1CC[C@@H]2[C@@]1(CC[C@H]3[C@H]2CCC4=CC(=O)CC[C@]34C)C	0.92	1	91477	21	10.511	Cholestenes		1
citrate	KRKNYBCHXYNGOX-UHFFFAOYSA-N	311	C(C(=O)O)C(CC(=O)O)(C(=O)O)O	0.92	1	311	51	-2.247	Citrates		1
1-palmitoyl-2-oleoyl-GPE (16:0/18:1)	FHQVHHIBKUMWTI-OTMQOFQLSA-N	5283496	CCCCCCCCCCCCCCCC(=O)OC[C@H](COP(=O)(O)OCCN)OC(=O)CCCCCCC/C=C\CCCCCCCC	0.92	0.96	5283496	4	14.036	Phosphatidylethanolamines		1
10-heptadecenoate (17:1n7)	GDTXICBNEOEPAZ-FPLPWBNLSA-N	5312435	CCCCCC/C=C\CCCCCCCCC(=O)O	0.93	0.95	5312435	2	7.623	UnSaturated FA		1
dopamine 3-O-sulfate	NZKRYJGNYPYXJZ-UHFFFAOYSA-N	122136	C1=CC(=C(C=C1CCN)OS(=O)(=O)O)O	0.94	0.97	122136	23	-1.528	Amino Acids, Aromatic		1
adipoylcarnitine (C6-DC)	BSVHAXJKBCWVDA-UHFFFAOYSA-N	71296139	C[N+](C)(C)CC(CC(=O)[O-])OC(=O)CCCCC(=O)O	0.94	0.98	71296139	109	-0.915	Carnitine	s	1
isoursodeoxycholate	RUDATBOHQWOJDD-DNMBCGTGSA-N	127601	C[C@H](CCC(=O)O)[C@H]1CC[C@@H]2[C@@]1(CC[C@H]3[C@H]2[C@H](C[C@H]4[C@@]3(CC[C@@H](C4)O)C)O)C	0.94	0.92	127601	10	6.178	Cholic Acids		1
2-aminoheptanoate	RDFMDVXONNIGBC-UHFFFAOYSA-N	227939	CCCCCC(C(=O)O)N	0.94	0.99	227939	44	-0.759	Dicarboxylic Acids	c	1
eicosanodioate	JJOJFIHJIRWASH-UHFFFAOYSA-N	75502	C(CCCCCCCCCC(=O)O)CCCCCCCCC(=O)O	0.94	0.94	75502	6	7.972	O=FA_20_1		1
pyridoxal	RADKZDMFGJYCBB-UHFFFAOYSA-N	1050	CC1=NC=C(C(=C1O)C=O)CO	0.94	1	1050	68	-0.754	Pyridines		1
1-myristoyl-2-palmitoyl-GPC (14:0/16:0)	RFVFQQWKPSOBED-PSXMRANNSA-N	129657	CCCCCCCCCCCCCCCC(=O)O[C@H](COC(=O)CCCCCCCCCCCCC)COP(=O)([O-])OCC[N+](C)(C)C	0.94	0.98	129657	98	12.714	Saturated_Phosphatidylcholines		1
glycerophosphoinositol*	BMVUIWJCUQSHLZ-LIPDPKNMSA-N	167572	C(C(COP(=O)(O)OC1[C@H]([C@H](C([C@H]([C@@H]1O)O)O)O)O)O)O	0.95	1	167572	128	-4.407	Inositol Phosphates		1
salicylate	YGSDEFSMJLZEOE-UHFFFAOYSA-N	338	C1=CC=C(C(=C1)C(=O)O)O	0.95	1	338	74	0.908	Salicylates		1
beta-cryptoxanthin	DMASLKHVQRHNES-QQGJMDNJSA-N	6384256	CC1=C(C(CCC1)(C)C)/C=C/C(=C/C=C/C(=C/C=C/C=C(\C)/C=C/C=C(\C)/C=C/C2=C(CC(CC2(C)C)O)C)/C)/C	0.95	1	6384256	131	12.649	Zeaxanthins		1
gamma-glutamyl-epsilon-lysine	JPKNLFVGUZRHOB-YUMQZZPRSA-N	7015685	C(CCNC(=O)CC[C@@H](C(=O)O)N)C[C@@H](C(=O)O)N	0.96	0.97	7015685	104	-3.776	Dipeptides		1
13-HODE + 9-HODE	XBGUTAISSLTGIB-UHFFFAOYSA-N	43013	CC1C(=NOC(=O)NC)SCS1	0.97	1.1	43013	24	1.152		e	1
3-hydroxyisobutyrate	DBXBTMSZEOQQDU-UHFFFAOYSA-N	87	CC(CO)C(=O)O	0.97	0.9	87	79	-0.666	Butyrates		1
cholate	BHQCQFFYRZLCQQ-OELDTZBJSA-N	221493	C[C@H](CCC(=O)O)[C@H]1CC[C@@H]2[C@@]1([C@H](C[C@H]3[C@H]2[C@@H](C[C@H]4[C@@]3(CC[C@H](C4)O)C)O)O)C	0.97	0.88	221493	10	4.093	Cholic Acids		1
1-palmitoyl-2-arachidonoyl-GPE (16:0/20:4)*	DRIVXEVMDWCWLI-CAQMIEAISA-N	9546800	CCCCCCCCCCCCCCCC(=O)OC[C@H](COP(=O)(O)OCCN)OC(=O)CCC/C=C\C/C=C\C/C=C\C/C=C\CCCCC	0.97	1	9546800	4	14.193	Phosphatidylethanolamines		1
pseudouridine	PTJWIQPHWPFNBW-GBNDHIKLSA-N	15047	C1=C(C(=O)NC(=O)N1)[C@H]2[C@@H]([C@@H]([C@H](O2)CO)O)O	0.97	0.99	15047	42	-2.477	Pyrimidine Nucleosides		1
pristanate	PAHGJZDQXIOYTH-UHFFFAOYSA-N	123929	CC(C)CCCC(C)CCCC(C)CCCC(C)C(=O)O	0.97	1	123929	17	8.818	Saturated FA		1
2-aminobutyrate	QWCKQJZIFLGMSD-GSVOUGTGSA-N	439691	CC[C@H](C(=O)O)N	0.98	0.99	439691	75	-2.466	Butyrates		1
1-palmitoyl-2-linoleoyl-GPE (16:0/18:2)	HBZNVZIRJWODIB-NHCUFCNUSA-N	9546747	CCCCCCCCCCCCCCCC(=O)OC[C@H](COP(=O)(O)OCCN)OC(=O)CCCCCCC/C=C\C/C=C\CCCCC	0.98	0.93	9546747	4	13.709	Phosphatidylethanolamines		1
1-oleoyl-GPE (18:1)	PYVRVRFVLRNJLY-MZMPXXGTSA-N	9547071	CCCCCCCC/C=C\CCCCCCCC(=O)OC[C@H](COP(=O)(O)OCCN)O	0.98	0.99	9547071	62	5.646	Phosphatidylethanolamines		1
behenate (22:0)*	UKMSUNONTOPOIO-UHFFFAOYSA-N	8215	CCCCCCCCCCCCCCCCCCCCCC(=O)O	0.98	0.99	8215	3	10.984	Saturated FA		1
alpha-hydroxyisovalerate	NGEWQZIDQIYUNV-UHFFFAOYSA-N	99823	CC(C)C(C(=O)O)O	0.98	1	99823	45	0.064	Valerates		1
trans-urocanate	LOIYMIARKYCTBW-OWOJBTEDSA-N	736715	C1=C(NC=N1)/C=C/C(=O)O	0.99	0.97	736715	26	-0.138	Acrylates		1
N6-carboxymethyllysine	NUXSIDPKKIEIMI-LURJTMIESA-N	123800	C(CCNCC(=O)O)C[C@@H](C(=O)O)N	0.99	0.94	123800	83	-3.177	Pipecolic Acids	f	1
glycochenodeoxycholate	GHCZAUBVMUEKKP-GYPHWSFCSA-N	12544	C[C@H](CCC(=O)NCC(=O)O)[C@H]1CC[C@@H]2[C@@]1(CC[C@H]3[C@H]2[C@@H](C[C@H]4[C@@]3(CC[C@H](C4)O)C)O)C	1	1	12544	15	5.35	Deoxycholic Acid		1
margarate (17:0)	KEMQGTRYUADPNZ-UHFFFAOYSA-N	10465	CCCCCCCCCCCCCCCCC(=O)O	1	1	10465	3	8.139	Saturated FA		1
nonadecanoate (19:0)	ISYWECDDZWTKFF-UHFFFAOYSA-N	12591	CCCCCCCCCCCCCCCCCCC(=O)O	1	1	12591	3	9.277	Saturated FA		1

## Sheet: Cluster ChemRICH
Cluster name	Cluster size	p-values	FDR	Key compound	Altered metabolites	Increased	Decreased	Increased ratio	Altered Ratio
Saturated_Fatty Acids	5	4.5e-08	3.1e-06	stearamide	5	4	1	0.8	1
Ethanolamines	6	2.6e-06	8.7e-05	sphingadienine	4	4	0	1	0.7
Linoleic Acids	4	6.6e-05	0.0015	arachidonoyl ethanolamide	3	3	0	1	0.8
Dipeptides	45	0.00017	0.0029	dihydroorotate	16	15	1	0.9	0.4
OH-FA_17_3_1	4	0.00036	0.0049	12-HHTrE	4	4	0	1	1
Glutamates	3	0.00051	0.0058	glutamate	2	2	0	1	0.7
NewCluster_19	5	0.0017	0.014	oleoylcarnitine (C18:1)	4	4	0	1	0.8
Sugar Alcohols	5	0.0018	0.014	myo-inositol	2	2	0	1	0.4
Purine Nucleosides	9	0.0019	0.014	adenosine	5	1	4	0.2	0.6
Blood Coagulation Factors	3	0.0025	0.017	ADSGEGDFXAEGGGVR*	3	0	3	0	1
Amino Acids, Sulfur	5	0.0037	0.023	3-sulfo-L-alanine	2	2	0	1	0.4
O=FA_10_1	4	0.004	0.023	sebacate (decanedioate)	3	3	0	1	0.8
Glycerides	9	0.0058	0.031	1-arachidonylglycerol (20:4)	5	5	0	1	0.6
Amino Acids, Basic	7	0.012	0.058	ornithine	4	3	1	0.8	0.6
Oleic Acids	4	0.014	0.062	oleoyl ethanolamide	2	2	0	1	0.5
Xanthines	12	0.018	0.075	xanthine	2	1	1	0.5	0.2
OH-FA_8_0_1	6	0.019	0.076	3-hydroxydecanoate	2	2	0	1	0.3
Methionine	5	0.035	0.13	methionine sulfoxide	2	2	0	1	0.4
Succinates	3	0.044	0.16	leucylglycine	2	2	0	1	0.7
Amino Acids	7	0.071	0.24	serine	3	3	0	1	0.4
Carnitine	17	0.084	0.27	palmitoylcarnitine (C16)	5	4	1	0.8	0.3
Dicarboxylic Acids	8	0.087	0.27	fumarate	3	2	1	0.7	0.4
Saturated_Lysophosphatidylcholines	4	0.12	0.35	1-palmitoyl-GPC (16:0)	2	2	0	1	0.5
Butyrates	8	0.13	0.36	alpha-ketobutyrate	3	1	2	0.3	0.4
Acids, Carbocyclic	3	1	1	quinate	0	0	0	#NUM!	0
Adipates	3	1	1	2-hydroxyadipate	0	0	0	#NUM!	0
Amino Acids, Aromatic	7	1	1	phenylalanine	1	1	0	1	0.1
Amino Acids, Branched-Chain	3	1	1	isoleucine	0	0	0	#NUM!	0
Amino Acids, Diamino	6	1	1	N6,N6,N6-trimethyllysine	0	0	0	#NUM!	0
Androstenols	4	1	1	androstenediol (3beta,17beta) monosulfate (1)	0	0	0	#NUM!	0
Bile Pigments	4	1	1	bilirubin (E,Z or Z,E)*	0	0	0	#NUM!	0
Cholestenes	4	1	1	7-alpha-hydroxy-3-oxo-4-cholestenoate (7-Hoca)	0	0	0	#NUM!	0
Cholic Acids	8	1	1	3b-hydroxy-5-cholenoic acid	0	0	0	#NUM!	0
Cresols	3	1	1	o-cresol sulfate	1	1	0	1	0.3
Deoxycholic Acid	5	1	1	ursodeoxycholate	0	0	0	#NUM!	0
Glutarates	8	1	1	3-hydroxy-3-methylglutarate	0	0	0	#NUM!	0
Guanidines	4	1	1	4-guanidinobutanoate	1	1	0	1	0.2
Hexoses	4	1	1	glucose	0	0	0	#NUM!	0
Hippurates	4	1	1	4-hydroxyhippurate	0	0	0	#NUM!	0
Imidazoles	4	1	1	1-methylimidazoleacetate	0	0	0	#NUM!	0
Imino Acids	5	1	1	proline	1	1	0	1	0.2
Indoles	9	1	1	3-indoxyl sulfate	0	0	0	#NUM!	0
Keto Acids	4	1	1	acetoacetate	0	0	0	#NUM!	0
Malonates	3	1	1	ethylmalonate	0	0	0	#NUM!	0
Methylhistidines	3	1	1	1-methylhistidine	0	0	0	#NUM!	0
O=FA_20_1	3	1	1	octadecanedioate	0	0	0	#NUM!	0
OH-FA_16_0_1	3	1	1	9-hydroxystearate	1	1	0	1	0.3
Pentanoic Acids	3	1	1	2-hydroxy-3-methylvalerate	0	0	0	#NUM!	0
Phosphatidylethanolamines	14	1	1	glycerophosphoserine*	1	1	0	1	0.07
Pipecolic Acids	4	1	1	pipecolate	0	0	0	#NUM!	0
Pregnenes	5	1	1	cortisol	0	0	0	#NUM!	0
Pyridines	6	1	1	nicotinamide	1	1	0	1	0.2
Pyrimidine Nucleosides	8	1	1	5-methyluridine (ribothymidine)	0	0	0	#NUM!	0
Pyrrolidinones	4	1	1	5-oxoproline	1	1	0	1	0.2
Pyruvates	5	1	1	pyruvate	1	0	1	0	0.2
Saturated_Ceramides	4	1	1	sphinganine	1	1	0	1	0.2
Saturated FA	16	1	1	caprylate (8:0)	0	0	0	#NUM!	0
Saturated_Lysophospholipids	3	1	1	1-palmitoyl-GPA (16:0)	0	0	0	#NUM!	0
Saturated_Phosphatidylcholines	3	1	1	glycerophosphorylcholine (GPC)	0	0	0	#NUM!	0
Sphingomyelins	3	1	1	palmitoyl sphingomyelin (d18:1/16:0)	0	0	0	#NUM!	0
Sugar Acids	4	1	1	glycerate	1	1	0	1	0.2
Sulfuric Acids	3	1	1	O-methylcatechol sulfate	0	0	0	#NUM!	0
Taurocholic Acid	3	1	1	taurochenodeoxycholate	0	0	0	#NUM!	0
Trimethyl Ammonium Compounds	4	1	1	carnitine	0	0	0	#NUM!	0
UnSaturated FA	21	1	1	mead acid (20:3n9)	0	0	0	#NUM!	0
Unsaturated_Lysophosphatidylcholines	3	1	1	1-oleoyl-GPC (18:1)	0	0	0	#NUM!	0
Unsaturated_Phosphatidylcholines	8	1	1	1-palmitoyl-2-docosahexaenoyl-GPC (16:0/22:6)	0	0	0	#NUM!	0
Valerates	3	1	1	beta-hydroxyisovalerate	1	0	1	0	0.3
