# Supplementary material for: Metabolite Ratios as Quality Indicators for Pre-Analytical Variation in Serum and EDTA Plasma
Source: Metabolites. 2021 Sep 18;11(9):638. doi: 10.3390/metabo11090638 (PMC8465943; doi:10.3390/metabo11090638)
Supplement: Supplementary file 1 [file metabolites-11-00638-s001.zip › Supplemental Data 2 - EDTA-Plasma.xlsx]

## Sheet: Compound Table
Variable	Compound	Superpathway	Subpathway	CHEMSPIDER	KEGG	HMDB	PUBCHEM	p-Value	Rank	q-Value (FDR)	fold change (2 h/0.5 h)	CV
Var_349	arachidonoylcarnitine (C20:4)	Lipid	Fatty Acid Metabolism(Acyl Carnitine)					1.46126e-06	1	0.000923517	1.69576	0.132298
Var_406	dihomo-linolenoylcarnitine (20:3n3 or 6)*	Lipid	Fatty Acid Metabolism(Acyl Carnitine)					5.10411e-06	3	0.00107526	1.63668	0.149996
Var_523	linoleoylcarnitine (C18:2)*	Lipid	Fatty Acid Metabolism(Acyl Carnitine)	4952667		HMDB06469	6450015	1.08334e-05	5	0.00136934	1.43602	0.130811
Var_353	arginine	Amino Acid	Urea cycle; Arginine and Proline Metabolism	227	C00062	HMDB00517	232	9.38899e-06	4	0.00148346	0.671653	0.145089
Var_141	adrenoylcarnitine (C22:4)*	Lipid	Fatty Acid Metabolism(Acyl Carnitine)					4.76686e-06	2	0.00150633	1.72039	0.14731
Var_142	alpha-ketobutyrate	Amino Acid	Methionine, Cysteine, SAM and Taurine Metabolism	2829426	C00109	HMDB00005	58	3.81745e-05	9	0.0026807	0.610728	0.22285
Var_595	oleoylcarnitine (C18:1)	Lipid	Fatty Acid Metabolism(Acyl Carnitine)	21403150		HMDB05065	6441392	3.47368e-05	8	0.00274421	1.31422	0.109778
Var_507	lactate	Carbohydrate	Glycolysis, Gluconeogenesis, and Pyruvate Metabolism	592	C00186	HMDB00190	612	2.75666e-05	6	0.00290368	1.40248	0.131422
Var_156	linoleoyl ethanolamide	Lipid	Endocannabinoid	4446566		HMDB12252	5283446	3.32248e-05	7	0.00299973	1.68553	0.203537
Var_311	5-oxoproline	Amino Acid	Glutathione Metabolism	7127	C01879	HMDB00267	7405	5.87483e-05	10	0.00371289	1.3228	0.115962
Var_408	dihydroorotate	Nucleotide	Pyrimidine Metabolism, Orotate containing	628	C00337	HMDB03349	648	8.68091e-05	12	0.00457195	1.43841	0.143018
Var_597	ornithine	Amino Acid	Urea cycle; Arginine and Proline Metabolism	6026	C00077	HMDB03374	6262	8.41778e-05	11	0.0048364	1.32859	0.117661
Var_407	dihomo-linoleoylcarnitine (C20:2)*	Lipid	Fatty Acid Metabolism(Acyl Carnitine)					0.000182527	16	0.0072098	1.43087	0.158272
Var_440	gamma-glutamylglutamine	Peptide	Gamma-glutamyl Amino Acid	133013	C05283	HMDB11738	150914	0.000182409	15	0.00768552	1.22826	0.103928
Var_642	S-1-pyrroline-5-carboxylate	Amino Acid	Glutamate Metabolism	10140206	C04322	HMDB01301	1196	0.000164048	13	0.00797526	0.683766	0.196804
Var_493	hypoxanthine	Nucleotide	Purine Metabolism, (Hypo)Xanthine/Inosine containing	768	C00262	HMDB00157	790	0.000179462	14	0.00810143	1.77964	0.304259
Var_589	oleoyl ethanolamide	Lipid	Endocannabinoid	4446574		HMDB02088	5283454	0.000256659	17	0.00954167	1.43259	0.175818
Var_149	docosapentaenoylcarnitine (C22:5n3)*	Lipid	Fatty Acid Metabolism(Acyl Carnitine)					0.000347641	18	0.012206	1.70288	0.242986
Var_647	sebacate (decanedioate)	Lipid	Fatty Acid, Dicarboxylate	5004	C08277	HMDB00792	5192	0.000377984	19	0.012573	2.19646	0.412779
Var_607	palmitoyl ethanolamide	Lipid	Endocannabinoid	4509	C16512	HMDB02100	4671	0.000412956	20	0.0130494	1.39424	0.175934
Var_682	stearoyl ethanolamide	Lipid	Endocannabinoid	25958		HMDB13078	27902	0.000539933	21	0.0162494	1.43283	0.215553
Var_531	margaroylcarnitine*	Lipid	Fatty Acid Metabolism(Acyl Carnitine)	35015987		HMDB06210		0.000616847	22	0.0177203	1.13367	0.0795682
Var_260	2-keto-3-deoxy-gluconate	Xenobiotics	Food Component/Plant	141630	C00204	HMDB01353	161227	0.0007294	23	0.0200426	1.32117	0.157771
Var_300	4-hydroxyphenylpyruvate	Amino Acid	Tyrosine Metabolism	954	C01179	HMDB00707	979	0.00138262	24	0.0364089	0.705074	0.218078
Var_519	linolenoylcarnitine (C18:3)*	Lipid	Fatty Acid Metabolism(Acyl Carnitine)					0.00156228	25	0.0394944	1.31992	0.235143
Var_565	N-palmitoyl-heptadecasphingosine (d17:1/16:0)*	Lipid	Sphingolipid Metabolism					0.00208588	26	0.050703	0.875799	0.0927361
Var_323	acetoacetate	Lipid	Ketone Bodies	94	C00164	HMDB00060	96	0.00229486	27	0.0537166	0.813265	0.141495
Var_608	palmitoyl sphingomyelin (d18:1/16:0)	Lipid	Sphingolipid Metabolism	8115562			9939941	0.0032825	28	0.0740908	1.03519	0.0272193
Var_685	stearoylcarnitine (C18)	Lipid	Fatty Acid Metabolism(Acyl Carnitine)	21233653		HMDB00848	6426855	0.00350955	29	0.076484	1.0943	0.0725572
Var_610	palmitoylcarnitine (C16)	Lipid	Fatty Acid Metabolism(Acyl Carnitine)	448	C02990	HMDB00222	461	0.00382675	30	0.0806169	1.15962	0.108409
Var_423	eicosenoylcarnitine (C20:1)*	Lipid	Fatty Acid Metabolism(Acyl Carnitine)					0.00423931	31	0.0864272	1.13432	0.0832762
Var_555	N-acetylputrescine	Amino Acid	Polyamine Metabolism	109095	C02714	HMDB02064	122356	0.00486616	32	0.0961067	0.930903	0.0616913
Var_545	N-acetylarginine	Amino Acid	Urea cycle; Arginine and Proline Metabolism	60752	C02562	HMDB04620	67427	0.0051896	33	0.0993887	0.931448	0.0629725
Var_284	3-methylcytidine	Nucleotide	Pyrimidine Metabolism, Cytidine containing	9164190			159649	0.00550431	34	0.102315	0.818551	0.166702
Var_346	arabonate/xylonate	Carbohydrate	Pentose Metabolism					0.0076763	36	0.134762	1.1302	0.111872
Var_676	sphingosine	Lipid	Sphingolipid Metabolism	4510275	C00319	HMDB00252	5353955	0.00762019	35	0.137599	1.26119	0.280482
Var_222	1-palmitoyl-GPC (16:0)	Lipid	Lysophospholipid	78064		HMDB10382	86554	0.00871723	37	0.1489	1.10143	0.09045
Var_679	stearamide	Lipid	Fatty Acid, Amide	29032	C13846	HMDB34146	31292	0.00904395	38	0.150415	1.53468	0.359735
Var_650	sphingadienine	Lipid	Sphingolipid Metabolism	4952479			6449795	0.00958901	39	0.155391	1.52226	0.33002
Var_529	mannose	Carbohydrate	Fructose, Mannose and Galactose Metabolism	141983	C00159	HMDB00169	18950	0.0106741	40	0.16865	0.898016	0.103903
Var_433	fumarate	Energy	TCA Cycle	10197150	C00122	HMDB00134	444972	0.013044	41	0.201068	1.15584	0.145268
Var_181	1-(1-enyl-palmitoyl)-GPC (P-16:0)*	Lipid	Lysoplasmalogen	9093054		HMDB10407	10917802	0.0133663	42	0.20113	1.16617	0.195629
Var_204	1-oleoyl-GPC (18:1)	Lipid	Lysophospholipid	17240641		HMDB02815	16081932	0.0137391	43	0.201932	1.10505	0.119553
Var_439	gamma-glutamylglutamate	Peptide	Gamma-glutamyl Amino Acid	83831	C05282	HMDB11737	92865	0.0158623	44	0.22784	0.853658	0.180221
Var_574	N1-methylinosine	Nucleotide	Purine Metabolism, (Hypo)Xanthine/Inosine containing	513976		HMDB02721	65095	0.0178385	45	0.250531	1.08776	0.0874084
Var_065	4-imidazoleacetate	Amino Acid	Histidine Metabolism	86856	C02835	HMDB02024	96215	0.0202427	47	0.2722	1.65438	0.42221
Var_393	cys-gly, oxidized	Amino Acid	Glutathione Metabolism	295316			333293	0.0201114	46	0.276313	1.31428	0.298248
Var_454	glucose	Carbohydrate	Glycolysis, Gluconeogenesis, and Pyruvate Metabolism	71358	C00031	HMDB00122	79025	0.02191	48	0.288481	0.928415	0.0782451
Var_432	fructose	Carbohydrate	Fructose, Mannose and Galactose Metabolism	5764	C00095	HMDB00660	5984	0.0241321	49	0.311255	1.28862	0.294047
Var_605	palmitoleoylcarnitine (C16:1)*	Lipid	Fatty Acid Metabolism(Acyl Carnitine)	28639183			71464547	0.0249897	50	0.31587	1.11594	0.124358
Var_658	sphingomyelin (d18:1/18:1, d18:2/18:0)	Lipid	Sphingolipid Metabolism	4947837		HMDB12101	6443882	0.0266522	51	0.330279	1.04089	0.0447323
Var_397	cysteinylglycine	Amino Acid	Glutathione Metabolism	58762	C01419	HMDB00078	439498	0.0294554	56	0.332425	1.32443	0.411248
Var_616	phenylacetylglutamine	Peptide	Acetylated Peptides	270643	C04148	HMDB06344	92258	0.0289346	55	0.332485	0.944524	0.0727827
Var_271	3-hydroxy-3-methylglutarate	Lipid	Mevalonate Metabolism	4573695	C03761	HMDB00355	1662	0.0276653	52	0.33624	0.920481	0.0931689
Var_207	1-palmitoleoyl-GPC (16:1)*	Lipid	Lysophospholipid	21403152		HMDB10383	24779461	0.0288124	54	0.337212	1.13349	0.153174
Var_382	choline	Lipid	Phospholipid Metabolism	149278	C00114	HMDB00097	305	0.0285188	53	0.340073	1.09329	0.1077
Var_077	1-linoleoyl-GPA (18:2)*	Lipid	Lysophospholipid	24766514		HMDB07856		0.031237	57	0.346347	2.94978	1.39256
Var_542	myristoylcarnitine (C14)	Lipid	Fatty Acid Metabolism(Acyl Carnitine)	4932274		HMDB05066	6426854	0.0344096	58	0.374946	1.07791	0.0767421
Var_118	lanthionine	Xenobiotics	Chemical	88959			98504	0.0371071	59	0.397487	0.810647	0.330807
Var_265	2-stearoyl-GPE (18:0)*	Lipid	Lysophospholipid	24769218		HMDB11129		0.0384233	60	0.404725	1.18279	0.22188
Var_196	1-linoleoyl-GPI (18:2)*	Lipid	Lysophospholipid					0.0440946	67	0.415937	1.27435	0.404948
Var_521	linoleoyl-arachidonoyl-glycerol (18:2/20:4) [2]*	Lipid	Diacylglycerol			HMDB07257		0.0404033	61	0.418605	0.81237	0.206781
Var_131	2-hydroxyphenylacetate	Amino Acid	Tyrosine Metabolism	11476	C05852	HMDB00669	11970	0.0450615	68	0.418806	1.16293	0.187156
Var_388	citrulline	Amino Acid	Urea cycle; Arginine and Proline Metabolism	810	C00327	HMDB00904	9750	0.0437646	66	0.419079	0.949922	0.067165
Var_501	isobutyrylcarnitine (C4)	Amino Acid	Leucine, Isoleucine and Valine Metabolism			HMDB00736	168379	0.04583	69	0.419777	0.943834	0.0646888
Var_326	adenine	Nucleotide	Purine Metabolism, Adenine containing	185	C00147	HMDB00034	190	0.0437386	65	0.425274	0.591454	0.435065
Var_347	arachidate (20:0)	Lipid	Long Chain Fatty Acid	10035	C06425	HMDB02212	10467	0.048167	71	0.428754	1.16842	0.184899
Var_489	homoarginine	Amino Acid	Urea cycle; Arginine and Proline Metabolism	8732	C01924	HMDB00670	9085	0.048856	72	0.428847	0.915888	0.121037
Var_170	1,2-dipalmitoyl-GPC (16:0/16:0)	Lipid	Phosphatidylcholine (PC)	398235	D03585	HMDB00564	452110	0.0437306	64	0.43184	0.947799	0.0695752
Var_248	2-aminobutyrate	Amino Acid	Glutathione Metabolism	388757	C02261	HMDB00650	439691	0.0500245	73	0.433089	0.967818	0.0428428
Var_651	sphinganine	Lipid	Sphingolipid Metabolism	3014	C00836	HMDB00269	3126	0.0548219	80	0.433093	1.20176	0.262052
Var_272	3-hydroxybutyrate (BHBA)	Lipid	Ketone Bodies	428	C01089	HMDB00357	441	0.0541728	79	0.433382	0.933795	0.112111
Var_500	inosine	Nucleotide	Purine Metabolism, (Hypo)Xanthine/Inosine containing	21241953	C00294	HMDB00195	6021	0.0521355	76	0.433548	2.00154	1.57294
Var_169	1,2-dilinoleoyl-GPC (18:2/18:2)	Lipid	Phosphatidylcholine (PC)	4450312		HMDB08138	5288075	0.0480856	70	0.434144	1.06402	0.0990455
Var_655	sphingomyelin (d18:0/20:0, d16:0/22:0)*	Lipid	Sphingolipid Metabolism					0.04261	62	0.434347	0.916836	0.10171
Var_573	N1-methyladenosine	Nucleotide	Purine Metabolism, Adenine containing	4573813	C02494	HMDB03331	27476	0.0536295	78	0.434536	0.92156	0.115115
Var_234	1-stearoyl-GPC (18:0)	Lipid	Lysophospholipid	435389		HMDB10384	497299	0.0433905	63	0.435282	1.08652	0.114043
Var_173	1-(1-enyl-palmitoyl)-2-arachidonoyl-GPC (P-16:0/20:4)*	Lipid	Plasmalogen	24767495		HMDB11220		0.0517423	75	0.436015	1.04614	0.0576353
Var_456	glutamate	Amino Acid	Glutamate Metabolism	591	C00025	HMDB00148	611	0.0511109	74	0.436515	1.13985	0.226326
Var_677	sphingosine 1-phosphate	Lipid	Sphingolipid Metabolism	4446673	C06124	HMDB00277	5283560	0.053511	77	0.439207	1.95981	0.970764
Var_409	dimethylarginine (SDMA + ADMA)	Amino Acid	Urea cycle; Arginine and Proline Metabolism	110375	C03626	HMDB01539	123831	0.057	81	0.444741	0.837485	0.253769
Var_680	stearate (18:0)	Lipid	Long Chain Fatty Acid	5091	C01530	HMDB00827	5281	0.0592123	82	0.456368	1.10924	0.162058
Var_268	3-aminoisobutyrate	Nucleotide	Pyrimidine Metabolism, Thymine containing	58481	C05145	HMDB03911	64956	0.0607263	84	0.456893	0.942837	0.0879147
Var_704	trimethylamine N-oxide	Lipid	Phospholipid Metabolism	1113	C01104	HMDB00925	1145	0.0601032	83	0.457653	0.958883	0.136836
Var_237	10-heptadecenoate (17:1n7)	Lipid	Long Chain Fatty Acid	4471860		HMDB60038	5312435	0.0632649	86	0.464923	0.832082	0.310981
Var_395	cysteine s-sulfate	Amino Acid	Methionine, Cysteine, SAM and Taurine Metabolism	102939	C05824	HMDB00731	115015	0.0647574	88	0.465076	1.14361	0.182923
Var_558	N-acetylthreonine	Amino Acid	Glycine, Serine and Threonine Metabolism	3841173			152204	0.0670035	91	0.465343	0.923175	0.124276
Var_445	gamma-glutamylmethionine	Peptide	Gamma-glutamyl Amino Acid	5373147		HMDB29155	7009567	0.0625954	85	0.465415	1.07722	0.114437
Var_459	glutarylcarnitine (C5-DC)	Amino Acid	Lysine Metabolism	21403175		HMDB13130	71464488	0.0663171	90	0.465693	0.844807	0.196006
Var_191	1-linolenoyl-GPC (18:3)*	Lipid	Lysophospholipid			HMDB10388		0.0642329	87	0.466611	1.06414	0.167022
Var_637	pyruvate	Carbohydrate	Glycolysis, Gluconeogenesis, and Pyruvate Metabolism	96901	C00022	HMDB00243	1060	0.0661831	89	0.469974	0.838443	0.227581
Var_415	docosapentaenoate (n3 DPA; 22:5n3)	Lipid	Polyunsaturated Fatty Acid (n3 and n6)		C16513	HMDB06528	6441454	0.069905	94	0.47	0.835117	0.452167
Var_128	1-palmitoyl-GPI (16:0)	Lipid	Lysophospholipid			HMDB61695		0.0695165	93	0.472413	1.4329	0.4721
Var_270	3-hydroxy-2-ethylpropionate	Amino Acid	Leucine, Isoleucine and Valine Metabolism	164207		HMDB00396	188979	0.071088	95	0.472922	0.831992	0.218547
Var_189	1-arachidonoyl-GPI (20:4)*	Lipid	Lysophospholipid			HMDB61690		0.0694848	92	0.47733	1.1913	0.301542
Var_160	oleoyl-arachidonoyl-glycerol (18:1/20:4) [2]*	Lipid	Diacylglycerol			HMDB07228		0.0758621	99	0.484291	0.947592	0.0669649
Var_543	N-acetyl-beta-alanine	Nucleotide	Pyrimidine Metabolism, Uracil containing	68881	C01073		76406	0.0754075	98	0.486301	0.865461	0.281724
Var_356	behenate (22:0)*	Lipid	Long Chain Fatty Acid	7923	C08281	HMDB00944	8215	0.0747502	97	0.487032	1.10575	0.165489
Var_197	1-linoleoylglycerol (18:2)	Lipid	Monoacylglycerol	4446589			5283469	0.0744847	96	0.490357	1.78022	0.909204
Var_114	docosahexaenoylcarnitine (C22:6)*	Lipid	Fatty Acid Metabolism(Acyl Carnitine)					0.077859	100	0.492069	1.24858	0.29402
Var_087	N-formylphenylalanine	Amino Acid	Tyrosine Metabolism	663938			759256	0.0790053	101	0.49437	0.641348	0.552803
Var_604	palmitoleate (16:1n7)	Lipid	Long Chain Fatty Acid	393216	C08362	HMDB03229	445638	0.0822781	102	0.509802	0.817923	0.347831
Var_476	glycosyl-N-(2-hydroxynervonoyl)-sphingosine (d18:1/24:1(2OH))*	Lipid	Ceramides					0.0880795	103	0.540449	1.08817	0.151654
Var_094	adenosine 3',5'-cyclic monophosphate (cAMP)	Nucleotide	Purine Metabolism, Adenine containing	268	C00575	HMDB00058	6076	0.0897268	104	0.545263	0.799239	0.234633
Var_089	(N(1) + N(8))-acetylspermidine	Amino Acid	Polyamine Metabolism					0.0909748	105	0.547582	0.804818	0.409233
Var_090	1-oleoyl-GPI (18:1)*	Lipid	Lysophospholipid					0.0943025	107	0.557002	1.17757	0.305378
Var_281	3-methoxytyrosine	Amino Acid	Tyrosine Metabolism	8948		HMDB01434	1670	0.0935663	106	0.557867	0.944347	0.0983474
Var_145	carotene diol (3)	Cofactors and Vitamins	Vitamin A Metabolism					0.0964859	108	0.564621	0.920482	0.212399
Var_224	1-stearoyl-2-arachidonoyl-GPC (18:0/20:4)	Lipid	Phosphatidylcholine (PC)	17347139		HMDB08048	16219824	0.0974985	109	0.565312	0.985643	0.0233015
Var_577	N6,N6,N6-trimethyllysine	Amino Acid	Lysine Metabolism	140379	C03793	HMDB01325	440120	0.0997376	110	0.573038	0.852894	0.263756
Var_093	12,13-DiHOME	Lipid	Fatty Acid, Dihydroxy	8412123	C14829	HMDB04705	10236635	0.101457	111	0.577668	1.52959	0.637301
Var_366	butyrylcarnitine (C4)	Lipid	Fatty Acid Metabolism (also BCAA Metabolism)	184820	C02862	HMDB02013	439829	0.103492	112	0.583993	0.85858	0.186251
Var_148	dihomo-linolenoyl-choline	Lipid	Fatty Acid Metabolism (Acyl Choline)					0.106864	113	0.59768	1.60402	1.04659
Var_363	bilirubin (E,Z or Z,E)*	Cofactors and Vitamins	Hemoglobin and Porphyrin Metabolism	4705847		HMDB00488	5799469	0.108223	114	0.599975	1.14794	0.218737
Var_217	1-palmitoyl-2-oleoyl-GPC (16:0/18:1)	Lipid	Phosphatidylcholine (PC)	4940699		HMDB07972	6436017	0.114693	119	0.609124	0.96513	0.0669271
Var_551	N-acetylleucine	Amino Acid	Leucine, Isoleucine and Valine Metabolism	64075	C02710	HMDB11756	70912	0.11096	115	0.609797	0.803023	0.338195
Var_223	1-palmitoyl-GPE (16:0)	Lipid	Lysophospholipid	7826019		HMDB11503	9547069	0.117972	122	0.611134	1.13651	0.207128
Var_517	linoleate (18:2n6)	Lipid	Polyunsaturated Fatty Acid (n3 and n6)	4444105	C01595	HMDB00673	5280450	0.114221	118	0.61176	0.909584	0.267955
Var_712	xanthine	Nucleotide	Purine Metabolism, (Hypo)Xanthine/Inosine containing	1151	C00385	HMDB00292	1188	0.116216	120	0.612072	1.38649	0.64877
Var_491	homostachydrine*	Xenobiotics	Food Component/Plant	390180	C08283	HMDB33433	441447	0.113444	117	0.612792	0.954506	0.0621982
Var_259	2-hydroxystearate	Lipid	Fatty Acid, Monohydroxy	62625	C03045		69417	0.112542	116	0.613158	1.14962	0.18985
Var_414	docosahexaenoylcholine	Lipid	Fatty Acid Metabolism (Acyl Choline)					0.117509	121	0.613767	1.53694	0.827172
Var_596	oleoylcholine	Lipid	Fatty Acid Metabolism (Acyl Choline)					0.130241	134	0.61427	1.434	1.08354
Var_495	imidazole propionate	Amino Acid	Histidine Metabolism	63798		HMDB02271	70630	0.119604	123	0.614548	0.914641	0.197935
Var_263	2-palmitoyl-GPC (16:0)*	Lipid	Lysophospholipid	21403165		HMDB61702	15061532	0.129483	133	0.615286	1.14179	0.235844
Var_294	4-cholesten-3-one	Lipid	Sterol	427	C00599	HMDB00921	91477	0.127986	131	0.61746	1.14247	0.275377
Var_645	salicylate	Xenobiotics	Drug	331	C00805	HMDB01895	338	0.129173	132	0.618467	0.937178	0.196116
Var_255	2-hydroxyglutarate	Lipid	Fatty Acid, Dicarboxylate	42	C02630	HMDB00606	43	0.132122	135	0.618528	1.19756	0.261071
Var_646	sarcosine	Amino Acid	Glycine, Serine and Threonine Metabolism	1057	C00213	HMDB00271	1088	0.133511	136	0.620434	0.932621	0.130838
Var_653	sphingomyelin (d17:2/16:0, d18:2/15:0)*	Lipid	Sphingolipid Metabolism					0.127687	130	0.620757	0.940403	0.109359
Var_350	arachidonoylcholine	Lipid	Fatty Acid Metabolism (Acyl Choline)					0.13505	137	0.623003	1.4516	1.04958
Var_357	behenoyl dihydrosphingomyelin (d18:0/22:0)*	Lipid	Sphingolipid Metabolism	24846880		HMDB12091		0.141223	143	0.624146	0.941488	0.1092
Var_297	4-hydroxy-2-oxoglutaric acid	Lipid	Fatty Acid, Dicarboxylate	579	C01127	HMDB02070	599	0.127483	129	0.62457	0.815713	0.335335
Var_175	1-(1-enyl-palmitoyl)-2-linoleoyl-GPC (P-16:0/18:2)*	Lipid	Plasmalogen	24767486		HMDB11211		0.140768	142	0.626515	1.05622	0.13139
Var_635	pyridoxate	Cofactors and Vitamins	Vitamin B6 Metabolism	6467	C00847	HMDB00017	6723	0.138066	139	0.627753	1.20478	0.378229
Var_485	hexadecadienoate (16:2n6)	Lipid	Polyunsaturated Fatty Acid (n3 and n6)	13628094		HMDB00477		0.137074	138	0.627757	0.864649	0.387849
Var_478	glycosyl-N-nervonoyl-sphingosine (d18:1/24:1)*	Lipid	Ceramides					0.127305	128	0.628568	0.958842	0.0733974
Var_502	isoleucine	Amino Acid	Leucine, Isoleucine and Valine Metabolism	769	C00407	HMDB00172	6306	0.140287	141	0.628802	0.974856	0.0445993
Var_686	stearoylcholine*	Lipid	Fatty Acid Metabolism (Acyl Choline)					0.126387	127	0.628949	1.47837	1.09397
Var_631	proline	Amino Acid	Urea cycle; Arginine and Proline Metabolism	128566	C00148	HMDB00162	145742	0.139525	140	0.629854	1.02839	0.0511459
Var_524	linoleoylcholine*	Lipid	Fatty Acid Metabolism (Acyl Choline)					0.123746	124	0.630705	1.52392	1.05664
Var_327	adenosine 5'-monophosphate (AMP)	Nucleotide	Purine Metabolism, Adenine containing	10239183	C00020	HMDB00045	6083	0.12624	126	0.633201	1.31007	0.427421
Var_511	laurate (12:0)	Lipid	Medium Chain Fatty Acid	3756	C02679	HMDB00638	3893	0.146316	146	0.63337	1.05817	0.0988674
Var_623	pipecolate	Amino Acid	Lysine Metabolism	826	C00408	HMDB00070	849	0.144615	144	0.6347	0.98194	0.0424073
Var_236	1-stearoyl-GPI (18:0)	Lipid	Lysophospholipid	21403067		HMDB61696		0.125567	125	0.634867	1.26139	0.557335
Var_611	palmitoylcholine	Lipid	Fatty Acid Metabolism (Acyl Choline)	133731			151731	0.146222	145	0.637324	1.46937	1.06759
Var_422	eicosenoate (20:1)	Lipid	Long Chain Fatty Acid	4445895	C16526	HMDB02231	5282768	0.150057	147	0.645145	1.19061	0.334145
Var_233	1-stearoyl-2-oleoyl-GPG (18:0/18:1)	Lipid	Phosphatidylglycerol (PG)					0.154523	149	0.655428	0.902493	0.276412
Var_701	trans-urocanate	Amino Acid	Histidine Metabolism	643824	C00785	HMDB00301	736715	0.153898	148	0.657188	0.872391	0.352062
Var_667	sphingomyelin (d18:1/25:0, d19:0/24:1, d20:1/23:0, d19:1/24:0)*	Lipid	Sphingolipid Metabolism	24846885				0.158378	152	0.658519	1.06339	0.109405
Var_241	13-methylmyristate	Lipid	Fatty Acid, Branched	133106			151014	0.159588	153	0.659213	0.827649	0.37826
Var_370	caprylate (8:0)	Lipid	Medium Chain Fatty Acid	370	C06423	HMDB00482	379	0.15823	151	0.662262	1.04497	0.13622
Var_468	glycocholenate sulfate*	Lipid	Secondary Bile Acid Metabolism					0.157701	150	0.664448	1.05135	0.133669
Var_452	gentisate	Amino Acid	Tyrosine Metabolism	3350	C00628	HMDB00152	3469	0.162861	154	0.668363	1.11077	0.269921
Var_091	1-palmitoylglycerol (16:0)	Lipid	Monoacylglycerol	14201		HMDB31074	14900	0.163978	155	0.668609	1.64176	1.11796
Var_662	sphingomyelin (d18:1/20:2, d18:2/20:1, d16:1/22:2)*	Lipid	Sphingolipid Metabolism					0.169252	158	0.677009	1.12907	0.283336
Var_561	N-delta-acetylornithine	Amino Acid	Urea cycle; Arginine and Proline Metabolism	8096135			9920500	0.201823	188	0.678468	1.00691	0.254891
Var_435	gamma-carboxyglutamate	Amino Acid	Glutamate Metabolism	37241		HMDB41900	40772	0.197864	184	0.679618	0.920704	0.207138
Var_606	palmitoyl dihydrosphingomyelin (d18:0/16:0)*	Lipid	Sphingolipid Metabolism	8115586			9939965	0.193593	180	0.679725	1.03911	0.115678
Var_532	methionine	Amino Acid	Methionine, Cysteine, SAM and Taurine Metabolism	5907	C00073	HMDB00696	6137	0.168881	157	0.679827	0.975073	0.0479176
Var_691	tartronate (hydroxymalonate)	Xenobiotics	Bacterial/Fungal	44	C02287	HMDB35227	45	0.196144	182	0.681114	0.913296	0.250043
Var_132	3-(3-hydroxyphenyl)propionate	Xenobiotics	Benzoate Metabolism	89	C11457	HMDB00375	91	0.193121	179	0.681858	1.07229	0.204916
Var_227	1-stearoyl-2-docosahexaenoyl-GPC (18:0/22:6)	Lipid	Phosphatidylcholine (PC)			HMDB08057		0.201804	187	0.682033	1.03821	0.0824746
Var_417	dodecanedioate	Lipid	Fatty Acid, Dicarboxylate	12213	C02678	HMDB00623	12736	0.197603	183	0.682433	0.808585	0.535874
Var_365	biliverdin	Cofactors and Vitamins	Hemoglobin and Porphyrin Metabolism	10628548	C00500	HMDB01008	5353439	0.201035	186	0.683088	0.921188	0.183939
Var_656	sphingomyelin (d18:1/14:0, d16:1/16:0)*	Lipid	Sphingolipid Metabolism	9608732		HMDB12097	11433862	0.175099	162	0.6831	0.959343	0.0787458
Var_351	arachidoylcarnitine (C20)*	Lipid	Fatty Acid Metabolism(Acyl Carnitine)	28639199		HMDB06460		0.200103	185	0.683595	1.06627	0.164347
Var_084	indole-3-carboxylic acid	Amino Acid	Tryptophan Metabolism		C19837	HMDB03320	69867	0.168815	156	0.683916	1.14403	0.359915
Var_291	3beta-hydroxy-5-cholestenoate	Lipid	Sterol		C17333		165511	0.19266	178	0.684051	0.903978	0.355883
Var_371	carnitine	Lipid	Carnitine Metabolism	10455	C00318	HMDB00062	10917	0.195992	181	0.684349	0.977007	0.0521639
Var_254	2-hydroxydecanoate	Lipid	Fatty Acid, Monohydroxy	20195			21488	0.17224	159	0.684627	0.946324	0.0905936
Var_127	1-oleoylglycerol (18:1)	Lipid	Monoacylglycerol	4446588		HMDB11567	5283468	0.173424	160	0.685026	1.36463	0.522201
Var_147	cystathionine	Amino Acid	Methionine, Cysteine, SAM and Taurine Metabolism	811	C02291	HMDB00099	439258	0.190938	176	0.685642	0.870514	0.206319
Var_518	linolenate [alpha or gamma; (18:3n3 or 6)]	Lipid	Polyunsaturated Fatty Acid (n3 and n6)	4444437	C06426	HMDB03073	5280934	0.19003	175	0.686282	0.988346	0.344285
Var_657	sphingomyelin (d18:1/17:0, d17:1/18:0, d19:1/16:0)	Lipid	Sphingolipid Metabolism					0.192388	177	0.686946	1.06246	0.147242
Var_306	5-acetylamino-6-formylamino-3-methyluracil	Xenobiotics	Xanthine Metabolism	97287	C16365	HMDB11105	108214	0.175029	161	0.687069	0.73501	0.338112
Var_586	octanoylcarnitine (C8)	Lipid	Fatty Acid Metabolism(Acyl Carnitine)	110274	C02838	HMDB00791	123701	0.183265	168	0.689427	1.0129	0.0577066
Var_613	pentadecanoate (15:0)	Lipid	Long Chain Fatty Acid	13249	C16537	HMDB00826	13849	0.179081	164	0.690117	0.919227	0.22126
Var_153	homocitrulline	Amino Acid	Urea cycle; Arginine and Proline Metabolism	58582	C02427	HMDB00679	65072	0.178007	163	0.690186	0.823836	0.438954
Var_201	1-myristoyl-2-arachidonoyl-GPC (14:0/20:4)*	Lipid	Phosphatidylcholine (PC)	24766559		HMDB07883		0.19002	174	0.690187	0.952313	0.0959248
Var_208	1-palmitoyl-2-arachidonoyl-GPC (16:0/20:4n6)	Lipid	Phosphatidylcholine (PC)	8923140		HMDB07982	10747814	0.181359	166	0.690475	0.97417	0.058918
Var_125	1-arachidonylglycerol (20:4)	Lipid	Monoacylglycerol	4445452	C13857	HMDB11549	5282281	0.189027	173	0.690551	1.93071	1.54344
Var_385	cis-4-decenoylcarnitine (C10:1)	Lipid	Fatty Acid Metabolism(Acyl Carnitine)	28639171				0.183042	167	0.692712	0.929068	0.162388
Var_368	caffeine	Xenobiotics	Xanthine Metabolism	2424	C07481	HMDB01847	2519	0.188605	172	0.693013	0.981501	0.0646365
Var_572	N1-Methyl-4-pyridone-3-carboxamide	Cofactors and Vitamins	Nicotinate and Nicotinamide Metabolism	389671	C05843	HMDB04194	440810	0.187521	171	0.69306	0.780117	0.362467
Var_593	oleoyl-oleoyl-glycerol (18:1/18:1) [1]*	Lipid	Diacylglycerol			HMDB07218		0.185615	169	0.694133	1.03448	0.25107
Var_228	1-stearoyl-2-linoleoyl-GPC (18:0/18:2)*	Lipid	Phosphatidylcholine (PC)			HMDB08039		0.181292	165	0.694402	0.962423	0.0874965
Var_571	N1-Methyl-2-pyridone-5-carboxamide	Cofactors and Vitamins	Nicotinate and Nicotinamide Metabolism	62899	C05842	HMDB04193	69698	0.186831	170	0.694572	0.971012	0.0871076
Var_336	alpha-tocopherol	Cofactors and Vitamins	Tocopherol Metabolism	14265	C02477	HMDB01893	14985	0.209376	190	0.696452	0.984065	0.0346062
Var_486	hexanoylcarnitine (C6)	Lipid	Fatty Acid Metabolism(Acyl Carnitine)	4932273		HMDB00705	6426853	0.209285	189	0.699832	1.03586	0.100183
Var_396	cysteine-glutathione disulfide	Amino Acid	Glutathione Metabolism	3455404		HMDB00656	4247235	0.213186	191	0.705411	1.14535	0.238963
Var_301	4-methyl-2-oxopentanoate	Amino Acid	Leucine, Isoleucine and Valine Metabolism	69	C00233	HMDB00695	70	0.214976	192	0.70763	0.915949	0.159732
Var_322	9-hydroxystearate	Lipid	Fatty Acid, Monohydroxy	7844595		HMDB61661	9570127	0.218496	193	0.715491	0.991259	0.469043
Var_187	1-arachidonoyl-GPC (20:4n6)*	Lipid	Lysophospholipid	21403155	C05208	HMDB10395		0.222983	194	0.726418	1.0873	0.302058
Var_564	N-methylproline	Amino Acid	Urea cycle; Arginine and Proline Metabolism	541			557	0.225123	195	0.729631	1.00963	0.0802916
Var_639	retinol (Vitamin A)	Cofactors and Vitamins	Vitamin A Metabolism	393012	C00473	HMDB00305	445354	0.228232	197	0.732196	0.973037	0.0635835
Var_411	docosadienoate (22:2n6)	Lipid	Polyunsaturated Fatty Acid (n3 and n6)	4445934	C16533	HMDB61714	5282807	0.227219	196	0.732664	1.1272	0.272244
Var_240	13-HODE + 9-HODE	Lipid	Fatty Acid, Monohydroxy				43013	0.233762	200	0.738689	1.15774	0.525898
Var_603	palmitic amide	Lipid	Fatty Acid, Amide	62629		HMDB12273	69421	0.233245	199	0.740759	1.19989	0.435314
Var_121	N-stearoyl-sphinganine (d18:0/18:0)*	Lipid	Sphingolipid Metabolism	4446686			5283573	0.232815	198	0.743126	0.931898	0.233903
Var_274	3-hydroxydecanoate	Lipid	Fatty Acid, Monohydroxy	24790		HMDB02203	26612	0.243308	206	0.74646	1.01953	0.0516772
Var_335	alpha-ketoglutarate	Energy	TCA Cycle	50	C00026	HMDB00208	51	0.244517	207	0.746544	0.95015	0.128557
Var_530	margarate (17:0)	Lipid	Long Chain Fatty Acid	10033		HMDB02259	10465	0.241048	204	0.746777	1.04707	0.145344
Var_112	beta-hydroxyisovalerate	Amino Acid	Leucine, Isoleucine and Valine Metabolism	62571		HMDB00754	69362	0.242898	205	0.748836	0.852646	0.28021
Var_321	7-methylxanthine	Xenobiotics	Xanthine Metabolism	61660	C16353	HMDB01991	68374	0.240863	203	0.749879	0.966976	0.093254
Var_619	phenylpyruvate	Amino Acid	Phenylalanine Metabolism	972	C00166	HMDB00205	997	0.239828	202	0.750353	0.870097	0.295648
Var_398	cystine	Amino Acid	Methionine, Cysteine, SAM and Taurine Metabolism	575	C00491	HMDB00192	67678	0.23908	201	0.751733	0.791941	0.611408
Var_309	5-methylthioadenosine (MTA)	Amino Acid	Polyamine Metabolism	388321	C00170	HMDB01173	439176	0.248808	208	0.755993	0.876929	0.350286
Var_194	1-linoleoyl-GPC (18:2)	Lipid	Lysophospholipid	10160888	C04100	HMDB10386	11988421	0.253295	209	0.765946	1.04208	0.130617
Var_513	leucine	Amino Acid	Leucine, Isoleucine and Valine Metabolism	5880	C00123	HMDB00687	6106	0.258447	212	0.770465	0.971222	0.077216
Var_618	phenyllactate (PLA)	Amino Acid	Phenylalanine Metabolism	3715	C05607	HMDB00779	3848	0.256022	210	0.770505	1.02491	0.11526
Var_590	oleoyl-arachidonoyl-glycerol (18:1/20:4) [1]*	Lipid	Diacylglycerol			HMDB07228		0.26126	214	0.771572	1.05437	0.443227
Var_354	asparagine	Amino Acid	Alanine and Aspartate Metabolism	6031	C00152	HMDB00168	6267	0.257676	211	0.771807	1.04012	0.121875
Var_166	theophylline	Xenobiotics	Xanthine Metabolism	2068	C07130	HMDB01889	2153	0.260629	213	0.77332	1.04832	0.203776
Var_186	1-(1-enyl-stearoyl)-GPE (P-18:0)*	Lipid	Lysoplasmalogen					0.277293	226	0.775438	1.21856	0.871402
Var_178	1-(1-enyl-palmitoyl)-2-oleoyl-GPE (P-16:0/18:1)*	Lipid	Plasmalogen	24769228		HMDB11342		0.266272	217	0.775502	1.05957	0.237389
Var_669	sphingomyelin (d18:2/16:0, d18:1/16:1)*	Lipid	Sphingolipid Metabolism					0.265113	216	0.7757	0.968649	0.0749817
Var_695	theobromine	Xenobiotics	Xanthine Metabolism	5236	C07480	HMDB02825	5429	0.272776	222	0.776553	0.954048	0.102963
Var_575	N2,N2-dimethylguanosine	Nucleotide	Purine Metabolism, Guanine containing	83878		HMDB04824	92919	0.270531	220	0.777163	0.961198	0.109581
Var_620	phosphate	Energy	Oxidative Phosphorylation	1032	C00009	HMDB01429	1061	0.276693	225	0.777201	0.848059	0.368929
Var_137	5alpha-androstan-3alpha,17beta-diol disulfate	Lipid	Androgenic Steroids					0.264673	215	0.778015	1.05554	0.127369
Var_413	docosahexaenoate (DHA; 22:6n3)	Lipid	Polyunsaturated Fatty Acid (n3 and n6)	393183	C06429	HMDB02183	445580	0.268402	218	0.778119	0.915244	0.494459
Var_376	ceramide (d18:1/17:0, d17:1/18:0)*	Lipid	Ceramides					0.272165	221	0.778317	1.05309	0.346435
Var_292	4-acetamidobutanoate	Amino Acid	Polyamine Metabolism	17180	C02946	HMDB03681	18189	0.270186	219	0.779716	1.03815	0.115285
Var_213	1-palmitoyl-2-docosahexaenoyl-GPE (16:0/22:6)*	Lipid	Phosphatidylethanolamine (PE)	7825749		HMDB05324	9546799	0.2764	224	0.779842	1.17255	0.479742
Var_546	N-acetylaspartate (NAA)	Amino Acid	Alanine and Aspartate Metabolism	58576	C01042	HMDB00812	65065	0.275377	223	0.780441	0.893657	0.26037
Var_442	gamma-glutamylhistidine	Peptide	Gamma-glutamyl Amino Acid	5380197			7017195	0.292749	235	0.787307	1.1731	0.457045
Var_381	cholesterol	Lipid	Sterol	4937803	C00187	HMDB00067	11025495	0.291176	233	0.7898	0.963126	0.0814833
Var_494	imidazole lactate	Amino Acid	Histidine Metabolism	389128	C05568	HMDB02320	440129	0.292613	234	0.790305	0.975219	0.0726615
Var_617	phenylalanine	Amino Acid	Phenylalanine Metabolism	5910	C00079	HMDB00159	6140	0.290574	232	0.791563	0.97987	0.0525326
Var_276	3-hydroxyisobutyrate	Amino Acid	Leucine, Isoleucine and Valine Metabolism	10140307	C06001	HMDB00336	87	0.28952	231	0.792108	0.952701	0.281388
Var_348	arachidonate (20:4n6)	Lipid	Polyunsaturated Fatty Acid (n3 and n6)	392692	C00219	HMDB01043	444899	0.284704	227	0.792656	0.95132	0.476031
Var_539	myristoleate (14:1n5)	Lipid	Long Chain Fatty Acid	4444564	C08322	HMDB02000	5281119	0.289285	230	0.794904	0.954005	0.125488
Var_372	carotene diol (1)	Cofactors and Vitamins	Vitamin A Metabolism					0.288183	229	0.795335	1.02605	0.104306
Var_568	N-palmitoyl-sphingosine (d18:1/16:0)	Lipid	Ceramides	4446677		HMDB04949	5283564	0.287498	228	0.796925	1.05942	0.171164
Var_457	glutamine	Amino Acid	Glutamate Metabolism	5746	C00064	HMDB00641	5961	0.299193	236	0.801229	0.980919	0.0492402
Var_151	gamma-glutamylalanine	Peptide	Gamma-glutamyl Amino Acid	389104		HMDB29142	440103	0.30135	237	0.8036	1.14971	0.269128
Var_592	oleoyl-linoleoyl-glycerol (18:1/18:2) [2]	Lipid	Diacylglycerol	29788004		HMDB07219		0.323859	254	0.805823	1.01363	0.0749687
Var_426	erucate (22:1n9)	Lipid	Long Chain Fatty Acid	7924	C08316	HMDB02068	5281116	0.326162	255	0.80837	1.07476	0.181716
Var_488	histidine	Amino Acid	Histidine Metabolism	752	C00135	HMDB00177	6274	0.323694	253	0.808594	0.962438	0.121809
Var_582	nonadecanoate (19:0)	Lipid	Long Chain Fatty Acid	12071	C16535	HMDB00772	12591	0.309796	242	0.809055	1.06731	0.181132
Var_098	N-acetyl-aspartyl-glutamate (NAAG)	Amino Acid	Glutamate Metabolism	5065	C12270	HMDB01067	5255	0.330298	258	0.809101	1.16188	0.299969
Var_622	phytanate	Xenobiotics	Food Component/Plant	10140204	C01607	HMDB00801	26840	0.32791	256	0.809527	1.10674	0.366548
Var_694	taurolithocholate 3-sulfate	Lipid	Secondary Bile Acid Metabolism	389078	C03642	HMDB02580	440071	0.308829	241	0.809875	1.02456	0.122863
Var_510	lactosyl-N-palmitoyl-sphingosine (d18:1/16:0)	Lipid	Ceramides					0.334477	261	0.809921	1.03241	0.0861577
Var_109	5alpha-androstan-3beta,17alpha-diol disulfate	Lipid	Androgenic Steroids					0.329562	257	0.81044	1.05914	0.36396
Var_549	N-acetylglycine	Amino Acid	Glycine, Serine and Threonine Metabolism	10507		HMDB00532	10972	0.332276	259	0.810805	1.10849	0.450044
Var_460	glycerate	Carbohydrate	Glycolysis, Gluconeogenesis, and Pyruvate Metabolism	732	C00258	HMDB00139	752	0.333568	260	0.810826	1.03148	0.10926
Var_425	ergothioneine	Xenobiotics	Food Component/Plant	2297320	C05570	HMDB03045	3032311	0.323658	252	0.811713	1.05031	0.156058
Var_136	5alpha-androstan-3alpha,17alpha-diol monosulfate	Lipid	Androgenic Steroids					0.322463	251	0.811938	1.04215	0.323877
Var_708	urate	Nucleotide	Purine Metabolism, (Hypo)Xanthine/Inosine containing		C00366	HMDB00289	1175	0.312406	243	0.812513	0.963977	0.137414
Var_238	10-nonadecenoate (19:1n9)	Lipid	Long Chain Fatty Acid	4471938		HMDB13622	5312513	0.320247	249	0.812836	1.10025	0.352971
Var_392	creatinine	Amino Acid	Creatine Metabolism	568	C00791	HMDB00562	588	0.308675	240	0.812843	0.983102	0.0499969
Var_210	1-palmitoyl-2-arachidonoyl-GPI (16:0/20:4)*	Lipid	Phosphatidylinositol (PI)	24767674		HMDB09789		0.321848	250	0.813631	1.30237	0.647365
Var_654	sphingomyelin (d18:0/18:0, d19:0/17:0)*	Lipid	Sphingolipid Metabolism	24846878		HMDB12087		0.306431	238	0.813716	0.97511	0.0679376
Var_661	sphingomyelin (d18:1/20:1, d18:2/20:0)*	Lipid	Sphingolipid Metabolism					0.319987	248	0.815451	0.973733	0.0834006
Var_195	1-linoleoyl-GPE (18:2)*	Lipid	Lysophospholipid	21403170		HMDB11507	52925130	0.308436	239	0.815613	1.05611	0.213606
Var_387	citrate	Energy	TCA Cycle	305	C00158	HMDB00094	311	0.315725	244	0.817779	0.932092	0.265358
Var_279	3-indoxyl sulfate	Amino Acid	Tryptophan Metabolism	9840		HMDB00682	10258	0.317143	245	0.818099	0.919534	0.267114
Var_438	gamma-glutamyl-epsilon-lysine	Peptide	Gamma-glutamyl Amino Acid	5378717		HMDB03869	7015685	0.319842	247	0.818381	1.14517	0.356063
Var_475	glycosyl ceramide (d18:2/24:1, d18:1/24:2)*	Lipid	Ceramides					0.342544	264	0.820028	0.974298	0.0710207
Var_538	myristate (14:0)	Lipid	Long Chain Fatty Acid	10539	C06424	HMDB00806	11005	0.341317	263	0.820198	0.956885	0.19441
Var_235	1-stearoyl-GPE (18:0)	Lipid	Lysophospholipid	7826018		HMDB11130	9547068	0.34008	262	0.820346	1.15383	0.342132
Var_591	oleoyl-linoleoyl-glycerol (18:1/18:2) [1]	Lipid	Diacylglycerol	23975985		HMDB07219		0.319539	246	0.820929	1.01663	0.128844
Var_587	oleamide	Lipid	Fatty Acid, Amide	4446508	C19670	HMDB02117	5283387	0.35	268	0.825374	1.15009	0.422449
Var_461	glycerol	Lipid	Glycerolipid Metabolism	733	C00116	HMDB00131	753	0.351545	269	0.825934	0.929531	0.215089
Var_416	docosapentaenoate (n6 DPA; 22:5n6)	Lipid	Polyunsaturated Fatty Acid (n3 and n6)	4945614	C16513	HMDB01976	6441454	0.354657	271	0.827097	0.934553	0.210747
Var_683	stearoyl sphingomyelin (d18:1/18:0)	Lipid	Sphingolipid Metabolism	4956085	C00550	HMDB01348	6453725	0.349491	267	0.82726	0.973507	0.0821206
Var_220	1-palmitoyl-2-palmitoleoyl-GPC (16:0/16:1)*	Lipid	Phosphatidylcholine (PC)			HMDB07969		0.371929	284	0.827673	1.02549	0.0587509
Var_648	serine	Amino Acid	Glycine, Serine and Threonine Metabolism	5736	C00065	HMDB00187	5951	0.353721	270	0.82797	1.02395	0.0947256
Var_535	methylmalonate (MMA)	Lipid	Fatty Acid Metabolism (also BCAA Metabolism)	473	C02170	HMDB00202	487	0.36704	280	0.828461	0.912937	0.324728
Var_361	betaine	Amino Acid	Glycine, Serine and Threonine Metabolism	24219951173	C00719	HMDB00043	247	0.368659	281	0.829154	0.983261	0.0506033
Var_434	galactitol (dulcitol)	Carbohydrate	Fructose, Mannose and Galactose Metabolism	11357	C01697	HMDB00107	11850	0.371394	283	0.829404	1.04812	0.550233
Var_352	argininate*	Amino Acid	Urea cycle; Arginine and Proline Metabolism	140984		HMDB03148	160437	0.349284	266	0.829878	0.947587	0.0892686
Var_497	indoleacetate	Amino Acid	Tryptophan Metabolism	780	C00954	HMDB00197	802	0.357326	272	0.830258	1.05299	0.102346
Var_358	behenoyl sphingomyelin (d18:1/22:0)*	Lipid	Sphingolipid Metabolism	24846873		HMDB12103		0.370537	282	0.830423	0.93685	0.216168
Var_288	3-methylxanthine	Xenobiotics	Xanthine Metabolism	63805	C16357	HMDB01886	70639	0.348271	265	0.830593	0.958302	0.092675
Var_598	orotate	Nucleotide	Pyrimidine Metabolism, Orotate containing	942	C00295	HMDB00226	967	0.366771	279	0.830821	1.09129	0.24628
Var_102	palmitoleoyl-linoleoyl-glycerol (16:1/18:2) [1]*	Lipid	Diacylglycerol			HMDB07132		0.359016	273	0.831129	1.29117	0.382157
Var_104	quinate	Xenobiotics	Food Component/Plant	10246715	C00296	HMDB03072	6508	0.365932	278	0.831904	1.07093	0.159625
Var_644	S-methylcysteine sulfoxide	Amino Acid	Methionine, Cysteine, SAM and Taurine Metabolism	74136		HMDB29432	82142	0.365058	277	0.832911	1.06491	0.236618
Var_470	glycodeoxycholate sulfate	Lipid	Secondary Bile Acid Metabolism					0.387724	294	0.833475	1.00185	0.125177
Var_421	eicosapentaenoate (EPA; 20:5n3)	Lipid	Polyunsaturated Fatty Acid (n3 and n6)	393682	C06428	HMDB01999	446284	0.376125	285	0.834073	1.0354	0.547938
Var_496	iminodiacetate (IDA)	Xenobiotics	Chemical	8557	C19911	HMDB11753	8897	0.361953	274	0.834869	0.910322	0.346597
Var_480	glycosyl-N-stearoyl-sphingosine (d18:1/18:0)	Lipid	Ceramides					0.364678	276	0.835061	0.966328	0.0704711
Var_696	thioproline	Xenobiotics	Chemical	84120			93176	0.387359	293	0.835532	0.948903	0.351238
Var_402	deoxycarnitine	Lipid	Carnitine Metabolism	705	C01181	HMDB01161	134	0.391427	296	0.835749	0.985808	0.0516801
Var_525	lysine	Amino Acid	Lysine Metabolism	5747	C00047	HMDB00182	5962	0.363802	275	0.836084	0.981219	0.0629142
Var_636	pyroglutamine*	Amino Acid	Glutamate Metabolism	118562			134508	0.390269	295	0.836103	0.964713	0.0714971
Var_483	guanidinoacetate	Amino Acid	Creatine Metabolism	743	C00581	HMDB00128	763	0.386947	292	0.837502	0.962678	0.177574
Var_569	N-stearoyl-sphingosine (d18:1/18:0)*	Lipid	Ceramides	4446678		HMDB04950	5283565	0.38585	291	0.837998	1.02409	0.0972918
Var_614	perfluorooctanesulfonic acid (PFOS)	Xenobiotics	Chemical	67068	C18142	HMDB59586	74483	0.38488	290	0.838773	1.05755	0.0898319
Var_286	3-methylglutarylcarnitine (2)	Amino Acid	Leucine, Isoleucine and Valine Metabolism	113619		HMDB00552	128145	0.394449	297	0.839366	0.96502	0.20933
Var_262	2-oxoarginine*	Amino Acid	Urea cycle; Arginine and Proline Metabolism	542	C03771	HMDB04225	558	0.398748	300	0.840029	0.91855	0.174156
Var_533	methionine sulfone	Amino Acid	Methionine, Cysteine, SAM and Taurine Metabolism	63154			69961	0.384289	289	0.840383	0.973569	0.114141
Var_280	3-methoxycatechol sulfate (1)	Xenobiotics	Benzoate Metabolism					0.396747	298	0.841423	1.01854	0.251085
Var_315	5alpha-pregnan-3beta,20alpha-diol disulfate	Lipid	Progestin Steroids					0.398304	299	0.841901	0.969766	0.11511
Var_158	N-palmitoylglycine	Lipid	Fatty Acid Metabolism(Acyl Glycine)	133100		HMDB13034	151008	0.383904	288	0.842456	1.0647	0.239987
Var_711	valine	Amino Acid	Leucine, Isoleucine and Valine Metabolism	6050	C00183	HMDB00883	6287	0.38146	286	0.842947	0.988636	0.0363129
Var_634	pyridoxal	Cofactors and Vitamins	Vitamin B6 Metabolism	1021	C00250	HMDB01545	1050	0.383456	287	0.844406	0.978417	0.0817063
Var_638	quinolinate	Cofactors and Vitamins	Nicotinate and Nicotinamide Metabolism	1037	C03722	HMDB00232	1066	0.404467	301	0.849247	0.940588	0.206492
Var_164	taurochenodeoxycholate	Lipid	Primary Bile Acid Metabolism	343282	C05465	HMDB00951	387316	0.406548	302	0.850789	1.07693	0.161486
Var_334	alpha-hydroxyisovalerate	Amino Acid	Leucine, Isoleucine and Valine Metabolism	90190		HMDB00407	99823	0.40803	303	0.851072	1.06176	0.15804
Var_684	stearoyl-arachidonoyl-glycerol (18:0/20:4) [1]*	Lipid	Diacylglycerol					0.413723	307	0.851704	1.07217	0.27525
Var_247	2-aminoadipate	Amino Acid	Lysine Metabolism	456	C00956	HMDB00510	469	0.412652	306	0.852274	1.05224	0.345315
Var_706	tryptophan betaine	Amino Acid	Tryptophan Metabolism	390633	C09213	HMDB61115	442106	0.41026	304	0.852909	0.932501	0.0757155
Var_205	1-oleoyl-GPE (18:1)	Lipid	Lysophospholipid	7826021		HMDB11506	9547071	0.415754	308	0.853106	1.01598	0.224891
Var_144	caffeic acid sulfate	Xenobiotics	Xanthine Metabolism	30777608		HMDB41708		0.411906	305	0.853524	0.828572	0.313989
Var_172	1-(1-enyl-oleoyl)-GPE (P-18:1)*	Lipid	Lysoplasmalogen					0.419576	310	0.855394	1.27841	0.858753
Var_563	N-methylpipecolate	Xenobiotics	Bacterial/Fungal	9461516			11286529	0.421769	311	0.857101	0.94625	0.229877
Var_699	thyroxine	Amino Acid	Tyrosine Metabolism	5614	C01829	HMDB01918	5819	0.419382	309	0.857765	0.977505	0.0758774
Var_581	nicotinamide	Cofactors and Vitamins	Nicotinate and Nicotinamide Metabolism	911	C00153	HMDB01406	936	0.432288	313	0.872862	0.883106	0.304233
Var_612	pantothenate	Cofactors and Vitamins	Pantothenate and CoA Metabolism	6361	C00864	HMDB00210	6613	0.443643	321	0.873465	0.942264	0.183221
Var_688	succinimide	Xenobiotics	Chemical	10955	C07273		11439	0.431582	312	0.87423	0.951176	0.267304
Var_514	lignoceroyl sphingomyelin (d18:1/24:0)	Lipid	Sphingolipid Metabolism	24846875				0.459389	332	0.874499	1.00689	0.0630609
Var_462	glycerol 3-phosphate	Lipid	Glycerolipid Metabolism	734	C00093	HMDB00126	754	0.445929	322	0.87524	1.10736	0.299505
Var_707	tyrosine	Amino Acid	Tyrosine Metabolism	5833	C00082	HMDB00158	6057	0.447409	323	0.875425	0.981739	0.0734489
Var_512	laurylcarnitine (C12)	Lipid	Fatty Acid Metabolism(Acyl Carnitine)	8602997		HMDB02250	10427569	0.4488	324	0.875436	1.03465	0.0752501
Var_455	glucuronate	Carbohydrate	Aminosugar Metabolism	58552	C00191	HMDB00127	444791	0.450208	325	0.875482	1.03425	0.145582
Var_621	phosphoethanolamine	Lipid	Phospholipid Metabolism	990	C00346	HMDB00224	1015	0.443336	320	0.875589	0.80656	0.397934
Var_687	succinate	Energy	TCA Cycle	1078	C00042	HMDB00254	1110	0.442204	319	0.876091	1.05188	0.188178
Var_570	N-trimethyl 5-aminovalerate	Amino Acid	Lysine Metabolism	34236878				0.435599	314	0.876746	0.973439	0.0848936
Var_103	paraxanthine	Xenobiotics	Xanthine Metabolism	4525	C13747	HMDB01860	4687	0.459284	331	0.876941	0.999886	0.119173
Var_430	etiocholanolone glucuronide	Lipid	Androgenic Steroids			HMDB04484	270605	0.462309	333	0.877414	0.957777	0.121647
Var_092	1-stearoyl-2-docosahexaenoyl-GPE (18:0/22:6)*	Lipid	Phosphatidylethanolamine (PE)	7825748		HMDB05334	9546798	0.458435	330	0.877972	0.841115	0.479038
Var_566	N-palmitoyl-sphingadienine (d18:2/16:0)*	Lipid	Sphingolipid Metabolism					0.440397	317	0.878016	1.03014	0.109849
Var_600	oxalate (ethanedioate)	Cofactors and Vitamins	Ascorbate and Aldarate Metabolism	946	C00209	HMDB02329	971	0.441888	318	0.878218	1.11069	0.351255
Var_200	1-methylnicotinamide	Cofactors and Vitamins	Nicotinate and Nicotinamide Metabolism	8305504	C02918	HMDB00699	10129985	0.45356	326	0.879294	0.979691	0.070003
Var_693	taurocholenate sulfate	Lipid	Secondary Bile Acid Metabolism					0.455111	327	0.879602	1.08046	0.112727
Var_331	alanine	Amino Acid	Alanine and Aspartate Metabolism	5735	C00041	HMDB00161	5950	0.458089	329	0.879976	1.01776	0.0861545
Var_504	isovalerylcarnitine (C5)	Amino Acid	Leucine, Isoleucine and Valine Metabolism	4932271		HMDB00688	6426851	0.44029	316	0.880579	0.937909	0.154631
Var_420	eicosanodioate	Lipid	Fatty Acid, Dicarboxylate	68030			75502	0.439222	315	0.881233	0.981442	0.150089
Var_066	beta-guanidinopropanoate	Xenobiotics	Food Component/Plant	61020	C03065	HMDB13222	67701	0.457908	328	0.882311	0.818293	0.935485
Var_320	7-methylguanine	Nucleotide	Purine Metabolism, Guanine containing	10883	C02242	HMDB00897	11361	0.495968	353	0.887966	0.992824	0.0318249
Var_419	ectoine	Xenobiotics	Chemical	112069	C06231		126041	0.495178	352	0.88907	0.968609	0.242483
Var_482	glycoursodeoxycholate	Lipid	Secondary Bile Acid Metabolism	19973534		HMDB00708	12310288	0.499484	355	0.889223	1.05526	0.158274
Var_624	piperine	Xenobiotics	Food Component/Plant	553590	C03882	HMDB29377	638024	0.48408	344	0.889357	0.969304	0.095862
Var_448	gamma-glutamyltryptophan	Peptide	Gamma-glutamyl Amino Acid	2302065		HMDB29160	3989307	0.494096	351	0.889654	0.95352	0.306523
Var_106	1,7-dimethylurate	Xenobiotics	Xanthine Metabolism	82720	C16356	HMDB11103	91611	0.482898	343	0.88977	1.02165	0.294979
Var_380	cholate	Lipid	Primary Bile Acid Metabolism		C00695	HMDB00619	221493	0.493058	350	0.890322	0.965082	0.179888
Var_666	sphingomyelin (d18:1/24:1, d18:2/24:0)*	Lipid	Sphingolipid Metabolism	24846874		HMDB12107		0.474752	337	0.890337	0.972467	0.117055
Var_429	ethylmalonate	Amino Acid	Leucine, Isoleucine and Valine Metabolism	11263		HMDB00622	11756	0.480456	341	0.890463	0.988327	0.0981905
Var_330	adrenate (22:4n6)	Lipid	Polyunsaturated Fatty Acid (n3 and n6)	4445971	C16527	HMDB02226	5497181	0.473793	336	0.891183	1.04332	0.283711
Var_588	oleate/vaccenate (18:1)	Lipid	Long Chain Fatty Acid					0.499254	354	0.891324	1.01149	0.112103
Var_386	citraconate/glutaconate	Energy	TCA Cycle					0.479701	340	0.89168	1.01111	0.0896628
Var_441	gamma-glutamylglycine	Peptide	Gamma-glutamyl Amino Acid	145071		HMDB11667	165527	0.47271	335	0.8918	1.01924	0.107199
Var_404	dihomo-linoleate (20:2n6)	Lipid	Polyunsaturated Fatty Acid (n3 and n6)	4944228	C16525	HMDB05060	6439848	0.482651	342	0.891917	1.06352	0.242123
Var_364	bilirubin (Z,Z)	Cofactors and Vitamins	Hemoglobin and Porphyrin Metabolism	4444055	C00486	HMDB00054	5280352	0.492582	349	0.892011	1.01059	0.0641509
Var_185	1-(1-enyl-stearoyl)-2-oleoyl-GPE (P-18:0/18:1)	Lipid	Plasmalogen	24769260		HMDB11375		0.471492	334	0.892165	1.10909	0.667814
Var_159	N-stearoyl-sphingadienine (d18:2/18:0)*	Lipid	Ceramides					0.502678	356	0.892395	1.12854	0.495593
Var_544	N-acetylalanine	Amino Acid	Alanine and Aspartate Metabolism	79449	C02847	HMDB00766	88064	0.477271	338	0.892412	1.09658	0.317679
Var_176	1-(1-enyl-palmitoyl)-2-linoleoyl-GPE (P-16:0/18:2)*	Lipid	Plasmalogen	24769229		HMDB11343		0.491575	348	0.892746	1.01335	0.146909
Var_709	urea	Amino Acid	Urea cycle; Arginine and Proline Metabolism	1143	C00086	HMDB00294	1176	0.48736	345	0.892788	0.970874	0.103766
Var_252	2-hydroxy-3-methylvalerate	Amino Acid	Leucine, Isoleucine and Valine Metabolism	144317		HMDB00317	164623	0.479492	339	0.89392	1.03086	0.338281
Var_515	lignoceroylcarnitine (C24)*	Lipid	Fatty Acid Metabolism(Acyl Carnitine)					0.489445	346	0.894015	0.990457	0.112454
Var_484	gulonate*	Cofactors and Vitamins	Ascorbate and Aldarate Metabolism	7969943	C00257	HMDB03290	9794176	0.490888	347	0.894067	1.06971	0.27301
Var_560	N-behenoyl-sphingadienine (d18:2/22:0)*	Lipid	Sphingolipid Metabolism					0.507556	358	0.89602	0.982952	0.176448
Var_244	17-methylstearate	Lipid	Fatty Acid, Branched	2340933		HMDB37397	3083779	0.507074	357	0.897678	1.09043	0.301297
Var_199	1-methylimidazoleacetate	Amino Acid	Histidine Metabolism	68319	C05828	HMDB02820	75810	0.510671	359	0.899009	0.984623	0.0816077
Var_226	1-stearoyl-2-arachidonoyl-GPI (18:0/20:4)	Lipid	Phosphatidylinositol (PI)	21403055		HMDB09815		0.512755	360	0.90017	1.10222	0.594949
Var_209	1-palmitoyl-2-arachidonoyl-GPE (16:0/20:4)*	Lipid	Phosphatidylethanolamine (PE)	7825750		HMDB05323	9546800	0.527656	370	0.901293	1.03291	0.206259
Var_246	2,3-dihydroxyisovalerate	Xenobiotics	Food Component/Plant	657	C04039	HMDB12141	677	0.547972	384	0.901871	0.974348	0.345065
Var_649	spermidine	Amino Acid	Polyamine Metabolism	1071	C00315	HMDB01257	1102	0.526612	369	0.901948	1.18436	0.649015
Var_410	dimethylglycine	Amino Acid	Glycine, Serine and Threonine Metabolism	653	C01026	HMDB00092	673	0.525857	368	0.903102	0.988602	0.0496637
Var_157	malonate	Lipid	Fatty Acid Synthesis	844	C00383	HMDB00691	867	0.547372	383	0.903236	1.02905	0.532572
Var_167	ursodeoxycholate	Lipid	Secondary Bile Acid Metabolism	29131	C07880	HMDB00946	31401	0.53032	371	0.903402	1.07553	0.527538
Var_528	mannitol/sorbitol	Carbohydrate	Fructose, Mannose and Galactose Metabolism	440	C00794	HMDB00247	5780	0.546943	382	0.904889	1.03487	0.14146
Var_355	aspartate	Amino Acid	Alanine and Aspartate Metabolism	5745	C00049	HMDB00191	5960	0.525476	367	0.904906	1.36012	1.24444
Var_383	choline phosphate	Lipid	Phospholipid Metabolism	119298	C00588	HMDB01565	1014	0.518329	362	0.904928	0.968581	0.35316
Var_375	ceramide (d18:1/14:0, d16:1/16:0)*	Lipid	Ceramides					0.517302	361	0.905637	0.972889	0.166702
Var_100	N-formylanthranilic acid	Amino Acid	Tryptophan Metabolism	91624	C05653	HMDB04089	101399	0.520193	363	0.90568	0.959067	0.239393
Var_183	1-(1-enyl-stearoyl)-2-arachidonoyl-GPE (P-18:0/20:4)*	Lipid	Plasmalogen	7826008		HMDB05779	9547058	0.551782	385	0.905783	1.06165	0.337423
Var_308	5-dodecenoate (12:1n7)	Lipid	Medium Chain Fatty Acid	4471803		HMDB00529	5312378	0.524662	366	0.905973	1.03341	0.0814555
Var_660	sphingomyelin (d18:1/20:0, d16:1/22:0)*	Lipid	Sphingolipid Metabolism	23113477		HMDB12102		0.541882	378	0.906003	1.01036	0.0462602
Var_219	1-palmitoyl-2-oleoyl-GPI (16:0/18:1)*	Lipid	Phosphatidylinositol (PI)	24767668		HMDB09783		0.540452	377	0.906009	0.953617	0.20289
Var_498	indolelactate	Amino Acid	Tryptophan Metabolism	83867	C02043	HMDB00671	92904	0.537728	375	0.906251	1.02295	0.13371
Var_257	2-hydroxyoctanoate	Lipid	Fatty Acid, Monohydroxy	84994		HMDB02264	94180	0.553616	386	0.906439	1.04767	1.24931
Var_465	glycochenodeoxycholate	Lipid	Primary Bile Acid Metabolism		C05466	HMDB00637	12544	0.543725	379	0.906687	1.02604	0.152145
Var_443	gamma-glutamylisoleucine*	Peptide	Gamma-glutamyl Amino Acid	21403145		HMDB11170	14253342	0.546671	381	0.906813	0.921634	0.354533
Var_580	nervonate (24:1n9)*	Lipid	Long Chain Fatty Acid	4444565	C08323	HMDB02368	5281120	0.562478	392	0.906853	1.07291	0.221299
Var_670	sphingomyelin (d18:2/18:1)*	Lipid	Sphingolipid Metabolism					0.537209	374	0.907796	1.01163	0.0758384
Var_453	gluconate	Xenobiotics	Food Component/Plant	10240	C00257	HMDB00625	10690	0.522918	364	0.907924	0.963904	0.187391
Var_359	beta-alanine	Nucleotide	Pyrimidine Metabolism, Uracil containing	234	C00099	HMDB00056	239	0.524562	365	0.908283	0.977359	0.122748
Var_313	5alpha-androstan-3alpha,17beta-diol monosulfate (2)	Lipid	Androgenic Steroids					0.540416	376	0.908359	1.00252	0.153698
Var_567	N-palmitoyl-sphinganine (d18:0/16:0)	Lipid	Sphingolipid Metabolism	4446685		HMDB11760	5283572	0.536361	373	0.908794	0.999742	0.106093
Var_216	1-palmitoyl-2-linoleoyl-GPI (16:0/18:2)	Lipid	Phosphatidylinositol (PI)	21403024		HMDB09784		0.546542	380	0.908986	0.984915	0.153015
Var_190	1-lignoceroyl-GPC (24:0)	Lipid	Lysophospholipid	24766539		HMDB10405		0.56243	391	0.909094	1.02372	0.20329
Var_182	1-(1-enyl-palmitoyl)-GPE (P-16:0)*	Lipid	Lysoplasmalogen	10471193				0.566127	393	0.910413	1.12227	0.655861
Var_389	cortisol	Lipid	Corticosteroids		C00735	HMDB00063	5754	0.535903	372	0.910459	0.994498	0.134322
Var_714	ximenoylcarnitine (C26:1)*	Lipid	Fatty Acid Metabolism(Acyl Carnitine)					0.557795	387	0.910921	0.981445	0.0937683
Var_256	2-hydroxynervonate*	Lipid	Fatty Acid, Monohydroxy	4472208			5312783	0.559366	388	0.911133	1.05576	0.23853
Var_628	pregnenolone sulfate	Lipid	Pregnenolone Steroids	94802		HMDB00774	105074	0.562321	390	0.911248	1.02061	0.158122
Var_378	ceramide (d18:2/24:1, d18:1/24:2)*	Lipid	Ceramides					0.568149	394	0.911346	0.989245	0.0526034
Var_641	ribonate	Carbohydrate	Pentose Metabolism	4574162	C01685	HMDB00867	5460677	0.570681	395	0.91309	1.21936	0.489534
Var_400	decanoylcarnitine (C10)	Lipid	Fatty Acid Metabolism(Acyl Carnitine)	8420677		HMDB00651	10245190	0.562293	389	0.913545	1.00988	0.0860538
Var_700	trans-4-hydroxyproline	Amino Acid	Urea cycle; Arginine and Proline Metabolism	5605	C01157	HMDB00725	5810	0.582031	399	0.921914	1.04308	0.136691
Var_261	2-methylbutyrylcarnitine (C5)	Amino Acid	Leucine, Isoleucine and Valine Metabolism	4932320		HMDB00378	6426901	0.579295	397	0.922203	1.01212	0.0762531
Var_464	glycine	Amino Acid	Glycine, Serine and Threonine Metabolism	730	C00037	HMDB00123	750	0.583901	400	0.922564	1.00857	0.0763795
Var_250	2-aminooctanoate	Lipid	Fatty Acid, Amino	62727		HMDB00991	69522	0.581125	398	0.922792	0.997326	0.099002
Var_541	myristoyl dihydrosphingomyelin (d18:0/14:0)*	Lipid	Sphingolipid Metabolism	24846886		HMDB12085		0.578621	396	0.923456	1.01324	0.16793
Var_449	gamma-glutamyltyrosine	Peptide	Gamma-glutamyl Amino Acid	85142		HMDB11741	94340	0.590573	401	0.930778	0.951195	0.3078
Var_171	1,5-anhydroglucitol (1,5-AG)	Carbohydrate	Glycolysis, Gluconeogenesis, and Pyruvate Metabolism		C07326	HMDB02712	64960	0.594102	402	0.934012	0.985298	0.17936
Var_168	1,2,3-benzenetriol sulfate (2)	Xenobiotics	Chemical					0.598083	404	0.935615	0.902016	0.261778
Var_629	pristanate	Lipid	Fatty Acid, Branched	110458		HMDB00795	123929	0.596773	403	0.935882	0.9263	0.337973
Var_557	N-acetyltaurine	Amino Acid	Methionine, Cysteine, SAM and Taurine Metabolism	140553			159864	0.608488	406	0.947203	0.976252	0.467453
Var_152	glycochenodeoxycholate glucuronide (1)	Lipid	Primary Bile Acid Metabolism					0.607504	405	0.948006	0.991087	0.144072
Var_576	N4-acetylcytidine	Nucleotide	Pyrimidine Metabolism, Cytidine containing	96702		HMDB05923	107461	0.611287	407	0.949222	0.947016	0.711784
Var_282	3-methyl-2-oxobutyrate	Amino Acid	Leucine, Isoleucine and Valine Metabolism	48	C00141	HMDB00019	49	0.6697	444	0.953267	0.974728	0.150325
Var_304	5,6-dihydrothymine	Nucleotide	Pyrimidine Metabolism, Thymine containing	84456	C00906	HMDB00079	93556	0.618913	410	0.954032	1.0665	0.305186
Var_492	hypotaurine	Amino Acid	Methionine, Cysteine, SAM and Taurine Metabolism	96959	C00519	HMDB00965	107812	0.668983	443	0.954395	1.22926	0.922846
Var_516	linoleamide (18:2n6)	Lipid	Fatty Acid, Amide	4940587			6435901	0.621145	411	0.955142	1.07687	0.422354
Var_394	cysteine	Amino Acid	Methionine, Cysteine, SAM and Taurine Metabolism	5653	C00097	HMDB00574	5862	0.668122	442	0.955323	1.015	0.164588
Var_652	sphingomyelin (d17:1/16:0, d18:1/15:0, d16:1/17:0)*	Lipid	Sphingolipid Metabolism	28532779				0.618317	409	0.955443	1.00898	0.150358
Var_293	4-allylphenol sulfate	Xenobiotics	Food Component/Plant					0.626434	414	0.956295	1.00976	0.216031
Var_447	gamma-glutamylthreonine	Peptide	Gamma-glutamyl Amino Acid	21403107		HMDB29159	76078708	0.665926	440	0.956511	0.987485	0.0925841
Var_192	1-linoleoyl-2-arachidonoyl-GPC (18:2/20:4n6)*	Lipid	Phosphatidylcholine (PC)	24766809		HMDB08147		0.667673	441	0.956847	0.987739	0.070227
Var_245	2'-O-methylcytidine	Nucleotide	Pyrimidine Metabolism, Cytidine containing	133067			150971	0.617774	408	0.956945	1.0109	0.236112
Var_230	1-stearoyl-2-linoleoyl-GPI (18:0/18:2)	Lipid	Phosphatidylinositol (PI)	24767694		HMDB09809		0.664747	439	0.956994	0.980211	0.14311
Var_585	octadecanedioate	Lipid	Fatty Acid, Dicarboxylate	63283		HMDB00782	70095	0.683083	451	0.957224	0.955677	0.409563
Var_146	ceramide (d16:1/24:1, d18:1/22:1)*	Lipid	Ceramides					0.624271	412	0.957619	1.01268	0.389077
Var_215	1-palmitoyl-2-linoleoyl-GPE (16:0/18:2)	Lipid	Phosphatidylethanolamine (PE)	7825697		HMDB05322	9546747	0.660752	436	0.957787	1.03402	0.32879
Var_474	glycosyl ceramide (d18:1/23:1, d17:1/24:1)*	Lipid	Ceramides					0.662545	437	0.958189	0.972742	0.266058
Var_710	uridine	Nucleotide	Pyrimidine Metabolism, Uracil containing	5807	C00299	HMDB00296	6029	0.679304	448	0.958303	1.04913	0.400561
Var_232	1-stearoyl-2-oleoyl-GPE (18:0/18:1)	Lipid	Phosphatidylethanolamine (PE)			HMDB08993		0.626245	413	0.958321	1.02616	0.36803
Var_526	malate	Energy	TCA Cycle	510	C00149	HMDB00156	525	0.682577	450	0.958642	1.03199	0.139053
Var_556	N-acetylserine	Amino Acid	Glycine, Serine and Threonine Metabolism	58744		HMDB02931	65249	0.664425	438	0.958714	0.975867	0.130788
Var_163	pyrraline	Xenobiotics	Food Component/Plant	19980286		HMDB33143	122228	0.66016	435	0.959129	0.931979	0.414408
Var_499	indolepropionate	Amino Acid	Tryptophan Metabolism	3613		HMDB02302	3744	0.682026	449	0.960002	0.968806	0.132188
Var_554	N-acetylphenylalanine	Amino Acid	Phenylalanine Metabolism	67404	C03519	HMDB00512	74839	0.67915	447	0.96023	0.987393	0.297365
Var_314	5alpha-androstan-3beta,17beta-diol disulfate	Lipid	Androgenic Steroids		C12525	HMDB00493	242332	0.630631	415	0.960383	0.989601	0.161728
Var_678	stachydrine	Xenobiotics	Food Component/Plant	103115	C10172	HMDB04827	115244	0.632263	416	0.960554	1.01327	0.052774
Var_110	acisoga	Amino Acid	Polyamine Metabolism	114601			129397	0.653643	430	0.960703	0.98411	0.188584
Var_471	glycohyocholate	Lipid	Secondary Bile Acid Metabolism					0.676489	445	0.960766	1.01733	0.11371
Var_124	vanillylmandelate (VMA)	Amino Acid	Tyrosine Metabolism	1207	C05584	HMDB00291	1245	0.655373	431	0.961011	1.0892	0.500027
Var_436	gamma-CEHC	Cofactors and Vitamins	Tocopherol Metabolism	117455		HMDB01931	133098	0.658486	433	0.961115	1.00804	0.316531
Var_403	deoxycholate	Lipid	Secondary Bile Acid Metabolism	389318	C04483	HMDB00626	222528	0.660105	434	0.961258	0.94771	0.263507
Var_553	N-acetylneuraminate	Carbohydrate	Aminosugar Metabolism	10292217	C00270	HMDB00230	439197	0.636124	418	0.961795	0.950206	0.192123
Var_412	docosadioate	Lipid	Fatty Acid, Dicarboxylate	214170	C19625		244872	0.678844	446	0.961949	0.967249	0.32793
Var_698	threonine	Amino Acid	Glycine, Serine and Threonine Metabolism	6051	C00188	HMDB00167	6288	0.657814	432	0.962358	1.00751	0.0440118
Var_446	gamma-glutamylphenylalanine	Peptide	Gamma-glutamyl Amino Acid	99868		HMDB00594	111299	0.653621	429	0.962911	1.03663	0.308647
Var_312	5alpha-androstan-3alpha,17beta-diol monosulfate (1)	Lipid	Androgenic Steroids					0.635398	417	0.963002	0.904593	0.243789
Var_074	p-cresol-glucuronide*	Amino Acid	Tyrosine Metabolism	135751		HMDB11686	154035	0.690904	453	0.963911	0.866251	0.235212
Var_258	2-hydroxypalmitate	Lipid	Fatty Acid, Monohydroxy	83805		HMDB31057	92836	0.689562	452	0.964166	1.06783	0.209763
Var_615	phenol sulfate	Amino Acid	Tyrosine Metabolism	67018	C02180	HMDB60015	74426	0.69288	454	0.964538	1.01029	0.0557618
Var_317	5alpha-pregnan-3beta,20beta-diol monosulfate (1)	Lipid	Progestin Steroids					0.653245	428	0.964605	0.990963	0.119889
Var_548	N-acetylglutamate	Amino Acid	Glutamate Metabolism	1266066	C00624	HMDB01138	70914	0.650764	426	0.965452	1.02773	0.203433
Var_664	sphingomyelin (d18:1/22:1, d18:2/22:0, d16:1/24:1)*	Lipid	Sphingolipid Metabolism	29368329		HMDB12104		0.649242	425	0.965461	1.0087	0.0552387
Var_509	lactosyl-N-nervonoyl-sphingosine (d18:1/24:1)*	Lipid	Ceramides	24846896				0.65242	427	0.965643	1.01554	0.0666026
Var_107	1-methylurate	Xenobiotics	Xanthine Metabolism	62926	C16359	HMDB03099	69726	0.647846	424	0.965658	0.938375	0.266946
Var_458	glutarate (pentanedioate)	Lipid	Fatty Acid, Dicarboxylate	3618533	C00489	HMDB00661	743	0.647114	423	0.966847	1.09272	0.234978
Var_477	glycosyl-N-behenoyl-sphingadienine (d18:2/22:0)*	Lipid	Ceramides					0.698044	456	0.967464	0.982887	0.182306
Var_303	4-vinylphenol sulfate	Xenobiotics	Benzoate Metabolism	4932200	C05627	HMDB04072	6426766	0.699735	457	0.967685	0.960981	0.183053
Var_559	N-acetyltryptophan	Amino Acid	Tryptophan Metabolism	610602	C03137	HMDB13713	700653	0.64671	422	0.968533	0.956401	0.503796
Var_126	1-oleoyl-2-linoleoyl-GPE (18:1/18:2)*	Lipid	Phosphatidylethanolamine (PE)	7825703		HMDB05349	9546753	0.645316	421	0.96874	1.0252	0.520087
Var_097	linoleoyl-docosahexaenoyl-glycerol (18:2/22:6) [2]*	Lipid	Diacylglycerol			HMDB07266		0.697921	455	0.969419	0.944315	0.500114
Var_697	threonate	Cofactors and Vitamins	Ascorbate and Aldarate Metabolism	133224	C01620	HMDB00943	151152	0.644447	420	0.96974	1.08405	0.440695
Var_214	1-palmitoyl-2-linoleoyl-GPC (16:0/18:2)	Lipid	Phosphatidylcholine (PC)	4450224		HMDB07973	5287971	0.703081	458	0.97019	0.99073	0.0837001
Var_296	4-guanidinobutanoate	Amino Acid	Guanidino and Acetamido Metabolism	486	C01035	HMDB03464	500	0.644283	419	0.971807	1.05625	0.252932
Var_630	pro-hydroxy-pro	Amino Acid	Urea cycle; Arginine and Proline Metabolism	9847785		HMDB06695	11673055	0.713154	462	0.97557	1.01378	0.0723373
Var_345	arabitol/xylitol	Carbohydrate	Pentose Metabolism		C01904		6912	0.712038	461	0.976156	1.0126	0.129858
Var_428	erythronate*	Carbohydrate	Aminosugar Metabolism	2061231		HMDB00613	2781043	0.711162	460	0.977075	1.00802	0.0844233
Var_179	1-(1-enyl-palmitoyl)-2-palmitoleoyl-GPC (P-16:0/16:1)*	Lipid	Plasmalogen	24767482		HMDB11207		0.710856	459	0.978783	1.00125	0.136068
Var_229	1-stearoyl-2-linoleoyl-GPE (18:0/18:2)*	Lipid	Phosphatidylethanolamine (PE)	7825699		HMDB08994	9546749	0.718664	463	0.980984	0.979807	0.220338
Var_134	3-hydroxypyridine sulfate	Xenobiotics	Chemical	16232314				0.720978	464	0.982022	0.992713	0.321978
Var_583	O-methylcatechol sulfate	Xenobiotics	Benzoate Metabolism	21078		HMDB60013	22473	0.870712	559	0.984418	0.996347	0.240408
Var_503	isoursodeoxycholate	Lipid	Secondary Bile Acid Metabolism	113205	C17662	HMDB00686	127601	0.869966	558	0.985338	1.14823	0.24717
Var_273	3-hydroxybutyrylcarnitine (2)	Lipid	Fatty Acid Metabolism(Acyl Carnitine)			HMDB13127		0.868997	557	0.986007	0.945527	0.683747
Var_133	3-hydroxyhexanoate	Lipid	Fatty Acid, Monohydroxy	133518			151492	0.880339	564	0.986479	0.991826	0.452103
Var_537	myo-inositol	Lipid	Inositol Metabolism	10239179	C00137	HMDB00211	892	0.882038	565	0.986633	0.99167	0.264094
Var_243	16a-hydroxy DHEA 3-sulfate	Lipid	Androgenic Steroids					0.868366	556	0.987063	1.05614	0.164356
Var_508	lactosyl-N-behenoyl-sphingosine (d18:1/22:0)*	Lipid	Sphingolipid Metabolism	24846893				0.87467	560	0.987128	0.993841	0.0887315
Var_522	linoleoyl-linoleoyl-glycerol (18:2/18:2) [1]*	Lipid	Diacylglycerol			HMDB07248		0.880161	563	0.988031	0.842696	0.715133
Var_673	sphingomyelin (d18:2/23:1)*	Lipid	Sphingolipid Metabolism					0.877196	561	0.988213	0.988687	0.0939908
Var_625	pregn steroid monosulfate C21H34O5S*	Lipid	Progestin Steroids	13465233				0.868175	555	0.988624	0.992878	0.210216
Var_362	bilirubin (E,E)*	Cofactors and Vitamins	Hemoglobin and Porphyrin Metabolism	4474753			5315454	0.893237	571	0.988662	1.0243	0.267251
Var_143	beta-citrylglutamate	Amino Acid	Glutamate Metabolism	19992713	C20775		72715786	0.865251	553	0.988859	0.943947	0.291298
Var_437	gamma-glutamyl-alpha-lysine	Peptide	Gamma-glutamyl Amino Acid	58747			65254	0.862211	551	0.988961	1.00918	0.108538
Var_123	taurocholate	Lipid	Primary Bile Acid Metabolism		C05122	HMDB00036	6675	0.904498	578	0.989002	1.00852	0.186516
Var_343	androstenediol (3beta,17beta) monosulfate (2)	Lipid	Androgenic Steroids					0.879672	562	0.98924	0.973487	0.271644
Var_550	N-acetylhistidine	Amino Acid	Histidine Metabolism	68142	C02997	HMDB32055	75619	0.867334	554	0.98945	1.00206	0.113851
Var_305	5-acetylamino-6-amino-3-methyluracil	Xenobiotics	Xanthine Metabolism	79659	C16366	HMDB04400	88299	0.864208	552	0.989456	1.07654	0.236447
Var_379	cerotoylcarnitine (C26)*	Lipid	Fatty Acid Metabolism(Acyl Carnitine)	35015992		HMDB06347		0.897231	573	0.989616	0.992453	0.132577
Var_329	adipoylcarnitine (C6-DC)	Lipid	Fatty Acid Metabolism(Acyl Carnitine)	28540385		HMDB61677	71296139	0.914534	584	0.989702	0.972354	0.201641
Var_239	10-undecenoate (11:1n1)	Lipid	Medium Chain Fatty Acid	10771160	C13910	HMDB33724	14891	0.898878	574	0.989706	0.999224	0.043962
Var_122	serotonin	Amino Acid	Tryptophan Metabolism	5013	C00780	HMDB00259	5202	0.903803	577	0.989954	0.878829	2.52927
Var_117	hexanoylglutamine	Lipid	Fatty Acid Metabolism (Acyl Glutamine)					0.861625	550	0.990085	1.12692	0.390568
Var_310	5-methyluridine (ribothymidine)	Nucleotide	Pyrimidine Metabolism, Uracil containing	393058		HMDB00884	445408	0.893037	570	0.990174	0.986827	0.287037
Var_450	gamma-glutamylvaline	Peptide	Gamma-glutamyl Amino Acid			HMDB11172	7015683	0.91655	585	0.990187	0.987125	0.0806703
Var_299	4-hydroxyhippurate	Xenobiotics	Benzoate Metabolism	133104		HMDB13678	151012	0.897018	572	0.99111	0.862827	0.289449
Var_391	creatine	Amino Acid	Creatine Metabolism	566	C00300	HMDB00064	586	0.889214	567	0.991152	0.995	0.0680208
Var_285	3-methylglutaconate	Amino Acid	Leucine, Isoleucine and Valine Metabolism	1267861		HMDB00522	1551553	0.914402	583	0.991255	0.983528	0.0852124
Var_113	carboxyethyl-GABA	Amino Acid	Glutamate Metabolism	2474		HMDB02201	2572	0.919204	586	0.99136	1.00868	0.250743
Var_337	andro steroid monosulfate C19H28O6S (1)*	Lipid	Androgenic Steroids		C04555	HMDB02759		0.892549	569	0.991373	1.10412	0.354417
Var_340	androstenediol (3beta,17beta) disulfate (1)	Lipid	Androgenic Steroids		C04295	HMDB03818	87120982	0.861194	549	0.991393	1.07777	0.255479
Var_703	trigonelline (N'-methylnicotinate)	Cofactors and Vitamins	Nicotinate and Nicotinamide Metabolism	5369	C01004	HMDB00875	5570	0.913058	582	0.991499	0.993572	0.0486131
Var_632	propionylcarnitine (C3)	Lipid	Fatty Acid Metabolism (also BCAA Metabolism)	96904	C03017	HMDB00824	107738	0.903716	576	0.991577	0.980651	0.216781
Var_469	glycodeoxycholate	Lipid	Secondary Bile Acid Metabolism		C05464	HMDB00631	3035026	0.911608	581	0.991629	0.960677	0.174081
Var_278	3-hydroxyoctanoate	Lipid	Fatty Acid, Monohydroxy	24791		HMDB01954	26613	0.891286	568	0.991713	1.00078	0.170931
Var_324	acetylcarnitine (C2)	Lipid	Fatty Acid Metabolism(Acyl Carnitine)	5406074	C02571	HMDB00201	1	0.908616	579	0.991788	0.96368	0.399004
Var_119	linoleoyl-linolenoyl-glycerol (18:2/18:3) [2]*	Lipid	Diacylglycerol			HMDB07250		0.921291	587	0.991918	1.1067	0.313038
Var_344	androsterone sulfate	Lipid	Androgenic Steroids	19988780		HMDB02759	159663	0.910483	580	0.992113	0.994695	0.162085
Var_342	androstenediol (3beta,17beta) monosulfate (1)	Lipid	Androgenic Steroids			HMDB03818	13847309	0.903001	575	0.992516	0.999069	0.164427
Var_373	carotene diol (2)	Cofactors and Vitamins	Vitamin A Metabolism					0.98157	625	0.992563	1.00102	0.163402
Var_318	6-hydroxyindole sulfate	Xenobiotics	Chemical					0.86074	548	0.992679	0.93216	0.22156
Var_467	glycocholate	Lipid	Primary Bile Acid Metabolism	9734	C01921	HMDB00138	10140	0.889028	566	0.992695	1.02556	0.125812
Var_384	cinnamoylglycine	Xenobiotics	Food Component/Plant	618829		HMDB11621	709625	0.85298	543	0.992787	1.03249	0.254338
Var_506	kynurenine	Amino Acid	Tryptophan Metabolism	141580	C00328	HMDB00684	161166	0.98033	624	0.992898	1.00833	0.0804107
Var_463	glycerophosphorylcholine (GPC)	Lipid	Phospholipid Metabolism	571409	C00670	HMDB00086	71920	0.993093	632	0.993093	0.636213	0.997881
Var_578	N6-acetyllysine	Amino Acid	Lysine Metabolism	83801	C02727	HMDB00206	92832	0.855115	544	0.993442	1.0341	0.357842
Var_479	glycosyl-N-palmitoyl-sphingosine (d18:1/16:0)	Lipid	Ceramides					0.859876	547	0.993495	0.99165	0.0996218
Var_333	alpha-hydroxyisocaproate	Amino Acid	Leucine, Isoleucine and Valine Metabolism	75520	C03264	HMDB00746	83697	0.858543	546	0.993771	1.0073	0.304581
Var_275	3-hydroxyhippurate	Xenobiotics	Benzoate Metabolism	396603		HMDB06116	450268	0.924785	588	0.993987	0.957424	0.26241
Var_601	p-cresol sulfate	Xenobiotics	Benzoate Metabolism	3806480		HMDB11635	4615423	0.937428	596	0.994051	1.00269	0.0939588
Var_211	1-palmitoyl-2-dihomo-linolenoyl-GPC (16:0/20:3n3 or 6)*	Lipid	Phosphatidylcholine (PC)					0.973672	619	0.994121	0.99986	0.0462641
Var_177	1-(1-enyl-palmitoyl)-2-oleoyl-GPC (P-16:0/18:1)*	Lipid	Plasmalogen					0.852647	542	0.99423	0.984623	0.140496
Var_552	N-acetylmethionine	Amino Acid	Methionine, Cysteine, SAM and Taurine Metabolism	395338	C02712	HMDB11745	448580	0.733089	466	0.994233	0.938675	0.309643
Var_139	7-methylurate	Xenobiotics	Xanthine Metabolism	62375	C16355	HMDB11107	69160	0.992801	631	0.994375	1.02566	0.258832
Var_672	sphingomyelin (d18:2/23:0, d18:1/23:1, d17:1/24:1)*	Lipid	Sphingolipid Metabolism					0.980303	623	0.994465	0.998141	0.0406412
Var_096	glutamate, gamma-methyl ester	Amino Acid	Glutamate Metabolism	66546		HMDB61715	68662	0.986731	627	0.9946	1.02691	0.533324
Var_584	O-sulfo-L-tyrosine	Xenobiotics	Chemical	448617			514186	0.985265	626	0.994709	0.992404	0.275149
Var_101	O-acetylhomoserine	Amino Acid	Glycine, Serine and Threonine Metabolism	388506	C01077		439389	0.978983	622	0.994723	1.00621	0.43722
Var_316	5alpha-pregnan-3beta,20alpha-diol monosulfate (2)	Lipid	Progestin Steroids					0.73202	465	0.994917	1.02887	0.225352
Var_490	homoserine	Amino Acid	Glycine, Serine and Threonine Metabolism	12126	C00263	HMDB00719	12647	0.939847	597	0.994947	1.02699	0.790631
Var_466	glycochenodeoxycholate sulfate	Lipid	Primary Bile Acid Metabolism					0.977653	621	0.99497	1.01986	0.0843613
Var_184	1-(1-enyl-stearoyl)-2-linoleoyl-GPE (P-18:0/18:2)*	Lipid	Plasmalogen	24769261		HMDB11376		0.937023	595	0.995292	0.99517	0.146898
Var_472	glycolithocholate sulfate*	Lipid	Secondary Bile Acid Metabolism	65188	C11301	HMDB02639	72222	0.990596	629	0.995321	0.969394	0.152198
Var_319	7-alpha-hydroxy-3-oxo-4-cholestenoate (7-Hoca)	Lipid	Sterol	2338765	C17337	HMDB12458	3081085	0.852022	541	0.995338	0.999723	0.181183
Var_505	kynurenate	Amino Acid	Tryptophan Metabolism	3712	C01717	HMDB00715	3845	0.973453	618	0.995506	0.992771	0.159622
Var_689	succinylcarnitine (C4-DC)	Energy	TCA Cycle	28639166		HMDB61717	71464481	0.858502	545	0.995547	1.00425	0.133821
Var_487	hippurate	Xenobiotics	Benzoate Metabolism	451	C01586	HMDB00714	464	0.992641	630	0.995792	0.973615	0.11701
Var_534	methionine sulfoxide	Amino Acid	Methionine, Cysteine, SAM and Taurine Metabolism	139840	C02989	HMDB02005	158980	0.989713	628	0.996017	1.00529	0.20874
Var_287	3-methylhistidine	Amino Acid	Histidine Metabolism	58494	C01152	HMDB00479	64969	0.942605	598	0.996197	0.955737	0.302836
Var_367	C-glycosyltryptophan	Amino Acid	Tryptophan Metabolism	9157171			10981970	0.972748	617	0.996397	0.998109	0.238088
Var_427	erythritol	Xenobiotics	Food Component/Plant	13835932	C00503	HMDB02994	222285	0.928606	589	0.996399	0.995388	0.225103
Var_702	tricosanoyl sphingomyelin (d18:1/23:0)*	Lipid	Sphingolipid Metabolism			HMDB12105		0.934968	593	0.996459	0.998472	0.072745
Var_154	hydantoin-5-propionic acid	Amino Acid	Histidine Metabolism	761	C05565	HMDB01212	782	0.977611	620	0.996533	0.978227	0.324437
Var_105	thymol sulfate	Xenobiotics	Food Component/Plant	10709958	C09908	HMDB01878		0.851533	540	0.996609	1.01713	0.181522
Var_665	sphingomyelin (d18:1/22:2, d18:2/22:1, d16:1/24:2)*	Lipid	Sphingolipid Metabolism					0.936795	594	0.996725	1.00737	0.118709
Var_202	1-myristoyl-2-palmitoyl-GPC (14:0/16:0)	Lipid	Phosphatidylcholine (PC)	114798		HMDB07869	129657	0.960823	609	0.99711	1.00788	0.108175
Var_599	orotidine	Nucleotide	Pyrimidine Metabolism, Orotate containing	83729		HMDB00788	92751	0.932493	591	0.997184	0.982688	0.138487
Var_188	1-arachidonoyl-GPE (20:4n6)*	Lipid	Lysophospholipid	21403171		HMDB11517	42607465	0.930951	590	0.997222	0.99181	0.165886
Var_663	sphingomyelin (d18:1/21:0, d17:1/22:0, d16:1/23:0)*	Lipid	Sphingolipid Metabolism					0.972191	616	0.997443	0.995788	0.047858
Var_116	glycerophosphoethanolamine	Lipid	Phospholipid Metabolism	110410	C01233	HMDB00114	123874	0.800184	507	0.997468	1.01308	1.398
Var_473	glycosyl ceramide (d18:1/20:0, d16:1/22:0)*	Lipid	Ceramides					0.953323	604	0.997517	0.995827	0.0482411
Var_150	EDTA	Xenobiotics	Chemical	5826	C00284	HMDB15109	6049	0.970723	615	0.997556	1.00125	0.0766955
Var_481	glycosyl-N-tricosanoyl-sphingadienine (d18:2/23:0)*	Lipid	Ceramides					0.934509	592	0.997652	1.00506	0.139614
Var_643	S-methylcysteine	Amino Acid	Methionine, Cysteine, SAM and Taurine Metabolism	22826		HMDB02108	24417	0.969649	614	0.998075	1.03246	0.416812
Var_562	N-formylmethionine	Amino Acid	Methionine, Cysteine, SAM and Taurine Metabolism	388809	C03145	HMDB01015	439750	0.960249	608	0.998154	0.986968	0.138443
Var_253	2-hydroxybutyrate/2-hydroxyisobutyrate	Amino Acid	Glutathione Metabolism					0.94922	601	0.998181	1.00835	0.090596
Var_264	2-piperidinone	Xenobiotics	Food Component/Plant	12144		HMDB11749	12665	0.950806	602	0.998189	1.00112	0.115813
Var_221	1-palmitoyl-2-stearoyl-GPC (16:0/18:0)	Lipid	Phosphatidylcholine (PC)	24766643		HMDB07970		0.848257	537	0.998321	0.971876	0.133402
Var_674	sphingomyelin (d18:2/24:1, d18:1/24:2)*	Lipid	Sphingolipid Metabolism					0.851439	539	0.998348	0.995726	0.053063
Var_659	sphingomyelin (d18:1/19:0, d19:1/18:0)*	Lipid	Sphingolipid Metabolism					0.849929	538	0.998429	1.0004	0.135947
Var_520	linoleoyl-arachidonoyl-glycerol (18:2/20:4) [1]*	Lipid	Diacylglycerol			HMDB07257		0.797869	505	0.998522	0.97573	0.180089
Var_251	2-aminophenol sulfate	Xenobiotics	Chemical	158022		HMDB61116	181670	0.95291	603	0.998739	1.00755	0.276625
Var_360	beta-cryptoxanthin	Cofactors and Vitamins	Vitamin A Metabolism	4904571		HMDB33844	6384256	0.94831	600	0.998887	1.00239	0.107995
Var_115	flavin adenine dinucleotide (FAD)	Cofactors and Vitamins	Riboflavin Metabolism	559059	C00016	HMDB01248	643975	0.787135	498	0.998934	0.960763	0.284162
Var_713	xanthurenate	Amino Acid	Tryptophan Metabolism	5497	C02470	HMDB00881	5699	0.738154	467	0.998958	0.951602	0.24256
Var_332	allantoin	Nucleotide	Purine Metabolism, (Hypo)Xanthine/Inosine containing	199	C02350	HMDB00462	204	0.969087	613	0.999124	0.98348	0.206846
Var_206	1-palmitoleoyl-2-linolenoyl-GPC (16:1/18:3)*	Lipid	Phosphatidylcholine (PC)	24766677		HMDB08008		0.959634	607	0.999157	0.996919	0.145406
Var_302	4-methylcatechol sulfate	Xenobiotics	Benzoate Metabolism					0.800072	506	0.999299	0.899177	0.200478
Var_269	3-carboxy-4-methyl-5-propyl-2-furanpropanoate (CMPF)	Lipid	Fatty Acid, Dicarboxylate	110498		HMDB61112	123979	0.967742	612	0.999368	1.11481	0.288413
Var_338	androstenediol (3alpha, 17alpha) monosulfate (2)	Lipid	Androgenic Steroids					0.797064	504	0.999494	1.0003	0.202209
Var_547	N-acetylcarnosine	Amino Acid	Histidine Metabolism	8079136		HMDB12881	9903482	0.792458	501	0.999667	1.00769	0.321344
Var_444	gamma-glutamylleucine	Peptide	Gamma-glutamyl Amino Acid	133115		HMDB11171	151023	0.847821	536	0.99967	0.96994	0.272548
Var_120	N-acetylproline	Amino Acid	Urea cycle; Arginine and Proline Metabolism	285677			322640	0.965006	610	0.999809	1.00564	0.204813
Var_295	4-ethylphenylsulfate	Xenobiotics	Benzoate Metabolism		C13637			0.795892	503	1.00001	0.946012	0.185406
Var_640	ribitol	Carbohydrate	Pentose Metabolism	10254628	C00474	HMDB00508	6912	0.947825	599	1.00004	0.978121	0.185568
Var_418	dopamine 3-O-sulfate	Amino Acid	Tyrosine Metabolism	108936	C13690	HMDB06275	122136	0.789658	499	1.00013	0.953779	0.448269
Var_231	1-stearoyl-2-oleoyl-GPC (18:0/18:1)	Lipid	Phosphatidylcholine (PC)	24766704		HMDB08038		0.786582	497	1.00024	0.994756	0.0935422
Var_307	5-bromotryptophan	Amino Acid	Tryptophan Metabolism	87339			96735	0.959191	606	1.00034	1.00472	0.24765
Var_138	5alpha-androstan-3beta,17beta-diol monosulfate (2)	Lipid	Androgenic Steroids					0.957729	605	1.00047	1.01045	0.254531
Var_162	palmitoyl-linoleoyl-glycerol (16:0/18:2) [1]*	Lipid	Diacylglycerol	7822645		HMDB07103	9543695	0.967275	611	1.00052	1.0999	1.37954
Var_627	pregnen-diol disulfate C21H34O8S2*	Lipid	Progestin Steroids					0.80429	508	1.00061	1.0315	0.173322
Var_377	ceramide (d18:1/20:0, d16:1/22:0, d20:1/18:0)*	Lipid	Ceramides					0.847078	535	1.00066	0.993773	0.0740028
Var_267	3-(4-hydroxyphenyl)lactate	Amino Acid	Tyrosine Metabolism	9010	C03672	HMDB00755	9378	0.845938	534	1.00119	0.969113	0.291619
Var_431	formiminoglutamate	Amino Acid	Histidine Metabolism	388370	C00439	HMDB00854	439233	0.806385	509	1.00125	0.987408	0.207619
Var_681	stearidonate (18:4n3)	Lipid	Polyunsaturated Fatty Acid (n3 and n6)	4471933	C16300	HMDB06547	5312508	0.785801	496	1.00126	0.905217	0.454327
Var_130	2-hydroxyhippurate (salicylurate)	Xenobiotics	Benzoate Metabolism	9835	C07588	HMDB00840	10253	0.792372	500	1.00156	0.979956	0.384837
Var_277	3-hydroxylaurate	Lipid	Fatty Acid, Monohydroxy	85026		HMDB00387	94216	0.795802	502	1.00189	0.987181	0.189507
Var_198	1-methylhistidine	Amino Acid	Histidine Metabolism	83153	C01152	HMDB00001	92105	0.785155	495	1.00246	1.03283	0.232985
Var_266	21-hydroxypregnenolone disulfate	Lipid	Pregnenolone Steroids	118625			134595	0.845555	533	1.00261	1.01068	0.147237
Var_325	aconitate [cis or trans]	Energy	TCA Cycle					0.783842	494	1.00281	1.02266	0.270344
Var_369	caprate (10:0)	Lipid	Medium Chain Fatty Acid	2863	C01571	HMDB00511	2969	0.84508	532	1.00393	1.00416	0.109141
Var_111	behenoylcarnitine (C22)*	Lipid	Fatty Acid Metabolism(Acyl Carnitine)	28639204				0.745222	469	1.00422	0.997044	0.15687
Var_626	pregnanediol-3-glucuronide	Lipid	Progestin Steroids	110346		HMDB10318	123796	0.842402	530	1.00452	1.02614	0.18381
Var_690	sulfate*	Xenobiotics	Chemical	1086	C00059	HMDB01448	1118	0.783827	493	1.00482	1.0026	0.12598
Var_602	palmitate (16:0)	Lipid	Long Chain Fatty Acid	960	C00249	HMDB00220	985	0.744089	468	1.00484	0.990997	0.108907
Var_536	methylsuccinate	Amino Acid	Leucine, Isoleucine and Valine Metabolism	9922		HMDB01844	10349	0.841456	529	1.00529	0.993606	0.218666
Var_099	N-acetyltyrosine	Amino Acid	Tyrosine Metabolism	61606		HMDB00866	68310	0.844839	531	1.00553	1.01515	0.322384
Var_540	myristoleoylcarnitine (C14:1)*	Lipid	Fatty Acid Metabolism(Acyl Carnitine)	34999520			90659872	0.840937	528	1.00658	0.992644	0.0777608
Var_579	N6-carbamoylthreonyladenosine	Nucleotide	Purine Metabolism, Adenine containing	141829		HMDB41623	161466	0.777295	488	1.00666	0.98453	0.153619
Var_289	3-phenylpropionate (hydrocinnamate)	Xenobiotics	Benzoate Metabolism	10181339	C05629	HMDB00764	107	0.783762	492	1.00678	0.998591	0.164392
Var_203	1-oleoyl-2-docosahexaenoyl-GPC (18:1/22:6)*	Lipid	Phosphatidylcholine (PC)	24766785		HMDB08123		0.7488	470	1.0069	1.00777	0.149231
Var_174	1-(1-enyl-palmitoyl)-2-arachidonoyl-GPE (P-16:0/20:4)*	Lipid	Plasmalogen	24769238		HMDB11352		0.81327	510	1.00782	1.0113	0.291748
Var_705	tryptophan	Amino Acid	Tryptophan Metabolism	6066	C00078	HMDB00929	6305	0.840428	527	1.00788	0.9902	0.106219
Var_161	oleoyl-linolenoyl-glycerol (18:1/18:3) [2]*	Lipid	Diacylglycerol			HMDB07220		0.775497	486	1.00846	0.941684	0.653695
Var_140	9,10-DiHOME	Lipid	Fatty Acid, Dihydroxy	8142232	C14828	HMDB04704	9966640	0.777128	487	1.00851	1.05776	0.734098
Var_390	cortisone	Lipid	Corticosteroids	361685	C00762	HMDB02802	222786	0.783673	491	1.00872	1.00004	0.198401
Var_129	17alpha-hydroxypregnenolone 3-sulfate	Lipid	Pregnenolone Steroids	134824		HMDB00416	152971	0.781019	489	1.00941	1.05438	0.258711
Var_339	androstenediol (3alpha, 17alpha) monosulfate (3)	Lipid	Androgenic Steroids					0.840376	526	1.00973	1.03432	0.20816
Var_424	epiandrosterone sulfate	Lipid	Androgenic Steroids	21403101			9929317	0.782984	490	1.00989	0.959894	0.192516
Var_401	dehydroisoandrosterone sulfate (DHEA-S)	Lipid	Androgenic Steroids	12074	C04555	HMDB01032	12594	0.775404	485	1.01042	0.976009	0.153376
Var_451	gamma-tocopherol/beta-tocopherol	Cofactors and Vitamins	Tocopherol Metabolism					0.766153	479	1.01087	0.977426	0.240833
Var_155	hyocholate	Lipid	Secondary Bile Acid Metabolism	21403098	C17649	HMDB00760	92805	0.836534	523	1.01088	0.987742	0.302665
Var_405	dihomo-linolenate (20:3n3 or n6)	Lipid	Polyunsaturated Fatty Acid (n3 and n6)	4471954	C03242	HMDB02925	5280581	0.838181	524	1.01094	0.987808	0.304131
Var_692	taurine	Amino Acid	Methionine, Cysteine, SAM and Taurine Metabolism	1091	C00245	HMDB00251	1123	0.817465	511	1.01103	1.30515	0.783841
Var_594	oleoyl-oleoyl-glycerol (18:1/18:1) [2]*	Lipid	Diacylglycerol			HMDB07218		0.840266	525	1.01152	1.00353	0.0983156
Var_212	1-palmitoyl-2-docosahexaenoyl-GPC (16:0/22:6)	Lipid	Phosphatidylcholine (PC)	4946007		HMDB07991	6441886	0.819671	512	1.01178	0.999044	0.081979
Var_341	androstenediol (3beta,17beta) disulfate (2)	Lipid	Androgenic Steroids		C04295	HMDB03818	87120982	0.76528	478	1.01184	1.01844	0.154261
Var_242	15-methylpalmitate	Lipid	Fatty Acid, Branched				17903417	0.757366	473	1.01196	1.01234	0.160497
Var_290	3beta,7alpha-dihydroxy-5-cholestenoate	Lipid	Sterol	2338764	C17335		3081084	0.775061	484	1.01206	0.96741	0.321086
Var_108	3-methyl catechol sulfate (1)	Xenobiotics	Benzoate Metabolism					0.773858	483	1.01258	1.02902	0.157749
Var_298	4-hydroxychlorothalonil	Xenobiotics	Chemical	31530			34217	0.836472	522	1.01274	1.00657	0.160272
Var_225	1-stearoyl-2-arachidonoyl-GPE (18:0/20:4)	Lipid	Phosphatidylethanolamine (PE)	4451158		HMDB09003	5289133	0.75658	472	1.01305	0.964048	0.195937
Var_283	3-methyl-2-oxovalerate	Amino Acid	Leucine, Isoleucine and Valine Metabolism	46	C00671	HMDB03736	47	0.764819	477	1.01335	1.00395	0.19657
Var_218	1-palmitoyl-2-oleoyl-GPE (16:0/18:1)	Lipid	Phosphatidylethanolamine (PE)	4446615		HMDB05320	5283496	0.755372	471	1.01358	1.01248	0.376903
Var_165	taurodeoxycholate	Lipid	Secondary Bile Acid Metabolism	2015539	C05463	HMDB00896	2733768	0.773631	482	1.01439	1.02672	0.234095
Var_193	1-linoleoyl-2-linolenoyl-GPC (18:2/18:3)*	Lipid	Phosphatidylcholine (PC)	24766802		HMDB08141		0.836349	521	1.01453	0.964157	0.145496
Var_399	cytidine	Nucleotide	Pyrimidine Metabolism, Cytidine containing	5940	C00475	HMDB00089	6175	0.831722	518	1.01477	0.771078	0.6144
Var_675	sphingomyelin (d18:2/24:2)*	Lipid	Sphingolipid Metabolism					0.764307	476	1.01479	0.988159	0.143553
Var_135	3-methylglutarate/2-methylglutarate	Lipid	Fatty Acid, Dicarboxylate	11781		HMDB00752		0.763651	475	1.01606	0.910772	0.610135
Var_374	catechol sulfate	Xenobiotics	Benzoate Metabolism	2341024		HMDB59724	3083879	0.836039	520	1.01611	0.98439	0.215187
Var_609	palmitoyl-linoleoyl-glycerol (16:0/18:2) [2]*	Lipid	Diacylglycerol			HMDB07103		0.77341	481	1.01621	1.01842	0.275658
Var_249	2-aminoheptanoate	Lipid	Fatty Acid, Amino	198338			227939	0.76249	474	1.01665	0.994965	0.17588
Var_633	pseudouridine	Nucleotide	Pyrimidine Metabolism, Uracil containing	21403010	C02067	HMDB00767	15047	0.831681	517	1.01668	1.03356	0.292755
Var_668	sphingomyelin (d18:2/14:0, d18:1/14:1)*	Lipid	Sphingolipid Metabolism					0.772406	480	1.017	0.998019	0.0772059
Var_671	sphingomyelin (d18:2/21:0, d16:2/23:0)*	Lipid	Sphingolipid Metabolism					0.835984	519	1.018	0.994591	0.115651
Var_180	1-(1-enyl-palmitoyl)-2-palmitoyl-GPC (P-16:0/16:0)*	Lipid	Plasmalogen	9322076		HMDB11206	11146967	0.826559	513	1.01829	0.994882	0.13748
Var_527	maleate	Lipid	Fatty Acid, Dicarboxylate	392248	C01384	HMDB00176	444266	0.831393	516	1.0183	1.0262	0.199115
Var_095	arabinose	Carbohydrate	Pentose Metabolism	59687	C00216	HMDB00646	66308	0.830194	515	1.0188	0.988492	0.301561
Var_328	adipate	Lipid	Fatty Acid, Dicarboxylate	191	C06104	HMDB00448	196	0.830191	514	1.02078	0.991406	0.374629

## Sheet: Pathway Enrichment
KEGG Pathway	Total	Expected	Hits	Raw p	-log10(p)	Holm adjust	FDR	Impact
D-Arginine and D-Ornithine metabolism	8	0.043207	2	0.00074055	7.2081	0.059244	0.059244	0.57143
Propanoate metabolism	35	0.18903	2	0.014493	4.2341	1	0.57972	0.0625
Phenylalanine, tyrosine and tryptophan biosynthesis	27	0.14582	1	0.13672	1.9898	1	1	0
Valine, leucine and isoleucine biosynthesis	27	0.14582	1	0.13672	1.9898	1	1	0.03704
Glycolysis or Gluconeogenesis	31	0.16743	1	0.15544	1.8615	1	1	0.02326
Pyruvate metabolism	32	0.17283	1	0.16006	1.8322	1	1	0.05263
Ubiquinone and other terpenoid-quinone biosynthesis	36	0.19443	1	0.17831	1.7242	1	1	0.05128
Glutathione metabolism	38	0.20523	1	0.1873	1.675	1	1	0.01613
Galactose metabolism	41	0.22144	1	0.20061	1.6064	1	1	0.01724
Glycine, serine and threonine metabolism	48	0.25924	1	0.23089	1.4658	1	1	0
Cysteine and methionine metabolism	56	0.30245	1	0.2642	1.331	1	1	0
Pyrimidine metabolism	60	0.32405	1	0.28035	1.2717	1	1	0.02062
Aminoacyl-tRNA biosynthesis	75	0.40507	1	0.33805	1.0846	1	1	0.01613
Tyrosine metabolism	76	0.41047	1	0.34174	1.0737	1	1	0.04444
Arginine and proline metabolism	77	0.41587	1	0.34541	1.063	1	1	0.1068
Purine metabolism	92	0.49688	1	0.39826	0.92066	1	1	0.00714

## Sheet: ChemRICH Input
Compound Name	InChiKeys	Pubchem ID	SMILES	pvalue	foldchange
acetylcarnitine (C2)	RDHQFKQIGNGIED-UHFFFAOYSA-N	1	CC(=O)OC(CC(=O)[O-])C[N+](C)(C)C	0.908616	0.96368
2-hydroxyglutarate	HWXBTNAVRSUOJR-UHFFFAOYSA-N	43	C(CC(=O)O)C(C(=O)O)O	0.132122	1.19756
tartronate (hydroxymalonate)	ROBFUDYVXSDBQM-UHFFFAOYSA-N	45	C(C(=O)O)(C(=O)O)O	0.196144	0.913296
3-methyl-2-oxovalerate	JVQYSWDUAOAHFM-UHFFFAOYSA-N	47	CCC(C)C(=O)C(=O)O	0.764819	1.00395
3-methyl-2-oxobutyrate	QHKABHOOEWYVLI-UHFFFAOYSA-N	49	CC(C)C(=O)C(=O)O	0.6697	0.974728
alpha-ketoglutarate	KPGXRSRHYNQIFN-UHFFFAOYSA-N	51	C(CC(=O)O)C(=O)C(=O)O	0.244517	0.95015
alpha-ketobutyrate	TYEYBOSBBBHJIV-UHFFFAOYSA-N	58	CCC(=O)C(=O)O	3.81745e-05	0.610728
4-methyl-2-oxopentanoate	BKAJNAXTPSGJCU-UHFFFAOYSA-N	70	CC(C)CC(=O)C(=O)O	0.214976	0.915949
3-hydroxyisobutyrate	DBXBTMSZEOQQDU-UHFFFAOYSA-N	87	CC(CO)C(=O)O	0.28952	0.952701
3-(3-hydroxyphenyl)propionate	QVWAEZJXDYOKEH-UHFFFAOYSA-N	91	C1=CC(=CC(=C1)O)CCC(=O)O	0.193121	1.07229
acetoacetate	WDJHALXBUFZDSR-UHFFFAOYSA-N	96	CC(=O)CC(=O)O	0.00229486	0.813265
3-phenylpropionate (hydrocinnamate)	XMIIGOLPHOKFCH-UHFFFAOYSA-N	107	C1=CC=C(C=C1)CCC(=O)O	0.783762	0.998591
deoxycarnitine	JHPNVNIEXXLNTR-UHFFFAOYSA-O	134	C[N+](C)(C)CCCC(=O)O	0.391427	0.985808
adenine	GFFGJBXGBJISGV-UHFFFAOYSA-N	190	C1=NC2=C(N1)C(=NC=N2)N	0.0437386	0.591454
adipate	WNLRTRBMVRJNCN-UHFFFAOYSA-N	196	C(CCC(=O)O)CC(=O)O	0.830191	0.991406
allantoin	POJWUDADGALRAB-UHFFFAOYSA-N	204	C1(C(=O)NC(=O)N1)NC(=O)N	0.969087	0.98348
arginine	ODKSFYDXXFIFQN-UHFFFAOYSA-N	232	C(CC(C(=O)O)N)CN=C(N)N	9.38899e-06	0.671653
beta-alanine	UCMIRNVEIXFBKS-UHFFFAOYSA-N	239	C(CN)C(=O)O	0.524562	0.977359
betaine	KWIUHFFTVRNATP-UHFFFAOYSA-N	247	C[N+](C)(C)CC(=O)[O-]	0.368659	0.983261
choline	OEYIOHPDSNJKLS-UHFFFAOYSA-N	305	C[N+](C)(C)CCO	0.0285188	1.09329
citrate	KRKNYBCHXYNGOX-UHFFFAOYSA-N	311	C(C(=O)O)C(CC(=O)O)(C(=O)O)O	0.315725	0.932092
salicylate	YGSDEFSMJLZEOE-UHFFFAOYSA-N	338	C1=CC=C(C(=C1)C(=O)O)O	0.129173	0.937178
caprylate (8:0)	WWZKQHOCKIZLMA-UHFFFAOYSA-N	379	CCCCCCCC(=O)O	0.15823	1.04497
3-hydroxybutyrate (BHBA)	WHBMMWSBFZVSSR-UHFFFAOYSA-N	441	CC(CC(=O)O)O	0.0541728	0.933795
palmitoylcarnitine (C16)	XOMRRQXKHMYMOC-UHFFFAOYSA-N	461	CCCCCCCCCCCCCCCC(=O)OC(CC(=O)[O-])C[N+](C)(C)C	0.00382675	1.15962
hippurate	QIAFMBKCNZACKA-UHFFFAOYSA-N	464	C1=CC=C(C=C1)C(=O)NCC(=O)O	0.992641	0.973615
2-aminoadipate	OYIFNHCXNCRBQI-UHFFFAOYSA-N	469	C(CC(C(=O)O)N)CC(=O)O	0.412652	1.05224
methylmalonate (MMA)	ZIYVHBGGAOATLY-UHFFFAOYSA-N	487	CC(C(=O)O)C(=O)O	0.36704	0.912937
4-guanidinobutanoate	TUHVEAJXIMEOSA-UHFFFAOYSA-N	500	C(CC(=O)O)CN=C(N)N	0.644283	1.05625
malate	BJEPYKJPYRNKOW-UHFFFAOYSA-N	525	C(C(C(=O)O)O)C(=O)O	0.682577	1.03199
N-methylproline	CWLQUGTUXBXTLF-UHFFFAOYSA-N	557	CN1CCCC1C(=O)O	0.225123	1.00963
2-oxoarginine*	ARBHXJXXVVHMET-UHFFFAOYSA-N	558	C(CC(=O)C(=O)O)CN=C(N)N	0.398748	0.91855
creatine	CVSVTCORWBXHQV-UHFFFAOYSA-N	586	CN(CC(=O)O)C(=N)N	0.889214	0.995
creatinine	DDRJAANPRJIHGJ-UHFFFAOYSA-N	588	CN1CC(=O)N=C1N	0.308675	0.983102
4-hydroxy-2-oxoglutaric acid	WXSKVKPSMAHCSG-UHFFFAOYSA-N	599	C(C(C(=O)O)O)C(=O)C(=O)O	0.127483	0.815713
glutamate	WHUUTDBJXJRKMK-UHFFFAOYSA-N	611	C(CC(=O)O)C(C(=O)O)N	0.0511109	1.13985
lactate	JVTAAEKCZFNVCJ-UHFFFAOYSA-N	612	CC(C(=O)O)O	2.75666e-05	1.40248
dihydroorotate	UFIVEPVSAGBUSI-UHFFFAOYSA-N	648	C1C(NC(=O)NC1=O)C(=O)O	8.68091e-05	1.43841
dimethylglycine	FFDGPVCHZBVARC-UHFFFAOYSA-N	673	CN(C)CC(=O)O	0.525857	0.988602
2,3-dihydroxyisovalerate	JTEYKUFKXGDTEU-UHFFFAOYSA-N	677	CC(C)(C(C(=O)O)O)O	0.547972	0.974348
glutarate (pentanedioate)	JFCQEDHGNNZCLN-UHFFFAOYSA-N	743	C(CC(=O)O)CC(=O)O	0.647114	1.09272
glycine	DHMQDGOQFOQNFH-UHFFFAOYSA-N	750	C(C(=O)O)N	0.583901	1.00857
glycerate	RBNPOMFGQQGHHO-UHFFFAOYSA-N	752	C(C(C(=O)O)O)O	0.333568	1.03148
glycerol	PEDCQBHIVMGVHV-UHFFFAOYSA-N	753	C(C(CO)O)O	0.351545	0.929531
glycerol 3-phosphate	AWUCVROLDVIAJX-UHFFFAOYSA-N	754	C(C(COP(=O)(O)O)O)O	0.445929	1.10736
guanidinoacetate	BPMFZUMJYQTVII-UHFFFAOYSA-N	763	C(C(=O)O)N=C(N)N	0.386947	0.962678
hydantoin-5-propionic acid	VWFWNXQAMGDPGG-UHFFFAOYSA-N	782	C(CC(=O)O)C1C(=O)NC(=O)N1	0.977611	0.978227
hypoxanthine	FDGQSTZJBFJUBT-UHFFFAOYSA-N	790	C1=NC2=C(N1)C(=O)N=CN2	0.000179462	1.77964
indoleacetate	SEOVTRFCIGRIMH-UHFFFAOYSA-N	802	C1=CC=C2C(=C1)C(=CN2)CC(=O)O	0.357326	1.05299
pipecolate	HXEACLLIILLPRG-UHFFFAOYSA-N	849	C1CCNC(C1)C(=O)O	0.144615	0.98194
malonate	OFOBLEOULBTSOW-UHFFFAOYSA-N	867	C(C(=O)O)C(=O)O	0.547372	1.02905
myo-inositol	CDAISMWEOUEBRE-UHFFFAOYSA-N	892	C1(C(C(C(C(C1O)O)O)O)O)O	0.882038	0.99167
nicotinamide	DFPAKSUCGFBDDF-UHFFFAOYSA-N	936	C1=CC(=CN=C1)C(=O)N	0.432288	0.883106
orotate	PXQPEWDEAKTCGB-UHFFFAOYSA-N	967	C1=C(NC(=O)NC1=O)C(=O)O	0.366771	1.09129
oxalate (ethanedioate)	MUBZPKHOEPUJKR-UHFFFAOYSA-N	971	C(=O)(C(=O)O)O	0.441888	1.11069
4-hydroxyphenylpyruvate	KKADPXVIOXHVKN-UHFFFAOYSA-N	979	C1=CC(=CC=C1CC(=O)C(=O)O)O	0.00138262	0.705074
palmitate (16:0)	IPCSVZSSVZVIGE-UHFFFAOYSA-N	985	CCCCCCCCCCCCCCCC(=O)O	0.744089	0.990997
phenylpyruvate	BTNMPGBKDVTSJY-UHFFFAOYSA-N	997	C1=CC=C(C=C1)CC(=O)C(=O)O	0.239828	0.870097
choline phosphate	YHHSONZFOIEMCP-UHFFFAOYSA-O	1014	C[N+](C)(C)CCOP(=O)(O)O	0.518329	0.968581
phosphoethanolamine	SUHOOTKUPISOBE-UHFFFAOYSA-N	1015	C(COP(=O)(O)O)N	0.443336	0.80656
pyridoxal	RADKZDMFGJYCBB-UHFFFAOYSA-N	1050	CC1=NC=C(C(=C1O)C=O)CO	0.383456	0.978417
pyruvate	LCTONWCANYUPML-UHFFFAOYSA-N	1060	CC(=O)C(=O)O	0.0661831	0.838443
phosphate	NBIIXXVUZAFLBC-UHFFFAOYSA-K	1061	[O-]P(=O)([O-])[O-]	0.276693	0.848059
quinolinate	GJAWHXHKYYXBSV-UHFFFAOYSA-N	1066	C1=CC(=C(N=C1)C(=O)O)C(=O)O	0.404467	0.940588
sarcosine	FSYKKLYZXJSNPZ-UHFFFAOYSA-N	1088	CNCC(=O)O	0.133511	0.932621
spermidine	ATHGHQPFGPMSJY-UHFFFAOYSA-N	1102	C(CCNCCCN)CN	0.526612	1.18436
succinate	KDYFGRWQOYBRFD-UHFFFAOYSA-N	1110	C(CC(=O)O)C(=O)O	0.442204	1.05188
sulfate*	QAOWNCQODCNURD-UHFFFAOYSA-N	1118	OS(=O)(=O)O	0.783827	1.0026
taurine	XOAAWQZATWQOTB-UHFFFAOYSA-N	1123	C(CS(=O)(=O)O)N	0.817465	1.30515
trimethylamine N-oxide	UYPYRKYUKCHHIB-UHFFFAOYSA-N	1145	C[N+](C)(C)[O-]	0.0601032	0.958883
urate	LEHOTFFKMJEONL-UHFFFAOYSA-N	1175	C12=C(NC(=O)N1)NC(=O)NC2=O	0.312406	0.963977
urea	XSQUKJJJFZCRTK-UHFFFAOYSA-N	1176	C(=O)(N)N	0.48736	0.970874
xanthine	LRFVTYWOQMYALW-UHFFFAOYSA-N	1188	C1=NC2=C(N1)C(=O)NC(=O)N2	0.116216	1.38649
S-1-pyrroline-5-carboxylate	DWAKNKKXGALPNW-UHFFFAOYSA-N	1196	C1CC(N=C1)C(=O)O	0.000164048	0.683766
vanillylmandelate (VMA)	CGQCWMIAEPEHNQ-UHFFFAOYSA-N	1245	COC1=C(C=CC(=C1)C(C(=O)O)O)O	0.655373	1.0892
3-hydroxy-3-methylglutarate	NPOAOTPXWNWTSH-UHFFFAOYSA-N	1662	CC(CC(=O)O)(CC(=O)O)O	0.0276653	0.920481
3-methoxytyrosine	PFDUUKDQEHURQC-UHFFFAOYSA-N	1670	COC1=C(C=CC(=C1)CC(C(=O)O)N)O	0.0935663	0.944347
theophylline	ZFXYFBGIUFBOJW-UHFFFAOYSA-N	2153	CN1C2=C(C(=O)N(C1=O)C)NC=N2	0.260629	1.04832
caffeine	RYYVLZVUVIJVGH-UHFFFAOYSA-N	2519	CN1C=NC2=C1C(=O)N(C(=O)N2C)C	0.188605	0.981501
carboxyethyl-GABA	SRGQUICKDUQCKO-UHFFFAOYSA-N	2572	C(CC(=O)O)CNCCC(=O)O	0.919204	1.00868
caprate (10:0)	GHVNFZFCNZKVNT-UHFFFAOYSA-N	2969	CCCCCCCCCC(=O)O	0.84508	1.00416
sphinganine	OTKJDMGTUTTYMP-UHFFFAOYSA-N	3126	CCCCCCCCCCCCCCCC(C(CO)N)O	0.0548219	1.20176
gentisate	WXTMDXOMEHJXQO-UHFFFAOYSA-N	3469	C1=CC(=C(C=C1O)C(=O)O)O	0.162861	1.11077
indolepropionate	GOLXRNDWAUTYKT-UHFFFAOYSA-N	3744	C1=CC=C2C(=C1)C(=CN2)CCC(=O)O	0.682026	0.968806
kynurenate	HCZHHEIFKROPDY-UHFFFAOYSA-N	3845	C1=CC=C2C(=C1)C(=O)C=C(N2)C(=O)O	0.973453	0.992771
phenyllactate (PLA)	VOXXWSYKYCBWHO-UHFFFAOYSA-N	3848	C1=CC=C(C=C1)CC(C(=O)O)O	0.256022	1.02491
laurate (12:0)	POULHZVOKOAJMA-UHFFFAOYSA-N	3893	CCCCCCCCCCCC(=O)O	0.146316	1.05817
palmitoyl ethanolamide	HXYVTAGFYLMHSO-UHFFFAOYSA-N	4671	CCCCCCCCCCCCCCCC(=O)NCCO	0.000412956	1.39424
paraxanthine	QUNWUDVFRNGTCO-UHFFFAOYSA-N	4687	CN1C=NC2=C1C(=O)N(C(=O)N2)C	0.459284	0.999886
sebacate (decanedioate)	CXMXRPHRNRROMY-UHFFFAOYSA-N	5192	C(CCCCC(=O)O)CCCC(=O)O	0.000377984	2.19646
serotonin	QZAYGJVTTNCVMB-UHFFFAOYSA-N	5202	C1=CC2=C(C=C1O)C(=CN2)CCN	0.903803	0.878829
N-acetyl-aspartyl-glutamate (NAAG)	OPVPGKGADVGKTG-UHFFFAOYSA-N	5255	CC(=O)NC(CC(=O)O)C(=O)NC(CCC(=O)O)C(=O)O	0.330298	1.16188
stearate (18:0)	QIQXTHQIDYTFRH-UHFFFAOYSA-N	5281	CCCCCCCCCCCCCCCCCC(=O)O	0.0592123	1.10924
theobromine	YAPQBXQYLJRXSA-UHFFFAOYSA-N	5429	CN1C=NC2=C1C(=O)NC(=O)N2C	0.272776	0.954048
trigonelline (N'-methylnicotinate)	WWNNZCOKKKDOPX-UHFFFAOYSA-N	5570	C[N+]1=CC=CC(=C1)C(=O)[O-]	0.913058	0.993572
xanthurenate	FBZONXHGGPHHIY-UHFFFAOYSA-N	5699	C1=CC2=C(C(=C1)O)NC(=CC2=O)C(=O)O	0.738154	0.951602
cortisol	JYGXADMDTFJGBT-VWUMJDOOSA-N	5754	C[C@]12CCC(=O)C=C1CC[C@@H]3[C@@H]2[C@H](C[C@]4([C@H]3CC[C@@]4(C(=O)CO)O)C)O	0.535903	0.994498
mannitol/sorbitol	FBPFZTCFMRRESA-JGWLITMVSA-N	5780	C([C@H]([C@H]([C@@H]([C@H](CO)O)O)O)O)O	0.546943	1.03487
trans-4-hydroxyproline	PMMYEEVYMWASQN-DMTCNVIQSA-N	5810	C1[C@H](CN[C@@H]1C(=O)O)O	0.582031	1.04308
thyroxine	XUIIKFGFIJCVMT-LBPRGKRZSA-N	5819	C1=C(C=C(C(=C1I)OC2=CC(=C(C(=C2)I)O)I)I)C[C@@H](C(=O)O)N	0.419382	0.977505
cysteine	XUJNEKJLAYXESH-REOHCLBHSA-N	5862	C([C@@H](C(=O)O)N)S	0.668122	1.015
alanine	QNAYBMKLOCPYGJ-REOHCLBHSA-N	5950	C[C@@H](C(=O)O)N	0.458089	1.01776
serine	MTCFGRXMJLQNBG-REOHCLBHSA-N	5951	C([C@@H](C(=O)O)N)O	0.353721	1.02395
aspartate	CKLJMWTZIZZHCS-REOHCLBHSA-N	5960	C([C@@H](C(=O)O)N)C(=O)O	0.525476	1.36012
glutamine	ZDXPYRJPNDTMRX-VKHMYHEASA-N	5961	C(CC(=O)N)[C@@H](C(=O)O)N	0.299193	0.980919
lysine	KDXKERNSBIXSRK-YFKPBYRVSA-N	5962	C(CCN)C[C@@H](C(=O)O)N	0.363802	0.981219
fructose	BJHIKXHVCXFQLS-UYFOZJQFSA-N	5984	C([C@H]([C@H]([C@@H](C(=O)CO)O)O)O)O	0.0241321	1.28862
uridine	DRTQHJPVMGBUCF-XVFCMESISA-N	6029	C1=CN(C(=O)NC1=O)[C@H]2[C@@H]([C@@H]([C@H](O2)CO)O)O	0.679304	1.04913
EDTA	KCXVZYZYPLLWCC-UHFFFAOYSA-N	6049	C(CN(CC(=O)O)CC(=O)O)N(CC(=O)O)CC(=O)O	0.970723	1.00125
tyrosine	OUYCCCASQSFEME-QMMMGPOBSA-N	6057	C1=CC(=CC=C1C[C@@H](C(=O)O)N)O	0.447409	0.981739
adenosine 3',5'-cyclic monophosphate (cAMP)	IVOMOUWHDPKRLL-KQYNXXCUSA-N	6076	C1[C@@H]2[C@H]([C@H]([C@@H](O2)N3C=NC4=C3N=CN=C4N)O)OP(=O)(O1)O	0.0897268	0.799239
adenosine 5'-monophosphate (AMP)	UDMBCSSLTHHNCD-KQYNXXCUSA-N	6083	C1=NC2=C(C(=N1)N)N=CN2[C@H]3[C@@H]([C@@H]([C@H](O3)COP(=O)(O)O)O)O	0.12624	1.31007
leucine	ROHFNLRQFUQHCH-YFKPBYRVSA-N	6106	CC(C)C[C@@H](C(=O)O)N	0.258447	0.971222
methionine	FFEARJCKVFRZRR-BYPYZUCNSA-N	6137	CSCC[C@@H](C(=O)O)N	0.168881	0.975073
phenylalanine	COLNVLDHVKWLRT-QMMMGPOBSA-N	6140	C1=CC=C(C=C1)C[C@@H](C(=O)O)N	0.290574	0.97987
cytidine	UHDGCWIWMRVCDJ-XVFCMESISA-N	6175	C1=CN(C(=O)N=C1N)[C@H]2[C@@H]([C@@H]([C@H](O2)CO)O)O	0.831722	0.771078
ornithine	AHLPHDHHMVZTML-BYPYZUCNSA-N	6262	C(C[C@@H](C(=O)O)N)CN	8.41778e-05	1.32859
asparagine	DCXYFEDJOCDNAF-REOHCLBHSA-N	6267	C([C@@H](C(=O)O)N)C(=O)N	0.257676	1.04012
histidine	HNDVDQJCIGZPNO-YFKPBYRVSA-N	6274	C1=C(NC=N1)C[C@@H](C(=O)O)N	0.323694	0.962438
valine	KZSNJWFQEVHDMF-BYPYZUCNSA-N	6287	CC(C)[C@@H](C(=O)O)N	0.38146	0.988636
threonine	AYFVYJQAPQTCCC-GBXIJSLDSA-N	6288	C[C@H]([C@@H](C(=O)O)N)O	0.657814	1.00751
tryptophan	QIVBCDIJIAJPQS-VIFPVBQESA-N	6305	C1=CC=C2C(=C1)C(=CN2)C[C@@H](C(=O)O)N	0.840428	0.9902
isoleucine	AGPKZVBTJJNPAG-WHFBIAKZSA-N	6306	CC[C@H](C)[C@@H](C(=O)O)N	0.140287	0.974856
quinate	AAWZDTNXLSGCEK-LNVDRNJUSA-N	6508	C1[C@H](C([C@@H](CC1(C(=O)O)O)O)O)O	0.365932	1.07093
pantothenate	GHOKWGTUZJEAQD-ZETCQYMHSA-N	6613	CC(C)(CO)[C@H](C(=O)NCCC(=O)O)O	0.443643	0.942264
taurocholate	WBWWGRHZICKQGZ-HZAMXZRMSA-N	6675	C[C@H](CCC(=O)NCCS(=O)(=O)O)[C@H]1CC[C@@H]2[C@@]1([C@H](C[C@H]3[C@H]2[C@@H](C[C@H]4[C@@]3(CC[C@H](C4)O)C)O)O)C	0.904498	1.00852
pyridoxate	HXACOUQIXZGNBF-UHFFFAOYSA-N	6723	CC1=NC=C(C(=C1O)C(=O)O)CO	0.138066	1.20478
arabitol/xylitol	HEBKCHPVOIAQTA-NGQZWQHPSA-N	6912	C([C@H](C([C@H](CO)O)O)O)O	0.712038	1.0126
5-oxoproline	ODHCTXKNWHHXJC-VKHMYHEASA-N	7405	C1CC(=O)N[C@@H]1C(=O)O	5.87483e-05	1.3228
behenate (22:0)*	UKMSUNONTOPOIO-UHFFFAOYSA-N	8215	CCCCCCCCCCCCCCCCCCCCCC(=O)O	0.0747502	1.10575
iminodiacetate (IDA)	NBZBKCUXIYYUSX-UHFFFAOYSA-N	8897	C(C(=O)O)NCC(=O)O	0.361953	0.910322
homoarginine	QUOGESRFPZDMMT-YFKPBYRVSA-N	9085	C(CCN=C(N)N)C[C@@H](C(=O)O)N	0.048856	0.915888
3-(4-hydroxyphenyl)lactate	JVGVDSSUAVXRDY-UHFFFAOYSA-N	9378	C1=CC(=CC=C1CC(C(=O)O)O)O	0.845938	0.969113
citrulline	RHGKLRLOHDJJDR-BYPYZUCNSA-N	9750	C(C[C@@H](C(=O)O)N)CNC(=O)N	0.0437646	0.949922
glycocholate	RFDAIACWWDREDC-FRVQLJSFSA-N	10140	C[C@H](CCC(=O)NCC(=O)O)[C@H]1CC[C@@H]2[C@@]1([C@H](C[C@H]3[C@H]2[C@@H](C[C@H]4[C@@]3(CC[C@H](C4)O)C)O)O)C	0.889028	1.02556
2-hydroxyhippurate (salicylurate)	ONJSZLXSECQROL-UHFFFAOYSA-N	10253	C1=CC=C(C(=C1)C(=O)NCC(=O)O)O	0.792372	0.979956
3-indoxyl sulfate	BXFFHSIDQOFMLE-UHFFFAOYSA-N	10258	C1=CC=C2C(=C1)C(=CN2)OS(=O)(=O)O	0.317143	0.919534
methylsuccinate	WXUAQHNMJWJLTG-UHFFFAOYSA-N	10349	CC(CC(=O)O)C(=O)O	0.841456	0.993606
margarate (17:0)	KEMQGTRYUADPNZ-UHFFFAOYSA-N	10465	CCCCCCCCCCCCCCCCC(=O)O	0.241048	1.04707
arachidate (20:0)	VKOBVWXKNCXXDE-UHFFFAOYSA-N	10467	CCCCCCCCCCCCCCCCCCCC(=O)O	0.048167	1.16842
gluconate	RGHNJXZEOKUKBD-SQOUGZDYSA-N	10690	C([C@H]([C@H]([C@@H]([C@H](C(=O)O)O)O)O)O)O	0.522918	0.963904
carnitine	PHIQHXFUZVPYII-ZCFIWIBFSA-N	10917	C[N+](C)(C)C[C@@H](CC(=O)[O-])O	0.195992	0.977007
N-acetylglycine	OKJIRPAQVSHGFK-UHFFFAOYSA-N	10972	CC(=O)NCC(=O)O	0.332276	1.10849
myristate (14:0)	TUNFSRHWOTWDNC-UHFFFAOYSA-N	11005	CCCCCCCCCCCCCC(=O)O	0.341317	0.956885
succinimide	KZNICNPSHKQLFF-UHFFFAOYSA-N	11439	C1CC(=O)NC1=O	0.431582	0.951176
ethylmalonate	UKFXDFUAPNAMPJ-UHFFFAOYSA-N	11756	CCC(C(=O)O)C(=O)O	0.480456	0.988327
galactitol (dulcitol)	FBPFZTCFMRRESA-GUCUJZIJSA-N	11850	C([C@H]([C@@H]([C@@H]([C@H](CO)O)O)O)O)O	0.371394	1.04812
2-hydroxyphenylacetate	CCVYRRGZDBSHFU-UHFFFAOYSA-N	11970	C1=CC=C(C(=C1)CC(=O)O)O	0.0450615	1.16293
glycochenodeoxycholate	GHCZAUBVMUEKKP-GYPHWSFCSA-N	12544	C[C@H](CCC(=O)NCC(=O)O)[C@H]1CC[C@@H]2[C@@]1(CC[C@H]3[C@H]2[C@@H](C[C@H]4[C@@]3(CC[C@H](C4)O)C)O)C	0.543725	1.02604
nonadecanoate (19:0)	ISYWECDDZWTKFF-UHFFFAOYSA-N	12591	CCCCCCCCCCCCCCCCCCC(=O)O	0.309796	1.06731
dehydroisoandrosterone sulfate (DHEA-S)	CZWCKYRVOZZJNM-USOAJAOKSA-N	12594	C[C@]12CC[C@H]3[C@H]([C@@H]1CCC2=O)CC=C4[C@@]3(CC[C@@H](C4)OS(=O)(=O)O)C	0.775404	0.976009
homoserine	UKAUYVFTDYCKQA-VKHMYHEASA-N	12647	C(CO)[C@@H](C(=O)O)N	0.939847	1.02699
2-piperidinone	XUWHAWMETYGRKB-UHFFFAOYSA-N	12665	C1CCNC(=O)C1	0.950806	1.00112
dodecanedioate	TVIDDXQYHWJXFK-UHFFFAOYSA-N	12736	C(CCCCCC(=O)O)CCCCC(=O)O	0.197603	0.808585
pentadecanoate (15:0)	WQEPLUUGTLDZJY-UHFFFAOYSA-N	13849	CCCCCCCCCCCCCCC(=O)O	0.179081	0.919227
10-undecenoate (11:1n1)	FRPZMMHWLSIFAZ-UHFFFAOYSA-M	14891	C=CCCCCCCCCC(=O)[O-]	0.898878	0.999224
1-palmitoylglycerol (16:0)	QHZLMUACJMDIAE-UHFFFAOYSA-N	14900	CCCCCCCCCCCCCCCC(=O)OCC(CO)O	0.163978	1.64176
alpha-tocopherol	GVJHHUAWPYXKBD-IEOSBIPESA-N	14985	CC1=C(C(=C2CC[C@@](OC2=C1C)(C)CCC[C@H](C)CCC[C@H](C)CCCC(C)C)C)O	0.209376	0.984065
pseudouridine	PTJWIQPHWPFNBW-GBNDHIKLSA-N	15047	C1=C(C(=O)NC(=O)N1)[C@H]2[C@@H]([C@@H]([C@H](O2)CO)O)O	0.831681	1.03356
4-acetamidobutanoate	UZTFMUBKZQVKLK-UHFFFAOYSA-N	18189	CC(=O)NCCCC(=O)O	0.270186	1.03815
mannose	WQZGKKKJIJFFOK-QTVWNMPRSA-N	18950	C([C@@H]1[C@H]([C@@H]([C@@H](C(O1)O)O)O)O)O	0.0106741	0.898016
2-hydroxydecanoate	GHPVDCPCKSNJDR-UHFFFAOYSA-N	21488	CCCCCCCCC(C(=O)O)O	0.17224	0.946324
O-methylcatechol sulfate	AQTYXAPIHMXAAV-UHFFFAOYSA-N	22473	COC1=CC=CC=C1OS(=O)(=O)O	0.870712	0.996347
S-methylcysteine	IDIDJDIHTAOVLG-VKHMYHEASA-N	24417	CSC[C@@H](C(=O)O)N	0.969649	1.03246
3-hydroxydecanoate	FYSSBMZUBSBFJL-UHFFFAOYSA-N	26612	CCCCCCCC(CC(=O)O)O	0.243308	1.01953
3-hydroxyoctanoate	NDPLAKGOSZHTPH-UHFFFAOYSA-N	26613	CCCCCC(CC(=O)O)O	0.891286	1.00078
phytanate	RLCKHJSFHOZMDR-UHFFFAOYSA-N	26840	CC(C)CCCC(C)CCCC(C)CCCC(C)CC(=O)O	0.32791	1.10674
N1-methyladenosine	GFYLSDSUCHVORB-IOSLPCCCSA-N	27476	CN1C=NC2=C(C1=N)N=CN2[C@H]3[C@@H]([C@@H]([C@H](O3)CO)O)O	0.0536295	0.92156
stearoyl ethanolamide	OTGQIQQTPXJQRG-UHFFFAOYSA-N	27902	CCCCCCCCCCCCCCCCCC(=O)NCCO	0.000539933	1.43283
stearamide	LYRFLYHAGKPMFH-UHFFFAOYSA-N	31292	CCCCCCCCCCCCCCCCCC(=O)N	0.00904395	1.53468
ursodeoxycholate	RUDATBOHQWOJDD-UZVSRGJWSA-N	31401	C[C@H](CCC(=O)O)[C@H]1CC[C@@H]2[C@@]1(CC[C@H]3[C@H]2[C@H](C[C@H]4[C@@]3(CC[C@H](C4)O)C)O)C	0.53032	1.07553
4-hydroxychlorothalonil	MDQKYGOECVSPIW-UHFFFAOYSA-N	34217	C(#N)C1=C(C(=C(C(=C1Cl)C#N)Cl)Cl)O	0.836472	1.00657
gamma-carboxyglutamate	UHBYWPGGCSDKFX-UHFFFAOYSA-N	40772	C(C(C(=O)O)C(=O)O)C(C(=O)O)N	0.197864	0.920704
13-HODE + 9-HODE	XBGUTAISSLTGIB-UHFFFAOYSA-N	43013	CC1C(=NOC(=O)NC)SCS1	0.233762	1.15774
3-aminoisobutyrate	QCHPKSFMDHPSNR-UHFFFAOYSA-N	64956	CC(CN)C(=O)O	0.0607263	0.942837
1,5-anhydroglucitol (1,5-AG)	MPCAJMNYNOGXPB-SLPGGIOYSA-N	64960	C1[C@@H]([C@H]([C@@H]([C@H](O1)CO)O)O)O	0.594102	0.985298
3-methylhistidine	JDHILDINMRGULE-LURJTMIESA-N	64969	CN1C=NC=C1C[C@@H](C(=O)O)N	0.942605	0.955737
N-acetylaspartate (NAA)	OTCCIMWXFLJLIA-BYPYZUCNSA-N	65065	CC(=O)N[C@@H](CC(=O)O)C(=O)O	0.275377	0.893657
homocitrulline	XIGSAGMEBXLVJJ-YFKPBYRVSA-N	65072	C(CCNC(=O)N)C[C@@H](C(=O)O)N	0.178007	0.823836
N1-methylinosine	WJNGQIYEQLPJMN-IOSLPCCCSA-N	65095	CN1C=NC2=C(C1=O)N=CN2[C@H]3[C@@H]([C@@H]([C@H](O3)CO)O)O	0.0178385	1.08776
N-acetylserine	JJIHLJJYMXLCOY-BYPYZUCNSA-N	65249	CC(=O)N[C@@H](CO)C(=O)O	0.664425	0.975867
gamma-glutamyl-alpha-lysine	LNLLNTMHVMIMOG-YUMQZZPRSA-N	65254	C(CCN)C[C@@H](C(=O)O)NC(=O)CC[C@@H](C(=O)O)N	0.862211	1.00918
arabinose	PYMYPHUHKUWMLA-WDCZJNDASA-N	66308	C([C@H]([C@H]([C@@H](C=O)O)O)O)O	0.830194	0.988492
N-acetylarginine	SNEIUMQYRCDYCH-LURJTMIESA-N	67427	CC(=O)N[C@@H](CCCN=C(N)N)C(=O)O	0.0051896	0.931448
cystine	LEVWYRKDKASIDU-IMJSIDKUSA-N	67678	C([C@@H](C(=O)O)N)SSC[C@@H](C(=O)O)N	0.23908	0.791941
beta-guanidinopropanoate	KMXXSJLYVJEBHI-UHFFFAOYSA-N	67701	C(CN=C(N)N)C(=O)O	0.457908	0.818293
N-acetyltyrosine	CAHKINHBCWCHCF-JTQLQIEISA-N	68310	CC(=O)N[C@@H](CC1=CC=C(C=C1)O)C(=O)O	0.844839	1.01515
7-methylxanthine	PFWLFWPASULGAN-UHFFFAOYSA-N	68374	CN1C=NC2=C1C(=O)NC(=O)N2	0.240863	0.966976
glutamate, gamma-methyl ester	ZGEYCCHDTIDZAE-BYPYZUCNSA-N	68662	COC(=O)CC[C@@H](C(=O)O)N	0.986731	1.02691
7-methylurate	YHNNPKUFPWLTOP-UHFFFAOYSA-N	69160	CN1C2=C(NC(=O)NC2=O)NC1=O	0.992801	1.02566
beta-hydroxyisovalerate	AXFYFNCPONWUHW-UHFFFAOYSA-N	69362	CC(C)(CC(=O)O)O	0.242898	0.852646
2-hydroxystearate	KIHBGTRZFAVZRV-UHFFFAOYSA-N	69417	CCCCCCCCCCCCCCCCC(C(=O)O)O	0.112542	1.14962
palmitic amide	HSEMFIZWXHQJAE-UHFFFAOYSA-N	69421	CCCCCCCCCCCCCCCC(=O)N	0.233245	1.19989
2-aminooctanoate	AKVBCGQVQXPRLD-UHFFFAOYSA-N	69522	CCCCCCC(C(=O)O)N	0.581125	0.997326
N1-Methyl-2-pyridone-5-carboxamide	JLQSXXWTCJPCBC-UHFFFAOYSA-N	69698	CN1C=C(C=CC1=O)C(=O)N	0.186831	0.971012
1-methylurate	QFDRTQONISXGJA-UHFFFAOYSA-N	69726	CN1C(=O)C2=C(NC(=O)N2)NC1=O	0.647846	0.938375
indole-3-carboxylic acid	KMAKOBLIOCQGJP-UHFFFAOYSA-N	69867	C1=CC=C2C(=C1)C(=CN2)C(=O)O	0.168815	1.14403
methionine sulfone	UCUNFLYVYCGDHP-UHFFFAOYSA-N	69961	CS(=O)(=O)CCC(C(=O)O)N	0.384289	0.973569
octadecanedioate	BNJOQKFENDDGSC-UHFFFAOYSA-N	70095	C(CCCCCCCCC(=O)O)CCCCCCCC(=O)O	0.683083	0.955677
imidazole propionate	ZCKYOWGFRHAZIQ-UHFFFAOYSA-N	70630	C1=C(NC=N1)CCC(=O)O	0.119604	0.914641
3-methylxanthine	GMSNIKWWOQHZGF-UHFFFAOYSA-N	70639	CN1C2=C(C(=O)NC1=O)NC=N2	0.348271	0.958302
N-acetylleucine	WXNXCEHXYPACJF-ZETCQYMHSA-N	70912	CC(C)C[C@@H](C(=O)O)NC(=O)C	0.11096	0.803023
N-acetylglutamate	RFMMMVDNIPUKGG-YFKPBYRVSA-N	70914	CC(=O)N[C@@H](CCC(=O)O)C(=O)O	0.650764	1.02773
glycerophosphorylcholine (GPC)	SUHOQUVVVLNYQR-QMMMGPOBSA-N	71920	C[N+](C)(C)CCOP(=O)([O-])OC[C@H](CO)O	0.993093	0.636213
glycolithocholate sulfate*	FHXBAFXQVZOILS-OETIFKLTSA-N	72222	C[C@H](CCC(=O)NCC(=O)O)[C@H]1CC[C@@H]2[C@@]1(CC[C@H]3[C@H]2CC[C@H]4[C@@]3(CC[C@H](C4)OS(=O)(=O)O)C)C	0.990596	0.969394
phenol sulfate	CTYRPMDGLDAWRQ-UHFFFAOYSA-N	74426	C1=CC=C(C=C1)OS(=O)(=O)O	0.69288	1.01029
perfluorooctanesulfonic acid (PFOS)	YFSUTJLHUFNCNZ-UHFFFAOYSA-N	74483	C(C(C(C(C(F)(F)S(=O)(=O)O)(F)F)(F)F)(F)F)(C(C(C(F)(F)F)(F)F)(F)F)(F)F	0.38488	1.05755
N-acetylphenylalanine	CBQJSKKFNMDLON-JTQLQIEISA-N	74839	CC(=O)N[C@@H](CC1=CC=CC=C1)C(=O)O	0.67915	0.987393
eicosanodioate	JJOJFIHJIRWASH-UHFFFAOYSA-N	75502	C(CCCCCCCCCC(=O)O)CCCCCCCCC(=O)O	0.439222	0.981442
N-acetylhistidine	KBOJOGQFRVVWBH-ZETCQYMHSA-N	75619	CC(=O)N[C@@H](CC1=CN=CN1)C(=O)O	0.867334	1.00206
1-methylimidazoleacetate	ZHCKPJGJQOPTLB-UHFFFAOYSA-N	75810	CN1C=C(N=C1)CC(=O)O	0.510671	0.984623
N-acetyl-beta-alanine	LJLLAWRMBZNPMO-UHFFFAOYSA-N	76406	CC(=O)NCCC(=O)O	0.0754075	0.865461
glucose	WQZGKKKJIJFFOK-DVKNGEFBSA-N	79025	C([C@@H]1[C@H]([C@@H]([C@H]([C@H](O1)O)O)O)O)O	0.02191	0.928415
S-methylcysteine sulfoxide	ZZLHPCSGGOGHFW-UHFFFAOYSA-N	82142	CS(=O)CC(C(=O)O)N	0.365058	1.06491
alpha-hydroxyisocaproate	LVRFTAZAXQPQHI-YFKPBYRVSA-N	83697	CC(C)C[C@@H](C(=O)O)O	0.858543	1.0073
1-palmitoyl-GPC (16:0)	ASWBNKHCZGQVJV-UHFFFAOYSA-N	86554	CCCCCCCCCCCCCCCC(=O)OCC(COP(=O)([O-])OCC[N+](C)(C)C)O	0.00871723	1.10143
N-acetylalanine	KTHDTJVBEPMMGL-VKHMYHEASA-N	88064	C[C@@H](C(=O)O)NC(=O)C	0.477271	1.09658
5-acetylamino-6-amino-3-methyluracil	POQOTWQIYYNXAT-UHFFFAOYSA-N	88299	CC(=O)NC1=C(NC(=O)N(C1=O)C)N	0.864208	1.07654
4-cholesten-3-one	NYOXRYYXRWJDKP-GYKMGIIDSA-N	91477	C[C@H](CCCC(C)C)[C@H]1CC[C@@H]2[C@@]1(CC[C@H]3[C@H]2CCC4=CC(=O)CC[C@]34C)C	0.127986	1.14247
1,7-dimethylurate	NOFNCLGCUJJPKU-UHFFFAOYSA-N	91611	CN1C2=C(NC1=O)NC(=O)N(C2=O)C	0.482898	1.02165
1-methylhistidine	BRMWTNUJHUMWMS-LURJTMIESA-N	92105	CN1C=C(N=C1)C[C@@H](C(=O)O)N	0.785155	1.03283
phenylacetylglutamine	JFLIEFSWGNOPJJ-JTQLQIEISA-N	92258	C1=CC=C(C=C1)CC(=O)N[C@@H](CCC(=O)N)C(=O)O	0.0289346	0.944524
orotidine	FKCRAVPPBFWEJD-XVFCMESISA-N	92751	C1=C(N(C(=O)NC1=O)[C@H]2[C@@H]([C@@H]([C@H](O2)CO)O)O)C(=O)O	0.932493	0.982688
hyocholate	DKPMWHFRUGMUKF-KWXDGCAGSA-N	92805	C[C@H](CCC(=O)O)[C@H]1CC[C@@H]2[C@@]1(CC[C@H]3[C@H]2[C@@H]([C@@H]([C@H]4[C@@]3(CC[C@H](C4)O)C)O)O)C	0.836534	0.987742
N6-acetyllysine	DTERQYGMUDWYAZ-ZETCQYMHSA-N	92832	CC(=O)NCCCC[C@@H](C(=O)O)N	0.855115	1.0341
2-hydroxypalmitate	JGHSBPIZNUXPLA-UHFFFAOYSA-N	92836	CCCCCCCCCCCCCCC(C(=O)O)O	0.689562	1.06783
gamma-glutamylglutamate	OWQDWQKWSLFFFR-WDSKDSINSA-N	92865	C(CC(=O)N[C@@H](CCC(=O)O)C(=O)O)[C@@H](C(=O)O)N	0.0158623	0.853658
indolelactate	XGILAAMKEQUXLS-UHFFFAOYSA-N	92904	C1=CC=C2C(=C1)C(=CN2)CC(C(=O)O)O	0.537728	1.02295
thioproline	DZLNHFMRPBPULJ-VKHMYHEASA-N	93176	C1[C@H](NCS1)C(=O)O	0.387359	0.948903
5,6-dihydrothymine	NBAKTGXDIBVZOO-UHFFFAOYSA-N	93556	CC1CNC(=O)NC1=O	0.618913	1.0665
2-hydroxyoctanoate	JKRDADVRIYVCCY-UHFFFAOYSA-N	94180	CCCCCCC(C(=O)O)O	0.553616	1.04767
3-hydroxylaurate	MUCMKTPAZLSKTL-UHFFFAOYSA-N	94216	CCCCCCCCCC(CC(=O)O)O	0.795802	0.987181
gamma-glutamyltyrosine	VVLXCWVSSLFQDS-QWRGUYRKSA-N	94340	C1=CC(=CC=C1C[C@@H](C(=O)O)NC(=O)CC[C@@H](C(=O)O)N)O	0.590573	0.951195
4-imidazoleacetate	PRJKNHOMHKJCEJ-UHFFFAOYSA-N	96215	C1=C(NC=N1)CC(=O)O	0.0202427	1.65438
5-bromotryptophan	KZDNJQUJBMDHJW-UHFFFAOYSA-N	96735	C1=CC2=C(C=C1Br)C(=CN2)CC(C(=O)O)N	0.959191	1.00472
lanthionine	DWPCPZJAHOETAG-IMJSIDKUSA-N	98504	C([C@@H](C(=O)O)N)SC[C@@H](C(=O)O)N	0.0371071	0.810647
alpha-hydroxyisovalerate	NGEWQZIDQIYUNV-UHFFFAOYSA-N	99823	CC(C)C(C(=O)O)O	0.40803	1.06176
N-formylanthranilic acid	LLLPDUXGHXIXIW-UHFFFAOYSA-N	101399	C1=CC=C(C(=C1)C(=O)O)NC=O	0.520193	0.959067
pregnenolone sulfate	DIJBBUIOWGGQOP-QGVNFLHTSA-N	105074	CC(=O)[C@H]1CC[C@@H]2[C@@]1(CC[C@H]3[C@H]2CC=C4[C@@]3(CC[C@@H](C4)OS(=O)(=O)O)C)C	0.562321	1.02061
N4-acetylcytidine	NIDVTARKFBZMOT-PEBGCTIMSA-N	107461	CC(=O)NC1=NC(=O)N(C=C1)[C@H]2[C@@H]([C@@H]([C@H](O2)CO)O)O	0.611287	0.947016
propionylcarnitine (C3)	UFAHZIUFPNSHSL-UHFFFAOYSA-N	107738	CCC(=O)OC(CC(=O)[O-])C[N+](C)(C)C	0.903716	0.980651
hypotaurine	VVIUBCNYACGLLV-UHFFFAOYSA-N	107812	C(CS(=O)O)N	0.668983	1.22926
5-acetylamino-6-formylamino-3-methyluracil	RDZNZFGKEVDNPK-UHFFFAOYSA-N	108214	CC(=O)NC1=C(NC(=O)N(C1=O)C)NC=O	0.175029	0.73501
gamma-glutamylphenylalanine	XHHOHZPNYFQJKL-QWRGUYRKSA-N	111299	C1=CC=C(C=C1)C[C@@H](C(=O)O)NC(=O)CC[C@@H](C(=O)O)N	0.653621	1.03663
cysteine s-sulfate	NOKPBJYHPHHWAN-REOHCLBHSA-N	115015	C([C@@H](C(=O)O)N)SS(=O)(=O)O	0.0647574	1.14361
stachydrine	CMUNUTVVOOHQPW-LURJTMIESA-N	115244	C[N+]1(CCC[C@H]1C(=O)[O-])C	0.632263	1.01327
dopamine 3-O-sulfate	NZKRYJGNYPYXJZ-UHFFFAOYSA-N	122136	C1=CC(=C(C=C1CCN)OS(=O)(=O)O)O	0.789658	0.953779
pyrraline	VTYFITADLSVOAS-NSHDSACASA-N	122228	C1=C(N(C(=C1)C=O)CCCC[C@@H](C(=O)O)N)CO	0.66016	0.931979
N-acetylputrescine	KLZGKIDSEJWEDW-UHFFFAOYSA-N	122356	CC(=O)NCCCCN	0.00486616	0.930903
octanoylcarnitine (C8)	CXTATJFJDMJMIY-UHFFFAOYSA-N	123701	CCCCCCCC(=O)OC(CC(=O)[O-])C[N+](C)(C)C	0.183265	1.0129
pregnanediol-3-glucuronide	ZFFFJLDTCLJDHL-JQYCEVDMSA-N	123796	C[C@@H]([C@H]1CC[C@@H]2[C@@]1(CC[C@H]3[C@H]2CC[C@H]4[C@@]3(CC[C@H](C4)O[C@H]5[C@@H]([C@H]([C@@H]([C@H](O5)C(=O)O)O)O)O)C)C)O	0.842402	1.02614
dimethylarginine (SDMA + ADMA)	YDGMGEXADBMOMJ-LURJTMIESA-N	123831	CN(C)C(=NCCC[C@@H](C(=O)O)N)N	0.057	0.837485
glycerophosphoethanolamine	JZNWSCPGTDBMEW-UHFFFAOYSA-N	123874	C(COP(=O)(O)OCC(CO)O)N	0.800184	1.01308
pristanate	PAHGJZDQXIOYTH-UHFFFAOYSA-N	123929	CC(C)CCCC(C)CCCC(C)CCCC(C)C(=O)O	0.596773	0.9263
3-carboxy-4-methyl-5-propyl-2-furanpropanoate (CMPF)	WMCQWXZMVIETAO-UHFFFAOYSA-N	123979	CCCC1=C(C(=C(O1)CCC(=O)O)C(=O)O)C	0.967742	1.11481
ectoine	WQXNXVUDBPYKBA-YFKPBYRVSA-N	126041	CC1=NCC[C@H](N1)C(=O)O	0.495178	0.968609
isoursodeoxycholate	RUDATBOHQWOJDD-DNMBCGTGSA-N	127601	C[C@H](CCC(=O)O)[C@H]1CC[C@@H]2[C@@]1(CC[C@H]3[C@H]2[C@H](C[C@H]4[C@@]3(CC[C@@H](C4)O)C)O)C	0.869966	1.14823
3-methylglutarylcarnitine (2)	HFCPFJNSBPQJDP-UHFFFAOYSA-N	128145	CC(CC(=O)[O-])CC(=O)OC(CC(=O)O)C[N+](C)(C)C	0.394449	0.96502
acisoga	OAUYENAPBFTAQT-UHFFFAOYSA-N	129397	CC(=O)NCCCN1CCCC1=O	0.653643	0.98411
1-myristoyl-2-palmitoyl-GPC (14:0/16:0)	RFVFQQWKPSOBED-PSXMRANNSA-N	129657	CCCCCCCCCCCCCCCC(=O)O[C@H](COC(=O)CCCCCCCCCCCCC)COP(=O)([O-])OCC[N+](C)(C)C	0.960823	1.00788
gamma-CEHC	VMJQLPNCUPGMNQ-UHFFFAOYSA-N	133098	CC1=C(C=C2CCC(OC2=C1C)(C)CCC(=O)O)O	0.658486	1.00804
pyroglutamine*	NPWMTBZSRRLQNJ-UHFFFAOYSA-N	134508	C1CC(=O)NC(=O)C1N	0.390269	0.964713
21-hydroxypregnenolone disulfate	CBOVWLYQUCVTFA-WPWXJNKXSA-N	134595	C[C@]12CC[C@H]3[C@H]([C@@H]1CC[C@@H]2C(=O)COS(=O)(=O)O)CC=C4[C@@]3(CC[C@@H](C4)OS(=O)(=O)O)C	0.845555	1.01068
proline	ONIBWKKTOPOVIA-BYPYZUCNSA-N	145742	C1C[C@H](NC1)C(=O)O	0.139525	1.02839
gamma-glutamylglutamine	JBFYFLXEJFQWMU-WDSKDSINSA-N	150914	C(CC(=O)N[C@@H](CCC(=O)N)C(=O)O)[C@@H](C(=O)O)N	0.000182409	1.22826
2'-O-methylcytidine	RFCQJGFZUQFYRF-ZOQUXTDFSA-N	150971	CO[C@@H]1[C@@H]([C@H](O[C@H]1N2C=CC(=NC2=O)N)CO)O	0.617774	1.0109
N-palmitoylglycine	KVTFEOAKFFQCCX-UHFFFAOYSA-N	151008	CCCCCCCCCCCCCCCC(=O)NCC(=O)O	0.383904	1.0647
4-hydroxyhippurate	ZMHLUFWWWPBTIU-UHFFFAOYSA-N	151012	C1=CC(=CC=C1C(=O)NCC(=O)O)O	0.897018	0.862827
13-methylmyristate	ZOCYQVNGROEVLU-UHFFFAOYSA-N	151014	CC(C)CCCCCCCCCCCC(=O)O	0.159588	0.827649
gamma-glutamylleucine	MYFMARDICOWMQP-YUMQZZPRSA-N	151023	CC(C)C[C@@H](C(=O)O)NC(=O)CC[C@@H](C(=O)O)N	0.847821	0.96994
threonate	JPIJQSOTBSSVTP-GBXIJSLDSA-N	151152	C([C@H]([C@@H](C(=O)O)O)O)O	0.644447	1.08405
3-hydroxyhexanoate	HPMGFDVTYHWBAG-UHFFFAOYSA-N	151492	CCCC(CC(=O)O)O	0.880339	0.991826
palmitoylcholine	ODYPFMHOOQOHEF-UHFFFAOYSA-N	151731	CCCCCCCCCCCCCCCC(=O)OCC[N+](C)(C)C	0.146222	1.46937
N-acetylthreonine	PEDXUVCGOLSNLQ-WUJLRWPWSA-N	152204	C[C@H]([C@@H](C(=O)O)NC(=O)C)O	0.0670035	0.923175
17alpha-hydroxypregnenolone 3-sulfate	OMOKWYAQVYBHMG-QUPIPBJSSA-N	152971	CC(=O)[C@]1(CC[C@@H]2[C@@]1(CC[C@H]3[C@H]2CC=C4[C@@]3(CCC(C4)OS(=O)(=O)O)C)C)O	0.781019	1.05438
p-cresol-glucuronide*	JPAUCQAJHLSMQW-XPORZQOISA-N	154035	CC1=CC=C(C=C1)O[C@H]2[C@@H]([C@H]([C@@H]([C@H](O2)C(=O)O)O)O)O	0.690904	0.866251
methionine sulfoxide	QEFRNWWLZKMPFJ-YGVKFDHGSA-N	158980	CS(=O)CC[C@@H](C(=O)O)N	0.989713	1.00529
3-methylcytidine	RDPUKVRQKWBSPK-YYNOVJQHSA-N	159649	CN1C(=N)C=CN(C1=O)[C@@H]2[C@@H]([C@@H]([C@H](O2)CO)O)O	0.00550431	0.818551
androsterone sulfate	ZMITXKRGXGRMKS-HLUDHZFRSA-N	159663	C[C@]12CC[C@H](C[C@@H]1CC[C@@H]3[C@@H]2CC[C@]4([C@H]3CCC4=O)C)OS(=O)(=O)O	0.910483	0.994695
N-acetyltaurine	CXJAAWRLVGAKDV-UHFFFAOYSA-N	159864	CC(=O)NCCS(=O)(=O)O	0.608488	0.976252
argininate*	BMFMQGXDDJALKQ-BYPYZUCNSA-N	160437	C(C[C@@H](C(=O)O)O)CN=C(N)N	0.349284	0.947587
kynurenine	YGPSJZOEDVAXAB-QMMMGPOBSA-N	161166	C1=CC=C(C(=C1)C(=O)C[C@@H](C(=O)O)N)N	0.98033	1.00833
2-keto-3-deoxy-gluconate	WPAMZTWLKIDIOP-WVZVXSGGSA-N	161227	C([C@@H]([C@@H](CO)O)O)C(=O)C(=O)O	0.0007294	1.32117
N6-carbamoylthreonyladenosine	UNUYMBPXEFMLNW-DWVDDHQFSA-N	161466	C[C@H]([C@@H](C(=O)O)NC(=O)NC1=NC=NC2=C1N=CN2[C@H]3[C@@H]([C@@H]([C@H](O3)CO)O)O)O	0.777295	0.98453
2-hydroxy-3-methylvalerate	RILPIWOPNGRASR-UHFFFAOYSA-N	164623	CCC(C)C(C(=O)O)O	0.479492	1.03086
3beta-hydroxy-5-cholestenoate	WVXOMPRLWLXFAP-AMQKJUDNSA-N	165511	C[C@H](CCCC(C)C(=O)O)[C@H]1CC[C@@H]2[C@@]1(CC[C@H]3[C@H]2CC=C4[C@@]3(CC[C@@H](C4)O)C)C	0.19266	0.903978
gamma-glutamylglycine	ACIJGUBIMXQCMF-BYPYZUCNSA-N	165527	C(CC(=O)NCC(=O)O)[C@@H](C(=O)O)N	0.47271	1.01924
isobutyrylcarnitine (C4)	LRCNOZRCYBNMEP-SECBINFHSA-N	168379	CC(C)C(=O)O[C@H](CC(=O)[O-])C[N+](C)(C)C	0.04583	0.943834
2-aminophenol sulfate	VSTZVCJQGSLNLL-UHFFFAOYSA-N	181670	C1=CC=C(C(=C1)N)OS(=O)(=O)O	0.95291	1.00755
3-hydroxy-2-ethylpropionate	ZMZQVAUJTDKQGE-UHFFFAOYSA-N	188979	CCC(CO)C(=O)O	0.071088	0.831992
cholate	BHQCQFFYRZLCQQ-OELDTZBJSA-N	221493	C[C@H](CCC(=O)O)[C@H]1CC[C@@H]2[C@@]1([C@H](C[C@H]3[C@H]2[C@@H](C[C@H]4[C@@]3(CC[C@H](C4)O)C)O)O)C	0.493058	0.965082
erythritol	UNXHWFMMPAWVPI-ZXZARUISSA-N	222285	C([C@H]([C@H](CO)O)O)O	0.928606	0.995388
deoxycholate	KXGVEGMKQFWNSR-LLQZFEROSA-N	222528	C[C@H](CCC(=O)O)[C@H]1CC[C@@H]2[C@@]1([C@H](C[C@H]3[C@H]2CC[C@H]4[C@@]3(CC[C@H](C4)O)C)O)C	0.660105	0.94771
cortisone	MFYSYFVPBJMHGN-ZPOLXVRWSA-N	222786	C[C@]12CCC(=O)C=C1CC[C@@H]3[C@@H]2C(=O)C[C@]4([C@H]3CC[C@@]4(C(=O)CO)O)C	0.783673	1.00004
2-aminoheptanoate	RDFMDVXONNIGBC-UHFFFAOYSA-N	227939	CCCCCC(C(=O)O)N	0.76249	0.994965
5alpha-androstan-3beta,17beta-diol disulfate	CBMYJHIOYJEBSB-YSZCXEEOSA-N	242332	C[C@]12CC[C@@H](C[C@@H]1CC[C@@H]3[C@@H]2CC[C@]4([C@H]3CC[C@@H]4O)C)O	0.630631	0.989601
docosadioate	DGXRZJSPDXZJFG-UHFFFAOYSA-N	244872	C(CCCCCCCCCCC(=O)O)CCCCCCCCCC(=O)O	0.678844	0.967249
etiocholanolone glucuronide	VFUIRAVTUVCQTF-UHFFFAOYSA-N	270605	CC12CCC(CC1CCC3C2CCC4(C3CCC4=O)C)OC5C(C(C(C(O5)C(=O)O)O)O)O	0.462309	0.957777
N-acetylproline	GNMSLDIYJOSUSW-UHFFFAOYSA-N	322640	CC(=O)N1CCCC1C(=O)O	0.965006	1.00564
cys-gly, oxidized	KDJVKDYFFTWHBO-UHFFFAOYSA-N	333293	C(C(C(=O)NCC(=O)O)N)SSCC(C(=O)NCC(=O)O)N	0.0201114	1.31428
taurochenodeoxycholate	BHTRKEVKTKCXOH-BJLOMENOSA-N	387316	C[C@H](CCC(=O)NCCS(=O)(=O)O)[C@H]1CC[C@@H]2[C@@]1(CC[C@H]3[C@H]2[C@@H](C[C@H]4[C@@]3(CC[C@H](C4)O)C)O)C	0.406548	1.07693
5-methylthioadenosine (MTA)	WUUGFSXJNOTRMR-IOSLPCCCSA-N	439176	CSC[C@@H]1[C@H]([C@H]([C@@H](O1)N2C=NC3=C2N=CN=C3N)O)O	0.248808	0.876929
N-acetylneuraminate	SQVRNKJHWKZAKO-LUWBGTNYSA-N	439197	CC(=O)N[C@@H]1[C@H](CC(O[C@H]1[C@@H]([C@@H](CO)O)O)(C(=O)O)O)O	0.636124	0.950206
formiminoglutamate	NRXIKWMTVXPVEF-BYPYZUCNSA-N	439233	C(CC(=O)O)[C@@H](C(=O)O)N=CN	0.806385	0.987408
cystathionine	ILRYLPWNYFXEMH-WHFBIAKZSA-N	439258	C(CSC[C@@H](C(=O)O)N)[C@@H](C(=O)O)N	0.190938	0.870514
O-acetylhomoserine	FCXZBWSIAGGPCB-YFKPBYRVSA-N	439389	CC(=O)OCC[C@@H](C(=O)O)N	0.978983	1.00621
cysteinylglycine	ZUKPVRWZDMRIEO-VKHMYHEASA-N	439498	C([C@@H](C(=O)NCC(=O)O)N)S	0.0294554	1.32443
2-aminobutyrate	QWCKQJZIFLGMSD-GSVOUGTGSA-N	439691	CC[C@H](C(=O)O)N	0.0500245	0.967818
N-formylmethionine	PYUSHNKNPOHWEZ-YFKPBYRVSA-N	439750	CSCC[C@@H](C(=O)O)NC=O	0.960249	0.986968
butyrylcarnitine (C4)	QWYFHHGCZUCMBN-UHFFFAOYSA-N	439829	CCCC(=O)OC(CC(=O)[O-])C[N+](C)(C)C	0.103492	0.85858
taurolithocholate 3-sulfate	HSNPMXROZIQAQD-GBURMNQMSA-N	440071	C[C@H](CCC(=O)NCCS(=O)(=O)O)[C@H]1CC[C@@H]2[C@@]1(CC[C@H]3[C@H]2CC[C@H]4[C@@]3(CC[C@H](C4)OS(=O)(=O)O)C)C	0.308829	1.02456
gamma-glutamylalanine	WQXXXVRAFAKQJM-WHFBIAKZSA-N	440103	C[C@@H](C(=O)O)NC(=O)CC[C@@H](C(=O)O)N	0.30135	1.14971
N6,N6,N6-trimethyllysine	MXNRLFUSFKVQSK-QMMMGPOBSA-N	440120	C[N+](C)(C)CCCC[C@@H](C(=O)[O-])N	0.0997376	0.852894
imidazole lactate	ACZFBYCNAVEFLC-YFKPBYRVSA-N	440129	C1=C(NC=N1)C[C@@H](C(=O)O)O	0.292613	0.975219
N1-Methyl-4-pyridone-3-carboxamide	KTLRWTOPTKGYQY-UHFFFAOYSA-N	440810	CN1C=CC(=O)C(=C1)C(=O)N	0.187521	0.780117
homostachydrine*	XULZWQRXYTVUTE-ZETCQYMHSA-N	441447	C[N+]1(CCCC[C@H]1C(=O)[O-])C	0.113444	0.954506
tryptophan betaine	AOHCBEAZXHZMOR-ZDUSSCGKSA-N	442106	C[N+](C)(C)[C@@H](CC1=CNC2=CC=CC=C21)C(=O)[O-]	0.41026	0.932501
maleate	VZCYOOQTPOCHFL-UPHRSURJSA-N	444266	C(=C\C(=O)O)\C(=O)O	0.831393	1.0262
glucuronate	AEMOLEFTQBMNLQ-WAXACMCWSA-N	444791	[C@@H]1([C@@H]([C@H](O[C@@H]([C@@H]1O)O)C(=O)O)O)O	0.450208	1.03425
arachidonate (20:4n6)	YZXBAPSDXZZRGB-DOFZRALJSA-N	444899	CCCCC/C=C\C/C=C\C/C=C\C/C=C\CCCC(=O)O	0.284704	0.95132
fumarate	VZCYOOQTPOCHFL-OWOJBTEDSA-N	444972	C(=C/C(=O)O)\C(=O)O	0.013044	1.15584
retinol (Vitamin A)	FPIPGXGPPPQFEQ-OVSJKPMPSA-N	445354	CC1=C(C(CCC1)(C)C)/C=C/C(=C/C=C/C(=C/CO)/C)/C	0.228232	0.973037
5-methyluridine (ribothymidine)	DWRXFEITVBNRMK-JXOAFFINSA-N	445408	CC1=CN(C(=O)NC1=O)[C@H]2[C@@H]([C@@H]([C@H](O2)CO)O)O	0.893037	0.986827
docosahexaenoate (DHA; 22:6n3)	MBMBGCFOFBJSGT-KUBAVDMBSA-N	445580	CC/C=C\C/C=C\C/C=C\C/C=C\C/C=C\C/C=C\CCC(=O)O	0.268402	0.915244
palmitoleate (16:1n7)	SECPZKHBENQXJG-FPLPWBNLSA-N	445638	CCCCCC/C=C\CCCCCCCC(=O)O	0.0822781	0.817923
eicosapentaenoate (EPA; 20:5n3)	JAZBEHYOTPTENJ-JLNKQSITSA-N	446284	CC/C=C\C/C=C\C/C=C\C/C=C\C/C=C\CCCC(=O)O	0.376125	1.0354
N-acetylmethionine	XUYPXLNMDZIRQH-LURJTMIESA-N	448580	CC(=O)N[C@@H](CCSC)C(=O)O	0.733089	0.938675
3-hydroxyhippurate	XDOFWFNMYJRHEW-UHFFFAOYSA-N	450268	C1=CC(=CC(=C1)O)C(=O)NCC(=O)O	0.924785	0.957424
1,2-dipalmitoyl-GPC (16:0/16:0)	KILNVBDSWZSGLL-KXQOOQHDSA-N	452110	CCCCCCCCCCCCCCCC(=O)OC[C@H](COP(=O)([O-])OCC[N+](C)(C)C)OC(=O)CCCCCCCCCCCCCCC	0.0437306	0.947799
1-stearoyl-GPC (18:0)	IHNKQIMGVNPMTC-RUZDIDTESA-N	497299	CCCCCCCCCCCCCCCCCC(=O)OC[C@H](COP(=O)([O-])OCC[N+](C)(C)C)O	0.0433905	1.08652
O-sulfo-L-tyrosine	CIQHWLTYGMYQQR-QMMMGPOBSA-N	514186	C1=CC(=CC=C1C[C@@H](C(=O)O)N)OS(=O)(=O)O	0.985265	0.992404
piperine	MXXWOMGUGJBKIW-YPCIICBESA-N	638024	C1CCN(CC1)C(=O)/C=C/C=C/C2=CC3=C(C=C2)OCO3	0.48408	0.969304
flavin adenine dinucleotide (FAD)	VWWQXMAJTJZDQX-UYBVJOGSSA-N	643975	CC1=CC2=C(C=C1C)N(C3=NC(=O)NC(=O)C3=N2)C[C@@H]([C@@H]([C@@H](COP(=O)(O)OP(=O)(O)OC[C@@H]4[C@H]([C@H]([C@@H](O4)N5C=NC6=C5N=CN=C6N)O)O)O)O)O	0.787135	0.960763
N-acetyltryptophan	DZTHIGRZJZPRDV-LBPRGKRZSA-N	700653	CC(=O)N[C@@H](CC1=CNC2=CC=CC=C21)C(=O)O	0.64671	0.956401
cinnamoylglycine	YAADMLWHGMUGQL-VOTSOKGWSA-N	709625	C1=CC=C(C=C1)/C=C/C(=O)NCC(=O)O	0.85298	1.03249
trans-urocanate	LOIYMIARKYCTBW-OWOJBTEDSA-N	736715	C1=C(NC=N1)/C=C/C(=O)O	0.153898	0.872391
N-formylphenylalanine	NSTPXGARCQOSAU-VIFPVBQESA-N	759256	C1=CC=C(C=C1)C[C@@H](C(=O)O)NC=O	0.0790053	0.641348
3-methylglutaconate	WKRBKYFIJPGYQC-DUXPYHPUSA-N	1551553	C/C(=C\C(=O)O)/CC(=O)O	0.914402	0.983528
taurodeoxycholate	AWDRATDZQPNJFN-VAYUFCLWSA-N	2733768	C[C@H](CCC(=O)NCCS(=O)(=O)O)[C@H]1CC[C@@H]2[C@@]1([C@H](C[C@H]3[C@H]2CC[C@H]4[C@@]3(CC[C@H](C4)O)C)O)C	0.773631	1.02672
erythronate*	JPIJQSOTBSSVTP-PWNYCUMCSA-N	2781043	C([C@H]([C@H](C(=O)O)O)O)O	0.711162	1.00802
ergothioneine	SSISHJJTAXXQAX-UHFFFAOYSA-N	3032311	C[N+](C)(C)C(CC1=CNC(=S)N1)C(=O)[O-]	0.323658	1.05031
glycodeoxycholate	WVULKSPCQVQLCU-BUXLTGKBSA-N	3035026	C[C@H](CCC(=O)NCC(=O)O)[C@H]1CC[C@@H]2[C@@]1([C@H](C[C@H]3[C@H]2CC[C@H]4[C@@]3(CC[C@H](C4)O)C)O)C	0.911608	0.960677
3beta,7alpha-dihydroxy-5-cholestenoate	GYJSAWZGYQXRBS-GRJZKGIBSA-N	3081084	C[C@H](CCCC(C)C(=O)O)[C@H]1CC[C@@H]2[C@@]1(CC[C@H]3[C@H]2[C@@H](C=C4[C@@]3(CC[C@@H](C4)O)C)O)C	0.775061	0.96741
7-alpha-hydroxy-3-oxo-4-cholestenoate (7-Hoca)	SATGKQGFUDXGAX-MYWFJNCASA-N	3081085	C[C@H](CCCC(C)C(=O)O)[C@H]1CC[C@@H]2[C@@]1(CC[C@H]3[C@H]2[C@@H](CC4=CC(=O)CC[C@]34C)O)C	0.852022	0.999723
17-methylstearate	YETXGSGCWODRAA-UHFFFAOYSA-N	3083779	CC(C)CCCCCCCCCCCCCCCC(=O)O	0.507074	1.09043
catechol sulfate	MZPWKJZDOCIALD-UHFFFAOYSA-N	3083879	C1=CC=C(C(=C1)O)OS(=O)(=O)O	0.836039	0.98439
gamma-glutamyltryptophan	CATMPQFFVNKDEY-UHFFFAOYSA-N	3989307	C1=CC=C2C(=C1)C(=CN2)CC(C(=O)O)NC(=O)CCC(C(=O)O)N	0.494096	0.95352
cysteine-glutathione disulfide	BNRXZEPOHPEEAS-UHFFFAOYSA-N	4247235	C(CC(=O)NC(CSSCC(C(=O)O)N)C(=O)NCC(=O)O)C(C(=O)O)N	0.213186	1.14535
p-cresol sulfate	WGNAKZGUSRVWRH-UHFFFAOYSA-N	4615423	CC1=CC=C(C=C1)OS(=O)(=O)O	0.937428	1.00269
bilirubin (Z,Z)	BPYKTIZUTYGOLE-IFADSCNNSA-N	5280352	CC1=C(NC(=C1CCC(=O)O)CC2=C(C(=C(N2)/C=C\3/C(=C(C(=O)N3)C)C=C)C)CCC(=O)O)/C=C\4/C(=C(C(=O)N4)C=C)C	0.492582	1.01059
linoleate (18:2n6)	OYHQOLUKZRVURQ-HZJYTTRNSA-N	5280450	CCCCC/C=C\C/C=C\CCCCCCCC(=O)O	0.114221	0.909584
dihomo-linolenate (20:3n3 or n6)	HOBAELRKJCKHQD-QNEBEIHSSA-N	5280581	CCCCC/C=C\C/C=C\C/C=C\CCCCCCC(=O)O	0.838181	0.987808
linolenate [alpha or gamma; (18:3n3 or 6)]	DTOSIQBPPRVQHS-PDBXOOCHSA-N	5280934	CC/C=C\C/C=C\C/C=C\CCCCCCCC(=O)O	0.19003	0.988346
erucate (22:1n9)	DPUOLQHDNGRHBS-KTKRTIGZSA-N	5281116	CCCCCCCC/C=C\CCCCCCCCCCCC(=O)O	0.326162	1.07476
myristoleate (14:1n5)	YWWVWXASSLXJHU-WAYWQWQTSA-N	5281119	CCCC/C=C\CCCCCCCC(=O)O	0.289285	0.954005
nervonate (24:1n9)*	GWHCXVQVJPWHRF-KTKRTIGZSA-N	5281120	CCCCCCCC/C=C\CCCCCCCCCCCCCC(=O)O	0.562478	1.07291
1-arachidonylglycerol (20:4)	DCPCOKIYJYGMDN-DOFZRALJSA-N	5282281	CCCCC/C=C\C/C=C\C/C=C\C/C=C\CCCC(=O)OCC(CO)O	0.189027	1.93071
eicosenoate (20:1)	BITHHVVYSMSWAG-KTKRTIGZSA-N	5282768	CCCCCCCC/C=C\CCCCCCCCCC(=O)O	0.150057	1.19061
docosadienoate (22:2n6)	HVGRZDASOHMCSK-AVQMFFATSA-N	5282807	CCCCC/C=C/C/C=C/CCCCCCCCCCCC(=O)O	0.227219	1.1272
oleamide	FATBGEAMYMYZAF-KTKRTIGZSA-N	5283387	CCCCCCCC/C=C\CCCCCCCC(=O)N	0.35	1.15009
linoleoyl ethanolamide	KQXDGUVSAAQARU-HZJYTTRNSA-N	5283446	CCCCC/C=C\C/C=C\CCCCCCCC(=O)NCCO	3.32248e-05	1.68553
oleoyl ethanolamide	BOWVQLFMWHZBEF-KTKRTIGZSA-N	5283454	CCCCCCCC/C=C\CCCCCCCC(=O)NCCO	0.000256659	1.43259
1-oleoylglycerol (18:1)	RZRNAYUHWVFMIP-KTKRTIGZSA-N	5283468	CCCCCCCC/C=C\CCCCCCCC(=O)OCC(CO)O	0.173424	1.36463
1-linoleoylglycerol (18:2)	WECGLUPZRHILCT-HZJYTTRNSA-N	5283469	CCCCC/C=C\C/C=C\CCCCCCCC(=O)OCC(CO)O	0.0744847	1.78022
1-palmitoyl-2-oleoyl-GPE (16:0/18:1)	FHQVHHIBKUMWTI-OTMQOFQLSA-N	5283496	CCCCCCCCCCCCCCCC(=O)OC[C@H](COP(=O)(O)OCCN)OC(=O)CCCCCCC/C=C\CCCCCCCC	0.755372	1.01248
sphingosine 1-phosphate	DUYSYHSSBDVJSM-KRWOKUGFSA-N	5283560	CCCCCCCCCCCCC/C=C/[C@H]([C@H](COP(=O)(O)O)N)O	0.053511	1.95981
N-palmitoyl-sphingosine (d18:1/16:0)	YDNKGFDKKRUKPY-TURZORIXSA-N	5283564	CCCCCCCCCCCCCCCC(=O)N[C@@H](CO)[C@@H](/C=C/CCCCCCCCCCCCC)O	0.287498	1.05942
N-stearoyl-sphingosine (d18:1/18:0)*	VODZWWMEJITOND-NXCSZAMKSA-N	5283565	CCCCCCCCCCCCCCCCCC(=O)N[C@@H](CO)[C@@H](/C=C/CCCCCCCCCCCCC)O	0.38585	1.02409
N-palmitoyl-sphinganine (d18:0/16:0)	GCGTXOVNNFGTPQ-JHOUSYSJSA-N	5283572	CCCCCCCCCCCCCCC[C@H]([C@H](CO)NC(=O)CCCCCCCCCCCCCCC)O	0.536361	0.999742
N-stearoyl-sphinganine (d18:0/18:0)*	KZTJQXAANJHSCE-OIDHKYIRSA-N	5283573	CCCCCCCCCCCCCCCCCC(=O)N[C@@H](CO)[C@@H](CCCCCCCCCCCCCCC)O	0.232815	0.931898
1-palmitoyl-2-linoleoyl-GPC (16:0/18:2)	JLPULHDHAOZNQI-ZTIMHPMXSA-N	5287971	CCCCCCCCCCCCCCCC(=O)OC[C@H](COP(=O)([O-])OCC[N+](C)(C)C)OC(=O)CCCCCCC/C=C\C/C=C\CCCCC	0.703081	0.99073
1,2-dilinoleoyl-GPC (18:2/18:2)	FVXDQWZBHIXIEJ-LNDKUQBDSA-N	5288075	CCCCC/C=C\C/C=C\CCCCCCCC(=O)OC[C@H](COP(=O)([O-])OCC[N+](C)(C)C)OC(=O)CCCCCCC/C=C\C/C=C\CCCCC	0.0480856	1.06402
1-stearoyl-2-arachidonoyl-GPE (18:0/20:4)	ANRKEHNWXKCXDB-BHFWLYLHSA-N	5289133	CCCCCCCCCCCCCCCCCC(=O)OC[C@H](COP(=O)(O)OCCN)OC(=O)CCC/C=C\C/C=C\C/C=C\C/C=C\CCCCC	0.75658	0.964048
5-dodecenoate (12:1n7)	IJBFSOLHRKELLR-FPLPWBNLSA-N	5312378	CCCCCC/C=C\CCCC(=O)O	0.524662	1.03341
10-heptadecenoate (17:1n7)	GDTXICBNEOEPAZ-FPLPWBNLSA-N	5312435	CCCCCC/C=C\CCCCCCCCC(=O)O	0.0632649	0.832082
stearidonate (18:4n3)	JIWBIWFOSCKQMA-LTKCOYKYSA-N	5312508	CC/C=C\C/C=C\C/C=C\C/C=C\CCCCC(=O)O	0.785801	0.905217
10-nonadecenoate (19:1n9)	BBOWBNGUEWHNQZ-KTKRTIGZSA-N	5312513	CCCCCCCC/C=C\CCCCCCCCC(=O)O	0.320247	1.10025
2-hydroxynervonate*	UFOOFOUFKSIFCD-KTKRTIGZSA-N	5312783	CCCCCCCC/C=C\CCCCCCCCCCCCC(C(=O)O)O	0.559366	1.05576
bilirubin (E,E)*	BPYKTIZUTYGOLE-BMNRKXRESA-N	5315454	CC1=C(NC(=C1CCC(=O)O)CC2=C(C(=C(N2)/C=C/3\C(=C(C(=O)N3)C)C=C)C)CCC(=O)O)/C=C/4\C(=C(C(=O)N4)C=C)C	0.893237	1.0243
biliverdin	RCNSAJSGRJSBKK-YKSNQIBWSA-N	5353439	CC\1=C(/C(=C/C2=C(C(=C(N2)/C=C\3/C(=C(C(=O)N3)C)C=C)C)CCC(=O)O)/N/C1=C/C4=NC(=O)C(=C4C)C=C)CCC(=O)O	0.201035	0.921188
sphingosine	WWUZIQQURGPMPG-CCEZHUSRSA-N	5353955	CCCCCCCCCCCCC/C=C/C(C(CO)N)O	0.00762019	1.26119
ribonate	QXKAIJAYHKCRRA-BXXZVTAOSA-N	5460677	C([C@H]([C@H]([C@H](C(=O)O)O)O)O)O	0.570681	1.21936
adrenate (22:4n6)	TWSWSIQAPQLDBP-DOFZRALJSA-N	5497181	CCCCC/C=C\C/C=C\C/C=C\C/C=C\CCCCCC(=O)O	0.473793	1.04332
bilirubin (E,Z or Z,E)*	BPYKTIZUTYGOLE-VVCLLGATSA-N	5799469	CC1=C(NC(=C1CCC(=O)O)CC2=C(C(=C(N2)/C=C/3\C(=C(C(=O)N3)C)C=C)C)CCC(=O)O)/C=C\4/C(=C(C(=O)N4)C=C)C	0.108223	1.14794
beta-cryptoxanthin	DMASLKHVQRHNES-QQGJMDNJSA-N	6384256	CC1=C(C(CCC1)(C)C)/C=C/C(=C/C=C/C(=C/C=C/C=C(\C)/C=C/C=C(\C)/C=C/C2=C(CC(CC2(C)C)O)C)/C)/C	0.94831	1.00239
4-vinylphenol sulfate	IETVQHUKTKKBFF-UHFFFAOYSA-N	6426766	C=CC1=CC=C(C=C1)OS(=O)(=O)O	0.699735	0.960981
isovalerylcarnitine (C5)	IGQBPDJNUXPEMT-UHFFFAOYSA-N	6426851	CC(C)CC(=O)OC(CC(=O)[O-])C[N+](C)(C)C	0.44029	0.937909
hexanoylcarnitine (C6)	VVPRQWTYSNDTEA-UHFFFAOYSA-N	6426853	CCCCCC(=O)OC(CC(=O)[O-])C[N+](C)(C)C	0.209285	1.03586
myristoylcarnitine (C14)	PSHXNVGSVNEJBD-UHFFFAOYSA-N	6426854	CCCCCCCCCCCCCC(=O)OC(CC(=O)[O-])C[N+](C)(C)C	0.0344096	1.07791
stearoylcarnitine (C18)	FNPHNLNTJNMAEE-UHFFFAOYSA-N	6426855	CCCCCCCCCCCCCCCCCC(=O)OC(CC(=O)[O-])C[N+](C)(C)C	0.00350955	1.0943
2-methylbutyrylcarnitine (C5)	IHCPDBBYTYJYIL-UHFFFAOYSA-N	6426901	CCC(C)C(=O)OC(CC(=O)[O-])C[N+](C)(C)C	0.579295	1.01212
linoleamide (18:2n6)	SFIHQZFZMWZOJV-HZJYTTRNSA-N	6435901	CCCCC/C=C\C/C=C\CCCCCCCC(=O)N	0.621145	1.07687
1-palmitoyl-2-oleoyl-GPC (16:0/18:1)	WTJKGGKOPKCXLL-MRCUWXFGSA-N	6436017	CCCCCCCCCCCCCCCC(=O)OCC(COP(=O)([O-])OCC[N+](C)(C)C)OC(=O)CCCCCCC/C=C\CCCCCCCC	0.114693	0.96513
dihomo-linoleate (20:2n6)	XSXIVVZCUAHUJO-HZJYTTRNSA-N	6439848	CCCCC/C=C\C/C=C\CCCCCCCCCC(=O)O	0.482651	1.06352
oleoylcarnitine (C18:1)	IPOLTUVFXFHAHI-SEYXRHQNSA-N	6441392	CCCCCCCC/C=C\CCCCCCCC(=O)OC(CC(=O)[O-])C[N+](C)(C)C	3.47368e-05	1.31422
docosapentaenoate (n3 DPA; 22:5n3)	AVKOENOBFIYBSA-WMPRHZDHSA-N	6441454	CCCCC/C=C\C/C=C\C/C=C\C/C=C\C/C=C\CCC(=O)O	0.069905	0.835117
1-palmitoyl-2-docosahexaenoyl-GPC (16:0/22:6)	IESVDEZGAHUQJU-ZLBXKVHBSA-N	6441886	CCCCCCCCCCCCCCCC(=O)OC[C@H](COP(=O)([O-])OCC[N+](C)(C)C)OC(=O)CC/C=C\C/C=C\C/C=C\C/C=C\C/C=C\C/C=C\CC	0.819671	0.999044
sphingomyelin (d18:1/18:1, d18:2/18:0)	NBEADXWAAWCCDG-QDDWGVBQSA-N	6443882	CCCCCCCCCCCCC/C=C/[C@H]([C@H](COP(=O)([O-])OCC[N+](C)(C)C)NC(=O)CCCCCCC/C=C\CCCCCCCC)O	0.0266522	1.04089
sphingadienine	KWDXKYNWAKMLKK-YQMRQDNGSA-N	6449795	CCC/C=C\CCCCCCCC/C=C/C(C(CO)N)O	0.00958901	1.52226
linoleoylcarnitine (C18:2)*	MJLXQSQYKZWZCB-DQFWFXSYSA-N	6450015	CCCCC/C=C\C/C=C\CCCCCCCC(=O)O[C@H](CC(=O)[O-])C[N+](C)(C)C	1.08334e-05	1.43602
stearoyl sphingomyelin (d18:1/18:0)	LKQLRGMMMAHREN-YJFXYUILSA-N	6453725	CCCCCCCCCCCCCCCCCC(=O)N[C@@H](COP(=O)([O-])OCC[N+](C)(C)C)[C@@H](/C=C/CCCCCCCCCCCCC)O	0.349491	0.973507
gamma-glutamylmethionine	RQNSKRXMANOPQY-BQBZGAKWSA-N	7009567	CSCC[C@@H](C(=O)O)NC(=O)CC[C@@H](C(=O)O)N	0.0625954	1.07722
gamma-glutamylvaline	AQAKHZVPOOGUCK-XPUUQOCRSA-N	7015683	CC(C)[C@@H](C(=O)O)NC(=O)CC[C@@H](C(=O)O)N	0.91655	0.987125
gamma-glutamyl-epsilon-lysine	JPKNLFVGUZRHOB-YUMQZZPRSA-N	7015685	C(CCNC(=O)CC[C@@H](C(=O)O)N)C[C@@H](C(=O)O)N	0.319842	1.14517
gamma-glutamylhistidine	PXVCMZCJAUJLJP-YUMQZZPRSA-N	7017195	C1=C(NC=N1)C[C@@H](C(=O)O)NC(=O)CC[C@@H](C(=O)O)N	0.292749	1.1731
palmitoyl-linoleoyl-glycerol (16:0/18:2) [1]*	SVXWJFFKLMLOHO-YAIZGCQRSA-N	9543695	CCCCCCCCCCCCCCCC(=O)OC[C@H](CO)OC(=O)CCCCCCC/C=C\C/C=C\CCCCC	0.967275	1.0999
1-palmitoyl-2-linoleoyl-GPE (16:0/18:2)	HBZNVZIRJWODIB-NHCUFCNUSA-N	9546747	CCCCCCCCCCCCCCCC(=O)OC[C@H](COP(=O)(O)OCCN)OC(=O)CCCCCCC/C=C\C/C=C\CCCCC	0.660752	1.03402
1-stearoyl-2-linoleoyl-GPE (18:0/18:2)*	YDTWOEYVDRKKCR-KNERPIHHSA-N	9546749	CCCCCCCCCCCCCCCCCC(=O)OC[C@H](COP(=O)(O)OCCN)OC(=O)CCCCCCC/C=C\C/C=C\CCCCC	0.718664	0.979807
1-oleoyl-2-linoleoyl-GPE (18:1/18:2)*	GKAFCSRKMWFPSJ-RJXNKANHSA-N	9546753	CCCCCCCC/C=C\CCCCCCCC(=O)OC[C@H](COP(=O)(O)OCCN)OC(=O)CCCCCCC/C=C\C/C=C\CCCCC	0.645316	1.0252
1-stearoyl-2-docosahexaenoyl-GPE (18:0/22:6)*	XYYHNDVKALDFHQ-OXHZBIAZSA-N	9546798	CCCCCCCCCCCCCCCCCC(=O)OC[C@H](COP(=O)(O)OCCN)OC(=O)CC/C=C\C/C=C\C/C=C\C/C=C\C/C=C\C/C=C\CC	0.458435	0.841115
1-palmitoyl-2-docosahexaenoyl-GPE (16:0/22:6)*	MPWUZHVZZKSTPV-MADBQMNMSA-N	9546799	CCCCCCCCCCCCCCCC(=O)OC[C@H](COP(=O)(O)OCCN)OC(=O)CC/C=C\C/C=C\C/C=C\C/C=C\C/C=C\C/C=C\CC	0.2764	1.17255
1-palmitoyl-2-arachidonoyl-GPE (16:0/20:4)*	DRIVXEVMDWCWLI-CAQMIEAISA-N	9546800	CCCCCCCCCCCCCCCC(=O)OC[C@H](COP(=O)(O)OCCN)OC(=O)CCC/C=C\C/C=C\C/C=C\C/C=C\CCCCC	0.527656	1.03291
1-(1-enyl-stearoyl)-2-arachidonoyl-GPE (P-18:0/20:4)*	URPXXNCTXCOATD-FXMFQVEGSA-N	9547058	CCCCCCCCCCCCCCCC/C=C\OC[C@H](COP(=O)(O)OCCN)OC(=O)CCC/C=C\C/C=C\C/C=C\C/C=C\CCCCC	0.551782	1.06165
1-stearoyl-GPE (18:0)	BBYWOYAFBUOUFP-JOCHJYFZSA-N	9547068	CCCCCCCCCCCCCCCCCC(=O)OC[C@H](COP(=O)(O)OCCN)O	0.34008	1.15383
1-palmitoyl-GPE (16:0)	YVYMBNSKXOXSKW-HXUWFJFHSA-N	9547069	CCCCCCCCCCCCCCCC(=O)OC[C@H](COP(=O)(O)OCCN)O	0.117972	1.13651
1-oleoyl-GPE (18:1)	PYVRVRFVLRNJLY-MZMPXXGTSA-N	9547071	CCCCCCCC/C=C\CCCCCCCC(=O)OC[C@H](COP(=O)(O)OCCN)O	0.415754	1.01598
9-hydroxystearate	RKHXDCVAPIMDMG-UHFFFAOYSA-N	9570127	CCCCCCCCCC(CCCCCCCC(=O)O)O	0.218496	0.991259
gulonate*	RGHNJXZEOKUKBD-NRXMZTRTSA-N	9794176	C([C@@H]([C@H]([C@H]([C@H](C(=O)O)O)O)O)O)O	0.490888	1.06971
N-acetylcarnosine	BKAYIFDRRZZKNF-VIFPVBQESA-N	9903482	CC(=O)NCCC(=O)N[C@@H](CC1=CN=CN1)C(=O)O	0.792458	1.00769
N-delta-acetylornithine	SRXKAYJJGAAOBP-UHFFFAOYSA-N	9920500	CC(=O)NCCCC(C(=O)O)N	0.201823	1.00691
epiandrosterone sulfate	ZMITXKRGXGRMKS-LUJOEAJASA-N	9929317	C[C@]12CC[C@@H](C[C@@H]1CC[C@@H]3[C@@H]2CC[C@]4([C@H]3CCC4=O)C)OS(=O)(=O)O	0.782984	0.959894
palmitoyl sphingomyelin (d18:1/16:0)	RWKUXQNLWDTSLO-GWQJGLRPSA-N	9939941	CCCCCCCCCCCCCCCC(=O)N[C@@H](COP(=O)([O-])OCC[N+](C)(C)C)[C@@H](/C=C/CCCCCCCCCCCCC)O	0.0032825	1.03519
palmitoyl dihydrosphingomyelin (d18:0/16:0)*	QHZIGNLCLJPLCU-QPPIDDCLSA-N	9939965	CCCCCCCCCCCCCCC[C@H]([C@H](COP(=O)([O-])OCC[N+](C)(C)C)NC(=O)CCCCCCCCCCCCCCC)O	0.193593	1.03911
9,10-DiHOME	XEBKSQSGNGRGDW-YFHOEESVSA-N	9966640	CCCCC/C=C\CC(C(CCCCCCCC(=O)O)O)O	0.777128	1.05776
1-methylnicotinamide	LDHMAVIPBRSVRG-UHFFFAOYSA-N	10129985	C[N+]1=CC=CC(=C1)C(=N)[O-]	0.45356	0.979691
12,13-DiHOME	CQSLTKIXAJTQGA-FLIBITNWSA-N	10236635	CCCCCC(C(C/C=C\CCCCCCCC(=O)O)O)O	0.101457	1.52959
decanoylcarnitine (C10)	LZOSYCMHQXPBFU-UHFFFAOYSA-N	10245190	CCCCCCCCCC(=O)OC(CC(=O)[O-])C[N+](C)(C)C	0.562293	1.00988
laurylcarnitine (C12)	FUJLYHJROOYKRA-UHFFFAOYSA-N	10427569	CCCCCCCCCCCC(=O)OC(CC(=O)[O-])C[N+](C)(C)C	0.4488	1.03465
1-palmitoyl-2-arachidonoyl-GPC (16:0/20:4n6)	IIZPXYDJLKNOIY-JXPKJXOSSA-N	10747814	CCCCCCCCCCCCCCCC(=O)OC[C@H](COP(=O)([O-])OCC[N+](C)(C)C)OC(=O)CCC/C=C\C/C=C\C/C=C\C/C=C\CCCCC	0.181359	0.97417
1-(1-enyl-palmitoyl)-GPC (P-16:0)*	HTZINLFNXLXRBC-CQLBIITFSA-N	10917802	CCCCCCCCCCCCCC/C=C\OC[C@H](COP(=O)([O-])OCC[N+](C)(C)C)O	0.0133663	1.16617
C-glycosyltryptophan	CPXSBHKDEPPWIX-RAYCSJGISA-N	10981970	C1=CC=C2C(=C1)C(=C(N2)[C@@H]3[C@H]([C@H]([C@@H]([C@H](O3)CO)O)O)O)C[C@@H](C(=O)O)N	0.972748	0.998109
cholesterol	HVYWMOMLDIMFJA-FNOPAARDSA-N	11025495	C[C@H](CCCC(C)C)[C@H]1CC[C@@H]2[C@@]1(CC[C@H]3[C@H]2CC=C4[C@@]3(CCC(C4)O)C)C	0.291176	0.963126
1-(1-enyl-palmitoyl)-2-palmitoyl-GPC (P-16:0/16:0)*	PEWXKAOBUSBJLD-MCBGMKGZSA-N	11146967	CCCCCCCCCCCCCCCC(=O)O[C@H](CO/C=C\CCCCCCCCCCCCCC)COP(=O)([O-])OCC[N+](C)(C)C	0.826559	0.994882
N-methylpipecolate	BPSLZWSRHTULGU-ZCFIWIBFSA-N	11286529	CN1CCCC[C@@H]1C(=O)O	0.421769	0.94625
sphingomyelin (d18:1/14:0, d16:1/16:0)*	KYICBZWZQPCUMO-PSALXKTOSA-N	11433862	CCCCCCCCCCCCC/C=C/[C@H]([C@H](COP(=O)([O-])OCC[N+](C)(C)C)NC(=O)CCCCCCCCCCCCC)O	0.175099	0.959343
pro-hydroxy-pro	ONPXCLZMBSJLSP-ALKRTJFJSA-N	11673055	C1C[C@H](NC1)C(=O)N2CC(C[C@H]2C(=O)O)O	0.713154	1.01378
1-linoleoyl-GPC (18:2)	SPJFYYJXNPEZDW-UTJQPWESSA-N	11988421	CCCCC/C=C\C/C=C\CCCCCCCC(=O)OCC(COP(=O)([O-])OCC[N+](C)(C)C)O	0.253295	1.04208
glycoursodeoxycholate	GHCZAUBVMUEKKP-XROMFQGDSA-N	12310288	C[C@H](CCC(=O)NCC(=O)O)[C@H]1CC[C@@H]2[C@@]1(CC[C@H]3[C@H]2[C@H](C[C@H]4[C@@]3(CC[C@H](C4)O)C)O)C	0.499484	1.05526
androstenediol (3beta,17beta) monosulfate (1)	HXJFCUUBVWOORF-LOVVWNRFSA-N	13847309	C[C@]12CC[C@H]3[C@H]([C@@H]1CC[C@@H]2O)CC=C4[C@@]3(CC[C@@H](C4)OS(=O)(=O)O)C	0.903001	0.999069
gamma-glutamylisoleucine*	SNCKGJWJABDZHI-UHFFFAOYSA-N	14253342	CCC(C)C(C(=O)O)NC(=O)CCC(C(=O)O)N	0.546671	0.921634
2-palmitoyl-GPC (16:0)*	NEGQHKSYEYVFTD-HSZRJFAPSA-N	15061532	CCCCCCCCCCCCCCCC(=O)O[C@H](CO)COP(=O)([O-])OCC[N+](C)(C)C	0.129483	1.14179
1-oleoyl-GPC (18:1)	YAMUFBLWGFFICM-PTGWMXDISA-N	16081932	CCCCCCCC/C=C\CCCCCCCC(=O)OC[C@H](COP(=O)([O-])OCC[N+](C)(C)C)O	0.0137391	1.10505
1-stearoyl-2-arachidonoyl-GPC (18:0/20:4)	PSVRFUPOQYJOOZ-QNPWAGBNSA-N	16219824	CCCCCCCCCCCCCCCCCC(=O)OC[C@H](COP(=O)([O-])OCC[N+](C)(C)C)OC(=O)CCC/C=C\C/C=C\C/C=C\C/C=C\CCCCC	0.0974985	0.985643
15-methylpalmitate	IIUXHTGBZYEGHI-UHFFFAOYSA-M	17903417	CC(C)CCCCCCCCCCCCCC(=O)[O-]	0.757366	1.01234
1-palmitoleoyl-GPC (16:1)*	LFUDDCMNKWEORN-ZXEGGCGDSA-N	24779461	CCCCCC/C=C\CCCCCCCC(=O)OC[C@H](COP(=O)([O-])OCC[N+](C)(C)C)O	0.0288124	1.13349
1-arachidonoyl-GPE (20:4n6)*	ROPRRXYVXLDXQO-XSQXPFHXSA-N	42607465	CCCCC/C=C\C/C=C\C/C=C\C/C=C\CCCC(=O)OC[C@H](COP(=O)(O)OCCN)O	0.930951	0.99181
1-linoleoyl-GPE (18:2)*	DBHKHNGBVGWQJE-USWSLJGRSA-N	52925130	CCCCC/C=C\C/C=C\CCCCCCCC(=O)OC[C@H](COP(=O)(O)OCCN)O	0.308436	1.05611
adipoylcarnitine (C6-DC)	BSVHAXJKBCWVDA-UHFFFAOYSA-N	71296139	C[N+](C)(C)CC(CC(=O)[O-])OC(=O)CCCCC(=O)O	0.914534	0.972354
succinylcarnitine (C4-DC)	HAEVNYBCYZZDFL-UHFFFAOYSA-N	71464481	C[N+](C)(C)CC(CC(=O)[O-])OC(=O)CCC(=O)O	0.858502	1.00425
glutarylcarnitine (C5-DC)	NXJAXUYOQLTISD-UHFFFAOYSA-N	71464488	C[N+](C)(C)CC(CC(=O)[O-])OC(=O)CCCC(=O)O	0.0663171	0.844807
palmitoleoylcarnitine (C16:1)*	JFAGPSOZZSTLRF-KHPPLWFESA-N	71464547	CCCCCC/C=C\CCCCCCCC(=O)OC(CC(=O)[O-])C[N+](C)(C)C	0.0249897	1.11594
beta-citrylglutamate	GAQNUGISBQJMKO-YFKPBYRVSA-J	72715786	C(CC(=O)[O-])[C@@H](C(=O)[O-])NC(=O)C(CC(=O)[O-])(CC(=O)[O-])O	0.865251	0.943947
gamma-glutamylthreonine	GWNXFCYUJXASDX-UHFFFAOYSA-N	76078708	CC(C(C(=O)O)NC(=O)CCC(C(=O)O)N)O	0.665926	0.987485
androstenediol (3beta,17beta) disulfate (1)	UWPTUYJASNIIJM-LOVVWNRFSA-N	87120982	C[C@]12CC[C@H]3[C@H]([C@@H]1CC[C@@H]2OS(=O)(=O)O)CCC4=C[C@H](CC[C@]34C)OS(=O)(=O)O	0.861194	1.07777
myristoleoylcarnitine (C14:1)*	ABVVZYXTZLEOHP-OLHLWXQYSA-N	90659872	CCCC/C=C\CCCCCCCC(=O)O[C@H](CC(=O)[O-])C[N+](C)(C)C	0.840937	0.992644
inosine	UGQMRVRMYYASKQ-KQYNXXCUSA-N	135398641	C1=NC2=C(C(=O)N1)N=CN2[C@H]3[C@@H]([C@@H]([C@H](O3)CO)O)O	0.0521355	2.00154
7-methylguanine	FZWGECJQACGGTI-UHFFFAOYSA-N	135398679	CN1C=NC2=C1C(=O)NC(=N2)N	0.495968	0.992824
N2,N2-dimethylguanosine	RSPURTUNRHNVGF-IOSLPCCCSA-N	135501639	CN(C)C1=NC2=C(C(=O)N1)N=CN2[C@H]3[C@@H]([C@@H]([C@H](O3)CO)O)O	0.270531	0.961198

## Sheet: Compound ChemRICH
Compound.Name	InChiKeys	Pubchem.ID	SMILES	pvalue	foldchange	CID	ClusterNumber	xlogp	ClusterLabel	TreeLabels	FDR
dihydroorotate	UFIVEPVSAGBUSI-UHFFFAOYSA-N	648	C1C(NC(=O)NC1=O)C(=O)O	0	1.4	648	84	-1.675			0
arginine	ODKSFYDXXFIFQN-UHFFFAOYSA-N	232	C(CC(C(=O)O)N)CN=C(N)N	0	0.67	232	68	-3.585	Amino Acids, Basic		0
ornithine	AHLPHDHHMVZTML-BYPYZUCNSA-N	6262	C(C[C@@H](C(=O)O)N)CN	0	1.3	6262	113	-3.307	Amino Acids, Basic		0
alpha-ketobutyrate	TYEYBOSBBBHJIV-UHFFFAOYSA-N	58	CCC(=O)C(=O)O	0	0.61	58	71	-0.173	Butyrates		0
gamma-glutamylglutamine	JBFYFLXEJFQWMU-WDSKDSINSA-N	150914	C(CC(=O)N[C@@H](CCC(=O)N)C(=O)O)[C@@H](C(=O)O)N	0	1.2	150914	10	-4.904	Dipeptides		0
palmitoyl ethanolamide	HXYVTAGFYLMHSO-UHFFFAOYSA-N	4671	CCCCCCCCCCCCCCCC(=O)NCCO	0	1.4	4671	47	6.651	Ethanolamines	c	0
hypoxanthine	FDGQSTZJBFJUBT-UHFFFAOYSA-N	790	C1=NC2=C(N1)C(=O)N=CN2	0	1.8	790	1	0.556	Hypoxanthines	b	0
lactate	JVTAAEKCZFNVCJ-UHFFFAOYSA-N	612	CC(C(=O)O)O	0	1.4	612	38	-0.591	Lactates		0
oleoylcarnitine (C18:1)	IPOLTUVFXFHAHI-SEYXRHQNSA-N	6441392	CCCCCCCC/C=C\CCCCCCCC(=O)OC(CC(=O)[O-])C[N+](C)(C)C	0	1.3	6441392	30	7.271	NewCluster_30		0
linoleoylcarnitine (C18:2)*	MJLXQSQYKZWZCB-DQFWFXSYSA-N	6450015	CCCCC/C=C\C/C=C\CCCCCCCC(=O)O[C@H](CC(=O)[O-])C[N+](C)(C)C	0	1.4	6450015	30	6.944	NewCluster_30		0
sebacate (decanedioate)	CXMXRPHRNRROMY-UHFFFAOYSA-N	5192	C(CCCCC(=O)O)CCCC(=O)O	0	2.2	5192	9	2.282	O=FA_10_1		0
linoleoyl ethanolamide	KQXDGUVSAAQARU-HZJYTTRNSA-N	5283446	CCCCC/C=C\C/C=C\CCCCCCCC(=O)NCCO	0	1.7	5283446	92	6.946	Oleic Acids	h	0
oleoyl ethanolamide	BOWVQLFMWHZBEF-KTKRTIGZSA-N	5283454	CCCCCCCC/C=C\CCCCCCCC(=O)NCCO	0	1.4	5283454	92	7.273	Oleic Acids	h	0
S-1-pyrroline-5-carboxylate	DWAKNKKXGALPNW-UHFFFAOYSA-N	1196	C1CC(N=C1)C(=O)O	0	0.68	1196	80	-0.233	Pyrroles		0
5-oxoproline	ODHCTXKNWHHXJC-VKHMYHEASA-N	7405	C1CC(=O)N[C@@H]1C(=O)O	0	1.3	7405	44	-0.827	Pyrrolidinones		0
stearoyl ethanolamide	OTGQIQQTPXJQRG-UHFFFAOYSA-N	27902	CCCCCCCCCCCCCCCCCC(=O)NCCO	0.001	1.4	27902	47	7.789	Ethanolamines	c	0.44
4-hydroxyphenylpyruvate	KKADPXVIOXHVKN-UHFFFAOYSA-N	979	C1=CC(=CC=C1CC(=O)C(=O)O)O	0.001	0.71	979	108	-0.229	Pyruvates		0.44
2-keto-3-deoxy-gluconate	WPAMZTWLKIDIOP-WVZVXSGGSA-N	161227	C([C@@H]([C@@H](CO)O)O)C(=O)C(=O)O	0.001	1.3	161227	7	-2.649	Sugar Acids		0.44
acetoacetate	WDJHALXBUFZDSR-UHFFFAOYSA-N	96	CC(=O)CC(=O)O	0.002	0.81	96	125	-0.034	Keto Acids	a	0.88
palmitoyl sphingomyelin (d18:1/16:0)	RWKUXQNLWDTSLO-GWQJGLRPSA-N	9939941	CCCCCCCCCCCCCCCC(=O)N[C@@H](COP(=O)([O-])OCC[N+](C)(C)C)[C@@H](/C=C/CCCCCCCCCCCCC)O	0.003	1	9939941	31	12.896	Sphingomyelins		1
palmitoylcarnitine (C16)	XOMRRQXKHMYMOC-UHFFFAOYSA-N	461	CCCCCCCCCCCCCCCC(=O)OC(CC(=O)[O-])C[N+](C)(C)C	0.004	1.2	461	5	6.649	Carnitine		1
stearoylcarnitine (C18)	FNPHNLNTJNMAEE-UHFFFAOYSA-N	6426855	CCCCCCCCCCCCCCCCCC(=O)OC(CC(=O)[O-])C[N+](C)(C)C	0.004	1.1	6426855	5	7.787	Carnitine		1
N-acetylarginine	SNEIUMQYRCDYCH-LURJTMIESA-N	67427	CC(=O)N[C@@H](CCCN=C(N)N)C(=O)O	0.005	0.93	67427	77	-3.309	Dipeptides		1
N-acetylputrescine	KLZGKIDSEJWEDW-UHFFFAOYSA-N	122356	CC(=O)NCCCCN	0.005	0.93	122356	46	-0.35	Pyrrolidinones		1
3-methylcytidine	RDPUKVRQKWBSPK-YYNOVJQHSA-N	159649	CN1C(=N)C=CN(C1=O)[C@@H]2[C@@H]([C@@H]([C@H](O2)CO)O)O	0.006	0.82	159649	34	-1.569	Pyrimidine Nucleosides		1
sphingosine	WWUZIQQURGPMPG-CCEZHUSRSA-N	5353955	CCCCCCCCCCCCC/C=C/C(C(CO)N)O	0.008	1.3	5353955	29	6.018	Amino Alcohols		1
stearamide	LYRFLYHAGKPMFH-UHFFFAOYSA-N	31292	CCCCCCCCCCCCCCCCCC(=O)N	0.009	1.5	31292	87	7.98	Saturated_Fatty Acids		1
1-palmitoyl-GPC (16:0)	ASWBNKHCZGQVJV-UHFFFAOYSA-N	86554	CCCCCCCCCCCCCCCC(=O)OCC(COP(=O)([O-])OCC[N+](C)(C)C)O	0.009	1.1	86554	49	5.462	Saturated_Lysophosphatidylcholines		1
sphingadienine	KWDXKYNWAKMLKK-YQMRQDNGSA-N	6449795	CCC/C=C\CCCCCCCC/C=C/C(C(CO)N)O	0.01	1.5	6449795	29	5.502	Ethanolamines		1
mannose	WQZGKKKJIJFFOK-QTVWNMPRSA-N	18950	C([C@@H]1[C@H]([C@@H]([C@@H](C(O1)O)O)O)O)O	0.011	0.9	18950	48	-1.697	Hexoses		1
fumarate	VZCYOOQTPOCHFL-OWOJBTEDSA-N	444972	C(=C/C(=O)O)\C(=O)O	0.013	1.2	444972	50	-0.416	Dicarboxylic Acids		1
1-(1-enyl-palmitoyl)-GPC (P-16:0)*	HTZINLFNXLXRBC-CQLBIITFSA-N	10917802	CCCCCCCCCCCCCC/C=C\OC[C@H](COP(=O)([O-])OCC[N+](C)(C)C)O	0.013	1.2	10917802	32	6	Lysophospholipids		1
1-oleoyl-GPC (18:1)	YAMUFBLWGFFICM-PTGWMXDISA-N	16081932	CCCCCCCC/C=C\CCCCCCCC(=O)OC[C@H](COP(=O)([O-])OCC[N+](C)(C)C)O	0.014	1.1	16081932	32	6.084	Unsaturated_Lysophosphatidylcholines		1
gamma-glutamylglutamate	OWQDWQKWSLFFFR-WDSKDSINSA-N	92865	C(CC(=O)N[C@@H](CCC(=O)O)C(=O)O)[C@@H](C(=O)O)N	0.016	0.85	92865	10	-4.176	Dipeptides		1
N1-methylinosine	WJNGQIYEQLPJMN-IOSLPCCCSA-N	65095	CN1C=NC2=C(C1=O)N=CN2[C@H]3[C@@H]([C@@H]([C@H](O3)CO)O)O	0.018	1.1	65095	19	-1.805	Purine Nucleosides		1
cys-gly, oxidized	KDJVKDYFFTWHBO-UHFFFAOYSA-N	333293	C(C(C(=O)NCC(=O)O)N)SSCC(C(=O)NCC(=O)O)N	0.02	1.3	333293	111	-4.968	Dipeptides		1
4-imidazoleacetate	PRJKNHOMHKJCEJ-UHFFFAOYSA-N	96215	C1=C(NC=N1)CC(=O)O	0.02	1.6	96215	112	-0.172	Imidazoles		1
glucose	WQZGKKKJIJFFOK-DVKNGEFBSA-N	79025	C([C@@H]1[C@H]([C@@H]([C@H]([C@H](O1)O)O)O)O)O	0.022	0.93	79025	48	-1.697	Hexoses		1
fructose	BJHIKXHVCXFQLS-UYFOZJQFSA-N	5984	C([C@H]([C@H]([C@@H](C(=O)CO)O)O)O)O	0.024	1.3	5984	7	-3.839	Hexoses		1
palmitoleoylcarnitine (C16:1)*	JFAGPSOZZSTLRF-KHPPLWFESA-N	71464547	CCCCCC/C=C\CCCCCCCC(=O)OC(CC(=O)[O-])C[N+](C)(C)C	0.025	1.1	71464547	30	6.133	NewCluster_30		1
sphingomyelin (d18:1/18:1, d18:2/18:0)	NBEADXWAAWCCDG-QDDWGVBQSA-N	6443882	CCCCCCCCCCCCC/C=C/[C@H]([C@H](COP(=O)([O-])OCC[N+](C)(C)C)NC(=O)CCCCCCC/C=C\CCCCCCCC)O	0.027	1	6443882	31	13.518	Sphingomyelins		1
3-hydroxy-3-methylglutarate	NPOAOTPXWNWTSH-UHFFFAOYSA-N	1662	CC(CC(=O)O)(CC(=O)O)O	0.028	0.92	1662	123	-0.965	Glutarates		1
phenylacetylglutamine	JFLIEFSWGNOPJJ-JTQLQIEISA-N	92258	C1=CC=C(C=C1)CC(=O)N[C@@H](CCC(=O)N)C(=O)O	0.029	0.94	92258	98	-0.302	Dipeptides		1
cysteinylglycine	ZUKPVRWZDMRIEO-VKHMYHEASA-N	439498	C([C@@H](C(=O)NCC(=O)O)N)S	0.029	1.3	439498	111	-3.403	Dipeptides		1
choline	OEYIOHPDSNJKLS-UHFFFAOYSA-N	305	C[N+](C)(C)CCO	0.029	1.1	305	85	-0.837	Ethanolamines		1
1-palmitoleoyl-GPC (16:1)*	LFUDDCMNKWEORN-ZXEGGCGDSA-N	24779461	CCCCCC/C=C\CCCCCCCC(=O)OC[C@H](COP(=O)([O-])OCC[N+](C)(C)C)O	0.029	1.1	24779461	32	4.946	Unsaturated_Lysophosphatidylcholines		1
myristoylcarnitine (C14)	PSHXNVGSVNEJBD-UHFFFAOYSA-N	6426854	CCCCCCCCCCCCCC(=O)OC(CC(=O)[O-])C[N+](C)(C)C	0.034	1.1	6426854	5	5.511	Saturated_Fatty Acids		1
lanthionine	DWPCPZJAHOETAG-IMJSIDKUSA-N	98504	C([C@@H](C(=O)O)N)SC[C@@H](C(=O)O)N	0.037	0.81	98504	99	-3.567	Sulfides		1
1-stearoyl-GPC (18:0)	IHNKQIMGVNPMTC-RUZDIDTESA-N	497299	CCCCCCCCCCCCCCCCCC(=O)OC[C@H](COP(=O)([O-])OCC[N+](C)(C)C)O	0.043	1.1	497299	49	6.6	Saturated_Lysophosphatidylcholines		1
citrulline	RHGKLRLOHDJJDR-BYPYZUCNSA-N	9750	C(C[C@@H](C(=O)O)N)CNC(=O)N	0.044	0.95	9750	114	-3.909	Amino Acids, Diamino		1
adenine	GFFGJBXGBJISGV-UHFFFAOYSA-N	190	C1=NC2=C(N1)C(=NC=N2)N	0.044	0.59	190	1	-1.287	Purines	b	1
1,2-dipalmitoyl-GPC (16:0/16:0)	KILNVBDSWZSGLL-KXQOOQHDSA-N	452110	CCCCCCCCCCCCCCCC(=O)OC[C@H](COP(=O)([O-])OCC[N+](C)(C)C)OC(=O)CCCCCCCCCCCCCCC	0.044	0.95	452110	89	13.852	Saturated_Phosphatidylcholines		1
2-hydroxyphenylacetate	CCVYRRGZDBSHFU-UHFFFAOYSA-N	11970	C1=CC=C(C(=C1)CC(=O)O)O	0.045	1.2	11970	67	0.328	Acids, Carbocyclic		1
isobutyrylcarnitine (C4)	LRCNOZRCYBNMEP-SECBINFHSA-N	168379	CC(C)C(=O)O[C@H](CC(=O)[O-])C[N+](C)(C)C	0.046	0.94	168379	51	-0.455	Carnitine		1
arachidate (20:0)	VKOBVWXKNCXXDE-UHFFFAOYSA-N	10467	CCCCCCCCCCCCCCCCCCCC(=O)O	0.048	1.2	10467	3	9.846	Saturated FA		1
1,2-dilinoleoyl-GPC (18:2/18:2)	FVXDQWZBHIXIEJ-LNDKUQBDSA-N	5288075	CCCCC/C=C\C/C=C\CCCCCCCC(=O)OC[C@H](COP(=O)([O-])OCC[N+](C)(C)C)OC(=O)CCCCCCC/C=C\C/C=C\CCCCC	0.048	1.1	5288075	6	14.442	Unsaturated_Phosphatidylcholines		1
homoarginine	QUOGESRFPZDMMT-YFKPBYRVSA-N	9085	C(CCN=C(N)N)C[C@@H](C(=O)O)N	0.049	0.92	9085	68	-3.227	Amino Acids, Basic		1
2-aminobutyrate	QWCKQJZIFLGMSD-GSVOUGTGSA-N	439691	CC[C@H](C(=O)O)N	0.05	0.97	439691	64	-2.466	Butyrates		1
glutamate	WHUUTDBJXJRKMK-UHFFFAOYSA-N	611	C(CC(=O)O)C(C(=O)O)N	0.051	1.1	611	42	-3.349	Glutamates		1
inosine	UGQMRVRMYYASKQ-KQYNXXCUSA-N	135398641	C1=NC2=C(C(=O)N1)N=CN2[C@H]3[C@@H]([C@@H]([C@H](O3)CO)O)O	0.052	2	135398641	19	-1.947	Purine Nucleosides		1
3-hydroxybutyrate (BHBA)	WHBMMWSBFZVSSR-UHFFFAOYSA-N	441	CC(CC(=O)O)O	0.054	0.93	441	69	-0.499	Butyrates		1
sphingosine 1-phosphate	DUYSYHSSBDVJSM-KRWOKUGFSA-N	5283560	CCCCCCCCCCCCC/C=C/[C@H]([C@H](COP(=O)(O)O)N)O	0.054	2	5283560	29	4.789	Lysophospholipids		1
N1-methyladenosine	GFYLSDSUCHVORB-IOSLPCCCSA-N	27476	CN1C=NC2=C(C1=N)N=CN2[C@H]3[C@@H]([C@@H]([C@H](O3)CO)O)O	0.054	0.92	27476	33	-0.596	Purine Nucleosides		1
sphinganine	OTKJDMGTUTTYMP-UHFFFAOYSA-N	3126	CCCCCCCCCCCCCCCC(C(CO)N)O	0.055	1.2	3126	29	6.268	Saturated_Ceramides		1
dimethylarginine (SDMA + ADMA)	YDGMGEXADBMOMJ-LURJTMIESA-N	123831	CN(C)C(=NCCC[C@@H](C(=O)O)N)N	0.057	0.84	123831	68	-2.559	Amino Acids, Basic		1
stearate (18:0)	QIQXTHQIDYTFRH-UHFFFAOYSA-N	5281	CCCCCCCCCCCCCCCCCC(=O)O	0.059	1.1	5281	3	8.708	Saturated FA		1
trimethylamine N-oxide	UYPYRKYUKCHHIB-UHFFFAOYSA-N	1145	C[N+](C)(C)[O-]	0.06	0.96	1145	132	-0.618	Methylamines		1
3-aminoisobutyrate	QCHPKSFMDHPSNR-UHFFFAOYSA-N	64956	CC(CN)C(=O)O	0.061	0.94	64956	116	-0.733	Amino Acids		1
gamma-glutamylmethionine	RQNSKRXMANOPQY-BQBZGAKWSA-N	7009567	CSCC[C@@H](C(=O)O)NC(=O)CC[C@@H](C(=O)O)N	0.063	1.1	7009567	117	-2.68	Dipeptides		1
10-heptadecenoate (17:1n7)	GDTXICBNEOEPAZ-FPLPWBNLSA-N	5312435	CCCCCC/C=C\CCCCCCCCC(=O)O	0.063	0.83	5312435	2	7.623	UnSaturated FA		1
cysteine s-sulfate	NOKPBJYHPHHWAN-REOHCLBHSA-N	115015	C([C@@H](C(=O)O)N)SS(=O)(=O)O	0.065	1.1	115015	74	-4.104	Amino Acids, Sulfur		1
glutarylcarnitine (C5-DC)	NXJAXUYOQLTISD-UHFFFAOYSA-N	71464488	C[N+](C)(C)CC(CC(=O)[O-])OC(=O)CCCC(=O)O	0.066	0.84	71464488	106	-1.273	Glutarates		1
pyruvate	LCTONWCANYUPML-UHFFFAOYSA-N	1060	CC(=O)C(=O)O	0.066	0.84	1060	71	-0.426	Pyruvates		1
N-acetylthreonine	PEDXUVCGOLSNLQ-WUJLRWPWSA-N	152204	C[C@H]([C@@H](C(=O)O)NC(=O)C)O	0.067	0.92	152204	110	-1.054	Dipeptides		1
docosapentaenoate (n3 DPA; 22:5n3)	AVKOENOBFIYBSA-WMPRHZDHSA-N	6441454	CCCCC/C=C\C/C=C\C/C=C\C/C=C\C/C=C\CCC(=O)O	0.07	0.84	6441454	102	9.16	UnSaturated FA		1
3-hydroxy-2-ethylpropionate	ZMZQVAUJTDKQGE-UHFFFAOYSA-N	188979	CCC(CO)C(=O)O	0.071	0.83	188979	69	-0.097	Valerates		1
1-linoleoylglycerol (18:2)	WECGLUPZRHILCT-HZJYTTRNSA-N	5283469	CCCCC/C=C\C/C=C\CCCCCCCC(=O)OCC(CO)O	0.074	1.8	5283469	27	6.805	Glycerides	f	1
N-acetyl-beta-alanine	LJLLAWRMBZNPMO-UHFFFAOYSA-N	76406	CC(=O)NCCC(=O)O	0.075	0.87	76406	22	-0.75	Glutamates		1
behenate (22:0)*	UKMSUNONTOPOIO-UHFFFAOYSA-N	8215	CCCCCCCCCCCCCCCCCCCCCC(=O)O	0.075	1.1	8215	3	10.984	Saturated FA		1
N-formylphenylalanine	NSTPXGARCQOSAU-VIFPVBQESA-N	759256	C1=CC=C(C=C1)C[C@@H](C(=O)O)NC=O	0.079	0.64	759256	58	0.631	Dipeptides		1
palmitoleate (16:1n7)	SECPZKHBENQXJG-FPLPWBNLSA-N	445638	CCCCCC/C=C\CCCCCCCC(=O)O	0.082	0.82	445638	2	7.054	UnSaturated FA		1
adenosine 3',5'-cyclic monophosphate (cAMP)	IVOMOUWHDPKRLL-KQYNXXCUSA-N	6076	C1[C@@H]2[C@H]([C@H]([C@@H](O2)N3C=NC4=C3N=CN=C4N)O)OP(=O)(O1)O	0.09	0.8	6076	33	-3.436	Adenine Nucleotides		1
3-methoxytyrosine	PFDUUKDQEHURQC-UHFFFAOYSA-N	1670	COC1=C(C=CC(=C1)CC(C(=O)O)N)O	0.094	0.94	1670	83	-2.471	Amino Acids, Aromatic		1
1-stearoyl-2-arachidonoyl-GPC (18:0/20:4)	PSVRFUPOQYJOOZ-QNPWAGBNSA-N	16219824	CCCCCCCCCCCCCCCCCC(=O)OC[C@H](COP(=O)([O-])OCC[N+](C)(C)C)OC(=O)CCC/C=C\C/C=C\C/C=C\C/C=C\CCCCC	0.097	0.99	16219824	6	15.769	Unsaturated_Phosphatidylcholines		1
N6,N6,N6-trimethyllysine	MXNRLFUSFKVQSK-QMMMGPOBSA-N	440120	C[N+](C)(C)CCCC[C@@H](C(=O)[O-])N	0.1	0.85	440120	41	-2.992	Amino Acids, Diamino		1
butyrylcarnitine (C4)	QWYFHHGCZUCMBN-UHFFFAOYSA-N	439829	CCCC(=O)OC(CC(=O)[O-])C[N+](C)(C)C	0.1	0.86	439829	13	-0.179	Carnitine		1
12,13-DiHOME	CQSLTKIXAJTQGA-FLIBITNWSA-N	10236635	CCCCCC(C(C/C=C\CCCCCCCC(=O)O)O)O	0.1	1.5	10236635	53	4.866	DiHOME		1
bilirubin (E,Z or Z,E)*	BPYKTIZUTYGOLE-VVCLLGATSA-N	5799469	CC1=C(NC(=C1CCC(=O)O)CC2=C(C(=C(N2)/C=C/3\C(=C(C(=O)N3)C)C=C)C)CCC(=O)O)/C=C\4/C(=C(C(=O)N4)C=C)C	0.11	1.2	5799469	26	2.167	Bile Pigments		1
2-hydroxystearate	KIHBGTRZFAVZRV-UHFFFAOYSA-N	69417	CCCCCCCCCCCCCCCCC(C(=O)O)O	0.11	1.2	69417	17	7.733	OH-FA_16_0_1		1
N-acetylleucine	WXNXCEHXYPACJF-ZETCQYMHSA-N	70912	CC(C)C[C@@H](C(=O)O)NC(=O)C	0.11	0.8	70912	35	1.053	Oligopeptides		1
homostachydrine*	XULZWQRXYTVUTE-ZETCQYMHSA-N	441447	C[N+]1(CCCC[C@H]1C(=O)[O-])C	0.11	0.95	441447	41	-0.26	Pipecolic Acids		1
linoleate (18:2n6)	OYHQOLUKZRVURQ-HZJYTTRNSA-N	5280450	CCCCC/C=C\C/C=C\CCCCCCCC(=O)O	0.11	0.91	5280450	2	7.865	UnSaturated FA		1
imidazole propionate	ZCKYOWGFRHAZIQ-UHFFFAOYSA-N	70630	C1=C(NC=N1)CCC(=O)O	0.12	0.91	70630	21	-0.432	Imidazoles		1
1-palmitoyl-GPE (16:0)	YVYMBNSKXOXSKW-HXUWFJFHSA-N	9547069	CCCCCCCCCCCCCCCC(=O)OC[C@H](COP(=O)(O)OCCN)O	0.12	1.1	9547069	94	5.024	Lysophospholipids		1
1-palmitoyl-2-oleoyl-GPC (16:0/18:1)	WTJKGGKOPKCXLL-MRCUWXFGSA-N	6436017	CCCCCCCCCCCCCCCC(=O)OCC(COP(=O)([O-])OCC[N+](C)(C)C)OC(=O)CCCCCCC/C=C\CCCCCCCC	0.12	0.97	6436017	6	14.474	Unsaturated_Phosphatidylcholines		1
xanthine	LRFVTYWOQMYALW-UHFFFAOYSA-N	1188	C1=NC2=C(N1)C(=O)NC(=O)N2	0.12	1.4	1188	1	-0.654	Xanthines	b	1
adenosine 5'-monophosphate (AMP)	UDMBCSSLTHHNCD-KQYNXXCUSA-N	6083	C1=NC2=C(C(=N1)N)N=CN2[C@H]3[C@@H]([C@@H]([C@H](O3)COP(=O)(O)O)O)O	0.13	1.3	6083	33	-4.025	Adenine Nucleotides		1
4-cholesten-3-one	NYOXRYYXRWJDKP-GYKMGIIDSA-N	91477	C[C@H](CCCC(C)C)[C@H]1CC[C@@H]2[C@@]1(CC[C@H]3[C@H]2CCC4=CC(=O)CC[C@]34C)C	0.13	1.1	91477	18	10.511	Cholestenes		1
2-hydroxyglutarate	HWXBTNAVRSUOJR-UHFFFAOYSA-N	43	C(CC(=O)O)C(C(=O)O)O	0.13	1.2	43	43	-1.116	Glutarates		1
4-hydroxy-2-oxoglutaric acid	WXSKVKPSMAHCSG-UHFFFAOYSA-N	599	C(C(C(=O)O)O)C(=O)C(=O)O	0.13	0.82	599	43	-1.82	Glutarates		1
sarcosine	FSYKKLYZXJSNPZ-UHFFFAOYSA-N	1088	CNCC(=O)O	0.13	0.93	1088	75	-0.794	N-substituted Glycines		1
salicylate	YGSDEFSMJLZEOE-UHFFFAOYSA-N	338	C1=CC=C(C(=C1)C(=O)O)O	0.13	0.94	338	107	0.908	Salicylates		1
2-palmitoyl-GPC (16:0)*	NEGQHKSYEYVFTD-HSZRJFAPSA-N	15061532	CCCCCCCCCCCCCCCC(=O)O[C@H](CO)COP(=O)([O-])OCC[N+](C)(C)C	0.13	1.1	15061532	49	5.462	Saturated_Lysophosphatidylcholines		1
isoleucine	AGPKZVBTJJNPAG-WHFBIAKZSA-N	6306	CC[C@H](C)[C@@H](C(=O)O)N	0.14	0.97	6306	100	-1.6	Amino Acids, Branched-Chain		1
proline	ONIBWKKTOPOVIA-BYPYZUCNSA-N	145742	C1C[C@H](NC1)C(=O)O	0.14	1	145742	44	-0.185	Imino Acids		1
pipecolate	HXEACLLIILLPRG-UHFFFAOYSA-N	849	C1CCNC(C1)C(=O)O	0.14	0.98	849	41	0.173	Pipecolic Acids		1
pyridoxate	HXACOUQIXZGNBF-UHFFFAOYSA-N	6723	CC1=NC=C(C(=C1O)C(=O)O)CO	0.14	1.2	6723	57	-0.835	Pyridines		1
trans-urocanate	LOIYMIARKYCTBW-OWOJBTEDSA-N	736715	C1=C(NC=N1)/C=C/C(=O)O	0.15	0.87	736715	21	-0.138	Acrylates		1
palmitoylcholine	ODYPFMHOOQOHEF-UHFFFAOYSA-N	151731	CCCCCCCCCCCCCCCC(=O)OCC[N+](C)(C)C	0.15	1.5	151731	5	7.553	Carnitine		1
laurate (12:0)	POULHZVOKOAJMA-UHFFFAOYSA-N	3893	CCCCCCCCCCCC(=O)O	0.15	1.1	3893	3	5.294	Saturated FA		1
eicosenoate (20:1)	BITHHVVYSMSWAG-KTKRTIGZSA-N	5282768	CCCCCCCC/C=C\CCCCCCCCCC(=O)O	0.15	1.2	5282768	2	9.33	UnSaturated FA		1
gentisate	WXTMDXOMEHJXQO-UHFFFAOYSA-N	3469	C1=CC(=C(C=C1O)C(=O)O)O	0.16	1.1	3469	107	0.616	Gentisates		1
1-palmitoylglycerol (16:0)	QHZLMUACJMDIAE-UHFFFAOYSA-N	14900	CCCCCCCCCCCCCCCC(=O)OCC(CO)O	0.16	1.6	14900	17	6.51	Glycerides		1
caprylate (8:0)	WWZKQHOCKIZLMA-UHFFFAOYSA-N	379	CCCCCCCC(=O)O	0.16	1	379	3	3.018	Saturated FA		1
13-methylmyristate	ZOCYQVNGROEVLU-UHFFFAOYSA-N	151014	CC(C)CCCCCCCCCCCC(=O)O	0.16	0.83	151014	16	6.94	Saturated FA		1
methionine	FFEARJCKVFRZRR-BYPYZUCNSA-N	6137	CSCC[C@@H](C(=O)O)N	0.17	0.98	6137	101	-1.853	Amino Acids, Sulfur		1
indole-3-carboxylic acid	KMAKOBLIOCQGJP-UHFFFAOYSA-N	69867	C1=CC=C2C(=C1)C(=CN2)C(=O)O	0.17	1.1	69867	40	1.385	Indoles		1
2-hydroxydecanoate	GHPVDCPCKSNJDR-UHFFFAOYSA-N	21488	CCCCCCCCC(C(=O)O)O	0.17	0.95	21488	17	3.181	OH-FA_8_0_1		1
1-oleoylglycerol (18:1)	RZRNAYUHWVFMIP-KTKRTIGZSA-N	5283468	CCCCCCCC/C=C\CCCCCCCC(=O)OCC(CO)O	0.17	1.4	5283468	27	7.132	Oleic Acids	f	1
homocitrulline	XIGSAGMEBXLVJJ-YFKPBYRVSA-N	65072	C(CCNC(=O)N)C[C@@H](C(=O)O)N	0.18	0.82	65072	114	-3.551	Amino Acids, Diamino		1
octanoylcarnitine (C8)	CXTATJFJDMJMIY-UHFFFAOYSA-N	123701	CCCCCCCC(=O)OC(CC(=O)[O-])C[N+](C)(C)C	0.18	1	123701	5	2.097	Carnitine		1
pentadecanoate (15:0)	WQEPLUUGTLDZJY-UHFFFAOYSA-N	13849	CCCCCCCCCCCCCCC(=O)O	0.18	0.92	13849	3	7.001	Saturated FA		1
sphingomyelin (d18:1/14:0, d16:1/16:0)*	KYICBZWZQPCUMO-PSALXKTOSA-N	11433862	CCCCCCCCCCCCC/C=C/[C@H]([C@H](COP(=O)([O-])OCC[N+](C)(C)C)NC(=O)CCCCCCCCCCCCC)O	0.18	0.96	11433862	31	11.758	Sphingomyelins		1
1-palmitoyl-2-arachidonoyl-GPC (16:0/20:4n6)	IIZPXYDJLKNOIY-JXPKJXOSSA-N	10747814	CCCCCCCCCCCCCCCC(=O)OC[C@H](COP(=O)([O-])OCC[N+](C)(C)C)OC(=O)CCC/C=C\C/C=C\C/C=C\C/C=C\CCCCC	0.18	0.97	10747814	6	14.631	Unsaturated_Phosphatidylcholines		1
5-acetylamino-6-formylamino-3-methyluracil	RDZNZFGKEVDNPK-UHFFFAOYSA-N	108214	CC(=O)NC1=C(NC(=O)N(C1=O)C)NC=O	0.18	0.74	108214	1	-0.786	Xanthenes	b	1
3-(3-hydroxyphenyl)propionate	QVWAEZJXDYOKEH-UHFFFAOYSA-N	91	C1=CC(=CC(=C1)O)CCC(=O)O	0.19	1.1	91	67	0.497	Acids, Carbocyclic		1
cystathionine	ILRYLPWNYFXEMH-WHFBIAKZSA-N	439258	C(CSC[C@@H](C(=O)O)N)[C@@H](C(=O)O)N	0.19	0.87	439258	99	-3.209	Amino Acids, Sulfur		1
3beta-hydroxy-5-cholestenoate	WVXOMPRLWLXFAP-AMQKJUDNSA-N	165511	C[C@H](CCCC(C)C(=O)O)[C@H]1CC[C@@H]2[C@@]1(CC[C@H]3[C@H]2CC=C4[C@@]3(CC[C@@H](C4)O)C)C	0.19	0.9	165511	59	8.429	Androstenols		1
1-arachidonylglycerol (20:4)	DCPCOKIYJYGMDN-DOFZRALJSA-N	5282281	CCCCC/C=C\C/C=C\C/C=C\C/C=C\CCCC(=O)OCC(CO)O	0.19	1.9	5282281	27	7.289	Glycerides	f	1
N1-Methyl-2-pyridone-5-carboxamide	JLQSXXWTCJPCBC-UHFFFAOYSA-N	69698	CN1C=C(C=CC1=O)C(=O)N	0.19	0.97	69698	12	-1.166	Pyridines		1
N1-Methyl-4-pyridone-3-carboxamide	KTLRWTOPTKGYQY-UHFFFAOYSA-N	440810	CN1C=CC(=O)C(=C1)C(=O)N	0.19	0.78	440810	12	-0.029	Pyridines		1
palmitoyl dihydrosphingomyelin (d18:0/16:0)*	QHZIGNLCLJPLCU-QPPIDDCLSA-N	9939965	CCCCCCCCCCCCCCC[C@H]([C@H](COP(=O)([O-])OCC[N+](C)(C)C)NC(=O)CCCCCCCCCCCCCCC)O	0.19	1	9939965	28	13.146	Saturated_Ceramides		1
linolenate [alpha or gamma; (18:3n3 or 6)]	DTOSIQBPPRVQHS-PDBXOOCHSA-N	5280934	CC/C=C\C/C=C\C/C=C\CCCCCCCC(=O)O	0.19	0.99	5280934	2	7.538	UnSaturated FA		1
caffeine	RYYVLZVUVIJVGH-UHFFFAOYSA-N	2519	CN1C=NC2=C1C(=O)N(C(=O)N2C)C	0.19	0.98	2519	1	-0.495	Xanthines	b	1
N-delta-acetylornithine	SRXKAYJJGAAOBP-UHFFFAOYSA-N	9920500	CC(=O)NCCCC(C(=O)O)N	0.2	1	9920500	77	-3.031	Amino Acids, Diamino		1
biliverdin	RCNSAJSGRJSBKK-YKSNQIBWSA-N	5353439	CC\1=C(/C(=C/C2=C(C(=C(N2)/C=C\3/C(=C(C(=O)N3)C)C=C)C)CCC(=O)O)/N/C1=C/C4=NC(=O)C(=C4C)C=C)CCC(=O)O	0.2	0.92	5353439	26	2.708	Bile Pigments		1
tartronate (hydroxymalonate)	ROBFUDYVXSDBQM-UHFFFAOYSA-N	45	C(C(=O)O)(C(=O)O)O	0.2	0.91	45	55	-1.29	Dicarboxylic Acids		1
dodecanedioate	TVIDDXQYHWJXFK-UHFFFAOYSA-N	12736	C(CCCCCC(=O)O)CCCCC(=O)O	0.2	0.81	12736	9	3.42	O=FA_12_1		1
gamma-carboxyglutamate	UHBYWPGGCSDKFX-UHFFFAOYSA-N	40772	C(C(C(=O)O)C(=O)O)C(C(=O)O)N	0.2	0.92	40772	42	-3.607	Tricarboxylic Acids		1
carnitine	PHIQHXFUZVPYII-ZCFIWIBFSA-N	10917	C[N+](C)(C)C[C@@H](CC(=O)[O-])O	0.2	0.98	10917	13	-1.741	Trimethyl Ammonium Compounds		1
hexanoylcarnitine (C6)	VVPRQWTYSNDTEA-UHFFFAOYSA-N	6426853	CCCCCC(=O)OC(CC(=O)[O-])C[N+](C)(C)C	0.21	1	6426853	103	0.959	Carnitine		1
cysteine-glutathione disulfide	BNRXZEPOHPEEAS-UHFFFAOYSA-N	4247235	C(CC(=O)NC(CSSCC(C(=O)O)N)C(=O)NCC(=O)O)C(C(=O)O)N	0.21	1.2	4247235	117	-4.967	Dipeptides		1
alpha-tocopherol	GVJHHUAWPYXKBD-IEOSBIPESA-N	14985	CC1=C(C(=C2CC[C@@](OC2=C1C)(C)CCC[C@H](C)CCC[C@H](C)CCCC(C)C)C)O	0.21	0.98	14985	79	10.695	Tocopherols		1
N-methylproline	CWLQUGTUXBXTLF-UHFFFAOYSA-N	557	CN1CCCC1C(=O)O	0.22	1	557	60	0.054	Imino Acids		1
4-methyl-2-oxopentanoate	BKAJNAXTPSGJCU-UHFFFAOYSA-N	70	CC(C)CC(=O)C(=O)O	0.22	0.92	70	104	0.904	Keto Acids		1
9-hydroxystearate	RKHXDCVAPIMDMG-UHFFFAOYSA-N	9570127	CCCCCCCCCC(CCCCCCCC(=O)O)O	0.22	0.99	9570127	15	6.623	OH-FA_16_0_1		1
13-HODE + 9-HODE	XBGUTAISSLTGIB-UHFFFAOYSA-N	43013	CC1C(=NOC(=O)NC)SCS1	0.23	1.2	43013	20	1.152			1
retinol (Vitamin A)	FPIPGXGPPPQFEQ-OVSJKPMPSA-N	445354	CC1=C(C(CCC1)(C)C)/C=C/C(=C/C=C/C(=C/CO)/C)/C	0.23	0.97	445354	129	6.158	Retinoids		1
N-stearoyl-sphinganine (d18:0/18:0)*	KZTJQXAANJHSCE-OIDHKYIRSA-N	5283573	CCCCCCCCCCCCCCCCCC(=O)N[C@@H](CO)[C@@H](CCCCCCCCCCCCCCC)O	0.23	0.93	5283573	28	15.332	Saturated_Ceramides		1
palmitic amide	HSEMFIZWXHQJAE-UHFFFAOYSA-N	69421	CCCCCCCCCCCCCCCC(=O)N	0.23	1.2	69421	87	6.842	Saturated_Fatty Acids		1
docosadienoate (22:2n6)	HVGRZDASOHMCSK-AVQMFFATSA-N	5282807	CCCCC/C=C/C/C=C/CCCCCCCCCCCC(=O)O	0.23	1.1	5282807	2	10.141	UnSaturated FA		1
cystine	LEVWYRKDKASIDU-IMJSIDKUSA-N	67678	C([C@@H](C(=O)O)N)SSC[C@@H](C(=O)O)N	0.24	0.79	67678	74	-3.312	Amino Acids, Sulfur		1
alpha-ketoglutarate	KPGXRSRHYNQIFN-UHFFFAOYSA-N	51	C(CC(=O)O)C(=O)C(=O)O	0.24	0.95	51	122	-1.056	Glutarates		1
3-hydroxydecanoate	FYSSBMZUBSBFJL-UHFFFAOYSA-N	26612	CCCCCCCC(CC(=O)O)O	0.24	1	26612	15	2.704	OH-FA_8_0_1		1
phenylpyruvate	BTNMPGBKDVTSJY-UHFFFAOYSA-N	997	C1=CC=C(C=C1)CC(=O)C(=O)O	0.24	0.87	997	62	0.907	Pyruvates		1
margarate (17:0)	KEMQGTRYUADPNZ-UHFFFAOYSA-N	10465	CCCCCCCCCCCCCCCCC(=O)O	0.24	1	10465	3	8.139	Saturated FA		1
beta-hydroxyisovalerate	AXFYFNCPONWUHW-UHFFFAOYSA-N	69362	CC(C)(CC(=O)O)O	0.24	0.85	69362	125	-0.082	Valerates	a	1
7-methylxanthine	PFWLFWPASULGAN-UHFFFAOYSA-N	68374	CN1C=NC2=C1C(=O)NC(=O)N2	0.24	0.97	68374	1	-0.779	Xanthines	b	1
5-methylthioadenosine (MTA)	WUUGFSXJNOTRMR-IOSLPCCCSA-N	439176	CSC[C@@H]1[C@H]([C@H]([C@@H](O1)N2C=NC3=C2N=CN=C3N)O)O	0.25	0.88	439176	33	-1.051	Purine Nucleosides		1
1-linoleoyl-GPC (18:2)	SPJFYYJXNPEZDW-UTJQPWESSA-N	11988421	CCCCC/C=C\C/C=C\CCCCCCCC(=O)OCC(COP(=O)([O-])OCC[N+](C)(C)C)O	0.25	1	11988421	32	5.757	Unsaturated_Lysophosphatidylcholines		1
asparagine	DCXYFEDJOCDNAF-REOHCLBHSA-N	6267	C([C@@H](C(=O)O)N)C(=O)N	0.26	1	6267	84	-4.435	Amino Acids, Basic		1
leucine	ROHFNLRQFUQHCH-YFKPBYRVSA-N	6106	CC(C)C[C@@H](C(=O)O)N	0.26	0.97	6106	100	-1.389	Amino Acids, Branched-Chain		1
phenyllactate (PLA)	VOXXWSYKYCBWHO-UHFFFAOYSA-N	3848	C1=CC=C(C=C1)CC(C(=O)O)O	0.26	1	3848	62	0.658	Pyruvates		1
theophylline	ZFXYFBGIUFBOJW-UHFFFAOYSA-N	2153	CN1C2=C(C(=O)N(C1=O)C)NC=N2	0.26	1	2153	1	-0.37	Xanthines	b	1
4-acetamidobutanoate	UZTFMUBKZQVKLK-UHFFFAOYSA-N	18189	CC(=O)NCCCC(=O)O	0.27	1	18189	22	-0.392	Glutamates		1
N2,N2-dimethylguanosine	RSPURTUNRHNVGF-IOSLPCCCSA-N	135501639	CN(C)C1=NC2=C(C(=O)N1)N=CN2[C@H]3[C@@H]([C@@H]([C@H](O3)CO)O)O	0.27	0.96	135501639	19	-1.246	Purine Nucleosides		1
docosahexaenoate (DHA; 22:6n3)	MBMBGCFOFBJSGT-KUBAVDMBSA-N	445580	CC/C=C\C/C=C\C/C=C\C/C=C\C/C=C\C/C=C\CCC(=O)O	0.27	0.92	445580	102	8.833	UnSaturated FA		1
theobromine	YAPQBXQYLJRXSA-UHFFFAOYSA-N	5429	CN1C=NC2=C1C(=O)NC(=O)N2C	0.27	0.95	5429	1	-0.637	Xanthines	b	1
phosphate	NBIIXXVUZAFLBC-UHFFFAOYSA-K	1061	[O-]P(=O)([O-])[O-]	0.28	0.85	1061	86	-2.247			1
N-acetylaspartate (NAA)	OTCCIMWXFLJLIA-BYPYZUCNSA-N	65065	CC(=O)N[C@@H](CC(=O)O)C(=O)O	0.28	0.89	65065	73	-1.265	Dipeptides		1
1-palmitoyl-2-docosahexaenoyl-GPE (16:0/22:6)*	MPWUZHVZZKSTPV-MADBQMNMSA-N	9546799	CCCCCCCCCCCCCCCC(=O)OC[C@H](COP(=O)(O)OCCN)OC(=O)CC/C=C\C/C=C\C/C=C\C/C=C\C/C=C\C/C=C\CC	0.28	1.2	9546799	4	14.677	Phosphatidylethanolamines		1
arachidonate (20:4n6)	YZXBAPSDXZZRGB-DOFZRALJSA-N	444899	CCCCC/C=C\C/C=C\C/C=C\C/C=C\CCCC(=O)O	0.28	0.95	444899	36	8.349	UnSaturated FA		1
phenylalanine	COLNVLDHVKWLRT-QMMMGPOBSA-N	6140	C1=CC=C(C=C1)C[C@@H](C(=O)O)N	0.29	0.98	6140	58	-1.575	Amino Acids, Aromatic		1
3-hydroxyisobutyrate	DBXBTMSZEOQQDU-UHFFFAOYSA-N	87	CC(CO)C(=O)O	0.29	0.95	87	69	-0.666	Butyrates		1
cholesterol	HVYWMOMLDIMFJA-FNOPAARDSA-N	11025495	C[C@H](CCCC(C)C)[C@H]1CC[C@@H]2[C@@]1(CC[C@H]3[C@H]2CC=C4[C@@]3(CCC(C4)O)C)C	0.29	0.96	11025495	76	10.518	Cholestenes		1
gamma-glutamylhistidine	PXVCMZCJAUJLJP-YUMQZZPRSA-N	7017195	C1=C(NC=N1)C[C@@H](C(=O)O)NC(=O)CC[C@@H](C(=O)O)N	0.29	1.2	7017195	54	-4.256	Dipeptides		1
imidazole lactate	ACZFBYCNAVEFLC-YFKPBYRVSA-N	440129	C1=C(NC=N1)C[C@@H](C(=O)O)O	0.29	0.98	440129	21	-0.767	Imidazoles		1
myristoleate (14:1n5)	YWWVWXASSLXJHU-WAYWQWQTSA-N	5281119	CCCC/C=C\CCCCCCCC(=O)O	0.29	0.95	5281119	2	5.916	UnSaturated FA		1
N-palmitoyl-sphingosine (d18:1/16:0)	YDNKGFDKKRUKPY-TURZORIXSA-N	5283564	CCCCCCCCCCCCCCCC(=O)N[C@@H](CO)[C@@H](/C=C/CCCCCCCCCCCCC)O	0.29	1.1	5283564	93	13.944	Unsaturated_Ceramides		1
glutamine	ZDXPYRJPNDTMRX-VKHMYHEASA-N	5961	C(CC(=O)N)[C@@H](C(=O)O)N	0.3	0.98	5961	113	-4.077	Amino Acids, Basic		1
gamma-glutamylalanine	WQXXXVRAFAKQJM-WHFBIAKZSA-N	440103	C[C@@H](C(=O)O)NC(=O)CC[C@@H](C(=O)O)N	0.3	1.2	440103	10	-3.651	Dipeptides		1
creatinine	DDRJAANPRJIHGJ-UHFFFAOYSA-N	588	CN1CC(=O)N=C1N	0.31	0.98	588	20	-0.126	Imidazoles		1
1-linoleoyl-GPE (18:2)*	DBHKHNGBVGWQJE-USWSLJGRSA-N	52925130	CCCCC/C=C\C/C=C\CCCCCCCC(=O)OC[C@H](COP(=O)(O)OCCN)O	0.31	1.1	52925130	52	5.319	Phosphatidylethanolamines		1
nonadecanoate (19:0)	ISYWECDDZWTKFF-UHFFFAOYSA-N	12591	CCCCCCCCCCCCCCCCCCC(=O)O	0.31	1.1	12591	3	9.277	Saturated FA		1
taurolithocholate 3-sulfate	HSNPMXROZIQAQD-GBURMNQMSA-N	440071	C[C@H](CCC(=O)NCCS(=O)(=O)O)[C@H]1CC[C@@H]2[C@@]1(CC[C@H]3[C@H]2CC[C@H]4[C@@]3(CC[C@H](C4)OS(=O)(=O)O)C)C	0.31	1	440071	24	5.644	Taurocholic Acid		1
urate	LEHOTFFKMJEONL-UHFFFAOYSA-N	1175	C12=C(NC(=O)N1)NC(=O)NC2=O	0.31	0.96	1175	1	-1.191	Xanthines	b	1
histidine	HNDVDQJCIGZPNO-YFKPBYRVSA-N	6274	C1=C(NC=N1)C[C@@H](C(=O)O)N	0.32	0.96	6274	21	-3.429	Amino Acids, Cyclic		1
citrate	KRKNYBCHXYNGOX-UHFFFAOYSA-N	311	C(C(=O)O)C(CC(=O)O)(C(=O)O)O	0.32	0.93	311	123	-2.247	Citrates		1
gamma-glutamyl-epsilon-lysine	JPKNLFVGUZRHOB-YUMQZZPRSA-N	7015685	C(CCNC(=O)CC[C@@H](C(=O)O)N)C[C@@H](C(=O)O)N	0.32	1.2	7015685	96	-3.776	Dipeptides		1
ergothioneine	SSISHJJTAXXQAX-UHFFFAOYSA-N	3032311	C[N+](C)(C)C(CC1=CNC(=S)N1)C(=O)[O-]	0.32	1	3032311	21	-0.319	Histidine		1
3-indoxyl sulfate	BXFFHSIDQOFMLE-UHFFFAOYSA-N	10258	C1=CC=C2C(=C1)C(=CN2)OS(=O)(=O)O	0.32	0.92	10258	121	-0.075	Indoles		1
10-nonadecenoate (19:1n9)	BBOWBNGUEWHNQZ-KTKRTIGZSA-N	5312513	CCCCCCCC/C=C\CCCCCCCCC(=O)O	0.32	1.1	5312513	2	8.761	UnSaturated FA		1
N-acetyl-aspartyl-glutamate (NAAG)	OPVPGKGADVGKTG-UHFFFAOYSA-N	5255	CC(=O)NC(CC(=O)O)C(=O)NC(CCC(=O)O)C(=O)O	0.33	1.2	5255	78	-2.092	Dipeptides		1
N-acetylglycine	OKJIRPAQVSHGFK-UHFFFAOYSA-N	10972	CC(=O)NCC(=O)O	0.33	1.1	10972	73	-0.908	Dipeptides		1
phytanate	RLCKHJSFHOZMDR-UHFFFAOYSA-N	26840	CC(C)CCCC(C)CCCC(C)CCCC(C)CC(=O)O	0.33	1.1	26840	16	9.602	Saturated FA		1
glycerate	RBNPOMFGQQGHHO-UHFFFAOYSA-N	752	C(C(C(=O)O)O)O	0.33	1	752	55	-1.723	Sugar Acids		1
erucate (22:1n9)	DPUOLQHDNGRHBS-KTKRTIGZSA-N	5281116	CCCCCCCC/C=C\CCCCCCCCCCCC(=O)O	0.33	1.1	5281116	2	10.468	UnSaturated FA		1
1-stearoyl-GPE (18:0)	BBYWOYAFBUOUFP-JOCHJYFZSA-N	9547068	CCCCCCCCCCCCCCCCCC(=O)OC[C@H](COP(=O)(O)OCCN)O	0.34	1.2	9547068	94	6.162	Lysophospholipids		1
myristate (14:0)	TUNFSRHWOTWDNC-UHFFFAOYSA-N	11005	CCCCCCCCCCCCCC(=O)O	0.34	0.96	11005	3	6.432	Saturated FA		1
serine	MTCFGRXMJLQNBG-REOHCLBHSA-N	5951	C([C@@H](C(=O)O)N)O	0.35	1	5951	119	-3.956	Amino Acids		1
argininate*	BMFMQGXDDJALKQ-BYPYZUCNSA-N	160437	C(C[C@@H](C(=O)O)O)CN=C(N)N	0.35	0.95	160437	80	-1.352	Guanidines		1
oleamide	FATBGEAMYMYZAF-KTKRTIGZSA-N	5283387	CCCCCCCC/C=C\CCCCCCCC(=O)N	0.35	1.2	5283387	91	7.464	Oleic Acids	g	1
glycerol	PEDCQBHIVMGVHV-UHFFFAOYSA-N	753	C(C(CO)O)O	0.35	0.93	753	81	-1.88	Sugar Alcohols		1
stearoyl sphingomyelin (d18:1/18:0)	LKQLRGMMMAHREN-YJFXYUILSA-N	6453725	CCCCCCCCCCCCCCCCCC(=O)N[C@@H](COP(=O)([O-])OCC[N+](C)(C)C)[C@@H](/C=C/CCCCCCCCCCCCC)O	0.35	0.97	6453725	31	14.034	Unsaturated_Phosphatidylcholines		1
3-methylxanthine	GMSNIKWWOQHZGF-UHFFFAOYSA-N	70639	CN1C2=C(C(=O)NC1=O)NC=N2	0.35	0.96	70639	1	-0.512	Xanthines	b	1
lysine	KDXKERNSBIXSRK-YFKPBYRVSA-N	5962	C(CCN)C[C@@H](C(=O)O)N	0.36	0.98	5962	37	-2.949	Amino Acids, Basic		1
iminodiacetate (IDA)	NBZBKCUXIYYUSX-UHFFFAOYSA-N	8897	C(C(=O)O)NCC(=O)O	0.36	0.91	8897	75	-1.412	Imino Acids		1
indoleacetate	SEOVTRFCIGRIMH-UHFFFAOYSA-N	802	C1=CC=C2C(=C1)C(=CN2)CC(=O)O	0.36	1	802	40	0.805	Indoles		1
S-methylcysteine sulfoxide	ZZLHPCSGGOGHFW-UHFFFAOYSA-N	82142	CS(=O)CC(C(=O)O)N	0.36	1.1	82142	56	-4.24	Methionine		1
quinate	AAWZDTNXLSGCEK-LNVDRNJUSA-N	6508	C1[C@H](C([C@@H](CC1(C(=O)O)O)O)O)O	0.37	1.1	6508	7	-1.979	Acids, Carbocyclic		1
methylmalonate (MMA)	ZIYVHBGGAOATLY-UHFFFAOYSA-N	487	CC(C(=O)O)C(=O)O	0.37	0.91	487	70	-0.085	Malonates		1
galactitol (dulcitol)	FBPFZTCFMRRESA-GUCUJZIJSA-N	11850	C([C@H]([C@@H]([C@@H]([C@H](CO)O)O)O)O)O	0.37	1	11850	23	-3.896	Sugar Alcohols		1
betaine	KWIUHFFTVRNATP-UHFFFAOYSA-N	247	C[N+](C)(C)CC(=O)[O-]	0.37	0.98	247	39	-1.227	Trimethyl Ammonium Compounds		1
orotate	PXQPEWDEAKTCGB-UHFFFAOYSA-N	967	C1=C(NC(=O)NC1=O)C(=O)O	0.37	1.1	967	124	-1.247	Uracil		1
valine	KZSNJWFQEVHDMF-BYPYZUCNSA-N	6287	CC(C)[C@@H](C(=O)O)N	0.38	0.99	6287	64	-2.169	Amino Acids, Branched-Chain		1
perfluorooctanesulfonic acid (PFOS)	YFSUTJLHUFNCNZ-UHFFFAOYSA-N	74483	C(C(C(C(C(F)(F)S(=O)(=O)O)(F)F)(F)F)(F)F)(C(C(C(F)(F)F)(F)F)(F)F)(F)F	0.38	1.1	74483	86	6.332	Fluorocarbons		1
methionine sulfone	UCUNFLYVYCGDHP-UHFFFAOYSA-N	69961	CS(=O)(=O)CCC(C(=O)O)N	0.38	0.97	69961	56	-3.074	Methionine		1
pyridoxal	RADKZDMFGJYCBB-UHFFFAOYSA-N	1050	CC1=NC=C(C(=C1O)C=O)CO	0.38	0.98	1050	57	-0.754	Pyridines		1
N-palmitoylglycine	KVTFEOAKFFQCCX-UHFFFAOYSA-N	151008	CCCCCCCCCCCCCCCC(=O)NCC(=O)O	0.38	1.1	151008	47	6.742	Saturated_Fatty Acids	c	1
eicosapentaenoate (EPA; 20:5n3)	JAZBEHYOTPTENJ-JLNKQSITSA-N	446284	CC/C=C\C/C=C\C/C=C\C/C=C\C/C=C\CCCC(=O)O	0.38	1	446284	36	8.022	UnSaturated FA		1
guanidinoacetate	BPMFZUMJYQTVII-UHFFFAOYSA-N	763	C(C(=O)O)N=C(N)N	0.39	0.96	763	82	-3.974			1
deoxycarnitine	JHPNVNIEXXLNTR-UHFFFAOYSA-O	134	C[N+](C)(C)CCCC(=O)O	0.39	0.99	134	22	-0.23	Carnitine		1
pyroglutamine*	NPWMTBZSRRLQNJ-UHFFFAOYSA-N	134508	C1CC(=O)NC(=O)C1N	0.39	0.96	134508	130	-1.014	Dipeptides		1
3-methylglutarylcarnitine (2)	HFCPFJNSBPQJDP-UHFFFAOYSA-N	128145	CC(CC(=O)[O-])CC(=O)OC(CC(=O)O)C[N+](C)(C)C	0.39	0.97	128145	106	-0.765	Glutarates		1
thioproline	DZLNHFMRPBPULJ-VKHMYHEASA-N	93176	C1[C@H](NCS1)C(=O)O	0.39	0.95	93176	63	-0.288	Thiazoles		1
N-stearoyl-sphingosine (d18:1/18:0)*	VODZWWMEJITOND-NXCSZAMKSA-N	5283565	CCCCCCCCCCCCCCCCCC(=O)N[C@@H](CO)[C@@H](/C=C/CCCCCCCCCCCCC)O	0.39	1	5283565	93	15.082	Unsaturated_Ceramides		1
2-oxoarginine*	ARBHXJXXVVHMET-UHFFFAOYSA-N	558	C(CC(=O)C(=O)O)CN=C(N)N	0.4	0.92	558	80	-1.292	Guanidines		1
quinolinate	GJAWHXHKYYXBSV-UHFFFAOYSA-N	1066	C1=CC(=C(N=C1)C(=O)O)C(=O)O	0.4	0.94	1066	12	-0.569	Pyridines		1
2-aminoadipate	OYIFNHCXNCRBQI-UHFFFAOYSA-N	469	C(CC(C(=O)O)N)CC(=O)O	0.41	1	469	37	-2.991	Dicarboxylic Acids		1
tryptophan betaine	AOHCBEAZXHZMOR-ZDUSSCGKSA-N	442106	C[N+](C)(C)[C@@H](CC1=CNC2=CC=CC=C21)C(=O)[O-]	0.41	0.93	442106	11	0.1	Indoles		1
taurochenodeoxycholate	BHTRKEVKTKCXOH-BJLOMENOSA-N	387316	C[C@H](CCC(=O)NCCS(=O)(=O)O)[C@H]1CC[C@@H]2[C@@]1(CC[C@H]3[C@H]2[C@@H](C[C@H]4[C@@]3(CC[C@H](C4)O)C)O)C	0.41	1.1	387316	24	4.856	Taurocholic Acid		1
alpha-hydroxyisovalerate	NGEWQZIDQIYUNV-UHFFFAOYSA-N	99823	CC(C)C(C(=O)O)O	0.41	1.1	99823	38	0.064	Valerates		1
thyroxine	XUIIKFGFIJCVMT-LBPRGKRZSA-N	5819	C1=C(C=C(C(=C1I)OC2=CC(=C(C(=C2)I)O)I)I)C[C@@H](C(=O)O)N	0.42	0.98	5819	83	2.306	Amino Acids, Aromatic		1
1-oleoyl-GPE (18:1)	PYVRVRFVLRNJLY-MZMPXXGTSA-N	9547071	CCCCCCCC/C=C\CCCCCCCC(=O)OC[C@H](COP(=O)(O)OCCN)O	0.42	1	9547071	52	5.646	Phosphatidylethanolamines		1
N-methylpipecolate	BPSLZWSRHTULGU-ZCFIWIBFSA-N	11286529	CN1CCCC[C@@H]1C(=O)O	0.42	0.95	11286529	41	0.412	Pipecolic Acids		1
nicotinamide	DFPAKSUCGFBDDF-UHFFFAOYSA-N	936	C1=CC(=CN=C1)C(=O)N	0.43	0.88	936	12	-1.236	Pyridines		1
succinimide	KZNICNPSHKQLFF-UHFFFAOYSA-N	11439	C1CC(=O)NC1=O	0.43	0.95	11439	46	-0.97	Pyrrolidinones		1
pantothenate	GHOKWGTUZJEAQD-ZETCQYMHSA-N	6613	CC(C)(CO)[C@H](C(=O)NCCC(=O)O)O	0.44	0.94	6613	22	-1.343	beta-Alanine		1
isovalerylcarnitine (C5)	IGQBPDJNUXPEMT-UHFFFAOYSA-N	6426851	CC(C)CC(=O)OC(CC(=O)[O-])C[N+](C)(C)C	0.44	0.94	6426851	51	0.329	Carnitine		1
oxalate (ethanedioate)	MUBZPKHOEPUJKR-UHFFFAOYSA-N	971	C(=O)(C(=O)O)O	0.44	1.1	971	55	-0.688	Dicarboxylic Acids		1
succinate	KDYFGRWQOYBRFD-UHFFFAOYSA-N	1110	C(CC(=O)O)C(=O)O	0.44	1	1110	118	-0.71	Dicarboxylic Acids		1
phosphoethanolamine	SUHOOTKUPISOBE-UHFFFAOYSA-N	1015	C(COP(=O)(O)O)N	0.44	0.81	1015	85	-2.504	Ethanolamines		1
eicosanodioate	JJOJFIHJIRWASH-UHFFFAOYSA-N	75502	C(CCCCCCCCCC(=O)O)CCCCCCCCC(=O)O	0.44	0.98	75502	9	7.972	O=FA_20_1		1
1-methylnicotinamide	LDHMAVIPBRSVRG-UHFFFAOYSA-N	10129985	C[N+]1=CC=CC(=C1)C(=N)[O-]	0.45	0.98	10129985	12	1.022			1
tyrosine	OUYCCCASQSFEME-QMMMGPOBSA-N	6057	C1=CC(=CC=C1C[C@@H](C(=O)O)N)O	0.45	0.98	6057	61	-2.711	Amino Acids, Aromatic		1
laurylcarnitine (C12)	FUJLYHJROOYKRA-UHFFFAOYSA-N	10427569	CCCCCCCCCCCC(=O)OC(CC(=O)[O-])C[N+](C)(C)C	0.45	1	10427569	5	4.373	Carnitine		1
glycerol 3-phosphate	AWUCVROLDVIAJX-UHFFFAOYSA-N	754	C(C(COP(=O)(O)O)O)O	0.45	1.1	754	81	-3.109	Glycerophosphates		1
glucuronate	AEMOLEFTQBMNLQ-WAXACMCWSA-N	444791	[C@@H]1([C@@H]([C@H](O[C@@H]([C@@H]1O)O)C(=O)O)O)O	0.45	1	444791	7	-1.54	Hexuronic Acids		1
alanine	QNAYBMKLOCPYGJ-REOHCLBHSA-N	5950	C[C@@H](C(=O)O)N	0.46	1	5950	64	-2.824	Amino Acids		1
etiocholanolone glucuronide	VFUIRAVTUVCQTF-UHFFFAOYSA-N	270605	CC12CCC(CC1CCC3C2CCC4(C3CCC4=O)C)OC5C(C(C(C(O5)C(=O)O)O)O)O	0.46	0.96	270605	97	3.349	Cholestanols		1
1-stearoyl-2-docosahexaenoyl-GPE (18:0/22:6)*	XYYHNDVKALDFHQ-OXHZBIAZSA-N	9546798	CCCCCCCCCCCCCCCCCC(=O)OC[C@H](COP(=O)(O)OCCN)OC(=O)CC/C=C\C/C=C\C/C=C\C/C=C\C/C=C\C/C=C\CC	0.46	0.84	9546798	4	15.815	Phosphatidylethanolamines		1
beta-guanidinopropanoate	KMXXSJLYVJEBHI-UHFFFAOYSA-N	67701	C(CN=C(N)N)C(=O)O	0.46	0.82	67701	82	-1.304	Propionates		1
paraxanthine	QUNWUDVFRNGTCO-UHFFFAOYSA-N	4687	CN1C=NC2=C1C(=O)N(C(=O)N2)C	0.46	1	4687	1	-0.637	Xanthines	b	1
gamma-glutamylglycine	ACIJGUBIMXQCMF-BYPYZUCNSA-N	165527	C(CC(=O)NCC(=O)O)[C@@H](C(=O)O)N	0.47	1	165527	10	-4.177	Dipeptides		1
adrenate (22:4n6)	TWSWSIQAPQLDBP-DOFZRALJSA-N	5497181	CCCCC/C=C\C/C=C\C/C=C\C/C=C\CCCCCC(=O)O	0.47	1	5497181	2	9.487	UnSaturated FA		1
N-acetylalanine	KTHDTJVBEPMMGL-VKHMYHEASA-N	88064	C[C@@H](C(=O)O)NC(=O)C	0.48	1.1	88064	73	-0.382	Dipeptides		1
ethylmalonate	UKFXDFUAPNAMPJ-UHFFFAOYSA-N	11756	CCC(C(=O)O)C(=O)O	0.48	0.99	11756	70	0.484	Malonates		1
piperine	MXXWOMGUGJBKIW-YPCIICBESA-N	638024	C1CCN(CC1)C(=O)/C=C/C=C/C2=CC3=C(C=C2)OCO3	0.48	0.97	638024	83	2.518	Polyunsaturated Alkamides		1
dihomo-linoleate (20:2n6)	XSXIVVZCUAHUJO-HZJYTTRNSA-N	6439848	CCCCC/C=C\C/C=C\CCCCCCCCCC(=O)O	0.48	1.1	6439848	2	9.003	UnSaturated FA		1
2-hydroxy-3-methylvalerate	RILPIWOPNGRASR-UHFFFAOYSA-N	164623	CCC(C)C(C(=O)O)O	0.48	1	164623	38	0.633	Valerates		1
1,7-dimethylurate	NOFNCLGCUJJPKU-UHFFFAOYSA-N	91611	CN1C2=C(NC1=O)NC(=O)N(C2=O)C	0.48	1	91611	1	-1.336	Xanthines	b	1
bilirubin (Z,Z)	BPYKTIZUTYGOLE-IFADSCNNSA-N	5280352	CC1=C(NC(=C1CCC(=O)O)CC2=C(C(=C(N2)/C=C\3/C(=C(C(=O)N3)C)C=C)C)CCC(=O)O)/C=C\4/C(=C(C(=O)N4)C=C)C	0.49	1	5280352	26	2.167	Bile Pigments		1
cholate	BHQCQFFYRZLCQQ-OELDTZBJSA-N	221493	C[C@H](CCC(=O)O)[C@H]1CC[C@@H]2[C@@]1([C@H](C[C@H]3[C@H]2[C@@H](C[C@H]4[C@@]3(CC[C@H](C4)O)C)O)O)C	0.49	0.97	221493	8	4.093	Cholic Acids	e	1
gamma-glutamyltryptophan	CATMPQFFVNKDEY-UHFFFAOYSA-N	3989307	C1=CC=C2C(=C1)C(=CN2)CC(C(=O)O)NC(=O)CCC(C(=O)O)N	0.49	0.95	3989307	11	-2.85	Dipeptides		1
urea	XSQUKJJJFZCRTK-UHFFFAOYSA-N	1176	C(=O)(N)N	0.49	0.97	1176	132	-1.686	Organic Chemicals		1
gulonate*	RGHNJXZEOKUKBD-NRXMZTRTSA-N	9794176	C([C@@H]([C@H]([C@H]([C@H](C(=O)O)O)O)O)O)O	0.49	1.1	9794176	7	-3.739	Sugar Acids		1
ectoine	WQXNXVUDBPYKBA-YFKPBYRVSA-N	126041	CC1=NCC[C@H](N1)C(=O)O	0.5	0.97	126041	84	-0.187	Amino Acids, Diamino		1
glycoursodeoxycholate	GHCZAUBVMUEKKP-XROMFQGDSA-N	12310288	C[C@H](CCC(=O)NCC(=O)O)[C@H]1CC[C@@H]2[C@@]1(CC[C@H]3[C@H]2[C@H](C[C@H]4[C@@]3(CC[C@H](C4)O)C)O)C	0.5	1.1	12310288	14	5.35	Deoxycholic Acid		1
7-methylguanine	FZWGECJQACGGTI-UHFFFAOYSA-N	135398679	CN1C=NC2=C1C(=O)NC(=N2)N	0.5	0.99	135398679	1	-0.888	Hypoxanthines	b	1
1-methylimidazoleacetate	ZHCKPJGJQOPTLB-UHFFFAOYSA-N	75810	CN1C=C(N=C1)CC(=O)O	0.51	0.98	75810	112	0.017	Imidazoles		1
17-methylstearate	YETXGSGCWODRAA-UHFFFAOYSA-N	3083779	CC(C)CCCCCCCCCCCCCCCC(=O)O	0.51	1.1	3083779	16	9.216	Saturated FA		1
beta-alanine	UCMIRNVEIXFBKS-UHFFFAOYSA-N	239	C(CN)C(=O)O	0.52	0.98	239	116	-1.026	Amino Acids		1
aspartate	CKLJMWTZIZZHCS-REOHCLBHSA-N	5960	C([C@@H](C(=O)O)N)C(=O)O	0.52	1.4	5960	72	-3.707	Amino Acids, Acidic		1
N-formylanthranilic acid	LLLPDUXGHXIXIW-UHFFFAOYSA-N	101399	C1=CC=C(C(=C1)C(=O)O)NC=O	0.52	0.96	101399	128	0.332	ortho-Aminobenzoates		1
gluconate	RGHNJXZEOKUKBD-SQOUGZDYSA-N	10690	C([C@H]([C@H]([C@@H]([C@H](C(=O)O)O)O)O)O)O	0.52	0.96	10690	7	-3.739	Sugar Acids		1
choline phosphate	YHHSONZFOIEMCP-UHFFFAOYSA-O	1014	C[N+](C)(C)CCOP(=O)(O)O	0.52	0.97	1014	85	-2.066	Trimethyl Ammonium Compounds		1
5-dodecenoate (12:1n7)	IJBFSOLHRKELLR-FPLPWBNLSA-N	5312378	CCCCCC/C=C\CCCC(=O)O	0.52	1	5312378	36	4.778	UnSaturated FA		1
ursodeoxycholate	RUDATBOHQWOJDD-UZVSRGJWSA-N	31401	C[C@H](CCC(=O)O)[C@H]1CC[C@@H]2[C@@]1(CC[C@H]3[C@H]2[C@H](C[C@H]4[C@@]3(CC[C@H](C4)O)C)O)C	0.53	1.1	31401	8	6.178	Deoxycholic Acid	e	1
1-palmitoyl-2-arachidonoyl-GPE (16:0/20:4)*	DRIVXEVMDWCWLI-CAQMIEAISA-N	9546800	CCCCCCCCCCCCCCCC(=O)OC[C@H](COP(=O)(O)OCCN)OC(=O)CCC/C=C\C/C=C\C/C=C\C/C=C\CCCCC	0.53	1	9546800	4	14.193	Phosphatidylethanolamines		1
spermidine	ATHGHQPFGPMSJY-UHFFFAOYSA-N	1102	C(CCNCCCN)CN	0.53	1.2	1102	46	-0.654	Putrescine		1
dimethylglycine	FFDGPVCHZBVARC-UHFFFAOYSA-N	673	CN(C)CC(=O)O	0.53	0.99	673	39	-0.555	Trimethyl Ammonium Compounds		1
glycochenodeoxycholate	GHCZAUBVMUEKKP-GYPHWSFCSA-N	12544	C[C@H](CCC(=O)NCC(=O)O)[C@H]1CC[C@@H]2[C@@]1(CC[C@H]3[C@H]2[C@@H](C[C@H]4[C@@]3(CC[C@H](C4)O)C)O)C	0.54	1	12544	14	5.35	Deoxycholic Acid		1
indolelactate	XGILAAMKEQUXLS-UHFFFAOYSA-N	92904	C1=CC=C2C(=C1)C(=CN2)CC(C(=O)O)O	0.54	1	92904	40	0.21	Indoles		1
cortisol	JYGXADMDTFJGBT-VWUMJDOOSA-N	5754	C[C@]12CCC(=O)C=C1CC[C@@H]3[C@@H]2[C@H](C[C@]4([C@H]3CC[C@@]4(C(=O)CO)O)C)O	0.54	0.99	5754	115	0.553	Pregnenes		1
N-palmitoyl-sphinganine (d18:0/16:0)	GCGTXOVNNFGTPQ-JHOUSYSJSA-N	5283572	CCCCCCCCCCCCCCC[C@H]([C@H](CO)NC(=O)CCCCCCCCCCCCCCC)O	0.54	1	5283572	28	14.194	Saturated_Ceramides		1
2,3-dihydroxyisovalerate	JTEYKUFKXGDTEU-UHFFFAOYSA-N	677	CC(C)(C(C(=O)O)O)O	0.55	0.97	677	25	-0.846	Butyrates		1
gamma-glutamylisoleucine*	SNCKGJWJABDZHI-UHFFFAOYSA-N	14253342	CCC(C)C(C(=O)O)NC(=O)CCC(C(=O)O)N	0.55	0.92	14253342	35	-2.427	Dipeptides		1
malonate	OFOBLEOULBTSOW-UHFFFAOYSA-N	867	C(C(=O)O)C(=O)O	0.55	1	867	70	-0.299	Malonates		1
2-hydroxyoctanoate	JKRDADVRIYVCCY-UHFFFAOYSA-N	94180	CCCCCCC(C(=O)O)O	0.55	1	94180	17	2.043	OH-FA_8_0_1		1
1-(1-enyl-stearoyl)-2-arachidonoyl-GPE (P-18:0/20:4)*	URPXXNCTXCOATD-FXMFQVEGSA-N	9547058	CCCCCCCCCCCCCCCC/C=C\OC[C@H](COP(=O)(O)OCCN)OC(=O)CCC/C=C\C/C=C\C/C=C\C/C=C\CCCCC	0.55	1.1	9547058	4	15.869	Phosphatidylethanolamines		1
mannitol/sorbitol	FBPFZTCFMRRESA-JGWLITMVSA-N	5780	C([C@H]([C@H]([C@@H]([C@H](CO)O)O)O)O)O	0.55	1	5780	23	-3.896	Sugar Alcohols		1
decanoylcarnitine (C10)	LZOSYCMHQXPBFU-UHFFFAOYSA-N	10245190	CCCCCCCCCC(=O)OC(CC(=O)[O-])C[N+](C)(C)C	0.56	1	10245190	5	3.235	Carnitine		1
2-hydroxynervonate*	UFOOFOUFKSIFCD-KTKRTIGZSA-N	5312783	CCCCCCCC/C=C\CCCCCCCCCCCCC(C(=O)O)O	0.56	1.1	5312783	53	10.631	DiHOME		1
pregnenolone sulfate	DIJBBUIOWGGQOP-QGVNFLHTSA-N	105074	CC(=O)[C@H]1CC[C@@H]2[C@@]1(CC[C@H]3[C@H]2CC=C4[C@@]3(CC[C@@H](C4)OS(=O)(=O)O)C)C	0.56	1	105074	18	3.536	Pregnenes		1
nervonate (24:1n9)*	GWHCXVQVJPWHRF-KTKRTIGZSA-N	5281120	CCCCCCCC/C=C\CCCCCCCCCCCCCC(=O)O	0.56	1.1	5281120	2	11.606	UnSaturated FA		1
ribonate	QXKAIJAYHKCRRA-BXXZVTAOSA-N	5460677	C([C@H]([C@H]([C@H](C(=O)O)O)O)O)O	0.57	1.2	5460677	43	-3.067	Glutarates		1
glycine	DHMQDGOQFOQNFH-UHFFFAOYSA-N	750	C(C(=O)O)N	0.58	1	750	75	-3.35	Amino Acids		1
2-methylbutyrylcarnitine (C5)	IHCPDBBYTYJYIL-UHFFFAOYSA-N	6426901	CCC(C)C(=O)OC(CC(=O)[O-])C[N+](C)(C)C	0.58	1	6426901	51	0.114	Carnitine		1
2-aminooctanoate	AKVBCGQVQXPRLD-UHFFFAOYSA-N	69522	CCCCCCC(C(=O)O)N	0.58	1	69522	37	-0.19	Dicarboxylic Acids		1
trans-4-hydroxyproline	PMMYEEVYMWASQN-DMTCNVIQSA-N	5810	C1[C@H](CN[C@@H]1C(=O)O)O	0.58	1	5810	44	-0.786	Imino Acids		1
gamma-glutamyltyrosine	VVLXCWVSSLFQDS-QWRGUYRKSA-N	94340	C1=CC(=CC=C1C[C@@H](C(=O)O)NC(=O)CC[C@@H](C(=O)O)N)O	0.59	0.95	94340	105	-3.538	Dipeptides		1
1,5-anhydroglucitol (1,5-AG)	MPCAJMNYNOGXPB-SLPGGIOYSA-N	64960	C1[C@@H]([C@H]([C@@H]([C@H](O1)CO)O)O)O	0.59	0.99	64960	48	-1.591	Hexoses		1
pristanate	PAHGJZDQXIOYTH-UHFFFAOYSA-N	123929	CC(C)CCCC(C)CCCC(C)CCCC(C)C(=O)O	0.6	0.93	123929	16	8.818	Saturated FA		1
N-acetyltaurine	CXJAAWRLVGAKDV-UHFFFAOYSA-N	159864	CC(=O)NCCS(=O)(=O)O	0.61	0.98	159864	20	-1.402			1
N4-acetylcytidine	NIDVTARKFBZMOT-PEBGCTIMSA-N	107461	CC(=O)NC1=NC(=O)N(C=C1)[C@H]2[C@@H]([C@@H]([C@H](O2)CO)O)O	0.61	0.95	107461	34	-2.122	Pyrimidine Nucleosides		1
5,6-dihydrothymine	NBAKTGXDIBVZOO-UHFFFAOYSA-N	93556	CC1CNC(=O)NC1=O	0.62	1.1	93556	131	-0.867	Barbiturates		1
linoleamide (18:2n6)	SFIHQZFZMWZOJV-HZJYTTRNSA-N	6435901	CCCCC/C=C\C/C=C\CCCCCCCC(=O)N	0.62	1.1	6435901	91	7.137	Oleic Acids	g	1
2'-O-methylcytidine	RFCQJGFZUQFYRF-ZOQUXTDFSA-N	150971	CO[C@@H]1[C@@H]([C@H](O[C@H]1N2C=CC(=NC2=O)N)CO)O	0.62	1	150971	34	-2.103	Pyrimidine Nucleosides		1
5alpha-androstan-3beta,17beta-diol disulfate	CBMYJHIOYJEBSB-YSZCXEEOSA-N	242332	C[C@]12CC[C@@H](C[C@@H]1CC[C@@H]3[C@@H]2CC[C@]4([C@H]3CC[C@@H]4O)C)O	0.63	0.99	242332	8	4.907	Androstanols	e	1
stachydrine	CMUNUTVVOOHQPW-LURJTMIESA-N	115244	C[N+]1(CCC[C@H]1C(=O)[O-])C	0.63	1	115244	60	-0.618	Imino Acids		1
threonate	JPIJQSOTBSSVTP-GBXIJSLDSA-N	151152	C([C@H]([C@@H](C(=O)O)O)O)O	0.64	1.1	151152	25	-2.395	Butyrates		1
4-guanidinobutanoate	TUHVEAJXIMEOSA-UHFFFAOYSA-N	500	C(CC(=O)O)CN=C(N)N	0.64	1.1	500	82	-0.946	Guanidines		1
1-oleoyl-2-linoleoyl-GPE (18:1/18:2)*	GKAFCSRKMWFPSJ-RJXNKANHSA-N	9546753	CCCCCCCC/C=C\CCCCCCCC(=O)OC[C@H](COP(=O)(O)OCCN)OC(=O)CCCCCCC/C=C\C/C=C\CCCCC	0.64	1	9546753	4	14.331	Phosphatidylethanolamines		1
N-acetylneuraminate	SQVRNKJHWKZAKO-LUWBGTNYSA-N	439197	CC(=O)N[C@@H]1[C@H](CC(O[C@H]1[C@@H]([C@@H](CO)O)O)(C(=O)O)O)O	0.64	0.95	439197	28	-3.525	Sialic Acids		1
gamma-glutamylphenylalanine	XHHOHZPNYFQJKL-QWRGUYRKSA-N	111299	C1=CC=C(C=C1)C[C@@H](C(=O)O)NC(=O)CC[C@@H](C(=O)O)N	0.65	1	111299	98	-2.402	Dipeptides		1
N-acetylglutamate	RFMMMVDNIPUKGG-YFKPBYRVSA-N	70914	CC(=O)N[C@@H](CCC(=O)O)C(=O)O	0.65	1	70914	78	-0.907	Glutamates		1
glutarate (pentanedioate)	JFCQEDHGNNZCLN-UHFFFAOYSA-N	743	C(CC(=O)O)CC(=O)O	0.65	1.1	743	122	-0.352	Glutarates		1
N-acetyltryptophan	DZTHIGRZJZPRDV-LBPRGKRZSA-N	700653	CC(=O)N[C@@H](CC1=CNC2=CC=CC=C21)C(=O)O	0.65	0.96	700653	11	0.419	Indoles		1
acisoga	OAUYENAPBFTAQT-UHFFFAOYSA-N	129397	CC(=O)NCCCN1CCCC1=O	0.65	0.98	129397	46	-0.312	Pyrrolidinones		1
1-methylurate	QFDRTQONISXGJA-UHFFFAOYSA-N	69726	CN1C(=O)C2=C(NC(=O)N2)NC1=O	0.65	0.94	69726	1	-1.049	Xanthines	b	1
vanillylmandelate (VMA)	CGQCWMIAEPEHNQ-UHFFFAOYSA-N	1245	COC1=C(C=CC(=C1)C(C(=O)O)O)O	0.66	1.1	1245	126	-0.634	Acids, Carbocyclic		1
threonine	AYFVYJQAPQTCCC-GBXIJSLDSA-N	6288	C[C@H]([C@@H](C(=O)O)N)O	0.66	1	6288	119	-3.496	Amino Acids		1
deoxycholate	KXGVEGMKQFWNSR-LLQZFEROSA-N	222528	C[C@H](CCC(=O)O)[C@H]1CC[C@@H]2[C@@]1([C@H](C[C@H]3[C@H]2CC[C@H]4[C@@]3(CC[C@H](C4)O)C)O)C	0.66	0.95	222528	8	5.756	Cholic Acids	e	1
gamma-CEHC	VMJQLPNCUPGMNQ-UHFFFAOYSA-N	133098	CC1=C(C=C2CCC(OC2=C1C)(C)CCC(=O)O)O	0.66	1	133098	79	1.848	Chromans		1
N-acetylserine	JJIHLJJYMXLCOY-BYPYZUCNSA-N	65249	CC(=O)N[C@@H](CO)C(=O)O	0.66	0.98	65249	110	-1.514	Dipeptides		1
1-palmitoyl-2-linoleoyl-GPE (16:0/18:2)	HBZNVZIRJWODIB-NHCUFCNUSA-N	9546747	CCCCCCCCCCCCCCCC(=O)OC[C@H](COP(=O)(O)OCCN)OC(=O)CCCCCCC/C=C\C/C=C\CCCCC	0.66	1	9546747	4	13.709	Phosphatidylethanolamines		1
pyrraline	VTYFITADLSVOAS-NSHDSACASA-N	122228	C1=C(N(C(=C1)C=O)CCCC[C@@H](C(=O)O)N)CO	0.66	0.93	122228	57	-2.352	Pyrroles		1
hypotaurine	VVIUBCNYACGLLV-UHFFFAOYSA-N	107812	C(CS(=O)O)N	0.67	1.2	107812	20	-2.554	Alkanesulfonic Acids		1
cysteine	XUJNEKJLAYXESH-REOHCLBHSA-N	5862	C([C@@H](C(=O)O)N)S	0.67	1	5862	74	-2.575	Amino Acids, Sulfur		1
gamma-glutamylthreonine	GWNXFCYUJXASDX-UHFFFAOYSA-N	76078708	CC(C(C(=O)O)NC(=O)CCC(C(=O)O)N)O	0.67	0.99	76078708	10	-4.323	Dipeptides		1
3-methyl-2-oxobutyrate	QHKABHOOEWYVLI-UHFFFAOYSA-N	49	CC(C)C(=O)C(=O)O	0.67	0.97	49	71	0.12	Keto Acids		1
malate	BJEPYKJPYRNKOW-UHFFFAOYSA-N	525	C(C(C(=O)O)O)C(=O)O	0.68	1	525	25	-1.474	Dicarboxylic Acids		1
N-acetylphenylalanine	CBQJSKKFNMDLON-JTQLQIEISA-N	74839	CC(=O)N[C@@H](CC1=CC=CC=C1)C(=O)O	0.68	0.99	74839	58	0.867	Dipeptides		1
indolepropionate	GOLXRNDWAUTYKT-UHFFFAOYSA-N	3744	C1=CC=C2C(=C1)C(=CN2)CCC(=O)O	0.68	0.97	3744	11	0.974	Indoles		1
octadecanedioate	BNJOQKFENDDGSC-UHFFFAOYSA-N	70095	C(CCCCCCCCC(=O)O)CCCCCCCC(=O)O	0.68	0.96	70095	9	6.834	O=FA_20_1		1
docosadioate	DGXRZJSPDXZJFG-UHFFFAOYSA-N	244872	C(CCCCCCCCCCC(=O)O)CCCCCCCCCC(=O)O	0.68	0.97	244872	9	9.11	O=FA_20_1		1
uridine	DRTQHJPVMGBUCF-XVFCMESISA-N	6029	C1=CN(C(=O)NC1=O)[C@H]2[C@@H]([C@@H]([C@H](O2)CO)O)O	0.68	1	6029	65	-2.117	Pyrimidine Nucleosides		1
p-cresol-glucuronide*	JPAUCQAJHLSMQW-XPORZQOISA-N	154035	CC1=CC=C(C=C1)O[C@H]2[C@@H]([C@H]([C@@H]([C@H](O2)C(=O)O)O)O)O	0.69	0.87	154035	126	0.189	Cresols		1
2-hydroxypalmitate	JGHSBPIZNUXPLA-UHFFFAOYSA-N	92836	CCCCCCCCCCCCCCC(C(=O)O)O	0.69	1.1	92836	17	6.595	OH-FA_16_0_1		1
phenol sulfate	CTYRPMDGLDAWRQ-UHFFFAOYSA-N	74426	C1=CC=C(C=C1)OS(=O)(=O)O	0.69	1	74426	45	-0.9	Sulfuric Acids		1
4-vinylphenol sulfate	IETVQHUKTKKBFF-UHFFFAOYSA-N	6426766	C=CC1=CC=C(C=C1)OS(=O)(=O)O	0.7	0.96	6426766	95	-0.045	Cresols		1
1-palmitoyl-2-linoleoyl-GPC (16:0/18:2)	JLPULHDHAOZNQI-ZTIMHPMXSA-N	5287971	CCCCCCCCCCCCCCCC(=O)OC[C@H](COP(=O)([O-])OCC[N+](C)(C)C)OC(=O)CCCCCCC/C=C\C/C=C\CCCCC	0.7	0.99	5287971	6	14.147	Unsaturated_Phosphatidylcholines		1
erythronate*	JPIJQSOTBSSVTP-PWNYCUMCSA-N	2781043	C([C@H]([C@H](C(=O)O)O)O)O	0.71	1	2781043	25	-2.395	Butyrates		1
pro-hydroxy-pro	ONPXCLZMBSJLSP-ALKRTJFJSA-N	11673055	C1C[C@H](NC1)C(=O)N2CC(C[C@H]2C(=O)O)O	0.71	1	11673055	44	-1.292	Dipeptides		1
arabitol/xylitol	HEBKCHPVOIAQTA-NGQZWQHPSA-N	6912	C([C@H](C([C@H](CO)O)O)O)O	0.71	1	6912	23	-3.224	Sugar Alcohols		1
1-stearoyl-2-linoleoyl-GPE (18:0/18:2)*	YDTWOEYVDRKKCR-KNERPIHHSA-N	9546749	CCCCCCCCCCCCCCCCCC(=O)OC[C@H](COP(=O)(O)OCCN)OC(=O)CCCCCCC/C=C\C/C=C\CCCCC	0.72	0.98	9546749	4	14.847	Phosphatidylethanolamines		1
N-acetylmethionine	XUYPXLNMDZIRQH-LURJTMIESA-N	448580	CC(=O)N[C@@H](CCSC)C(=O)O	0.73	0.94	448580	63	0.589	Peptides		1
palmitate (16:0)	IPCSVZSSVZVIGE-UHFFFAOYSA-N	985	CCCCCCCCCCCCCCCC(=O)O	0.74	0.99	985	3	7.57	Saturated FA		1
xanthurenate	FBZONXHGGPHHIY-UHFFFAOYSA-N	5699	C1=CC2=C(C(=C1)O)NC(=CC2=O)C(=O)O	0.74	0.95	5699	109	0.802	Xanthurenates		1
2-aminoheptanoate	RDFMDVXONNIGBC-UHFFFAOYSA-N	227939	CCCCCC(C(=O)O)N	0.76	0.99	227939	37	-0.759	Dicarboxylic Acids		1
3-methyl-2-oxovalerate	JVQYSWDUAOAHFM-UHFFFAOYSA-N	47	CCC(C)C(=O)C(=O)O	0.76	1	47	104	0.689	Keto Acids		1
1-palmitoyl-2-oleoyl-GPE (16:0/18:1)	FHQVHHIBKUMWTI-OTMQOFQLSA-N	5283496	CCCCCCCCCCCCCCCC(=O)OC[C@H](COP(=O)(O)OCCN)OC(=O)CCCCCCC/C=C\CCCCCCCC	0.76	1	5283496	4	14.036	Phosphatidylethanolamines		1
1-stearoyl-2-arachidonoyl-GPE (18:0/20:4)	ANRKEHNWXKCXDB-BHFWLYLHSA-N	5289133	CCCCCCCCCCCCCCCCCC(=O)OC[C@H](COP(=O)(O)OCCN)OC(=O)CCC/C=C\C/C=C\C/C=C\C/C=C\CCCCC	0.76	0.96	5289133	4	15.331	Phosphatidylethanolamines		1
15-methylpalmitate	IIUXHTGBZYEGHI-UHFFFAOYSA-M	17903417	CC(C)CCCCCCCCCCCCCC(=O)[O-]	0.76	1	17903417	16	7.597	Saturated FA		1
taurodeoxycholate	AWDRATDZQPNJFN-VAYUFCLWSA-N	2733768	C[C@H](CCC(=O)NCCS(=O)(=O)O)[C@H]1CC[C@@H]2[C@@]1([C@H](C[C@H]3[C@H]2CC[C@H]4[C@@]3(CC[C@H](C4)O)C)O)C	0.77	1	2733768	24	4.434	Taurocholic Acid		1
3-phenylpropionate (hydrocinnamate)	XMIIGOLPHOKFCH-UHFFFAOYSA-N	107	C1=CC=C(C=C1)CCC(=O)O	0.78	1	107	62	1.633	Acids, Carbocyclic		1
dehydroisoandrosterone sulfate (DHEA-S)	CZWCKYRVOZZJNM-USOAJAOKSA-N	12594	C[C@]12CC[C@H]3[C@H]([C@@H]1CCC2=O)CC=C4[C@@]3(CC[C@@H](C4)OS(=O)(=O)O)C	0.78	0.98	12594	18	1.738	Androstenols		1
3beta,7alpha-dihydroxy-5-cholestenoate	GYJSAWZGYQXRBS-GRJZKGIBSA-N	3081084	C[C@H](CCCC(C)C(=O)O)[C@H]1CC[C@@H]2[C@@]1(CC[C@H]3[C@H]2[C@@H](C=C4[C@@]3(CC[C@@H](C4)O)C)O)C	0.78	0.97	3081084	59	6.61	Cholestenes		1
epiandrosterone sulfate	ZMITXKRGXGRMKS-LUJOEAJASA-N	9929317	C[C@]12CC[C@@H](C[C@@H]1CC[C@@H]3[C@@H]2CC[C@]4([C@H]3CCC4=O)C)OS(=O)(=O)O	0.78	0.96	9929317	90	3.003	Cholic Acids		1
9,10-DiHOME	XEBKSQSGNGRGDW-YFHOEESVSA-N	9966640	CCCCC/C=C\CC(C(CCCCCCCC(=O)O)O)O	0.78	1.1	9966640	53	4.866	DiHOME		1
1-methylhistidine	BRMWTNUJHUMWMS-LURJTMIESA-N	92105	CN1C=C(N=C1)C[C@@H](C(=O)O)N	0.78	1	92105	88	-2.811	Histidine		1
17alpha-hydroxypregnenolone 3-sulfate	OMOKWYAQVYBHMG-QUPIPBJSSA-N	152971	CC(=O)[C@]1(CC[C@@H]2[C@@]1(CC[C@H]3[C@H]2CC=C4[C@@]3(CCC(C4)OS(=O)(=O)O)C)C)O	0.78	1	152971	18	1.745	Pregnenes		1
cortisone	MFYSYFVPBJMHGN-ZPOLXVRWSA-N	222786	C[C@]12CCC(=O)C=C1CC[C@@H]3[C@@H]2C(=O)C[C@]4([C@H]3CC[C@@]4(C(=O)CO)O)C	0.78	1	222786	115	0.14	Pregnenes		1
N6-carbamoylthreonyladenosine	UNUYMBPXEFMLNW-DWVDDHQFSA-N	161466	C[C@H]([C@@H](C(=O)O)NC(=O)NC1=NC=NC2=C1N=CN2[C@H]3[C@@H]([C@@H]([C@H](O3)CO)O)O)O	0.78	0.98	161466	19	-3.42	Purine Nucleosides		1
sulfate*	QAOWNCQODCNURD-UHFFFAOYSA-N	1118	OS(=O)(=O)O	0.78	1	1118	86	-1.764	Sulfuric Acids		1
dopamine 3-O-sulfate	NZKRYJGNYPYXJZ-UHFFFAOYSA-N	122136	C1=CC(=C(C=C1CCN)OS(=O)(=O)O)O	0.79	0.95	122136	61	-1.528	Amino Acids, Aromatic		1
N-acetylcarnosine	BKAYIFDRRZZKNF-VIFPVBQESA-N	9903482	CC(=O)NCCC(=O)N[C@@H](CC1=CN=CN1)C(=O)O	0.79	1	9903482	54	-1.657	Dipeptides		1
2-hydroxyhippurate (salicylurate)	ONJSZLXSECQROL-UHFFFAOYSA-N	10253	C1=CC=C(C(=C1)C(=O)NCC(=O)O)O	0.79	0.98	10253	66	0.509	Hippurates	d	1
flavin adenine dinucleotide (FAD)	VWWQXMAJTJZDQX-UYBVJOGSSA-N	643975	CC1=CC2=C(C=C1C)N(C3=NC(=O)NC(=O)C3=N2)C[C@@H]([C@@H]([C@@H](COP(=O)(O)OP(=O)(O)OC[C@@H]4[C@H]([C@H]([C@@H](O4)N5C=NC6=C5N=CN=C6N)O)O)O)O)O	0.79	0.96	643975	19	-6.285	Riboflavin		1
stearidonate (18:4n3)	JIWBIWFOSCKQMA-LTKCOYKYSA-N	5312508	CC/C=C\C/C=C\C/C=C\C/C=C\CCCCC(=O)O	0.79	0.91	5312508	36	7.211	UnSaturated FA		1
3-hydroxylaurate	MUCMKTPAZLSKTL-UHFFFAOYSA-N	94216	CCCCCCCCCC(CC(=O)O)O	0.8	0.99	94216	15	3.842	OH-FA_8_0_1		1
glycerophosphoethanolamine	JZNWSCPGTDBMEW-UHFFFAOYSA-N	123874	C(COP(=O)(O)OCC(CO)O)N	0.8	1	123874	127	-3.366	Phosphatidylethanolamines		1
formiminoglutamate	NRXIKWMTVXPVEF-BYPYZUCNSA-N	439233	C(CC(=O)O)[C@@H](C(=O)O)N=CN	0.81	0.99	439233	42	-3.54	Glutarates		1
taurine	XOAAWQZATWQOTB-UHFFFAOYSA-N	1123	C(CS(=O)(=O)O)N	0.82	1.3	1123	20	-1.678	Alkanesulfonic Acids		1
1-palmitoyl-2-docosahexaenoyl-GPC (16:0/22:6)	IESVDEZGAHUQJU-ZLBXKVHBSA-N	6441886	CCCCCCCCCCCCCCCC(=O)OC[C@H](COP(=O)([O-])OCC[N+](C)(C)C)OC(=O)CC/C=C\C/C=C\C/C=C\C/C=C\C/C=C\C/C=C\CC	0.82	1	6441886	6	15.115	Unsaturated_Phosphatidylcholines		1
adipate	WNLRTRBMVRJNCN-UHFFFAOYSA-N	196	C(CCC(=O)O)CC(=O)O	0.83	0.99	196	9	0.006	Dicarboxylic Acids		1
maleate	VZCYOOQTPOCHFL-UPHRSURJSA-N	444266	C(=C\C(=O)O)\C(=O)O	0.83	1	444266	50	-0.416	Dicarboxylic Acids		1
arabinose	PYMYPHUHKUWMLA-WDCZJNDASA-N	66308	C([C@H]([C@H]([C@@H](C=O)O)O)O)O	0.83	0.99	66308	43	-2.653	Pentoses		1
cytidine	UHDGCWIWMRVCDJ-XVFCMESISA-N	6175	C1=CN(C(=O)N=C1N)[C@H]2[C@@H]([C@@H]([C@H](O2)CO)O)O	0.83	0.77	6175	34	-2.193	Pyrimidine Nucleosides		1
pseudouridine	PTJWIQPHWPFNBW-GBNDHIKLSA-N	15047	C1=C(C(=O)NC(=O)N1)[C@H]2[C@@H]([C@@H]([C@H](O2)CO)O)O	0.83	1	15047	65	-2.477	Pyrimidine Nucleosides		1
1-(1-enyl-palmitoyl)-2-palmitoyl-GPC (P-16:0/16:0)*	PEWXKAOBUSBJLD-MCBGMKGZSA-N	11146967	CCCCCCCCCCCCCCCC(=O)O[C@H](CO/C=C\CCCCCCCCCCCCCC)COP(=O)([O-])OCC[N+](C)(C)C	0.83	0.99	11146967	6	14.39	Unsaturated_Phosphatidylcholines		1
tryptophan	QIVBCDIJIAJPQS-VIFPVBQESA-N	6305	C1=CC=C2C(=C1)C(=CN2)C[C@@H](C(=O)O)N	0.84	0.99	6305	11	-2.023	Amino Acids, Aromatic		1
catechol sulfate	MZPWKJZDOCIALD-UHFFFAOYSA-N	3083879	C1=CC=C(C(=C1)O)OS(=O)(=O)O	0.84	0.98	3083879	45	-0.763	Catechols		1
hyocholate	DKPMWHFRUGMUKF-KWXDGCAGSA-N	92805	C[C@H](CCC(=O)O)[C@H]1CC[C@@H]2[C@@]1(CC[C@H]3[C@H]2[C@@H]([C@@H]([C@H]4[C@@]3(CC[C@H](C4)O)C)O)O)C	0.84	0.99	92805	8	5.366	Cholic Acids	e	1
methylsuccinate	WXUAQHNMJWJLTG-UHFFFAOYSA-N	10349	CC(CC(=O)O)C(=O)O	0.84	0.99	10349	118	-0.417	Dicarboxylic Acids		1
myristoleoylcarnitine (C14:1)*	ABVVZYXTZLEOHP-OLHLWXQYSA-N	90659872	CCCC/C=C\CCCCCCCC(=O)O[C@H](CC(=O)[O-])C[N+](C)(C)C	0.84	0.99	90659872	30	4.995	NewCluster_30		1
4-hydroxychlorothalonil	MDQKYGOECVSPIW-UHFFFAOYSA-N	34217	C(#N)C1=C(C(=C(C(=C1Cl)C#N)Cl)Cl)O	0.84	1	34217	67	1.748	Nitriles		1
N-acetyltyrosine	CAHKINHBCWCHCF-JTQLQIEISA-N	68310	CC(=O)N[C@@H](CC1=CC=C(C=C1)O)C(=O)O	0.84	1	68310	105	-0.269	Oligopeptides		1
pregnanediol-3-glucuronide	ZFFFJLDTCLJDHL-JQYCEVDMSA-N	123796	C[C@@H]([C@H]1CC[C@@H]2[C@@]1(CC[C@H]3[C@H]2CC[C@H]4[C@@]3(CC[C@H](C4)O[C@H]5[C@@H]([C@H]([C@@H]([C@H](O5)C(=O)O)O)O)O)C)C)O	0.84	1	123796	97	5.455	Pregnanes		1
caprate (10:0)	GHVNFZFCNZKVNT-UHFFFAOYSA-N	2969	CCCCCCCCCC(=O)O	0.84	1	2969	3	4.156	Saturated FA		1
dihomo-linolenate (20:3n3 or n6)	HOBAELRKJCKHQD-QNEBEIHSSA-N	5280581	CCCCC/C=C\C/C=C\C/C=C\CCCCCCC(=O)O	0.84	0.99	5280581	2	8.676	UnSaturated FA		1
7-alpha-hydroxy-3-oxo-4-cholestenoate (7-Hoca)	SATGKQGFUDXGAX-MYWFJNCASA-N	3081085	C[C@H](CCCC(C)C(=O)O)[C@H]1CC[C@@H]2[C@@]1(CC[C@H]3[C@H]2[C@@H](CC4=CC(=O)CC[C@]34C)O)C	0.85	1	3081085	59	6.337	Cholestenes		1
gamma-glutamylleucine	MYFMARDICOWMQP-YUMQZZPRSA-N	151023	CC(C)C[C@@H](C(=O)O)NC(=O)CC[C@@H](C(=O)O)N	0.85	0.97	151023	35	-2.216	Dipeptides		1
cinnamoylglycine	YAADMLWHGMUGQL-VOTSOKGWSA-N	709625	C1=CC=C(C=C1)/C=C/C(=O)NCC(=O)O	0.85	1	709625	120	1.059	Ethanolamines		1
3-(4-hydroxyphenyl)lactate	JVGVDSSUAVXRDY-UHFFFAOYSA-N	9378	C1=CC(=CC=C1CC(C(=O)O)O)O	0.85	0.97	9378	108	-0.478	Phenols		1
21-hydroxypregnenolone disulfate	CBOVWLYQUCVTFA-WPWXJNKXSA-N	134595	C[C@]12CC[C@H]3[C@H]([C@@H]1CC[C@@H]2C(=O)COS(=O)(=O)O)CC=C4[C@@]3(CC[C@@H](C4)OS(=O)(=O)O)C	0.85	1	134595	18	1.202	Pregnenes		1
N6-acetyllysine	DTERQYGMUDWYAZ-ZETCQYMHSA-N	92832	CC(=O)NCCCC[C@@H](C(=O)O)N	0.86	1	92832	77	-2.673	Amino Acids, Diamino		1
androstenediol (3beta,17beta) disulfate (1)	UWPTUYJASNIIJM-LOVVWNRFSA-N	87120982	C[C@]12CC[C@H]3[C@H]([C@@H]1CC[C@@H]2OS(=O)(=O)O)CCC4=C[C@H](CC[C@]34C)OS(=O)(=O)O	0.86	1.1	87120982	76	1.314	Androstenols		1
5-acetylamino-6-amino-3-methyluracil	POQOTWQIYYNXAT-UHFFFAOYSA-N	88299	CC(=O)NC1=C(NC(=O)N(C1=O)C)N	0.86	1.1	88299	5	-1.05	Carnitine		1
succinylcarnitine (C4-DC)	HAEVNYBCYZZDFL-UHFFFAOYSA-N	71464481	C[N+](C)(C)CC(CC(=O)[O-])OC(=O)CCC(=O)O	0.86	1	71464481	13	-1.631	Carnitine		1
gamma-glutamyl-alpha-lysine	LNLLNTMHVMIMOG-YUMQZZPRSA-N	65254	C(CCN)C[C@@H](C(=O)O)NC(=O)CC[C@@H](C(=O)O)N	0.86	1	65254	96	-3.776	Dipeptides		1
beta-citrylglutamate	GAQNUGISBQJMKO-YFKPBYRVSA-J	72715786	C(CC(=O)[O-])[C@@H](C(=O)[O-])NC(=O)C(CC(=O)[O-])(CC(=O)[O-])O	0.86	0.94	72715786	78	-4.998	Glutamates		1
alpha-hydroxyisocaproate	LVRFTAZAXQPQHI-YFKPBYRVSA-N	83697	CC(C)C[C@@H](C(=O)O)O	0.86	1	83697	38	0.844	Valerates		1
isoursodeoxycholate	RUDATBOHQWOJDD-DNMBCGTGSA-N	127601	C[C@H](CCC(=O)O)[C@H]1CC[C@@H]2[C@@]1(CC[C@H]3[C@H]2[C@H](C[C@H]4[C@@]3(CC[C@@H](C4)O)C)O)C	0.87	1.2	127601	8	6.178	Cholic Acids	e	1
N-acetylhistidine	KBOJOGQFRVVWBH-ZETCQYMHSA-N	75619	CC(=O)N[C@@H](CC1=CN=CN1)C(=O)O	0.87	1	75619	54	-0.987	Dipeptides		1
O-methylcatechol sulfate	AQTYXAPIHMXAAV-UHFFFAOYSA-N	22473	COC1=CC=CC=C1OS(=O)(=O)O	0.87	1	22473	45	-0.871	Sulfuric Acids		1
3-hydroxyhexanoate	HPMGFDVTYHWBAG-UHFFFAOYSA-N	151492	CCCC(CC(=O)O)O	0.88	0.99	151492	15	0.428	OH-FA_8_0_1		1
myo-inositol	CDAISMWEOUEBRE-UHFFFAOYSA-N	892	C1(C(C(C(C(C1O)O)O)O)O)O	0.88	0.99	892	23	-1.458	Sugar Alcohols		1
bilirubin (E,E)*	BPYKTIZUTYGOLE-BMNRKXRESA-N	5315454	CC1=C(NC(=C1CCC(=O)O)CC2=C(C(=C(N2)/C=C/3\C(=C(C(=O)N3)C)C=C)C)CCC(=O)O)/C=C/4\C(=C(C(=O)N4)C=C)C	0.89	1	5315454	26	2.167	Bile Pigments		1
glycocholate	RFDAIACWWDREDC-FRVQLJSFSA-N	10140	C[C@H](CCC(=O)NCC(=O)O)[C@H]1CC[C@@H]2[C@@]1([C@H](C[C@H]3[C@H]2[C@@H](C[C@H]4[C@@]3(CC[C@H](C4)O)C)O)O)C	0.89	1	10140	14	3.265	Cholic Acids		1
creatine	CVSVTCORWBXHQV-UHFFFAOYSA-N	586	CN(CC(=O)O)C(=N)N	0.89	0.99	586	39	-2.404	Guanidines		1
3-hydroxyoctanoate	NDPLAKGOSZHTPH-UHFFFAOYSA-N	26613	CCCCCC(CC(=O)O)O	0.89	1	26613	15	1.566	OH-FA_8_0_1		1
5-methyluridine (ribothymidine)	DWRXFEITVBNRMK-JXOAFFINSA-N	445408	CC1=CN(C(=O)NC1=O)[C@H]2[C@@H]([C@@H]([C@H](O2)CO)O)O	0.89	0.99	445408	65	-1.936	Pyrimidine Nucleosides		1
androstenediol (3beta,17beta) monosulfate (1)	HXJFCUUBVWOORF-LOVVWNRFSA-N	13847309	C[C@]12CC[C@H]3[C@H]([C@@H]1CC[C@@H]2O)CC=C4[C@@]3(CC[C@@H](C4)OS(=O)(=O)O)C	0.9	1	13847309	76	2.345	Androstenols		1
propionylcarnitine (C3)	UFAHZIUFPNSHSL-UHFFFAOYSA-N	107738	CCC(=O)OC(CC(=O)[O-])C[N+](C)(C)C	0.9	0.98	107738	13	-0.748	Carnitine		1
4-hydroxyhippurate	ZMHLUFWWWPBTIU-UHFFFAOYSA-N	151012	C1=CC(=CC=C1C(=O)NCC(=O)O)O	0.9	0.86	151012	66	-0.56	Hippurates	d	1
taurocholate	WBWWGRHZICKQGZ-HZAMXZRMSA-N	6675	C[C@H](CCC(=O)NCCS(=O)(=O)O)[C@H]1CC[C@@H]2[C@@]1([C@H](C[C@H]3[C@H]2[C@@H](C[C@H]4[C@@]3(CC[C@H](C4)O)C)O)O)C	0.9	1	6675	24	2.771	Taurine		1
serotonin	QZAYGJVTTNCVMB-UHFFFAOYSA-N	5202	C1=CC2=C(C=C1O)C(=CN2)CCN	0.9	0.88	5202	121	0.366	Tryptamines		1
10-undecenoate (11:1n1)	FRPZMMHWLSIFAZ-UHFFFAOYSA-M	14891	C=CCCCCCCCCC(=O)[O-]	0.9	1	14891	2	3.878	UnSaturated FA		1
trigonelline (N'-methylnicotinate)	WWNNZCOKKKDOPX-UHFFFAOYSA-N	5570	C[N+]1=CC=CC(=C1)C(=O)[O-]	0.91	0.99	5570	12	0.135	Alkaloids		1
acetylcarnitine (C2)	RDHQFKQIGNGIED-UHFFFAOYSA-N	1	CC(=O)OC(CC(=O)[O-])C[N+](C)(C)C	0.91	0.96	1	13	-1.001	Carnitine		1
androsterone sulfate	ZMITXKRGXGRMKS-HLUDHZFRSA-N	159663	C[C@]12CC[C@H](C[C@@H]1CC[C@@H]3[C@@H]2CC[C@]4([C@H]3CCC4=O)C)OS(=O)(=O)O	0.91	0.99	159663	90	3.003	Cholic Acids		1
glycodeoxycholate	WVULKSPCQVQLCU-BUXLTGKBSA-N	3035026	C[C@H](CCC(=O)NCC(=O)O)[C@H]1CC[C@@H]2[C@@]1([C@H](C[C@H]3[C@H]2CC[C@H]4[C@@]3(CC[C@H](C4)O)C)O)C	0.91	0.96	3035026	14	4.928	Deoxycholic Acid		1
3-methylglutaconate	WKRBKYFIJPGYQC-DUXPYHPUSA-N	1551553	C/C(=C\C(=O)O)/CC(=O)O	0.91	0.98	1551553	50	-0.212	Glutarates		1
carboxyethyl-GABA	SRGQUICKDUQCKO-UHFFFAOYSA-N	2572	C(CC(=O)O)CNCCC(=O)O	0.92	1	2572	22	-0.738			1
adipoylcarnitine (C6-DC)	BSVHAXJKBCWVDA-UHFFFAOYSA-N	71296139	C[N+](C)(C)CC(CC(=O)[O-])OC(=O)CCCCC(=O)O	0.92	0.97	71296139	103	-0.915	Carnitine		1
gamma-glutamylvaline	AQAKHZVPOOGUCK-XPUUQOCRSA-N	7015683	CC(C)[C@@H](C(=O)O)NC(=O)CC[C@@H](C(=O)O)N	0.92	0.99	7015683	35	-2.996	Dipeptides		1
3-hydroxyhippurate	XDOFWFNMYJRHEW-UHFFFAOYSA-N	450268	C1=CC(=CC(=C1)O)C(=O)NCC(=O)O	0.92	0.96	450268	66	-0.56	Hippurates	d	1
orotidine	FKCRAVPPBFWEJD-XVFCMESISA-N	92751	C1=C(N(C(=O)NC1=O)[C@H]2[C@@H]([C@@H]([C@H](O2)CO)O)O)C(=O)O	0.93	0.98	92751	124	-2.489	Arabinonucleosides		1
1-arachidonoyl-GPE (20:4n6)*	ROPRRXYVXLDXQO-XSQXPFHXSA-N	42607465	CCCCC/C=C\C/C=C\C/C=C\C/C=C\CCCC(=O)OC[C@H](COP(=O)(O)OCCN)O	0.93	0.99	42607465	52	5.803	Phosphatidylethanolamines		1
erythritol	UNXHWFMMPAWVPI-ZXZARUISSA-N	222285	C([C@H]([C@H](CO)O)O)O	0.93	1	222285	81	-2.552	Sugar Alcohols		1
homoserine	UKAUYVFTDYCKQA-VKHMYHEASA-N	12647	C(CO)[C@@H](C(=O)O)N	0.94	1	12647	72	-3.598	Amino Acids		1
p-cresol sulfate	WGNAKZGUSRVWRH-UHFFFAOYSA-N	4615423	CC1=CC=C(C=C1)OS(=O)(=O)O	0.94	1	4615423	95	-0.508	Cresols		1
3-methylhistidine	JDHILDINMRGULE-LURJTMIESA-N	64969	CN1C=NC=C1C[C@@H](C(=O)O)N	0.94	0.96	64969	88	-3.125	Histidine		1
2-aminophenol sulfate	VSTZVCJQGSLNLL-UHFFFAOYSA-N	181670	C1=CC=C(C(=C1)N)OS(=O)(=O)O	0.95	1	181670	45	-1.174			1
2-piperidinone	XUWHAWMETYGRKB-UHFFFAOYSA-N	12665	C1CCNC(=O)C1	0.95	1	12665	130	0.046	Piperidones		1
beta-cryptoxanthin	DMASLKHVQRHNES-QQGJMDNJSA-N	6384256	CC1=C(C(CCC1)(C)C)/C=C/C(=C/C=C/C(=C/C=C/C=C(\C)/C=C/C=C(\C)/C=C/C2=C(CC(CC2(C)C)O)C)/C)/C	0.95	1	6384256	129	12.649	Zeaxanthins		1
N-acetylproline	GNMSLDIYJOSUSW-UHFFFAOYSA-N	322640	CC(=O)N1CCCC1C(=O)O	0.96	1	322640	60	-0.157	Imino Acids		1
5-bromotryptophan	KZDNJQUJBMDHJW-UHFFFAOYSA-N	96735	C1=CC2=C(C=C1Br)C(=CN2)CC(C(=O)O)N	0.96	1	96735	11	-1.481	Indoles		1
N-formylmethionine	PYUSHNKNPOHWEZ-YFKPBYRVSA-N	439750	CSCC[C@@H](C(=O)O)NC=O	0.96	0.99	439750	63	0.353	Methionine		1
1-myristoyl-2-palmitoyl-GPC (14:0/16:0)	RFVFQQWKPSOBED-PSXMRANNSA-N	129657	CCCCCCCCCCCCCCCC(=O)O[C@H](COC(=O)CCCCCCCCCCCCC)COP(=O)([O-])OCC[N+](C)(C)C	0.96	1	129657	89	12.714	Saturated_Phosphatidylcholines		1
3-carboxy-4-methyl-5-propyl-2-furanpropanoate (CMPF)	WMCQWXZMVIETAO-UHFFFAOYSA-N	123979	CCCC1=C(C(=C(O1)CCC(=O)O)C(=O)O)C	0.97	1.1	123979	79	1.087	Epoxy FA_12		1
EDTA	KCXVZYZYPLLWCC-UHFFFAOYSA-N	6049	C(CN(CC(=O)O)CC(=O)O)N(CC(=O)O)CC(=O)O	0.97	1	6049	39	-2.556	Ethylenediamines		1
palmitoyl-linoleoyl-glycerol (16:0/18:2) [1]*	SVXWJFFKLMLOHO-YAIZGCQRSA-N	9543695	CCCCCCCCCCCCCCCC(=O)OC[C@H](CO)OC(=O)CCCCCCC/C=C\C/C=C\CCCCC	0.97	1.1	9543695	27	15.195	Glycerides	f	1
allantoin	POJWUDADGALRAB-UHFFFAOYSA-N	204	C1(C(=O)NC(=O)N1)NC(=O)N	0.97	0.98	204	131	-1.169	Hydantoins		1
kynurenate	HCZHHEIFKROPDY-UHFFFAOYSA-N	3845	C1=CC=C2C(=C1)C(=O)C=C(N2)C(=O)O	0.97	0.99	3845	109	0.665	Hydroxyquinolines		1
C-glycosyltryptophan	CPXSBHKDEPPWIX-RAYCSJGISA-N	10981970	C1=CC=C2C(=C1)C(=C(N2)[C@@H]3[C@H]([C@H]([C@@H]([C@H](O3)CO)O)O)O)C[C@@H](C(=O)O)N	0.97	1	10981970	40	-3.813	Indoles		1
S-methylcysteine	IDIDJDIHTAOVLG-VKHMYHEASA-N	24417	CSC[C@@H](C(=O)O)N	0.97	1	24417	101	-2.211	Methionine		1
kynurenine	YGPSJZOEDVAXAB-QMMMGPOBSA-N	161166	C1=CC=C(C(=C1)C(=O)C[C@@H](C(=O)O)N)N	0.98	1	161166	128	-2.868	Amino Acids		1
O-sulfo-L-tyrosine	CIQHWLTYGMYQQR-QMMMGPOBSA-N	514186	C1=CC(=CC=C1C[C@@H](C(=O)O)N)OS(=O)(=O)O	0.98	0.99	514186	61	-4.557	Amino Acids, Aromatic		1
O-acetylhomoserine	FCXZBWSIAGGPCB-YFKPBYRVSA-N	439389	CC(=O)OCC[C@@H](C(=O)O)N	0.98	1	439389	72	-2.858	Butyrates		1
hydantoin-5-propionic acid	VWFWNXQAMGDPGG-UHFFFAOYSA-N	782	C(CC(=O)O)C1C(=O)NC(=O)N1	0.98	0.98	782	10	-0.888	Hydantoins		1
glycolithocholate sulfate*	FHXBAFXQVZOILS-OETIFKLTSA-N	72222	C[C@H](CCC(=O)NCC(=O)O)[C@H]1CC[C@@H]2[C@@]1(CC[C@H]3[C@H]2CC[C@H]4[C@@]3(CC[C@H](C4)OS(=O)(=O)O)C)C	0.99	0.97	72222	14	6.138	Deoxycholic Acid		1
glutamate, gamma-methyl ester	ZGEYCCHDTIDZAE-BYPYZUCNSA-N	68662	COC(=O)CC[C@@H](C(=O)O)N	0.99	1	68662	42	-3.028	Glutamates		1
hippurate	QIAFMBKCNZACKA-UHFFFAOYSA-N	464	C1=CC=C(C=C1)C(=O)NCC(=O)O	0.99	0.97	464	120	0.154	Hippurates		1
methionine sulfoxide	QEFRNWWLZKMPFJ-YGVKFDHGSA-N	158980	CS(=O)CC[C@@H](C(=O)O)N	0.99	1	158980	56	-3.882	Methionine		1
glycerophosphorylcholine (GPC)	SUHOQUVVVLNYQR-QMMMGPOBSA-N	71920	C[N+](C)(C)CCOP(=O)([O-])OC[C@H](CO)O	0.99	0.64	71920	127	-2.928	Saturated_Phosphatidylcholines		1
7-methylurate	YHNNPKUFPWLTOP-UHFFFAOYSA-N	69160	CN1C2=C(NC(=O)NC2=O)NC1=O	0.99	1	69160	1	-1.478	Xanthines	b	1

## Sheet: Cluster ChemRICH
Cluster name	Cluster size	p-values	FDR	Key compound	Altered metabolites	Increased	Decreased	Increased ratio	Altered Ratio
Saturated_Lysophosphatidylcholines	3	0.0021	0.07	1-palmitoyl-GPC (16:0)	2	2	0	1	0.7
Ethanolamines	6	0.0034	0.07	palmitoyl ethanolamide	4	4	0	1	0.7
Amino Acids, Basic	7	0.0035	0.07	arginine	3	1	2	0.3	0.4
Sphingomyelins	3	0.0054	0.07	palmitoyl sphingomyelin (d18:1/16:0)	2	2	0	1	0.7
Hexoses	4	0.0057	0.07	mannose	3	1	2	0.3	0.8
NewCluster_30	4	0.015	0.14	oleoylcarnitine (C18:1)	3	3	0	1	0.8
Unsaturated_Lysophosphatidylcholines	3	0.016	0.14	1-oleoyl-GPC (18:1)	2	2	0	1	0.7
Saturated_Fatty Acids	4	0.028	0.21	stearamide	2	2	0	1	0.5
Dipeptides	32	0.073	0.5	gamma-glutamylglutamine	6	3	3	0.5	0.2
Pyrrolidinones	4	0.098	0.61	5-oxoproline	2	1	1	0.5	0.5
Oleic Acids	5	0.13	0.74	linoleoyl ethanolamide	2	2	0	1	0.4
Carnitine	17	0.25	1	palmitoylcarnitine (C16)	3	2	1	0.7	0.2
Acids, Carbocyclic	5	1	1	2-hydroxyphenylacetate	1	1	0	1	0.2
Amino Acids	8	1	1	3-aminoisobutyrate	0	0	0	#NUM!	0
Amino Acids, Aromatic	7	1	1	3-methoxytyrosine	0	0	0	#NUM!	0
Amino Acids, Branched-Chain	3	1	1	isoleucine	0	0	0	#NUM!	0
Amino Acids, Diamino	6	1	1	citrulline	1	0	1	0	0.2
Amino Acids, Sulfur	5	1	1	cysteine s-sulfate	0	0	0	#NUM!	0
Androstenols	4	1	1	3beta-hydroxy-5-cholestenoate	0	0	0	#NUM!	0
Bile Pigments	4	1	1	bilirubin (E,Z or Z,E)*	0	0	0	#NUM!	0
Butyrates	8	1	1	alpha-ketobutyrate	1	0	1	0	0.1
Cholestenes	4	1	1	4-cholesten-3-one	0	0	0	#NUM!	0
Cholic Acids	7	1	1	cholate	0	0	0	#NUM!	0
Cresols	3	1	1	p-cresol-glucuronide*	0	0	0	#NUM!	0
Deoxycholic Acid	5	1	1	glycoursodeoxycholate	0	0	0	#NUM!	0
Dicarboxylic Acids	11	1	1	fumarate	1	1	0	1	0.09
DiHOME	3	1	1	12,13-DiHOME	0	0	0	#NUM!	0
Glutamates	6	1	1	glutamate	0	0	0	#NUM!	0
Glutarates	10	1	1	3-hydroxy-3-methylglutarate	1	0	1	0	0.1
Glycerides	4	1	1	1-linoleoylglycerol (18:2)	0	0	0	#NUM!	0
Guanidines	4	1	1	argininate*	0	0	0	#NUM!	0
Hippurates	4	1	1	2-hydroxyhippurate (salicylurate)	0	0	0	#NUM!	0
Histidine	3	1	1	ergothioneine	0	0	0	#NUM!	0
Imidazoles	5	1	1	4-imidazoleacetate	1	1	0	1	0.2
Imino Acids	6	1	1	proline	0	0	0	#NUM!	0
Indoles	9	1	1	indole-3-carboxylic acid	0	0	0	#NUM!	0
Keto Acids	4	1	1	acetoacetate	1	0	1	0	0.2
Lysophospholipids	4	1	1	1-(1-enyl-palmitoyl)-GPC (P-16:0)*	1	1	0	1	0.2
Malonates	3	1	1	methylmalonate (MMA)	0	0	0	#NUM!	0
Methionine	5	1	1	S-methylcysteine sulfoxide	0	0	0	#NUM!	0
O=FA_20_1	3	1	1	eicosanodioate	0	0	0	#NUM!	0
OH-FA_16_0_1	3	1	1	2-hydroxystearate	0	0	0	#NUM!	0
OH-FA_8_0_1	6	1	1	2-hydroxydecanoate	0	0	0	#NUM!	0
Phosphatidylethanolamines	13	1	1	1-palmitoyl-2-docosahexaenoyl-GPE (16:0/22:6)*	0	0	0	#NUM!	0
Pipecolic Acids	3	1	1	homostachydrine*	0	0	0	#NUM!	0
Pregnenes	5	1	1	cortisol	0	0	0	#NUM!	0
Purine Nucleosides	6	1	1	N1-methylinosine	1	1	0	1	0.2
Pyridines	6	1	1	pyridoxate	0	0	0	#NUM!	0
Pyrimidine Nucleosides	7	1	1	3-methylcytidine	1	0	1	0	0.1
Pyruvates	4	1	1	4-hydroxyphenylpyruvate	1	0	1	0	0.2
Saturated_Ceramides	4	1	1	sphinganine	0	0	0	#NUM!	0
Saturated FA	16	1	1	arachidate (20:0)	1	1	0	1	0.06
Saturated_Phosphatidylcholines	3	1	1	1,2-dipalmitoyl-GPC (16:0/16:0)	1	0	1	0	0.3
Sugar Acids	4	1	1	2-keto-3-deoxy-gluconate	1	1	0	1	0.2
Sugar Alcohols	6	1	1	glycerol	0	0	0	#NUM!	0
Sulfuric Acids	3	1	1	phenol sulfate	0	0	0	#NUM!	0
Taurocholic Acid	3	1	1	taurolithocholate 3-sulfate	0	0	0	#NUM!	0
Trimethyl Ammonium Compounds	4	1	1	carnitine	0	0	0	#NUM!	0
UnSaturated FA	20	1	1	10-heptadecenoate (17:1n7)	0	0	0	#NUM!	0
Unsaturated_Phosphatidylcholines	8	1	1	1,2-dilinoleoyl-GPC (18:2/18:2)	1	1	0	1	0.1
Valerates	5	1	1	3-hydroxy-2-ethylpropionate	0	0	0	#NUM!	0
Xanthines	11	1	1	xanthine	0	0	0	#NUM!	0
